# Supplementary material for: Structure and reactivity of a mononuclear gold(II) complex
Source: Springer Nature journal article supplement (doi:10.1038/nchem.2836), 2017-08-07
Supplement: 41557_2017_BFnchem2836_MOESM8_ESM.mol [file 41557_2017_BFnchem2836_MOESM8_ESM.mol]

nchem.2836-compAuTPPPF6.mol
  ChemDraw07181723332D

 56 61  0  0  0  0  0  0  0  0999 V2000
    3.8334   -2.6985    0.0000 P   0  0  0  0  0  0  0  0  0  0  0  0
    4.3163   -3.3632    0.0000 F   0  0  0  0  0  0  0  0  0  0  0  0
    4.6148   -2.4446    0.0000 F   0  0  0  0  0  0  0  0  0  0  0  0
    3.8334   -1.8768    0.0000 F   0  0  0  0  0  0  0  0  0  0  0  0
    3.0520   -2.4446    0.0000 F   0  0  0  0  0  0  0  0  0  0  0  0
    3.3504   -3.3632    0.0000 F   0  0  0  0  0  0  0  0  0  0  0  0
    2.2304   -2.6200    0.0000 F   0  5  0  0  0  0  0  0  0  0  0  0
    0.4492    0.7142    0.0000 N   0  5  0  0  0  0  0  0  0  0  0  0
    0.4492   -0.7148    0.0000 N   0  0  0  0  0  0  0  0  0  0  0  0
   -0.9787   -0.7154    0.0000 N   0  5  0  0  0  0  0  0  0  0  0  0
   -0.9809    0.7135    0.0000 N   0  0  0  0  0  0  0  0  0  0  0  0
   -0.2655    2.6972    0.0000 C   0  0  0  0  0  0  0  0  0  0  0  0
   -0.2651   -2.6972    0.0000 C   0  0  0  0  0  0  0  0  0  0  0  0
    2.4319    0.0002    0.0000 C   0  0  0  0  0  0  0  0  0  0  0  0
    1.6103   -0.0003    0.0000 C   0  0  0  0  0  0  0  0  0  0  0  0
   -0.2648   -1.8756    0.0000 C   0  0  0  0  0  0  0  0  0  0  0  0
   -0.2659    1.8756    0.0000 C   0  0  0  0  0  0  0  0  0  0  0  0
   -2.1425   -0.0006    0.0000 C   0  0  0  0  0  0  0  0  0  0  0  0
    1.2638    0.5839    0.0000 C   0  0  0  0  0  0  0  0  0  0  0  0
    1.6394    1.3184    0.0000 C   0  0  0  0  0  0  0  0  0  0  0  0
    1.0561    1.9018    0.0000 C   0  0  0  0  0  0  0  0  0  0  0  0
    0.3199    1.5278    0.0000 C   0  0  0  0  0  0  0  0  0  0  0  0
   -1.7933   -0.5852    0.0000 C   0  0  0  0  0  0  0  0  0  0  0  0
   -2.1690   -1.3197    0.0000 C   0  0  0  0  0  0  0  0  0  0  0  0
   -1.5856   -1.9031    0.0000 C   0  0  0  0  0  0  0  0  0  0  0  0
   -0.8494   -1.5291    0.0000 C   0  0  0  0  0  0  0  0  0  0  0  0
   -0.8519    1.5284    0.0000 C   0  0  0  0  0  0  0  0  0  0  0  0
   -1.5871    1.9028    0.0000 C   0  0  0  0  0  0  0  0  0  0  0  0
   -2.1704    1.3195    0.0000 C   0  0  0  0  0  0  0  0  0  0  0  0
   -1.7958    0.5845    0.0000 C   0  0  0  0  0  0  0  0  0  0  0  0
    0.3202   -1.5297    0.0000 C   0  0  0  0  0  0  0  0  0  0  0  0
    1.0554   -1.9041    0.0000 C   0  0  0  0  0  0  0  0  0  0  0  0
    1.6387   -1.3207    0.0000 C   0  0  0  0  0  0  0  0  0  0  0  0
    1.2641   -0.5858    0.0000 C   0  0  0  0  0  0  0  0  0  0  0  0
   -2.9648   -0.0021    0.0000 C   0  0  0  0  0  0  0  0  0  0  0  0
    2.8451   -0.7138    0.0000 C   0  0  0  0  0  0  0  0  0  0  0  0
    3.6701   -0.7138    0.0000 C   0  0  0  0  0  0  0  0  0  0  0  0
    4.0819    0.0002    0.0000 C   0  0  0  0  0  0  0  0  0  0  0  0
    3.6701    0.7143    0.0000 C   0  0  0  0  0  0  0  0  0  0  0  0
    2.8451    0.7143    0.0000 C   0  0  0  0  0  0  0  0  0  0  0  0
   -3.3792    0.7112    0.0000 C   0  0  0  0  0  0  0  0  0  0  0  0
   -4.2042    0.7112    0.0000 C   0  0  0  0  0  0  0  0  0  0  0  0
   -4.6148   -0.0021    0.0000 C   0  0  0  0  0  0  0  0  0  0  0  0
   -4.2042   -0.7155    0.0000 C   0  0  0  0  0  0  0  0  0  0  0  0
   -3.3792   -0.7155    0.0000 C   0  0  0  0  0  0  0  0  0  0  0  0
    0.4489    3.1099    0.0000 C   0  0  0  0  0  0  0  0  0  0  0  0
    0.4489    3.9349    0.0000 C   0  0  0  0  0  0  0  0  0  0  0  0
   -0.2655    4.3472    0.0000 C   0  0  0  0  0  0  0  0  0  0  0  0
   -0.9799    3.9349    0.0000 C   0  0  0  0  0  0  0  0  0  0  0  0
   -0.9799    3.1099    0.0000 C   0  0  0  0  0  0  0  0  0  0  0  0
   -0.9795   -3.1099    0.0000 C   0  0  0  0  0  0  0  0  0  0  0  0
   -0.9795   -3.9349    0.0000 C   0  0  0  0  0  0  0  0  0  0  0  0
   -0.2651   -4.3472    0.0000 C   0  0  0  0  0  0  0  0  0  0  0  0
    0.4493   -3.9349    0.0000 C   0  0  0  0  0  0  0  0  0  0  0  0
    0.4493   -3.1099    0.0000 C   0  0  0  0  0  0  0  0  0  0  0  0
   -0.2832   -0.0033    0.0000 Au  0  1  0  0  0  0  0  0  0  0  0  0
  1  2  1  0      
  1  3  1  0      
  1  4  1  0      
  1  5  1  0      
  1  6  1  0      
  8 19  1  0      
 19 20  1  0      
 20 21  2  0      
 21 22  1  0      
 22  8  1  0      
 10 23  1  0      
 23 24  2  0      
 24 25  1  0      
 25 26  2  0      
 26 10  1  0      
 11 27  2  0      
 27 28  1  0      
 28 29  2  0      
 29 30  1  0      
 30 11  1  0      
  9 31  1  0      
 31 32  1  0      
 32 33  2  0      
 33 34  1  0      
 34  9  2  0      
 17 27  1  0      
 17 22  2  0      
 19 15  2  0      
 15 34  1  0      
 31 16  2  0      
 16 26  1  0      
 23 18  1  0      
 18 30  2  0      
 17 12  1  0      
 16 13  1  0      
 15 14  1  0      
 18 35  1  0      
 14 36  2  0      
 36 37  1  0      
 37 38  2  0      
 38 39  1  0      
 39 40  2  0      
 40 14  1  0      
 35 41  2  0      
 41 42  1  0      
 42 43  2  0      
 43 44  1  0      
 44 45  2  0      
 45 35  1  0      
 12 46  2  0      
 46 47  1  0      
 47 48  2  0      
 48 49  1  0      
 49 50  2  0      
 50 12  1  0      
 13 51  2  0      
 51 52  1  0      
 52 53  2  0      
 53 54  1  0      
 54 55  2  0      
 55 13  1  0      
M  CHG  4   7  -1   8  -1  10  -1  56   3
M  STY  1   1 SUP
M  SLB  1   1   1
M  SAL   1  7   1   2   3   4   5   6   7
M  SMT   1 PF6
M  END
