# Supplementary material for: Structure and reactivity of a mononuclear gold(II) complex
Source: Springer Nature journal article supplement (doi:10.1038/nchem.2836), 2017-08-07
Supplement: 41557_2017_BFnchem2836_MOESM12_ESM.cif [file 41557_2017_BFnchem2836_MOESM12_ESM.cif]

 
data_sp_tpp_thf_0m
 
_audit_creation_method            'SHELXL-2014/7'
_shelx_SHELXL_version_number      '2014/7'
_chemical_name_systematic         ?
_chemical_name_common             ?
_chemical_melting_point           ?
_chemical_formula_moiety          ?
_chemical_formula_sum
 'C44 H28 Au N4' 
_chemical_formula_weight          809.67

loop_
 _atom_type_symbol
 _atom_type_description
 _atom_type_scat_dispersion_real
 _atom_type_scat_dispersion_imag
 _atom_type_scat_source
 'C'  'C'   0.0033   0.0016
 'International Tables Vol C Tables 4.2.6.8 and 6.1.1.4'
 'H'  'H'   0.0000   0.0000
 'International Tables Vol C Tables 4.2.6.8 and 6.1.1.4'
 'N'  'N'   0.0061   0.0033
 'International Tables Vol C Tables 4.2.6.8 and 6.1.1.4'
 'Au'  'Au'  -2.0133   8.8022
 'International Tables Vol C Tables 4.2.6.8 and 6.1.1.4'
 
_space_group_crystal_system       triclinic
_space_group_IT_number            2
_space_group_name_H-M_alt         'P -1'
_space_group_name_Hall            '-P 1'
 
_shelx_space_group_comment
;
The symmetry employed for this shelxl refinement is uniquely defined
by the following loop, which should always be used as a source of
symmetry information in preference to the above space-group names.
They are only intended as comments.
;
 
loop_
 _space_group_symop_operation_xyz
 'x, y, z'
 '-x, -y, -z'
 
_cell_length_a                    6.1691(2)
_cell_length_b                    10.6043(4)
_cell_length_c                    12.4939(5)
_cell_angle_alpha                 97.4790(10)
_cell_angle_beta                  97.4530(10)
_cell_angle_gamma                 99.9250(10)
_cell_volume                      788.51(5)
_cell_formula_units_Z             1
_cell_measurement_temperature     173(2)
_cell_measurement_reflns_used     7431
_cell_measurement_theta_min       2.3751
_cell_measurement_theta_max       27.9142
 
_exptl_crystal_description        plate
_exptl_crystal_colour             brown
_exptl_crystal_density_meas       ?
_exptl_crystal_density_method     ?
_exptl_crystal_density_diffrn     1.705          
_exptl_crystal_F_000              399
_exptl_transmission_factor_min    ?
_exptl_transmission_factor_max    ?
_exptl_crystal_size_max           0.200
_exptl_crystal_size_mid           0.150
_exptl_crystal_size_min           0.050
_exptl_absorpt_coefficient_mu     4.705
_shelx_estimated_absorpt_T_min    0.453
_shelx_estimated_absorpt_T_max    0.799
_exptl_absorpt_correction_type    multi-scan
_exptl_absorpt_correction_T_min   0.73982
_exptl_absorpt_correction_T_max   1.35416
_exptl_absorpt_process_details    MULABS
_exptl_absorpt_special_details    ?
_diffrn_ambient_temperature       173(2)
_diffrn_radiation_wavelength      0.71073
_diffrn_radiation_type            MoK\a
_diffrn_source                    ?
_diffrn_measurement_device_type   'CCD area detector'
_diffrn_measurement_method        'phi and omega scans'
_diffrn_detector_area_resol_mean  ?
_diffrn_reflns_number             9273
_diffrn_reflns_av_unetI/netI      0.0459
_diffrn_reflns_av_R_equivalents   0.0496
_diffrn_reflns_limit_h_min        -8
_diffrn_reflns_limit_h_max        8
_diffrn_reflns_limit_k_min        -13
_diffrn_reflns_limit_k_max        13
_diffrn_reflns_limit_l_min        -16
_diffrn_reflns_limit_l_max        16
_diffrn_reflns_theta_min          2.375
_diffrn_reflns_theta_max          27.939
_diffrn_reflns_theta_full         25.242
_diffrn_measured_fraction_theta_max   0.999
_diffrn_measured_fraction_theta_full  0.999
_diffrn_reflns_Laue_measured_fraction_max    0.999
_diffrn_reflns_Laue_measured_fraction_full   0.999
_diffrn_reflns_point_group_measured_fraction_max   0.999
_diffrn_reflns_point_group_measured_fraction_full  0.999
_reflns_number_total              3774
_reflns_number_gt                 3773
_reflns_threshold_expression      'I > 2\s(I)'
_reflns_Friedel_coverage          0.000
_reflns_Friedel_fraction_max      .
_reflns_Friedel_fraction_full     .
 
_reflns_special_details
;
 Reflections were merged by SHELXL according to the crystal
 class for the calculation of statistics and refinement.
 
 _reflns_Friedel_fraction is defined as the number of unique
 Friedel pairs measured divided by the number that would be
 possible theoretically, ignoring centric projections and
 systematic absences.
;
 
_computing_data_collection        'Bruker SMART'
_computing_cell_refinement        'Bruker SMART'
_computing_data_reduction         'Bruker SAINT'
_computing_structure_solution     ?
_computing_structure_refinement 'SHELXL-2014/7 (Sheldrick, 2014)'
_computing_molecular_graphics     ?
_computing_publication_material   ?
_refine_special_details           ?
_refine_ls_structure_factor_coef  Fsqd
_refine_ls_matrix_type            full
_refine_ls_weighting_scheme       calc
_refine_ls_weighting_details
'w=1/[\s^2^(Fo^2^)+(0.0303P)^2^] where P=(Fo^2^+2Fc^2^)/3'
_atom_sites_solution_primary      ?
_atom_sites_solution_secondary    ?
_atom_sites_solution_hydrogens    geom
_refine_ls_hydrogen_treatment     constr
_refine_ls_extinction_method      none
_refine_ls_extinction_coef        .
_refine_ls_number_reflns          3774
_refine_ls_number_parameters      223
_refine_ls_number_restraints      0
_refine_ls_R_factor_all           0.0249
_refine_ls_R_factor_gt            0.0246
_refine_ls_wR_factor_ref          0.0569
_refine_ls_wR_factor_gt           0.0569
_refine_ls_goodness_of_fit_ref    1.066
_refine_ls_restrained_S_all       1.066
_refine_ls_shift/su_max           0.001
_refine_ls_shift/su_mean          0.000
 
loop_
 _atom_site_label
 _atom_site_type_symbol
 _atom_site_fract_x
 _atom_site_fract_y
 _atom_site_fract_z
 _atom_site_U_iso_or_equiv
 _atom_site_adp_type
 _atom_site_occupancy
 _atom_site_site_symmetry_order  
 _atom_site_calc_flag
 _atom_site_refinement_flags_posn
 _atom_site_refinement_flags_adp
 _atom_site_refinement_flags_occupancy
 _atom_site_disorder_assembly
 _atom_site_disorder_group
Au1 Au 0.5000 0.5000 0.5000 0.01691(6) Uani 1 2 d S . P . .
N1 N 0.2284(4) 0.3602(2) 0.4266(2) 0.0189(5) Uani 1 1 d . . . . .
N2 N 0.3662(4) 0.5127(2) 0.64613(19) 0.0170(5) Uani 1 1 d . . . . .
C1 C 0.1811(5) 0.3053(3) 0.3171(2) 0.0189(6) Uani 1 1 d . . . . .
C2 C -0.0284(5) 0.2168(3) 0.2994(2) 0.0232(6) Uani 1 1 d . . . . .
H2 H -0.1013 0.1669 0.2315 0.028 Uiso 1 1 calc R U . . .
C3 C -0.1040(5) 0.2167(3) 0.3964(2) 0.0233(6) Uani 1 1 d . . . . .
H3 H -0.2392 0.1668 0.4088 0.028 Uiso 1 1 calc R U . . .
C4 C 0.0580(5) 0.3061(3) 0.4776(2) 0.0196(6) Uani 1 1 d . . . . .
C5 C 0.0433(5) 0.3312(3) 0.5893(2) 0.0189(5) Uani 1 1 d . . . . .
C6 C -0.1372(5) 0.2425(3) 0.6289(2) 0.0184(5) Uani 1 1 d . . . . .
C7 C -0.1454(5) 0.1091(3) 0.6121(3) 0.0225(6) Uani 1 1 d . . . . .
H7 H -0.0356 0.0749 0.5771 0.027 Uiso 1 1 calc R U . . .
C8 C -0.3137(6) 0.0257(3) 0.6464(3) 0.0277(7) Uani 1 1 d . . . . .
H8 H -0.3196 -0.0652 0.6339 0.033 Uiso 1 1 calc R U . . .
C9 C -0.4718(5) 0.0753(3) 0.6985(3) 0.0283(7) Uani 1 1 d . . . . .
H9 H -0.5869 0.0183 0.7216 0.034 Uiso 1 1 calc R U . . .
C10 C -0.4633(5) 0.2077(3) 0.7174(3) 0.0263(6) Uani 1 1 d . . . . .
H10 H -0.5710 0.2417 0.7543 0.032 Uiso 1 1 calc R U . . .
C11 C -0.2960(5) 0.2912(3) 0.6820(3) 0.0225(6) Uani 1 1 d . . . . .
H11 H -0.2910 0.3820 0.6944 0.027 Uiso 1 1 calc R U . . .
C12 C 0.1896(5) 0.4249(3) 0.6672(2) 0.0179(5) Uani 1 1 d . . . . .
C13 C 0.1891(5) 0.4407(3) 0.7835(2) 0.0218(6) Uani 1 1 d . . . . .
H13 H 0.0844 0.3937 0.8203 0.026 Uiso 1 1 calc R U . . .
C14 C 0.3663(5) 0.5352(3) 0.8308(2) 0.0209(6) Uani 1 1 d . . . . .
H14 H 0.4077 0.5664 0.9068 0.025 Uiso 1 1 calc R U . . .
C15 C 0.4798(5) 0.5798(3) 0.7451(2) 0.0177(5) Uani 1 1 d . . . . .
C16 C 0.6829(5) 0.6685(3) 0.7625(2) 0.0178(5) Uani 1 1 d . . . . .
C17 C 0.7620(5) 0.7399(3) 0.8764(2) 0.0191(6) Uani 1 1 d . . . . .
C18 C 0.6346(5) 0.8208(3) 0.9245(3) 0.0245(6) Uani 1 1 d . . . . .
H18 H 0.4977 0.8307 0.8851 0.029 Uiso 1 1 calc R U . . .
C19 C 0.7073(6) 0.8873(3) 1.0304(3) 0.0316(7) Uani 1 1 d . . . . .
H19 H 0.6184 0.9412 1.0634 0.038 Uiso 1 1 calc R U . . .
C20 C 0.9079(6) 0.8753(3) 1.0878(3) 0.0330(8) Uani 1 1 d . . . . .
H20 H 0.9581 0.9220 1.1594 0.040 Uiso 1 1 calc R U . . .
C21 C 1.0346(6) 0.7957(4) 1.0407(3) 0.0325(8) Uani 1 1 d . . . . .
H21 H 1.1726 0.7874 1.0800 0.039 Uiso 1 1 calc R U . . .
C22 C 0.9618(5) 0.7267(3) 0.9355(3) 0.0270(7) Uani 1 1 d . . . . .
H22 H 1.0491 0.6706 0.9041 0.032 Uiso 1 1 calc R U . . .
 
loop_
 _atom_site_aniso_label
 _atom_site_aniso_U_11
 _atom_site_aniso_U_22
 _atom_site_aniso_U_33
 _atom_site_aniso_U_23
 _atom_site_aniso_U_13
 _atom_site_aniso_U_12
Au1 0.01952(8) 0.01639(8) 0.01334(8) -0.00056(5) 0.00132(5) 0.00250(5)
N1 0.0223(12) 0.0184(12) 0.0140(11) -0.0010(9) 0.0036(9) 0.0008(9)
N2 0.0206(11) 0.0158(11) 0.0123(11) -0.0004(8) -0.0008(9) 0.0016(9)
C1 0.0194(13) 0.0183(13) 0.0159(14) -0.0022(10) -0.0015(10) 0.0018(11)
C2 0.0224(14) 0.0250(15) 0.0169(14) -0.0035(11) 0.0003(11) -0.0030(12)
C3 0.0212(14) 0.0247(15) 0.0191(15) -0.0013(11) 0.0005(11) -0.0034(12)
C4 0.0190(13) 0.0179(13) 0.0192(14) -0.0015(10) 0.0016(11) 0.0009(11)
C5 0.0207(13) 0.0161(13) 0.0192(14) 0.0018(10) 0.0036(11) 0.0022(11)
C6 0.0177(13) 0.0205(14) 0.0159(13) 0.0021(10) 0.0017(10) 0.0019(11)
C7 0.0228(14) 0.0199(14) 0.0234(15) -0.0016(11) 0.0054(11) 0.0027(11)
C8 0.0305(16) 0.0201(15) 0.0289(17) -0.0001(12) 0.0014(13) 0.0001(12)
C9 0.0222(15) 0.0346(18) 0.0238(16) 0.0036(13) 0.0031(12) -0.0056(13)
C10 0.0197(14) 0.0368(18) 0.0227(15) 0.0021(13) 0.0061(11) 0.0058(13)
C11 0.0237(14) 0.0224(15) 0.0221(15) 0.0025(11) 0.0033(11) 0.0076(12)
C12 0.0198(13) 0.0185(13) 0.0151(13) 0.0003(10) 0.0029(10) 0.0042(11)
C13 0.0263(15) 0.0216(14) 0.0173(14) 0.0014(11) 0.0071(11) 0.0027(12)
C14 0.0254(14) 0.0230(14) 0.0123(13) -0.0008(10) 0.0012(11) 0.0032(12)
C15 0.0230(13) 0.0169(13) 0.0117(13) -0.0022(10) 0.0000(10) 0.0051(11)
C16 0.0231(14) 0.0159(13) 0.0136(13) -0.0005(10) -0.0001(10) 0.0054(11)
C17 0.0211(13) 0.0198(14) 0.0134(13) -0.0007(10) 0.0023(10) -0.0015(11)
C18 0.0288(15) 0.0231(15) 0.0199(15) -0.0010(11) 0.0022(12) 0.0043(12)
C19 0.0436(19) 0.0281(17) 0.0212(16) -0.0038(12) 0.0086(14) 0.0043(14)
C20 0.046(2) 0.0308(17) 0.0131(15) -0.0043(12) 0.0007(13) -0.0093(15)
C21 0.0290(16) 0.043(2) 0.0194(16) 0.0080(14) -0.0055(12) -0.0034(15)
C22 0.0255(15) 0.0335(17) 0.0205(15) 0.0019(12) 0.0015(12) 0.0046(13)
 
_geom_special_details
;
 All esds (except the esd in the dihedral angle between two l.s. planes)
 are estimated using the full covariance matrix.  The cell esds are taken
 into account individually in the estimation of esds in distances, angles
 and torsion angles; correlations between esds in cell parameters are only
 used when they are defined by crystal symmetry.  An approximate (isotropic)
 treatment of cell esds is used for estimating esds involving l.s. planes.
;
 
loop_
 _geom_bond_atom_site_label_1
 _geom_bond_atom_site_label_2
 _geom_bond_distance
 _geom_bond_site_symmetry_2
 _geom_bond_publ_flag
Au1 N1 2.059(2) . ?
Au1 N1 2.059(2) 2_666 ?
Au1 N2 2.097(2) . ?
Au1 N2 2.097(2) 2_666 ?
N1 C4 1.379(4) . ?
N1 C1 1.387(4) . ?
N2 C15 1.379(3) . ?
N2 C12 1.382(4) . ?
C1 C16 1.406(4) 2_666 ?
C1 C2 1.433(4) . ?
C2 C3 1.354(4) . ?
C2 H2 0.9500 . ?
C3 C4 1.444(4) . ?
C3 H3 0.9500 . ?
C4 C5 1.404(4) . ?
C5 C12 1.401(4) . ?
C5 C6 1.507(4) . ?
C6 C11 1.386(4) . ?
C6 C7 1.394(4) . ?
C7 C8 1.393(4) . ?
C7 H7 0.9500 . ?
C8 C9 1.380(5) . ?
C8 H8 0.9500 . ?
C9 C10 1.383(5) . ?
C9 H9 0.9500 . ?
C10 C11 1.397(4) . ?
C10 H10 0.9500 . ?
C11 H11 0.9500 . ?
C12 C13 1.442(4) . ?
C13 C14 1.360(4) . ?
C13 H13 0.9500 . ?
C14 C15 1.439(4) . ?
C14 H14 0.9500 . ?
C15 C16 1.405(4) . ?
C16 C1 1.406(4) 2_666 ?
C16 C17 1.499(4) . ?
C17 C22 1.390(4) . ?
C17 C18 1.392(4) . ?
C18 C19 1.394(4) . ?
C18 H18 0.9500 . ?
C19 C20 1.381(6) . ?
C19 H19 0.9500 . ?
C20 C21 1.374(5) . ?
C20 H20 0.9500 . ?
C21 C22 1.396(5) . ?
C21 H21 0.9500 . ?
C22 H22 0.9500 . ?
 
loop_
 _geom_angle_atom_site_label_1
 _geom_angle_atom_site_label_2
 _geom_angle_atom_site_label_3
 _geom_angle
 _geom_angle_site_symmetry_1
 _geom_angle_site_symmetry_3
 _geom_angle_publ_flag
N1 Au1 N1 180.0 . 2_666 ?
N1 Au1 N2 89.95(9) . . ?
N1 Au1 N2 90.05(9) 2_666 . ?
N1 Au1 N2 90.05(9) . 2_666 ?
N1 Au1 N2 89.95(9) 2_666 2_666 ?
N2 Au1 N2 180.00(13) . 2_666 ?
C4 N1 C1 107.7(2) . . ?
C4 N1 Au1 125.82(19) . . ?
C1 N1 Au1 126.49(19) . . ?
C15 N2 C12 107.6(2) . . ?
C15 N2 Au1 124.47(19) . . ?
C12 N2 Au1 124.70(18) . . ?
N1 C1 C16 125.6(3) . 2_666 ?
N1 C1 C2 108.4(2) . . ?
C16 C1 C2 125.9(3) 2_666 . ?
C3 C2 C1 107.9(3) . . ?
C3 C2 H2 126.0 . . ?
C1 C2 H2 126.0 . . ?
C2 C3 C4 107.7(3) . . ?
C2 C3 H3 126.2 . . ?
C4 C3 H3 126.2 . . ?
N1 C4 C5 126.5(3) . . ?
N1 C4 C3 108.3(2) . . ?
C5 C4 C3 125.2(3) . . ?
C12 C5 C4 125.8(3) . . ?
C12 C5 C6 117.7(3) . . ?
C4 C5 C6 116.3(2) . . ?
C11 C6 C7 119.1(3) . . ?
C11 C6 C5 121.2(3) . . ?
C7 C6 C5 119.7(3) . . ?
C6 C7 C8 120.4(3) . . ?
C6 C7 H7 119.8 . . ?
C8 C7 H7 119.8 . . ?
C9 C8 C7 119.9(3) . . ?
C9 C8 H8 120.0 . . ?
C7 C8 H8 120.0 . . ?
C10 C9 C8 120.3(3) . . ?
C10 C9 H9 119.9 . . ?
C8 C9 H9 119.9 . . ?
C9 C10 C11 119.8(3) . . ?
C9 C10 H10 120.1 . . ?
C11 C10 H10 120.1 . . ?
C6 C11 C10 120.5(3) . . ?
C6 C11 H11 119.8 . . ?
C10 C11 H11 119.8 . . ?
N2 C12 C5 125.7(3) . . ?
N2 C12 C13 108.7(2) . . ?
C5 C12 C13 125.5(3) . . ?
C14 C13 C12 107.3(3) . . ?
C14 C13 H13 126.4 . . ?
C12 C13 H13 126.4 . . ?
C13 C14 C15 107.8(2) . . ?
C13 C14 H14 126.1 . . ?
C15 C14 H14 126.1 . . ?
N2 C15 C16 126.6(3) . . ?
N2 C15 C14 108.6(2) . . ?
C16 C15 C14 124.6(3) . . ?
C1 C16 C15 125.7(3) 2_666 . ?
C1 C16 C17 117.5(3) 2_666 . ?
C15 C16 C17 116.8(2) . . ?
C22 C17 C18 119.0(3) . . ?
C22 C17 C16 121.1(3) . . ?
C18 C17 C16 119.9(3) . . ?
C19 C18 C17 120.1(3) . . ?
C19 C18 H18 119.9 . . ?
C17 C18 H18 119.9 . . ?
C20 C19 C18 120.4(3) . . ?
C20 C19 H19 119.8 . . ?
C18 C19 H19 119.8 . . ?
C21 C20 C19 119.7(3) . . ?
C21 C20 H20 120.1 . . ?
C19 C20 H20 120.1 . . ?
C20 C21 C22 120.4(3) . . ?
C20 C21 H21 119.8 . . ?
C22 C21 H21 119.8 . . ?
C17 C22 C21 120.3(3) . . ?
C17 C22 H22 119.9 . . ?
C21 C22 H22 119.9 . . ?
 
loop_
 _geom_torsion_atom_site_label_1
 _geom_torsion_atom_site_label_2
 _geom_torsion_atom_site_label_3
 _geom_torsion_atom_site_label_4
 _geom_torsion
 _geom_torsion_site_symmetry_1
 _geom_torsion_site_symmetry_2
 _geom_torsion_site_symmetry_3
 _geom_torsion_site_symmetry_4
 _geom_torsion_publ_flag
C4 N1 C1 C16 -177.9(3) . . . 2_666 ?
Au1 N1 C1 C16 3.2(4) . . . 2_666 ?
C4 N1 C1 C2 1.5(3) . . . . ?
Au1 N1 C1 C2 -177.4(2) . . . . ?
N1 C1 C2 C3 -0.9(4) . . . . ?
C16 C1 C2 C3 178.5(3) 2_666 . . . ?
C1 C2 C3 C4 0.0(4) . . . . ?
C1 N1 C4 C5 177.8(3) . . . . ?
Au1 N1 C4 C5 -3.3(4) . . . . ?
C1 N1 C4 C3 -1.5(3) . . . . ?
Au1 N1 C4 C3 177.4(2) . . . . ?
C2 C3 C4 N1 0.9(4) . . . . ?
C2 C3 C4 C5 -178.4(3) . . . . ?
N1 C4 C5 C12 6.3(5) . . . . ?
C3 C4 C5 C12 -174.6(3) . . . . ?
N1 C4 C5 C6 -169.2(3) . . . . ?
C3 C4 C5 C6 9.9(4) . . . . ?
C12 C5 C6 C11 60.5(4) . . . . ?
C4 C5 C6 C11 -123.6(3) . . . . ?
C12 C5 C6 C7 -119.5(3) . . . . ?
C4 C5 C6 C7 56.3(4) . . . . ?
C11 C6 C7 C8 1.2(5) . . . . ?
C5 C6 C7 C8 -178.8(3) . . . . ?
C6 C7 C8 C9 -0.8(5) . . . . ?
C7 C8 C9 C10 -0.3(5) . . . . ?
C8 C9 C10 C11 1.0(5) . . . . ?
C7 C6 C11 C10 -0.5(4) . . . . ?
C5 C6 C11 C10 179.4(3) . . . . ?
C9 C10 C11 C6 -0.5(5) . . . . ?
C15 N2 C12 C5 -174.8(3) . . . . ?
Au1 N2 C12 C5 -14.3(4) . . . . ?
C15 N2 C12 C13 1.8(3) . . . . ?
Au1 N2 C12 C13 162.27(19) . . . . ?
C4 C5 C12 N2 3.5(5) . . . . ?
C6 C5 C12 N2 178.9(3) . . . . ?
C4 C5 C12 C13 -172.5(3) . . . . ?
C6 C5 C12 C13 2.9(4) . . . . ?
N2 C12 C13 C14 -1.1(3) . . . . ?
C5 C12 C13 C14 175.5(3) . . . . ?
C12 C13 C14 C15 0.0(3) . . . . ?
C12 N2 C15 C16 172.9(3) . . . . ?
Au1 N2 C15 C16 12.4(4) . . . . ?
C12 N2 C15 C14 -1.8(3) . . . . ?
Au1 N2 C15 C14 -162.35(19) . . . . ?
C13 C14 C15 N2 1.1(3) . . . . ?
C13 C14 C15 C16 -173.7(3) . . . . ?
N2 C15 C16 C1 -7.2(5) . . . 2_666 ?
C14 C15 C16 C1 166.8(3) . . . 2_666 ?
N2 C15 C16 C17 173.8(3) . . . . ?
C14 C15 C16 C17 -12.3(4) . . . . ?
C1 C16 C17 C22 -60.9(4) 2_666 . . . ?
C15 C16 C17 C22 118.3(3) . . . . ?
C1 C16 C17 C18 119.2(3) 2_666 . . . ?
C15 C16 C17 C18 -61.7(4) . . . . ?
C22 C17 C18 C19 0.0(5) . . . . ?
C16 C17 C18 C19 180.0(3) . . . . ?
C17 C18 C19 C20 1.1(5) . . . . ?
C18 C19 C20 C21 -1.1(5) . . . . ?
C19 C20 C21 C22 -0.1(5) . . . . ?
C18 C17 C22 C21 -1.1(5) . . . . ?
C16 C17 C22 C21 178.9(3) . . . . ?
C20 C21 C22 C17 1.2(5) . . . . ?
 
_refine_diff_density_max    1.367
_refine_diff_density_min   -1.006
_refine_diff_density_rms    0.133

_shelx_res_file
;

    sp_tpp_thf_0m.res created by SHELXL-2014/7


TITL sp_tpp_thf_0m_a.res in P-1
REM Old TITL sp_tpp_thf_0m in P1

REM SHELXT solution in P-1
REM R1 0.053,  Rweak 0.253,  Alpha 0.070,  Orientation as input
REM Formula found by SHELXT:  C44 N4 Au

CELL  0.71073   6.1691  10.6043  12.4939   97.479   97.453   99.925
ZERR    1.000   0.0002   0.0004   0.0005    0.001    0.001    0.001
LATT  1
SFAC C H N AU
UNIT 44 28 4 1

TEMP -100.000
SIZE 0.05 0.15 0.20
L.S. 30
acta
conf
htab
shel 9 0
BOND $H
LIST 4
FMAP 2
PLAN 20
WGHT    0.030300
FVAR       0.53902
AU1   4    0.500000    0.500000    0.500000    10.50000    0.01952    0.01639 =
         0.01334   -0.00056    0.00132    0.00250
N1    3    0.228388    0.360210    0.426567    11.00000    0.02233    0.01840 =
         0.01402   -0.00100    0.00360    0.00080
N2    3    0.366217    0.512670    0.646126    11.00000    0.02060    0.01582 =
         0.01229   -0.00041   -0.00079    0.00162
C1    1    0.181054    0.305347    0.317108    11.00000    0.01939    0.01826 =
         0.01594   -0.00223   -0.00153    0.00183
C2    1   -0.028391    0.216768    0.299372    11.00000    0.02236    0.02502 =
         0.01692   -0.00354    0.00025   -0.00298
AFIX  43
H2    2   -0.101305    0.166927    0.231537    11.00000   -1.20000
AFIX   0
C3    1   -0.103987    0.216675    0.396403    11.00000    0.02115    0.02467 =
         0.01913   -0.00134    0.00046   -0.00341
AFIX  43
H3    2   -0.239193    0.166800    0.408836    11.00000   -1.20000
AFIX   0
C4    1    0.057973    0.306055    0.477564    11.00000    0.01902    0.01790 =
         0.01924   -0.00145    0.00158    0.00092
C5    1    0.043288    0.331176    0.589265    11.00000    0.02069    0.01612 =
         0.01922    0.00177    0.00355    0.00216
C6    1   -0.137158    0.242534    0.628907    11.00000    0.01771    0.02050 =
         0.01586    0.00210    0.00170    0.00186
C7    1   -0.145434    0.109135    0.612110    11.00000    0.02282    0.01992 =
         0.02336   -0.00158    0.00544    0.00266
AFIX  43
H7    2   -0.035648    0.074885    0.577078    11.00000   -1.20000
AFIX   0
C8    1   -0.313693    0.025732    0.646376    11.00000    0.03054    0.02012 =
         0.02889   -0.00007    0.00140    0.00009
AFIX  43
H8    2   -0.319625   -0.065189    0.633854    11.00000   -1.20000
AFIX   0
C9    1   -0.471794    0.075330    0.698542    11.00000    0.02219    0.03457 =
         0.02377    0.00360    0.00312   -0.00560
AFIX  43
H9    2   -0.586873    0.018344    0.721587    11.00000   -1.20000
AFIX   0
C10   1   -0.463340    0.207681    0.717401    11.00000    0.01968    0.03678 =
         0.02273    0.00215    0.00612    0.00585
AFIX  43
H10   2   -0.571007    0.241669    0.754316    11.00000   -1.20000
AFIX   0
C11   1   -0.295994    0.291191    0.681995    11.00000    0.02374    0.02241 =
         0.02213    0.00252    0.00328    0.00760
AFIX  43
H11   2   -0.291034    0.382024    0.694402    11.00000   -1.20000
AFIX   0
C12   1    0.189593    0.424914    0.667200    11.00000    0.01980    0.01854 =
         0.01509    0.00034    0.00294    0.00416
C13   1    0.189065    0.440656    0.783531    11.00000    0.02629    0.02164 =
         0.01734    0.00141    0.00708    0.00266
AFIX  43
H13   2    0.084376    0.393687    0.820342    11.00000   -1.20000
AFIX   0
C14   1    0.366276    0.535239    0.830800    11.00000    0.02542    0.02297 =
         0.01230   -0.00075    0.00116    0.00324
AFIX  43
H14   2    0.407731    0.566351    0.906812    11.00000   -1.20000
AFIX   0
C15   1    0.479752    0.579762    0.745132    11.00000    0.02304    0.01687 =
         0.01167   -0.00220    0.00003    0.00514
C16   1    0.682906    0.668522    0.762470    11.00000    0.02309    0.01585 =
         0.01357   -0.00052   -0.00015    0.00536
C17   1    0.762042    0.739873    0.876382    11.00000    0.02109    0.01982 =
         0.01340   -0.00068    0.00225   -0.00154
C18   1    0.634596    0.820784    0.924535    11.00000    0.02883    0.02306 =
         0.01985   -0.00103    0.00217    0.00435
AFIX  43
H18   2    0.497726    0.830706    0.885147    11.00000   -1.20000
AFIX   0
C19   1    0.707348    0.887307    1.030449    11.00000    0.04361    0.02809 =
         0.02119   -0.00376    0.00863    0.00431
AFIX  43
H19   2    0.618420    0.941198    1.063404    11.00000   -1.20000
AFIX   0
C20   1    0.907941    0.875335    1.087758    11.00000    0.04579    0.03081 =
         0.01307   -0.00431    0.00072   -0.00929
AFIX  43
H20   2    0.958117    0.922005    1.159429    11.00000   -1.20000
AFIX   0
C21   1    1.034610    0.795653    1.040682    11.00000    0.02903    0.04347 =
         0.01943    0.00800   -0.00553   -0.00337
AFIX  43
H21   2    1.172643    0.787418    1.080017    11.00000   -1.20000
AFIX   0
C22   1    0.961796    0.726738    0.935456    11.00000    0.02552    0.03350 =
         0.02045    0.00194    0.00152    0.00465
AFIX  43
H22   2    1.049095    0.670620    0.904066    11.00000   -1.20000
AFIX   0
HKLF 4

REM  sp_tpp_thf_0m_a.res in P-1
REM R1 =  0.0246 for    3773 Fo > 4sig(Fo)  and  0.0249 for all    3774 data
REM    223 parameters refined using      0 restraints

END

WGHT      0.0290      0.0000

REM No hydrogen bonds found for HTAB generation

REM Highest difference peak  1.367,  deepest hole -1.006,  1-sigma level  0.133
Q1    1   0.4951  0.4185  0.4979  11.00000  0.05    1.37
Q2    1   0.4060  0.5121  0.4378  11.00000  0.05    1.04
Q3    1   0.4386  0.5613  0.4750  11.00000  0.05    1.01
Q4    1   0.4269  0.4818  0.5550  11.00000  0.05    0.93
Q5    1   0.3654  0.4548  0.4932  11.00000  0.05    0.83
Q6    1   0.2477  0.5468  0.5008  11.00000  0.05    0.71
Q7    1  -0.3723  0.2419  0.6981  11.00000  0.05    0.67
Q8    1   0.1448  0.3386  0.4612  11.00000  0.05    0.64
Q9    1  -0.0633  0.2788  0.6083  11.00000  0.05    0.62
Q10   1   0.1806  0.4219  0.7193  11.00000  0.05    0.58
Q11   1   0.8246  0.8828  1.0492  11.00000  0.05    0.52
Q12   1  -0.1306  0.1749  0.6375  11.00000  0.05    0.50
Q13   1  -0.2052  0.0727  0.6416  11.00000  0.05    0.50
Q14   1  -0.0079  0.2401  0.4484  11.00000  0.05    0.49
Q15   1   0.2090  0.3339  0.3732  11.00000  0.05    0.49
Q16   1  -0.4940  0.1381  0.6830  11.00000  0.05    0.47
Q17   1   0.2553  0.5063  0.8041  11.00000  0.05    0.45
Q18   1   0.0769  0.2582  0.3054  11.00000  0.05    0.45
Q19   1  -0.2079  0.2568  0.6722  11.00000  0.05    0.44
Q20   1  -0.1921  0.1635  0.6088  11.00000  0.05    0.44
;
_shelx_res_checksum   73318

_shelx_hkl_file
;
   8   0  -2  165.98   22.33
  -8   0   2  129.31   15.31
  -8   0   3  108.50   14.91
   8   0  -3  108.74   18.86
  -8   1   0  104.50   15.56
   8  -1   0  109.07   18.43
  -8   1   1   55.73   11.90
   8  -1  -1   57.68   14.22
   8  -1  -2  159.72   21.73
  -8   1   2  171.46   17.24
  -8   1   3  134.65   16.32
   8  -1  -3  148.86   20.71
  -8   1   4  115.34   15.62
   8  -1  -4  151.71   21.16
  -8   2   0  121.00   16.67
   8  -2   0   98.85   17.12
  -8   2   1  109.02   15.36
   8  -2  -1  111.24   18.70
   8  -2  -2   64.84   15.44
  -8   2   2   78.62   13.52
  -8   2   3  136.31   15.82
   8  -2  -3  135.57   19.85
  -8   2   4  139.63   16.87
   8  -2  -4  155.74   21.29
  -8   2   5  170.52   18.39
   8  -2  -5  179.19   20.49
  -8   3   0  223.98   20.78
   8  -3   0  207.80   22.26
   8  -3  -1  125.58   19.12
  -8   3   1  125.54   17.18
  -8   3   2   85.32   14.01
   8  -3  -2   96.21   17.94
  -8   3   3   68.88   12.87
   8  -3  -3   70.46   15.28
   8  -3  -4   38.29   12.94
  -8   3   4   34.82   10.82
  -8   4   0  149.64   18.24
   8  -4   0  139.65   20.80
  -8   4   1   43.12   12.16
   8  -4  -1   44.55   13.60
   8  -4  -2  140.66   20.17
  -8   4   2  119.36   16.91
   8  -4  -3   91.32   17.17
  -8   4   3   80.43   14.48
  -8   4   4   81.69   14.24
  -7  -4   1  133.89   19.36
  -7  -4   2  142.13   19.47
  -7  -4   3  178.07   19.91
  -7  -4   4  196.54   20.08
  -7  -4   5  154.35   18.31
  -7  -4   6   58.39   13.00
  -7  -4   6   49.29    9.55
  -7  -4   7   90.81   12.59
   7   4  -7  100.71   14.50
  -7  -4   7   90.13   14.99
  -7  -3   1   88.65    9.93
   7   3  -1  129.26   19.46
  -7  -3   2  107.48   11.15
   7   3  -2  119.57   17.61
  -7  -3   3  161.90   13.40
   7   3  -3  185.27   20.01
   7   3  -4  193.67   21.28
  -7  -3   4  191.45   15.05
  -7  -3   5  177.53   14.79
   7   3  -5  198.39   19.99
   7   3  -6   84.80   14.85
  -7  -3   6  101.25   13.43
  -7  -3   7  119.66   13.94
   7   3  -7  161.64   18.85
  -7  -3   8   33.07    9.67
   7   3  -8   39.85   11.73
   7   2  -1  189.85   19.74
  -7  -2   1  149.80   13.10
  -7  -2   2  126.82   12.61
   7   2  -2  130.84   18.07
  -7  -2   3  159.87   14.09
   7   2  -3  171.47   19.04
   7   2  -4  151.17   18.25
  -7  -2   4  129.98   13.46
  -7  -2   5   52.78   10.27
   7   2  -5   60.69   13.19
  -7  -2   6  309.76   19.30
   7   2  -6  350.22   23.65
  -7  -2   7  125.16   14.68
   7   2  -7  154.16   17.31
  -7  -2   8  157.33   16.38
   7   2  -8  198.27   18.16
  -7  -2   9  129.12   15.96
   7   2  -9  142.70   16.70
   7   1  -1  157.99   17.15
  -7  -1   1  148.86   13.81
   7   1  -2  138.21   17.27
  -7  -1   2  118.98   12.90
   7   1  -3  224.20   20.16
  -7  -1   3  211.11   16.00
  -7  -1   4  171.00   15.22
   7   1  -4  177.96   18.55
  -7  -1   5  154.76   15.32
   7   1  -5  183.11   18.67
  -7  -1   6  193.79   16.74
   7   1  -6  208.96   19.78
  -7  -1   7  126.63   15.24
   7   1  -7  122.18   16.44
  -7  -1   8  147.11   15.90
   7   1  -8  170.80   17.50
  -7  -1   9  220.19   18.75
  -7   0   1  223.86   15.87
   7   0  -1  224.64   20.09
   7   0  -2  207.81   19.41
  -7   0   2  218.02   15.85
   7   0  -3  264.71   20.95
  -7   0   3  249.51   16.97
   7   0  -4   98.53   15.76
  -7   0   4   88.83   12.81
   7   0  -5  255.84   21.06
  -7   0   5  214.51   17.51
   7   0  -6  143.92   17.48
  -7   0   6  137.25   15.69
  -7   0   7  213.06   18.51
   7   0  -7  204.73   18.79
  -7   0   8  127.34   16.75
   7   0  -8  114.43   15.06
  -7   0   9  117.68   16.21
  -7   0  10  163.66   17.90
   7  -1   0  321.55   23.02
  -7   1   0  313.71   18.86
   7  -1  -1  154.67   17.66
  -7   1   1  142.31   13.96
   7  -1  -2  136.97   18.30
  -7   1   2  120.02   13.24
  -7   1   3  106.91   13.02
   7  -1  -3  126.10   17.20
   7  -1  -4  156.73   17.45
  -7   1   4  127.35   14.19
   7  -1  -5   53.64   12.48
  -7   1   5   57.19   11.22
   7  -1  -6  227.57   19.46
  -7   1   6  200.12   18.00
   7  -1  -7  329.63   21.14
  -7   1   7  321.94   21.79
  -7   1   8  182.97   18.12
   7  -1  -8  208.59   17.63
  -7   1   9  124.27   17.51
  -7   1  10   98.49   16.24
   7  -2   0  391.29   24.47
  -7   2   0  400.48   21.54
   7  -2  -1  176.50   18.53
  -7   2   1  180.94   15.54
  -7   2   2   71.36   11.74
   7  -2  -2   84.79   14.89
   7  -2  -3  144.69   17.07
  -7   2   3  143.16   14.38
  -7   2   4  168.26   15.49
   7  -2  -4  229.11   19.52
  -7   2   5  120.20   14.58
   7  -2  -5  128.62   16.83
   7  -2  -6  190.75   17.68
  -7   2   6  188.17   17.40
   7  -2  -7  169.68   16.34
  -7   2   7  158.96   16.85
   7  -2  -8  110.54   14.57
  -7   2   8   96.30   15.48
  -7   2   9  151.68   19.27
  -7   2  10  119.33   17.38
   7  -3   0  239.48   20.75
  -7   3   0  206.77   17.15
   7  -3  -1  108.79   16.45
  -7   3   1   84.19   12.67
  -7   3   2  102.79   13.66
   7  -3  -2   91.00   14.19
   7  -3  -3  254.32   20.39
  -7   3   3  239.43   17.38
  -7   3   4  167.42   16.10
   7  -3  -4  208.02   18.79
   7  -3  -5  218.01   18.70
  -7   3   5  190.43   16.88
   7  -3  -6  315.88   21.04
  -7   3   6  313.57   20.94
   7  -3  -7  149.42   15.98
  -7   3   7  146.16   16.89
   7  -3  -8   89.30   13.05
  -7   3   8  116.71   17.09
  -7   3   9   57.38   13.35
   7  -4   0  105.00   15.70
  -7   4   0  124.20   15.95
  -7   4   1  193.10   16.84
   7  -4  -1  201.40   19.10
  -7   4   2  281.26   18.94
   7  -4  -2  315.90   22.57
  -7   4   3  242.32   17.83
   7  -4  -3  289.65   21.46
   7  -4  -4   83.29   13.69
  -7   4   4   77.10   12.90
   7  -4  -5  125.60   16.09
  -7   4   5  113.20   15.11
   7  -4  -6  247.30   19.16
  -7   4   6  229.97   18.77
  -7   4   7  271.75   21.24
   7  -4  -7  290.58   19.91
  -7   4   8  203.06   19.80
   7  -4  -8  177.89   15.91
  -7   4   9   89.32   15.43
  -7   5   0  137.24   16.41
   7  -5   0  133.83   18.11
   7  -5  -1  248.40   20.99
  -7   5   1  224.00   18.32
  -7   5   2  236.26   18.21
   7  -5  -2  241.89   20.67
   7  -5  -3  173.85   18.38
  -7   5   3  148.78   15.47
   7  -5  -4   72.74   13.82
  -7   5   4   75.32   12.63
   7  -5  -5  187.00   17.89
  -7   5   5  209.96   17.64
  -7   5   6  260.98   19.93
   7  -5  -6  255.52   19.32
   7  -5  -7  312.93   20.23
  -7   5   7  312.50   21.91
  -7   5   8  177.50   18.74
   7  -6   0  369.65   24.79
  -7   6   0  362.65   23.56
   7  -6  -1  238.69   20.89
  -7   6   1  219.90   18.99
  -7   6   2  187.04   17.49
   7  -6  -2  162.01   18.50
   7  -6  -3   53.48   13.06
  -7   6   3   44.59   10.68
  -7   6   4  127.69   15.38
   7  -6  -4  143.07   17.82
   7  -6  -5  116.88   16.30
  -7   6   5  131.67   15.79
   7  -6  -6  149.02   16.34
  -7   6   6  153.30   17.78
   7  -6  -7  127.96   15.66
  -7   6   7  104.87   15.58
  -7   7   0  204.19   20.18
   7  -7   0  219.28   20.99
  -7   7   1  232.44   20.12
   7  -7  -1  266.61   22.33
   7  -7  -2  144.17   19.02
  -7   7   2  138.54   16.56
   7  -7  -3  122.86   17.35
  -7   7   3  106.24   15.38
   7  -7  -4  111.81   16.32
  -7   7   4  110.53   15.96
   7  -7  -5  142.94   18.62
  -7   7   5  116.02   16.18
  -7   7   6   68.25   13.74
   7  -7  -6   72.06   13.87
   7  -8   0   97.43   16.86
  -7   8   0  113.41   17.76
   7  -8  -1  116.73   17.70
  -7   8   1  132.54   17.91
  -7   8   2   76.45   13.75
   7  -8  -2   74.68   15.05
  -7   8   3  119.54   16.37
   7  -8  -3  130.34   18.79
  -7   8   4   48.68   11.72
   7  -8  -4   50.60   13.03
   7  -8  -5   99.70   16.23
  -7   8   5   91.70   15.13
   7  -9   0   90.07   16.76
  -7   9   0  148.78   20.39
  -7   9   1   83.88   15.76
   7  -9  -1   61.29   14.79
   6   7  -1  212.27   17.39
  -6  -7   1  185.82   20.81
  -6  -7   2  189.95   20.89
   6   7  -2  206.20   17.27
  -6  -7   3   93.11   16.76
   6   7  -3  134.43   15.36
   6   7  -4  144.28   16.21
  -6  -7   4  120.73   18.45
   6   7  -5  211.47   17.95
  -6  -7   5  223.40   20.69
   6   7  -6  217.95   19.36
  -6  -7   6  155.85   18.08
   6   6  -1  144.08   14.14
  -6  -6   1  159.81   20.65
   6   6  -2  170.45   15.25
  -6  -6   2  156.86   18.81
   6   6  -3  215.67   16.90
  -6  -6   3  178.68   18.16
  -6  -6   4  188.77   19.08
   6   6  -4  218.65   16.90
   6   6  -5  251.25   18.28
  -6  -6   5  204.71   19.33
  -6  -6   6  127.33   17.09
   6   6  -6  146.35   16.04
  -6  -6   7   99.65   15.16
   6   6  -7  144.64   16.99
   6   6  -8  109.57   15.75
  -6  -6   8   86.91   13.87
   6   5  -1  145.45   13.43
  -6  -5   1  141.42   18.59
  -6  -5   2  151.11   17.66
   6   5  -2  164.40   13.97
  -6  -5   3  135.40   16.61
   6   5  -3  156.12   13.81
  -6  -5   4  232.93   19.64
   6   5  -4  261.45   16.58
  -6  -5   5  169.91   17.32
   6   5  -5  182.82   15.46
  -6  -5   5  129.82   14.83
   6   5  -6  131.89   12.84
  -6  -5   6  118.53   15.69
   6   5  -6  128.46   14.59
  -6  -5   7  153.55   16.71
   6   5  -7  203.41   17.80
   6   5  -7  167.72   15.09
  -6  -5   8  107.48   14.58
   6   5  -8  107.42   14.04
  -6  -5   8  102.55   14.56
  -6  -5   9  112.17   15.49
   6   5  -9  108.64   14.81
  -6  -5   9   93.02   13.93
   6   5 -10  159.22   16.52
  -6  -5  10  172.58   18.39
  -6  -4   1  167.49   10.88
  -6  -4   1  205.30   18.91
   6   4  -1  229.25   14.34
   6   4  -2  226.00   14.09
  -6  -4   2  185.08   11.62
  -6  -4   2  204.79   18.84
  -6  -4   3  200.51   12.68
  -6  -4   3  206.77   18.48
   6   4  -3  226.71   14.24
  -6  -4   4  212.74   18.59
   6   4  -4  212.13   14.39
  -6  -4   4  208.73   13.23
   6   4  -5  138.17   12.96
  -6  -4   5  140.71   15.70
  -6  -4   5  119.77   11.12
  -6  -4   6  150.80   15.71
  -6  -4   6  168.97   13.17
   6   4  -6  178.10   14.91
  -6  -4   7  305.03   17.72
  -6  -4   7  328.03   19.01
  -6  -4   7  319.19   20.46
  -6  -4   8  171.37   16.07
   6   4  -8  178.77   15.50
  -6  -4   8  180.84   16.24
  -6  -4   9  162.94   15.47
   6   4  -9  160.16   16.01
  -6  -4   9  177.20   17.02
   6   4 -10  174.75   16.53
  -6  -4  10  146.43   16.91
   6   4 -11   44.10   11.30
  -6  -4  11   41.22   11.55
  -6  -3   1  282.99   19.92
  -6  -3   1  300.41   14.72
   6   3  -1  331.18   15.23
  -6  -3   2  168.34   12.12
  -6  -3   2  174.05   17.16
   6   3  -2  194.35   12.36
   6   3  -3  251.98   13.73
  -6  -3   3  229.13   18.77
  -6  -3   3  247.51   14.22
  -6  -3   4  391.25   22.72
   6   3  -4  395.11   17.07
  -6  -3   4  349.91   16.81
  -6  -3   5  153.92   12.59
  -6  -3   5  154.95   15.81
   6   3  -5  161.90   12.89
  -6  -3   6  267.56   18.80
  -6  -3   6  277.62   16.39
  -6  -3   6  290.82   16.29
  -6  -3   7  121.09   12.82
  -6  -3   7  127.55   12.96
  -6  -3   7  131.24   14.14
  -6  -3   8  155.88   14.79
  -6  -3   8  162.84   15.32
  -6  -3   8  150.47   14.29
   6   3  -9  217.94   17.00
  -6  -3   9  247.38   18.31
   6   3  -9  260.16   18.59
   6   3 -10  295.85   20.49
  -6  -3  10  295.53   20.34
  -6  -3  11  178.12   17.76
   6   3 -11  169.28   17.61
  -6  -2   1  426.92   17.77
   6   2  -1  459.45   16.02
  -6  -2   1  399.56   22.30
   6   2  -2  311.26   13.68
  -6  -2   2  267.52   19.38
  -6  -2   2  316.04   15.90
   6   2  -3  355.90   14.55
  -6  -2   3  298.57   19.76
  -6  -2   3  348.43   17.03
  -6  -2   4  215.68   14.11
   6   2  -4  217.07   12.33
  -6  -2   4  190.43   16.65
  -6  -2   5  164.85   13.06
   6   2  -5  175.01   12.25
  -6  -2   6  137.58   11.71
   6   2  -6  141.08   15.19
  -6  -2   6  143.56   13.29
  -6  -2   7  239.62   16.11
  -6  -2   7  229.18   15.26
   6   2  -7  264.01   19.06
  -6  -2   8  207.28   15.87
   6   2  -8  231.61   17.58
  -6  -2   8  222.79   16.18
   6   2  -9  184.16   15.49
  -6  -2   9  162.83   15.84
  -6  -2   9  186.29   15.55
   6   2 -10  169.54   17.11
  -6  -2  10  145.80   15.35
  -6  -2  11  183.03   17.02
   6   2 -11  189.42   18.61
   6   2 -12  210.56   19.72
  -6  -2  12  211.35   18.36
  -6  -1   1  368.07   17.22
   6   1  -1  384.40   21.38
   6   1  -2  118.31   14.47
  -6  -1   2   93.90   10.53
   6   1  -2  106.92    9.35
   6   1  -3  161.34   15.83
  -6  -1   3  150.62   12.85
   6   1  -3  167.33    9.76
   6   1  -4  171.51   16.26
  -6  -1   4  152.43   12.90
   6   1  -4  149.77    9.89
  -6  -1   5  274.49   16.77
  -6  -1   5  312.30   13.97
   6   1  -5  346.56   20.63
   6   1  -6  134.69   14.44
  -6  -1   6   98.68   12.76
  -6  -1   6  115.23   10.50
  -6  -1   7  411.42   18.58
   6   1  -7  422.84   21.94
  -6  -1   7  367.50   19.73
   6   1  -8  303.47   18.57
  -6  -1   8  286.30   18.47
  -6  -1   8  295.83   17.19
   6   1  -9  184.34   14.88
  -6  -1   9  162.87   15.71
  -6  -1   9  187.73   15.13
  -6  -1  10  171.68   15.43
  -6  -1  11   85.43   13.26
   6   1 -11   84.04   13.99
   6   1 -12  188.86   19.23
  -6  -1  12  192.10   17.33
   6   0  -1  583.89   25.29
  -6   0   1  586.23   21.37
  -6   0   2  304.50   16.48
   6   0  -2  322.05   20.00
   6   0  -3   38.93    9.99
  -6   0   3   39.24    8.54
   6   0  -4  317.75   14.22
   6   0  -4  307.86   19.40
  -6   0   4  310.86   17.56
  -6   0   5   95.31   12.60
  -6   0   5   63.53    7.04
   6   0  -5  101.95   13.73
   6   0  -6  358.57   20.26
  -6   0   6  348.28   19.32
  -6   0   6  328.49   14.77
  -6   0   7  354.10   20.01
  -6   0   7  354.29   16.66
   6   0  -7  377.79   20.26
  -6   0   8  200.82   16.51
   6   0  -8  218.42   15.62
  -6   0   8  216.98   14.34
  -6   0   9  153.54   13.40
  -6   0   9  152.61   15.58
   6   0  -9  170.64   13.41
  -6   0  10  153.31   16.34
  -6   0  10  127.27   12.98
  -6   0  11  194.68   15.82
   6   0 -11  222.97   20.41
   6   0 -12  128.93   17.81
  -6   0  12  121.89   14.37
  -6   1   0   84.08   10.95
   6  -1   0   91.02   13.65
   6  -1  -1  140.92   14.85
  -6   1   1  149.51   12.98
   6  -1  -2  221.99   17.01
  -6   1   2  196.32   13.96
  -6   1   3  579.34   22.36
   6  -1  -3  582.66   25.31
  -6   1   4  589.74   23.28
   6  -1  -4  610.32   25.59
  -6   1   5  135.53   13.71
   6  -1  -5  166.34   14.72
   6  -1  -6  224.40   16.20
  -6   1   6  172.63   10.61
  -6   1   6  231.84   17.07
  -6   1   7  274.29   14.14
  -6   1   7  312.86   19.36
   6  -1  -7  324.59   18.51
   6  -1  -8  296.99   17.40
  -6   1   8  238.28   14.28
  -6   1   8  263.83   18.85
  -6   1   9  159.96   16.33
  -6   1   9  149.58   12.59
  -6   1  10   69.05   10.76
  -6   1  10   65.65   12.60
  -6   1  11  186.84   18.55
  -6   1  11  154.76   14.20
  -6   1  12  142.33   14.78
   6  -1 -12  142.00   18.78
  -6   2   0  261.67   16.40
   6  -2   0  262.61   18.63
   6  -2  -1  305.30   19.44
  -6   2   1  269.25   15.95
   6  -2  -2  153.38   15.04
  -6   2   2  132.29   12.60
  -6   2   3  610.44   23.08
   6  -2  -3  656.34   26.53
   6  -2  -4  177.83   15.50
  -6   2   4  192.28   15.03
  -6   2   5  210.32   16.09
   6  -2  -5  208.72   15.98
  -6   2   6  212.14   16.63
   6  -2  -6  196.04   15.23
  -6   2   7  444.59   22.84
   6  -2  -7  485.46   21.68
  -6   2   8  576.30   26.27
  -6   2   8  442.95   17.96
   6  -2  -8  599.20   22.85
  -6   2   9  179.87   12.82
  -6   2   9  242.37   19.15
  -6   2  10  197.98   18.60
  -6   2  10  126.32   12.08
  -6   2  11   48.39    9.76
  -6   2  11   60.88   13.08
   6  -2 -12  101.64   17.11
  -6   2  12   80.87   12.67
   6  -3   0  346.11   20.85
  -6   3   0  335.37   18.26
   6  -3  -1  330.22   20.14
  -6   3   1  293.95   16.92
  -6   3   2  600.64   23.01
   6  -3  -2  664.30   27.00
  -6   3   3  252.78   16.21
   6  -3  -3  246.10   17.77
   6  -3  -4  219.75   16.59
  -6   3   4  177.00   14.77
  -6   3   5  204.38   16.13
   6  -3  -5  182.55   15.15
  -6   3   6  330.36   19.82
   6  -3  -6  345.12   18.87
   6  -3  -7  380.55   19.38
  -6   3   7  402.15   22.22
   6  -3  -8  258.80   15.82
  -6   3   8  256.98   19.43
  -6   3   9  162.50   13.49
  -6   3   9  229.68   18.94
  -6   3  10  127.33   11.75
  -6   3  10  190.54   18.58
  -6   3  11   85.69   11.94
  -6   3  11  141.75   18.74
   6  -3 -12  103.92   16.90
  -6   3  12   71.10   11.66
   6  -4   0  377.68   21.89
  -6   4   0  351.94   19.34
   6  -4  -1  519.12   24.70
  -6   4   1  500.50   21.63
   6  -4  -2  496.33   23.96
  -6   4   2  453.06   20.61
   6  -4  -3  147.05   15.06
  -6   4   3  137.33   13.34
  -6   4   4  135.65   13.70
   6  -4  -4  145.59   14.64
  -6   4   5  232.80   16.90
   6  -4  -5  232.44   17.17
  -6   4   6  314.73   19.74
   6  -4  -6  309.45   18.43
  -6   4   7  246.33   18.70
   6  -4  -7  238.34   16.09
   6  -4  -8  122.30   12.25
  -6   4   8  106.85   15.04
  -6   4   9  223.54   19.08
  -6   4  10  145.55   17.38
  -6   4  11  127.45   17.74
  -6   4  11   66.08   14.70
   6  -5   0  186.59   16.95
  -6   5   0  189.78   15.93
  -6   5   1  449.62   21.32
   6  -5  -1  475.86   23.59
   6  -5  -2  333.11   20.61
  -6   5   2  329.89   18.64
  -6   5   3  315.56   18.17
   6  -5  -3  335.45   20.46
   6  -5  -4  175.62   16.00
  -6   5   4  173.73   15.08
  -6   5   5   91.67   13.29
   6  -5  -5  109.47   14.27
   6  -5  -6  132.03   13.65
  -6   5   6  104.96   14.20
  -6   5   7   54.72   11.51
   6  -5  -7   59.88   10.47
   6  -5  -8  131.61   12.97
  -6   5   8  151.62   16.60
  -6   5   9  238.05   19.83
  -6   5  10  171.31   18.52
  -6   5  11  154.01   19.70
  -6   6   0  207.37   17.04
   6  -6   0  177.52   16.33
   6  -6  -1  144.06   15.01
  -6   6   1  138.42   14.47
  -6   6   2  147.51   14.46
   6  -6  -2  175.10   16.77
   6  -6  -3  241.93   18.36
  -6   6   3  224.87   16.43
   6  -6  -4  210.00   17.27
  -6   6   4  204.49   16.30
   6  -6  -5  190.90   16.14
  -6   6   5  194.24   16.42
  -6   6   6  167.73   16.22
   6  -6  -6  149.20   14.50
  -6   6   7  105.59   14.78
   6  -6  -7  111.17   13.16
   6  -6  -8  198.18   15.22
  -6   6   8  213.68   18.75
  -6   6   9  276.02   21.16
  -6   6  10   69.14   14.12
  -6   7   0  173.71   16.38
   6  -7   0  179.25   17.88
   6  -7  -1  170.94   17.35
  -6   7   1  153.28   15.24
   6  -7  -2  179.55   17.44
  -6   7   2  134.01   14.70
  -6   7   3  164.73   15.26
   6  -7  -3  184.25   17.10
  -6   7   4  108.84   14.59
   6  -7  -4  117.28   15.82
   6  -7  -5  241.41   18.39
  -6   7   5  265.80   18.80
   6  -7  -6  278.09   19.20
  -6   7   6  258.88   19.36
  -6   7   7  182.68   17.76
   6  -7  -7  190.10   16.24
   6  -7  -8  258.20   26.18
  -6   7   8  264.18   20.58
  -6   7   9  235.05   20.41
   6  -8   0  177.34   18.21
  -6   8   0  197.92   17.86
  -6   8   1  110.46   14.64
   6  -8  -1  119.39   16.20
   6  -8  -2  291.94   21.34
  -6   8   2  268.10   18.83
   6  -8  -3  232.06   19.49
  -6   8   3  211.40   17.12
  -6   8   4  185.83   16.85
   6  -8  -4  192.25   18.37
  -6   8   5  217.05   18.20
   6  -8  -5  211.33   18.19
   6  -8  -6  226.07   18.10
  -6   8   6  201.80   18.34
   6  -8  -7  165.78   16.33
  -6   8   7  180.39   18.01
  -6   8   8  125.29   16.78
   6  -9   0  184.79   19.07
  -6   9   0  188.46   17.96
   6  -9  -1  148.61   17.74
  -6   9   1  160.28   16.71
  -6   9   2  146.98   15.68
   6  -9  -2  164.86   18.46
  -6   9   3  120.25   15.57
   6  -9  -3  141.17   17.47
   6  -9  -4  171.81   18.91
  -6   9   4  135.30   16.39
   6  -9  -5  205.80   19.53
  -6   9   5  195.38   18.03
   6  -9  -6  220.31   19.66
  -6   9   6  196.91   18.48
   6  -9  -7  146.55   16.67
  -6   9   7  139.42   16.94
  -6  10   0  212.32   19.25
   6 -10   0  207.94   21.09
  -6  10   1  261.25   20.79
   6 -10  -1  256.78   22.49
  -6  10   2  116.04   16.08
   6 -10  -2  112.52   17.27
  -6  10   3   63.72   12.68
   6 -10  -3   68.19   14.66
   6 -10  -4   38.90   11.86
  -6  10   4   58.82   12.68
   6 -10  -5  119.90   17.44
  -6  10   5  124.03   16.70
  -6  11   0  195.53   19.77
   6 -11   0  175.79   19.70
  -6  11   1  108.08   15.79
   6 -11  -1  133.06   20.41
   5   9  -1  184.53   18.51
  -5  -9   1  173.33   18.95
  -5  -9   2  222.26   21.74
   5   9  -2  229.52   19.44
   5   9  -3  233.61   19.75
  -5  -9   3  224.03   21.93
  -5  -9   4  170.81   22.20
   5   9  -4  183.75   18.51
   5   9  -5  136.38   17.11
  -5  -9   5  112.14   17.81
  -5  -9   6  212.94   20.77
   5   9  -6  255.03   22.14
  -5  -8   1   91.53   15.07
   5   8  -1   97.15   13.61
  -5  -8   2  140.05   19.21
   5   8  -2  167.78   16.97
  -5  -8   3  163.72   18.70
   5   8  -3  189.53   17.28
  -5  -8   4  193.70   19.41
   5   8  -4  249.26   19.52
  -5  -8   5  249.69   21.00
   5   8  -5  258.05   20.24
   5   8  -6  176.43   18.08
  -5  -8   6  116.91   15.94
   5   8  -7  155.77   18.17
  -5  -8   7  126.30   17.05
  -5  -8   8  119.68   14.84
   5   8  -8  150.55   18.60
  -5  -8   9   66.59   12.38
   5   8  -9   89.19   15.90
   5   7  -1  182.98   15.85
  -5  -7   1  151.15   16.60
   5   7  -2  179.42   15.95
  -5  -7   2  182.33   18.53
  -5  -7   3  166.47   17.73
   5   7  -3  150.45   14.66
   5   7  -4  194.31   15.98
  -5  -7   4  140.66   16.30
   5   7  -5  298.54   19.53
  -5  -7   5  256.03   19.88
  -5  -7   6  111.07   15.40
   5   7  -6  113.06   14.82
   5   7  -7  173.89   17.50
  -5  -7   7  154.31   16.19
  -5  -7   8  146.81   16.04
  -5  -7   8  113.47   14.80
  -5  -7   9  157.39   17.24
  -5  -7   9  125.96   14.20
  -5  -7  10  154.73   18.72
  -5  -7  10  112.44   13.11
  -5  -6   1  208.10   17.75
   5   6  -1  211.22   14.99
  -5  -6   2  290.02   20.96
   5   6  -2  326.50   18.06
   5   6  -3  193.36   14.46
  -5  -6   3  185.30   17.41
   5   6  -4  345.88   18.43
  -5  -6   4  309.80   20.79
  -5  -6   5  157.65   15.86
   5   6  -5  188.41   15.59
  -5  -6   6  174.42   15.79
   5   6  -6  219.34   16.74
   5   6  -6  199.04   13.94
  -5  -6   7  250.22   17.55
  -5  -6   7  212.58   16.70
   5   6  -7  258.48   16.06
  -5  -6   8  241.13   17.11
   5   6  -8  255.68   17.20
  -5  -6   8  266.75   19.11
   5   6  -9  104.96   14.33
  -5  -6   9  103.50   14.95
  -5  -6   9   98.55   13.21
   5   6 -10  203.58   17.47
  -5  -6  10  178.58   14.49
  -5  -6  10  225.65   19.98
   5   6 -11  195.10   17.67
  -5  -6  11  195.53   19.97
   5   5  -1  351.84   17.11
  -5  -5   1  304.16   20.48
   5   5  -2  269.28   15.30
  -5  -5   2  253.62   18.17
  -5  -5   2  220.53   10.76
  -5  -5   3  231.29   17.95
  -5  -5   3  231.72   11.75
   5   5  -3  263.39   15.44
  -5  -5   4  412.99   22.36
  -5  -5   4  435.13   16.55
   5   5  -4  456.46   19.59
   5   5  -5  361.76   18.70
  -5  -5   5  332.31   19.96
  -5  -5   6  218.67   15.63
   5   5  -6  230.71   14.60
  -5  -5   6  199.92   16.53
  -5  -5   7  172.56   14.85
  -5  -5   7  181.45   15.43
   5   5  -7  163.17   13.76
   5   5  -8  184.89   14.96
  -5  -5   8  159.42   14.45
  -5  -5   8  185.52   16.53
  -5  -5   9  120.15   12.82
   5   5  -9  141.87   14.43
  -5  -5   9  128.94   14.94
  -5  -5  10  266.69   16.47
   5   5 -10  370.51   21.68
  -5  -5  10  391.28   23.48
   5   5 -11  225.35   18.88
  -5  -5  11  232.70   19.58
  -5  -5  12  157.38   17.61
   5   5 -12  142.49   17.12
   5   4  -1  874.24   24.27
  -5  -4   1  821.69   20.77
  -5  -4   1  829.45   30.39
  -5  -4   2  441.59   15.49
   5   4  -2  501.97   18.46
  -5  -4   2  462.71   23.12
   5   4  -3  361.61   16.10
  -5  -4   3  327.99   13.94
  -5  -4   3  346.94   20.22
  -5  -4   4  156.66   14.79
  -5  -4   4  177.91   11.27
   5   4  -4  190.95   13.11
  -5  -4   5  209.05   12.70
  -5  -4   5  210.50   16.08
  -5  -4   6  105.88   10.58
  -5  -4   6  138.03   12.68
  -5  -4   6  110.90   12.98
  -5  -4   7  276.50   17.37
   5   4  -7  273.33   16.15
  -5  -4   7  284.34   17.45
  -5  -4   8  264.90   17.92
   5   4  -8  240.42   16.23
  -5  -4   8  266.19   16.95
  -5  -4   9  297.91   17.28
   5   4  -9  301.88   18.78
  -5  -4   9  318.29   19.92
  -5  -4  10  112.14   11.18
   5   4 -10  145.80   15.02
  -5  -4  10  159.93   16.17
  -5  -4  11  208.16   18.16
   5   4 -11  200.91   18.07
  -5  -4  12  209.79   19.11
   5   4 -12  220.96   19.70
  -5  -4  13  291.03   22.13
   5   4 -13  219.60   20.00
   5   3  -1  621.22   18.85
  -5  -3   1  536.83   17.20
  -5  -3   1  519.34   23.69
   5   3  -2  608.51   18.69
  -5  -3   2  577.51   18.22
  -5  -3   2  591.00   24.71
  -5  -3   3  183.02   11.28
   5   3  -3  171.27   11.22
  -5  -3   3  168.14   14.77
  -5  -3   4  221.81   12.44
  -5  -3   4  198.74   15.41
   5   3  -4  232.22   13.04
  -5  -3   5  234.12   13.56
  -5  -3   5  224.80   13.11
  -5  -3   5  247.03   16.51
  -5  -3   6  174.78   13.08
  -5  -3   6  201.63   15.22
  -5  -3   6  181.27   12.58
  -5  -3   7  281.06   17.05
  -5  -3   7  248.79   15.10
  -5  -3   7  300.81   17.18
  -5  -3   8  418.75   20.76
   5   3  -8  373.40   19.19
  -5  -3   8  401.48   19.40
  -5  -3   9  296.83   16.47
   5   3  -9  279.17   17.67
  -5  -3   9  260.85   17.81
   5   3 -10  177.67   15.81
  -5  -3  10  183.26   16.07
   5   3 -11  155.07   16.64
  -5  -3  11  159.88   15.65
   5   3 -12  128.28   16.01
  -5  -3  12  116.17   15.62
  -5  -3  13  156.62   16.87
   5   3 -13  163.22   18.43
  -5  -2   1  468.15   16.43
  -5  -2   1  499.76   22.35
   5   2  -1  533.55   16.00
  -5  -2   2  431.06   20.77
   5   2  -2  465.48   15.10
  -5  -2   2  426.45   16.03
  -5  -2   3  199.95   12.14
   5   2  -3  186.29   10.61
  -5  -2   3  191.88   14.91
  -5  -2   4  299.86   14.68
  -5  -2   4  289.78   13.14
  -5  -2   4  279.14   17.01
  -5  -2   5  342.95   15.79
  -5  -2   5  329.03   17.77
  -5  -2   5  331.97   14.91
  -5  -2   6  218.72   13.42
  -5  -2   6  217.99   14.78
  -5  -2   6  216.56   13.84
  -5  -2   7  348.77   17.86
  -5  -2   7  362.75   17.68
  -5  -2   7  338.73   17.19
  -5  -2   8  537.26   22.18
  -5  -2   8  510.76   21.44
   5   2  -8  590.45   22.50
   5   2  -9  218.93   14.41
  -5  -2   9  202.32   15.51
   5   2  -9  208.61   15.88
  -5  -2  10  212.07   16.36
   5   2 -10  207.75   17.20
   5   2 -11  161.47   16.28
  -5  -2  11  147.68   15.03
   5   2 -12  127.39   16.82
  -5  -2  12  151.17   15.87
  -5  -2  13  143.84   16.07
   5   2 -13  159.80   18.38
   5   2 -14   37.66   12.19
  -5  -1   1  229.14   12.57
   5   1  -1  238.12    9.95
  -5  -1   1  215.11   15.23
  -5  -1   2  233.50   15.59
   5   1  -2  212.22    9.58
  -5  -1   2  211.75   12.26
  -5  -1   3  469.05   20.59
   5   1  -3  475.31   14.55
  -5  -1   3  452.50   17.43
  -5  -1   4 1324.67   33.99
  -5  -1   4 1385.62   31.22
  -5  -1   4 1425.86   28.53
   5   1  -5  603.53   23.22
  -5  -1   5  549.73   20.49
  -5  -1   5  562.87   18.25
  -5  -1   6   96.00   10.68
   5   1  -6  120.57   11.90
  -5  -1   6  121.57   10.61
  -5  -1   7  156.81   12.04
  -5  -1   7  152.31   12.76
   5   1  -7  155.68   12.85
  -5  -1   8  321.80   17.79
   5   1  -8  379.08   17.27
  -5  -1   8  360.01   17.77
  -5  -1   9  518.87   23.24
  -5  -1   9  515.64   21.80
   5   1  -9  538.73   19.45
  -5  -1  10  245.30   16.64
   5   1 -10  268.18   18.54
   5   1 -11  147.80   16.12
  -5  -1  11  145.80   14.52
  -5  -1  12  163.30   15.48
   5   1 -12  191.27   18.76
   5   1 -13  167.54   18.69
  -5  -1  13  131.29   15.61
  -5  -1  14  123.76   16.88
   5   1 -14  152.43   20.44
   5   0  -1  541.37   12.47
   5   0  -1  527.34   21.61
  -5   0   1  477.00   17.65
  -5   0   2  258.32   13.62
   5   0  -2  262.94   15.98
   5   0  -2  274.40    9.53
  -5   0   3  364.26   11.62
   5   0  -3  384.88   18.51
  -5   0   3  349.50   15.95
   5   0  -4  515.78   20.83
  -5   0   4  492.45   19.22
  -5   0   4  500.89   15.09
   5   0  -5  413.17   18.65
  -5   0   5  401.57   18.05
  -5   0   5  433.03   15.38
  -5   0   6  456.09   19.61
  -5   0   6  484.33   17.54
   5   0  -6  467.94   19.46
  -5   0   7  601.23   22.89
  -5   0   7  632.97   21.10
   5   0  -7  638.32   21.74
  -5   0   8  504.22   19.92
   5   0  -8  567.18   19.94
  -5   0   8  503.16   21.86
  -5   0   9  424.68   19.30
  -5   0   9  434.41   21.42
   5   0  -9  461.87   17.29
  -5   0  10  239.74   16.05
  -5   0  11  148.79   14.35
   5   0 -11  167.89   16.87
   5   0 -12  136.26   16.77
  -5   0  12  124.55   14.40
   5   0 -13   94.32   15.95
  -5   0  13   85.00   13.58
  -5   0  14  147.79   16.76
   5   0 -14  163.62   19.84
   5  -1   0  270.69   16.32
   5  -1   0  240.95    6.57
  -5   1   0  227.48   13.02
  -5   1   1  764.65   22.11
   5  -1  -1  834.30   12.68
   5  -1  -1  837.55   26.03
   5  -1  -2  939.78   27.63
  -5   1   2  880.63   24.11
   5  -1  -2  922.25   15.60
  -5   1   3 1215.31   29.18
  -5   1   3 1207.94   21.03
   5  -1  -3 1258.69   31.91
  -5   1   4  168.40    8.57
   5  -1  -4  185.98   13.33
  -5   1   4  167.19   12.76
   5  -1  -5  133.04   11.67
  -5   1   5  119.31   12.06
  -5   1   5  126.44    8.78
  -5   1   6  271.18   16.33
   5  -1  -6  257.81   14.63
  -5   1   6  267.59   12.85
   5  -1  -7  566.35   20.05
  -5   1   7  567.54   22.86
  -5   1   7  573.02   19.40
  -5   1   8  634.86   24.66
   5  -1  -8  636.74   20.48
  -5   1   8  620.54   21.32
  -5   1   9  276.61   18.37
  -5   1   9  266.09   15.54
   5  -1  -9  300.65   13.67
  -5   1  10  261.67   16.46
  -5   1  10  284.00   19.56
  -5   1  11  176.03   15.06
   5  -1 -11  207.36   18.38
   5  -1 -12  149.91   17.68
  -5   1  12  134.08   14.81
  -5   1  13  106.77   15.15
   5  -1 -13  112.09   17.00
   5  -1 -14   74.45   15.43
  -5   1  14   66.31   13.03
   5  -2   0  507.68   21.18
  -5   2   0  478.86   18.35
  -5   2   1  323.01   15.23
   5  -2  -1  339.29   17.70
  -5   2   2  993.25   25.92
   5  -2  -2 1069.07   13.82
   5  -2  -2 1058.83   29.05
  -5   2   3  508.02   19.44
   5  -2  -3  540.27   21.08
  -5   2   3  514.22   11.63
  -5   2   4  593.22   21.63
  -5   2   4  604.04   15.07
   5  -2  -4  604.72   21.84
   5  -2  -5  291.04   15.74
  -5   2   5  297.40   16.79
  -5   2   5  296.89   11.89
  -5   2   6  255.65   16.27
  -5   2   6  275.01   12.64
   5  -2  -6  284.73   15.21
  -5   2   7  237.25   16.20
   5  -2  -7  250.83   13.99
  -5   2   7  220.48   12.44
  -5   2   8  132.30   13.92
  -5   2   8  133.98   11.13
   5  -2  -8  136.66   10.82
  -5   2   9  221.73   17.04
  -5   2   9  188.14   13.80
   5  -2  -9  236.57   19.68
  -5   2  10  281.26   19.40
  -5   2  10  254.75   16.46
  -5   2  11  141.21   14.13
   5  -2 -11  160.12   17.03
   5  -2 -12  216.04   19.60
  -5   2  12  173.30   16.37
   5  -2 -13  264.39   22.21
  -5   2  13  252.53   19.73
   5  -3   0  310.52   17.46
  -5   3   0  294.53   15.35
   5  -3  -1  446.45   20.10
  -5   3   1  401.82   16.80
   5  -3  -2  600.66   22.68
  -5   3   2  584.37   20.38
  -5   3   3  418.69   18.02
  -5   3   3  442.51    9.99
   5  -3  -3  425.39   19.18
  -5   3   4  487.15   20.01
  -5   3   4  492.78   13.08
   5  -3  -4  471.48   19.77
   5  -3  -5  228.64   14.54
  -5   3   5  213.77   10.19
   5  -3  -6  166.49   12.49
  -5   3   6  172.50   14.43
  -5   3   6  165.14   10.21
   5  -3  -7  117.49   10.78
  -5   3   7  125.58   10.03
  -5   3   7  146.01   14.14
  -5   3   8  116.30   13.59
   5  -3  -8  101.33    9.86
  -5   3   8   95.70   10.17
  -5   3   9  471.63   23.29
  -5   3   9  414.15   18.96
  -5   3  10  328.27   18.41
  -5   3  10  380.83   22.17
  -5   3  11  197.96   16.27
   5  -3 -12  143.05   17.58
  -5   3  12  121.65   14.78
   5  -3 -13  265.35   22.32
  -5   3  13  238.36   19.85
  -5   4   0  126.58   11.75
   5  -4   0  136.78   13.49
   5  -4  -1  518.31   21.90
  -5   4   1  465.96   18.69
   5  -4  -2   97.18   11.68
  -5   4   2   91.26   10.34
  -5   4   3  464.19   19.16
   5  -4  -3  479.18   20.57
   5  -4  -4  293.74   16.42
  -5   4   4  310.38   10.31
  -5   4   4  291.12   16.24
   5  -4  -5  306.47   16.24
  -5   4   5  311.36   11.98
  -5   4   5  321.28   17.64
   5  -4  -6  489.63   19.57
  -5   4   6  443.05   15.57
  -5   4   6  513.83   22.33
  -5   4   7  203.57   16.05
  -5   4   7  165.35   11.30
   5  -4  -7  198.43   13.15
  -5   4   8  193.82   13.09
   5  -4  -8  220.50   13.23
  -5   4   8  249.27   17.70
  -5   4   9  267.21   15.95
  -5   4   9  287.56   19.37
  -5   4  10  442.47   23.77
  -5   4  10  376.12   20.00
  -5   4  11  163.73   15.57
  -5   4  11  162.75   17.55
   5  -4 -12  196.75   19.33
  -5   4  12  185.27   17.17
  -5   4  13  131.98   15.86
   5  -4 -13  150.29   20.19
   5  -5   0  445.02   21.09
  -5   5   0  471.88   19.90
  -5   5   1  166.15   12.91
   5  -5  -1  195.81   15.26
   5  -5  -2  316.08   18.05
  -5   5   2  311.26   16.36
  -5   5   3  310.18   16.45
   5  -5  -3  333.57   18.09
   5  -5  -4  234.29   15.49
  -5   5   4  226.75   15.21
  -5   5   5  263.48   11.22
  -5   5   5  321.53   18.01
   5  -5  -5  294.15   16.56
   5  -5  -6  547.04   21.26
  -5   5   6  488.40   16.75
  -5   5   6  558.12   23.44
  -5   5   7  562.24   24.29
   5  -5  -7  550.63   20.93
  -5   5   7  480.74   18.34
  -5   5   8  355.01   20.61
  -5   5   8  327.61   16.65
   5  -5  -8  357.99   16.59
  -5   5   9  327.57   20.92
  -5   5   9  295.19   17.09
  -5   5  10  300.42   18.67
  -5   5  10  318.95   21.65
  -5   5  11  145.07   15.13
  -5   5  11  168.26   17.64
   5  -5 -12  147.89   17.88
  -5   5  12  136.06   16.42
  -5   6   0  512.99   21.42
   5  -6   0  523.45   23.36
   5  -6  -1  227.24   15.98
  -5   6   1  206.79   14.37
   5  -6  -2  382.03   20.18
  -5   6   2  369.29   17.96
  -5   6   3  417.81   19.16
   5  -6  -3  468.82   21.67
  -5   6   4  323.19   17.85
   5  -6  -4  330.99   18.28
  -5   6   5  208.21   16.77
   5  -6  -5  310.14   17.98
  -5   6   5  307.92   18.39
  -5   6   6  275.16   17.92
   5  -6  -6  272.64   16.65
  -5   6   6  195.39   11.35
  -5   6   7  435.17   22.11
  -5   6   7  320.94   15.54
   5  -6  -7  396.64   18.87
   5  -6  -8  206.75   14.28
  -5   6   8  169.01   13.02
  -5   6   8  194.27   17.28
  -5   6   9  368.90   21.96
  -5   6   9  362.18   19.36
  -5   6  10  273.31   20.19
  -5   6  10  274.35   18.29
  -5   6  11  205.18   17.25
   5  -6 -12   66.42   13.81
  -5   6  12   98.04   15.10
  -5   7   0  204.13   15.46
   5  -7  -1  424.66   21.90
  -5   7   1  400.28   19.33
  -5   7   2  372.87   19.07
   5  -7  -2  359.27   20.44
   5  -7  -3  341.53   19.79
  -5   7   3  308.67   17.51
   5  -7  -4  240.43   16.97
  -5   7   4  236.19   16.70
  -5   7   5  157.22   14.58
   5  -7  -5  152.75   14.79
   5  -7  -6  430.70   21.03
  -5   7   6  465.92   22.60
  -5   7   7  192.70   12.68
  -5   7   7  254.82   18.20
   5  -7  -7  280.82   17.29
   5  -7  -8  156.06   13.50
  -5   7   8  162.35   16.46
  -5   7   8  134.51   11.98
  -5   7   9  141.12   13.34
  -5   7   9  154.00   16.33
  -5   7  10  220.74   17.13
  -5   7  10  226.26   19.21
  -5   7  11  102.26   15.14
  -5   8   0  333.29   15.82
   5  -8   0  319.73   19.99
  -5   8   0  342.55   19.20
   5  -8  -1  292.47   19.75
  -5   8   1  296.96   17.76
  -5   8   2  235.10   16.24
   5  -8  -2  245.39   18.56
  -5   8   3  208.22   15.64
   5  -8  -3  231.88   18.08
  -5   8   4  112.56   13.72
   5  -8  -4  112.73   14.05
  -5   8   5  129.95   14.05
   5  -8  -5  134.13   14.96
  -5   8   6  349.16   20.43
   5  -8  -6  330.91   20.06
  -5   8   7  251.32   18.26
   5  -8  -7  276.98   18.12
   5  -8  -8  126.88   13.37
  -5   8   8  118.80   15.27
  -5   8   8   85.65   13.04
  -5   8   9  112.83   12.25
  -5   8   9  162.60   16.64
  -5   8  10  137.12   16.39
  -5   8  10   93.21   13.60
   5  -9   0  385.68   22.72
  -5   9   0  425.32   21.41
  -5   9   1  398.33   21.00
   5  -9  -1  388.57   22.65
  -5   9   1  430.97   20.08
   5  -9  -2  191.56   18.00
  -5   9   2  176.52   15.61
  -5   9   3  267.23   18.05
   5  -9  -3  255.55   19.51
   5  -9  -4  185.46   17.98
  -5   9   4  213.06   16.83
   5  -9  -5  221.99   18.70
  -5   9   5  233.90   17.51
   5  -9  -6  171.30   16.15
  -5   9   6  161.74   15.73
   5  -9  -7   76.06   12.67
  -5   9   7   62.67   11.82
  -5   9   8   83.48   13.84
  -5   9   9  224.48   19.31
  -5  10   0  296.43   18.84
   5 -10   0  273.91   21.76
  -5  10   1  235.01   17.56
   5 -10  -1  246.40   20.71
  -5  10   2  180.37   16.06
  -5  10   2  186.46   16.15
   5 -10  -2  188.17   18.89
  -5  10   3  196.22   16.92
   5 -10  -3  187.42   18.82
  -5  10   4  237.39   18.06
   5 -10  -4  232.00   19.82
   5 -10  -5  234.00   20.10
  -5  10   5  225.71   18.27
  -5  10   6  146.75   15.93
   5 -10  -6  135.70   16.12
  -5  10   7  118.72   15.71
   5 -10  -7  100.53   14.80
  -5  11   0  213.56   17.10
   5 -11   0  233.83   21.70
  -5  11   1  210.70   17.26
   5 -11  -1  215.76   21.05
  -5  11   2  196.07   16.44
   5 -11  -2  196.43   20.36
  -5  11   2  225.21   18.77
   5 -11  -3  170.74   20.00
  -5  11   3  191.30   18.58
  -5  11   3  155.86   15.33
  -5  11   4  103.64   14.42
   5 -11  -4  127.20   18.03
  -5  11   5   90.85   13.76
   5 -11  -5  101.98   16.53
   5 -12   0  110.57   19.16
  -5  12   0  104.32   14.24
   5 -12  -1  116.15   18.76
  -5  12   1  114.54   15.10
   5 -12  -2  112.24   18.07
  -5  12   2  125.40   15.24
  -5  12   2  202.61   28.11
  -4 -10   1  110.09   17.38
   4  10  -1  111.97   15.57
   4  10  -2   97.91   14.77
  -4 -10   2  100.50   16.87
  -4 -10   3   73.26   15.38
   4  10  -3   99.02   14.92
  -4 -10   4  216.95   21.44
   4  10  -4  206.89   19.32
  -4 -10   5  228.79   21.81
   4  10  -5  241.16   21.53
  -4 -10   6  227.44   21.26
   4  10  -6  251.05   22.13
  -4 -10   7  144.85   19.65
   4  10  -7  149.95   18.90
   4  10  -8   84.44   15.91
  -4 -10   8   62.74   13.67
   4   9  -1  168.74   16.56
  -4  -9   1  158.22   17.21
   4   9  -2  167.22   16.69
  -4  -9   2  150.54   16.82
   4   9  -3  152.37   16.31
  -4  -9   3  152.96   19.82
   4   9  -4   94.14   13.66
  -4  -9   4  112.19   16.97
   4   9  -5  191.81   17.96
  -4  -9   5  178.02   18.62
  -4  -9   6  162.86   17.79
   4   9  -6  201.25   19.49
  -4  -9   7  172.89   18.16
   4   9  -7  175.71   18.91
  -4  -9   8  197.95   17.90
   4   9  -8  243.35   22.50
  -4  -9   9  124.11   15.46
  -4  -9   9  146.10   17.42
  -4  -9  10   90.57   13.96
  -4  -9  10  134.22   18.35
  -4  -8   1  191.80   18.07
   4   8  -1  191.72   16.01
   4   8  -2  229.48   17.19
  -4  -8   2  213.37   18.81
  -4  -8   3  266.55   20.42
   4   8  -3  320.19   19.18
  -4  -8   4  222.69   19.05
   4   8  -4  242.85   17.64
   4   8  -5  324.05   20.06
  -4  -8   5  272.84   20.15
  -4  -8   6  167.88   16.54
   4   8  -6  234.75   18.38
   4   8  -7  176.29   17.56
  -4  -8   7  136.24   15.00
  -4  -8   8  270.45   19.03
  -4  -8   8  301.87   20.89
  -4  -8   9   87.93   12.90
  -4  -8   9   97.62   14.48
  -4  -8  10  112.12   16.36
  -4  -8  10   96.20   13.15
  -4  -8  11  224.21   20.97
   4   8 -11  246.29   25.07
   4   7  -1  391.22   19.76
  -4  -7   1  355.47   21.70
   4   7  -2  535.26   22.58
  -4  -7   2  501.15   24.87
   4   7  -3  255.11   16.53
  -4  -7   3  251.66   18.62
   4   7  -4  413.24   20.13
  -4  -7   4  365.60   21.45
   4   7  -5  421.31   20.84
  -4  -7   5  365.25   20.96
  -4  -7   6  223.01   16.90
   4   7  -6  276.94   18.92
   4   7  -6  244.15   16.92
  -4  -7   7  171.96   15.26
   4   7  -7  157.23   12.35
  -4  -7   7  154.76   14.82
  -4  -7   8  173.00   16.28
   4   7  -8  149.40   12.73
  -4  -7   8  132.17   13.53
  -4  -7   9  145.18   16.06
  -4  -7   9  127.53   12.78
   4   7  -9  132.34   12.96
   4   7 -10  199.93   16.27
  -4  -7  10  203.77   14.88
  -4  -7  10  230.90   19.52
  -4  -7  11  243.12   20.55
   4   7 -11  205.06   17.16
  -4  -7  12  176.25   19.57
   4   7 -12  171.20   16.87
  -4  -6   1  469.28   22.89
   4   6  -1  502.40   20.44
  -4  -6   2  698.24   27.29
   4   6  -2  720.65   23.81
   4   6  -3  452.27   19.37
   4   6  -3  513.46   15.07
  -4  -6   3  451.29   22.34
   4   6  -4  216.93   11.50
  -4  -6   4  214.52   16.25
   4   6  -4  212.41   14.57
  -4  -6   5  166.48   14.93
   4   6  -5  177.96   11.39
   4   6  -5  187.55   14.70
  -4  -6   6  159.57   13.68
   4   6  -6  175.04   12.23
  -4  -6   6  131.93   13.06
  -4  -6   7  216.70   16.00
  -4  -6   7  147.30   12.97
   4   6  -7  200.73   13.58
  -4  -6   8  347.45   20.26
  -4  -6   8  293.88   16.69
   4   6  -8  303.38   16.93
  -4  -6   9  296.65   19.73
  -4  -6   9  235.94   15.22
   4   6  -9  262.12   17.02
   4   6 -10  205.21   16.30
  -4  -6  10  239.30   19.20
  -4  -6  10  219.42   14.33
  -4  -6  11  159.76   16.97
   4   6 -11  144.68   15.53
  -4  -6  12  188.12   19.10
   4   6 -12  185.17   17.00
  -4  -6  13  160.26   18.95
   4   6 -13  172.99   18.03
  -4  -5   1  411.24   12.17
   4   5  -1  416.32   17.36
  -4  -5   1  386.88   20.08
  -4  -5   2  480.04   21.86
  -4  -5   2  512.85   14.35
   4   5  -2  555.90   19.53
   4   5  -3  575.74   20.09
  -4  -5   3  554.60   15.85
  -4  -5   3  499.79   21.98
  -4  -5   4  194.27   14.53
   4   5  -4  204.67   13.52
  -4  -5   5  398.86   18.02
   4   5  -5  405.93   16.10
  -4  -5   5  374.84   18.73
  -4  -5   6  188.88   13.86
  -4  -5   6  148.86   12.69
   4   5  -6  190.26   12.38
  -4  -5   7  190.24   13.43
  -4  -5   7  196.53   14.73
   4   5  -7  203.39   13.86
  -4  -5   8  230.90   14.47
   4   5  -8  282.10   16.61
  -4  -5   8  281.58   18.11
   4   5  -9  474.72   21.95
  -4  -5   9  468.38   19.42
  -4  -5   9  507.12   23.81
  -4  -5  10  221.25   17.61
   4   5 -10  206.82   16.54
  -4  -5  10  182.79   12.64
   4   5 -11  212.80   17.18
  -4  -5  11  184.52   17.07
   4   5 -12  126.23   15.20
  -4  -5  12  140.18   16.02
  -4  -5  13  105.13   15.65
   4   5 -13  112.17   16.33
  -4  -5  14  177.93   19.38
   4   5 -14  152.05   17.79
  -4  -4   1  200.06    9.04
  -4  -4   1  201.45   14.67
   4   4  -1  223.26   11.98
  -4  -4   2  555.51   22.22
  -4  -4   2  526.02   14.78
   4   4  -2  584.14   18.59
  -4  -4   3  111.16    7.94
   4   4  -3  111.57    9.55
  -4  -4   3  112.14   11.66
  -4  -4   4  370.14   13.82
  -4  -4   4  359.01   17.79
  -4  -4   4  380.57   15.76
  -4  -4   5  737.05   23.10
  -4  -4   5  688.84   23.61
  -4  -4   5  745.23   20.73
  -4  -4   6  608.35   21.89
  -4  -4   6  595.95   21.70
   4   4  -6  644.77   20.84
  -4  -4   7  233.97   14.29
  -4  -4   7  233.99   15.39
   4   4  -7  227.91   14.21
  -4  -4   8  312.32   17.92
   4   4  -8  334.08   17.75
  -4  -4   8  312.06   15.82
   4   4  -9  309.68   18.00
  -4  -4   9  317.77   18.71
  -4  -4   9  303.15   15.34
  -4  -4  10  267.89   18.13
   4   4 -10  276.03   18.58
  -4  -4  10  236.22   13.23
   4   4 -11  227.70   18.40
  -4  -4  11  192.05   16.61
   4   4 -12  196.06   17.74
  -4  -4  12  169.39   16.29
  -4  -4  13  147.62   16.29
   4   4 -13  160.40   18.02
  -4  -4  14   91.90   14.63
   4   4 -14  110.59   16.29
  -4  -3   1  391.51   18.31
   4   3  -1  426.64   14.53
  -4  -3   1  391.02   12.70
  -4  -3   2  508.72   14.90
  -4  -3   2  548.69   21.01
   4   3  -2  557.23   16.70
  -4  -3   3  282.13   11.69
   4   3  -3  303.65   13.04
  -4  -3   3  291.17   15.78
  -4  -3   4  760.70   19.85
  -4  -3   4  772.54   24.24
  -4  -3   4  806.12   21.81
  -4  -3   5  899.22   24.26
  -4  -3   5  869.20   22.38
  -4  -3   5  867.33   25.44
  -4  -3   6  446.62   18.28
  -4  -3   6  455.38   18.45
  -4  -3   6  423.62   16.73
   4   3  -7   97.96   10.76
  -4  -3   7   98.69   10.02
  -4  -3   7   88.84   10.69
   4   3  -8  448.77   19.91
  -4  -3   8  458.65   20.17
  -4  -3   8  496.49   18.74
  -4  -3   9  486.30   21.63
   4   3  -9  502.65   21.96
  -4  -3   9  513.64   18.55
  -4  -3  10  574.60   24.13
  -4  -3  10  474.68   18.63
   4   3 -10  595.91   25.07
   4   3 -11  327.18   20.66
  -4  -3  11  312.96   19.65
  -4  -3  12  124.54   14.43
   4   3 -12  114.72   15.40
  -4  -3  13  273.63   19.85
   4   3 -13  301.74   21.81
   4   3 -14   51.61   13.07
  -4  -3  14   52.02   11.60
  -4  -2   1  541.76   15.46
   4   2  -1  586.00   15.40
  -4  -2   1  519.69   19.47
  -4  -2   2  376.62   16.89
  -4  -2   2  365.15   13.14
   4   2  -2  412.06   13.16
  -4  -2   3  824.34   24.15
  -4  -2   3  858.29   20.57
  -4  -2   3  848.47   20.02
  -4  -2   4  663.70   18.68
  -4  -2   4  670.69   21.64
  -4  -2   4  707.59   19.30
  -4  -2   5  762.85   21.34
  -4  -2   5  680.88   19.75
  -4  -2   5  722.84   22.44
  -4  -2   6  267.52   14.02
  -4  -2   6  254.97   13.47
  -4  -2   6  264.78   13.76
  -4  -2   7  802.65   23.06
  -4  -2   7  766.19   23.28
  -4  -2   7  796.55   24.16
   4   2  -8  605.93   22.36
  -4  -2   8  645.81   22.67
  -4  -2   8  626.51   19.78
   4   2  -9  575.46   23.14
  -4  -2   9  551.42   22.24
  -4  -2  10  286.36   17.52
   4   2 -10  322.49   19.14
  -4  -2  11  167.20   14.81
   4   2 -11  190.64   16.87
   4   2 -12  333.84   22.06
  -4  -2  12  281.71   18.99
  -4  -2  13  140.69   16.06
   4   2 -13  122.14   16.73
   4   2 -14  153.60   20.15
  -4  -2  14  139.25   16.29
  -4  -2  15   74.99   14.20
   4   2 -15  113.44   17.42
  -4  -1   1  446.58   14.48
   4   1  -1  472.94   12.31
  -4  -1   1  395.91   16.43
  -4  -1   2 1150.46   23.85
   4   1  -2 1221.46   21.71
  -4  -1   2 1076.03   26.61
  -4  -1   3 1468.94   27.99
  -4  -1   3 1437.61   25.64
  -4  -1   3 1367.51   30.14
  -4  -1   4 1048.55   24.28
  -4  -1   4 1123.21   23.71
  -4  -1   4 1076.19   26.42
  -4  -1   5  245.78   12.78
  -4  -1   5  267.25   12.23
  -4  -1   5  260.68   12.89
  -4  -1   6  120.96    9.61
  -4  -1   6  112.34    9.87
  -4  -1   6  106.01    9.21
   4   1  -7  447.63   16.37
  -4  -1   7  415.47   16.88
  -4  -1   7  388.25   16.95
   4   1  -8  741.40   19.90
  -4  -1   8  665.01   22.43
  -4  -1   8  646.35   22.72
   4   1  -9  705.85   25.34
  -4  -1   9  653.38   23.42
   4   1  -9  709.11   18.34
  -4  -1  10  386.09   19.38
   4   1 -10  425.93   21.52
   4   1 -11  152.21   15.81
  -4  -1  11  132.62   14.01
  -4  -1  12  184.15   15.95
   4   1 -12  213.06   18.65
   4   1 -13   88.34   14.69
  -4  -1  13   98.70   14.45
  -4  -1  14  207.32   18.70
   4   1 -14  242.28   21.44
  -4  -1  15   67.88   14.14
   4   1 -15   60.95   14.71
   4   0  -1  584.66   11.93
   4   0  -1  564.73   19.07
  -4   0   1  538.05   16.35
  -4   0   2  803.05   20.31
   4   0  -2  813.40   22.48
  -4   0   2  786.07   15.28
   4   0  -3  964.30   24.27
  -4   0   3  963.26   19.03
  -4   0   3  947.17   22.73
   4   0  -4 1342.73   28.68
  -4   0   4 1314.33   27.64
  -4   0   4 1306.65   24.83
   4   0  -5  774.69   21.19
  -4   0   5  732.79   21.24
  -4   0   5  775.65   19.68
  -4   0   6  647.07   19.17
  -4   0   6  631.99   20.52
   4   0  -6  638.89   18.68
  -4   0   7   77.17    9.96
   4   0  -7   76.67    7.71
  -4   0   7   67.73    8.45
  -4   0   8   50.10    8.62
   4   0  -8   58.80    6.73
  -4   0   8   59.11    8.75
   4   0  -9  116.38    7.88
  -4   0   9  102.37   10.77
  -4   0  10  334.64   18.50
   4   0 -10  421.02   21.33
   4   0 -11  745.40   29.03
  -4   0  11  702.31   26.85
   4   0 -12  141.62   16.72
  -4   0  12  113.56   13.87
  -4   0  13  343.13   21.84
   4   0 -13  361.30   23.83
   4   0 -14  129.37   18.68
  -4   0  14  146.02   17.55
  -4   0  15  186.11   19.28
   4   0 -15  177.39   20.30
   4  -1   0  561.56   18.74
   4  -1   0  556.92    9.27
  -4   1   0  526.40   16.24
   4  -1  -1  505.96    9.12
  -4   1   1  458.77   15.39
   4  -1  -1  500.53   17.73
  -4   1   2  696.52   19.32
  -4   1   2  668.26   12.49
   4  -1  -2  657.71   19.81
   4  -1  -3  562.07   18.02
  -4   1   3  584.58   18.27
  -4   1   3  604.46   13.75
  -4   1   4  488.52   17.37
  -4   1   4  502.73   13.90
   4  -1  -4  477.56   16.41
  -4   1   5  477.93   14.93
  -4   1   5  479.10   17.56
   4  -1  -5  508.12   16.71
  -4   1   6  358.70   14.11
  -4   1   6  370.05   16.48
   4  -1  -6  357.08   13.78
  -4   1   7  534.13   20.10
   4  -1  -7  564.72   16.42
  -4   1   7  485.48   17.53
  -4   1   8  212.83   13.38
  -4   1   8  198.71   13.99
   4  -1  -8  209.78   10.07
  -4   1   9  163.86   13.90
   4  -1  -9  162.97    8.57
  -4   1   9  153.31   12.79
   4  -1 -10  491.51   22.97
  -4   1  10  446.56   20.84
  -4   1  11  330.30   19.70
   4  -1 -11  339.87   21.22
  -4   1  12  247.82   18.60
   4  -1 -12  280.69   20.54
   4  -1 -13  264.65   21.82
  -4   1  13  260.06   20.00
  -4   1  14  172.57   18.00
   4  -1 -14  171.11   19.88
  -4   1  15  127.43   18.29
   4  -1 -15  168.69   21.91
   4  -2   0  560.82   19.06
  -4   2   0  545.15   16.92
   4  -2  -1  397.84   16.06
  -4   2   1  387.97   14.59
  -4   2   2  333.55   14.01
   4  -2  -2  366.89   15.15
  -4   2   2  337.25    7.68
  -4   2   3  422.99   10.82
   4  -2  -3  423.98   15.87
  -4   2   3  432.84   16.20
  -4   2   4  603.72   14.91
   4  -2  -4  599.25   18.54
  -4   2   4  621.47   19.82
   4  -2  -5  461.08   16.05
  -4   2   5  465.87   14.48
  -4   2   5  480.63   18.27
   4  -2  -6  408.53   14.75
  -4   2   6  430.96   18.00
  -4   2   6  394.01   14.74
   4  -2  -7  710.42   18.38
  -4   2   7  650.49   20.19
  -4   2   7  692.24   23.12
  -4   2   8  395.69   17.35
  -4   2   8  427.28   19.33
   4  -2  -8  420.74   13.80
  -4   2   9  350.50   17.75
   4  -2  -9  359.36   15.51
  -4   2   9  347.23   18.72
   4  -2 -10  654.53   26.08
  -4   2  10  625.02   24.56
   4  -2 -11  302.97   20.16
  -4   2  11  288.05   18.57
  -4   2  12  371.38   21.84
   4  -2 -12  384.53   23.37
   4  -2 -13  215.57   20.41
  -4   2  13  227.11   19.39
  -4   2  14  123.92   17.60
   4  -2 -14  118.99   17.39
   4  -3   0  221.18   13.16
  -4   3   0  205.06   11.35
   4  -3  -1  872.03   23.65
  -4   3   1  776.10   20.37
  -4   3   2  410.84    8.35
  -4   3   2  407.99   15.60
   4  -3  -2  414.85   16.38
  -4   3   3  617.48   19.43
  -4   3   3  669.87   13.72
   4  -3  -3  653.07   20.01
  -4   3   4  759.57   22.27
  -4   3   4  715.87   16.05
   4  -3  -4  729.05   20.70
  -4   3   5  354.95   12.84
  -4   3   5  392.28   16.77
   4  -3  -5  404.61   15.51
  -4   3   6  648.44   18.77
   4  -3  -6  698.56   19.40
  -4   3   6  751.17   23.64
  -4   3   7  709.15   21.51
   4  -3  -7  785.99   20.00
  -4   3   7  771.27   24.75
   4  -3  -8  585.22   16.75
  -4   3   8  570.92   21.03
  -4   3   8  591.90   22.74
  -4   3   9  516.14   22.36
  -4   3   9  511.94   21.57
  -4   3  10  371.17   19.97
   4  -3 -11  372.64   21.82
  -4   3  11  363.74   21.15
   4  -3 -12  170.81   17.74
  -4   3  12  173.35   16.98
   4  -3 -13  176.20   18.60
  -4   3  13  176.61   17.91
   4  -3 -14  174.73   20.24
  -4   3  14  171.37   18.98
  -4   4   0  657.22   19.65
   4  -4   0  712.88   22.48
  -4   4   1  323.84   14.12
   4  -4  -1  344.41   15.98
   4  -4  -2  510.37   18.67
  -4   4   2  476.23   16.79
  -4   4   2  540.96   10.19
  -4   4   3  805.64   15.13
   4  -4  -3  816.91   23.22
  -4   4   3  824.07   22.74
   4  -4  -4  866.30   23.32
  -4   4   4  781.26   17.18
  -4   4   4  864.91   24.13
  -4   4   5  429.48   14.50
  -4   4   5  466.92   18.82
   4  -4  -5  478.35   17.46
   4  -4  -6  365.08   15.14
  -4   4   6  369.38   17.66
  -4   4   6  320.62   14.08
  -4   4   7  466.60   18.13
  -4   4   7  487.47   20.43
   4  -4  -7  511.51   17.28
   4  -4  -8  423.97   15.27
  -4   4   8  428.83   19.95
  -4   4   8  387.25   17.97
  -4   4   9  378.00   19.86
  -4   4   9  366.41   18.88
  -4   4  10  599.33   25.54
  -4   4  10  564.45   24.53
  -4   4  11  364.61   21.47
   4  -4 -11  377.52   22.00
   4  -4 -12  159.65   17.00
  -4   4  12  151.08   15.97
   4  -4 -13   92.04   15.42
  -4   4  13  100.94   15.65
  -4   4  14  169.17   19.13
   4  -4 -14  150.48   20.12
   4  -5   0  697.85   23.16
  -4   5   0  629.29   19.92
  -4   5   0  693.53   16.73
  -4   5   1  544.64   18.50
   4  -5  -1  550.71   20.51
  -4   5   2  657.55   12.45
   4  -5  -2  763.19   23.65
  -4   5   2  711.48   21.21
  -4   5   3  689.06   21.39
   4  -5  -3  709.67   22.75
  -4   5   3  634.30   14.59
  -4   5   4  428.84   13.63
  -4   5   4  466.56   18.60
   4  -5  -4  457.04   18.17
   4  -5  -5  231.25   13.73
  -4   5   5  218.42   14.14
  -4   5   5  198.36   10.81
   4  -5  -6  277.66   14.40
  -4   5   6  286.44   16.20
  -4   5   6  269.79   13.40
   4  -5  -7  699.39   21.27
  -4   5   7  645.57   21.80
  -4   5   7  733.61   25.00
  -4   5   8  279.12   16.89
   4  -5  -8  309.70   14.25
  -4   5   8  273.30   15.84
  -4   5   9  147.02   13.69
  -4   5   9  156.61   14.84
  -4   5  10  241.68   17.32
  -4   5  10  269.41   18.42
   4  -5 -11  333.39   21.44
  -4   5  11  311.21   20.43
   4  -5 -12  140.21   16.39
  -4   5  12  136.60   16.27
   4  -5 -13  230.87   20.46
  -4   5  13  228.15   19.95
   4  -6   0  240.25   15.37
  -4   6   0  219.40   13.22
  -4   6   1  716.42   21.70
  -4   6   1  749.24   14.00
   4  -6  -1  793.86   25.50
  -4   6   1  781.35   20.60
  -4   6   2  370.16   16.58
   4  -6  -2  368.67   17.85
  -4   6   2  370.60   11.07
   4  -6  -3  388.93   18.18
  -4   6   3  374.80   16.71
  -4   6   3  365.47   12.35
  -4   6   4  391.05   14.13
   4  -6  -4  421.34   18.64
  -4   6   4  425.08   18.34
   4  -6  -5  210.02   14.21
  -4   6   5  191.93   11.32
  -4   6   5  199.64   13.97
  -4   6   6  453.92   17.83
   4  -6  -6  494.42   19.69
  -4   6   6  491.56   20.96
  -4   6   7  472.70   20.73
   4  -6  -7  507.24   19.52
  -4   6   7  442.64   18.77
  -4   6   8  248.35   16.40
  -4   6   8  251.15   15.67
   4  -6  -8  270.58   14.36
  -4   6   9  136.26   13.41
  -4   6   9  132.91   13.86
  -4   6  10  230.25   17.62
  -4   6  11  135.13   15.61
   4  -6 -11  147.96   15.92
  -4   6  12  126.06   16.88
   4  -6 -12  107.16   15.49
   4  -6 -13  175.91   19.25
  -4   6  13  139.43   18.41
  -4   7   0  431.73   18.07
   4  -7   0  423.25   20.50
  -4   7   0  479.58   11.89
  -4   7   1 1049.16   19.82
   4  -7  -1  988.89   29.84
  -4   7   1  924.96   25.38
  -4   7   2  643.50   16.56
   4  -7  -2  660.95   24.64
  -4   7   2  610.53   21.13
  -4   7   2  624.62   20.90
  -4   7   3  380.27   13.97
   4  -7  -3  405.37   19.70
  -4   7   3  377.17   17.70
  -4   7   3  396.98   17.67
  -4   7   4  289.77   15.94
   4  -7  -4  305.62   17.61
  -4   7   4  311.24   13.75
  -4   7   5  318.14   15.00
  -4   7   5  329.26   17.58
   4  -7  -5  335.27   18.05
   4  -7  -6  413.47   19.17
  -4   7   6  385.99   18.87
  -4   7   6  390.41   17.41
  -4   7   7  211.41   15.20
  -4   7   7  204.03   14.05
   4  -7  -7  216.56   14.53
  -4   7   8  124.12   13.21
  -4   7   8  130.41   13.79
   4  -7  -8  144.40   12.27
  -4   7   9  198.73   16.53
  -4   7   9  197.22   15.96
  -4   7  10  385.71   21.98
   4  -7 -10  422.96   22.56
   4  -7 -11  142.52   16.55
  -4   7  11  162.62   16.77
   4  -7 -12  151.23   17.52
  -4   7  12  160.04   17.99
  -4   8   0  171.28    8.86
  -4   8   0  169.45   13.37
   4  -8   0  151.62   14.73
   4  -8  -1  318.44   19.28
  -4   8   1  356.67   13.00
  -4   8   1  300.41   15.81
  -4   8   2  441.92   19.05
  -4   8   2  514.76   16.60
   4  -8  -2  446.42   22.00
  -4   8   3  711.89   20.63
  -4   8   3  684.18   23.53
  -4   8   3  712.80   24.87
   4  -8  -3  683.30   26.49
  -4   8   4  471.74   17.95
  -4   8   4  469.14   20.30
   4  -8  -4  479.93   22.46
   4  -8  -5  410.82   20.64
  -4   8   5  407.40   19.51
  -4   8   5  416.45   17.91
   4  -8  -6  138.24   13.34
  -4   8   6  132.96   13.30
  -4   8   6  118.94   11.67
  -4   8   7  209.67   15.72
  -4   8   7  218.46   15.54
   4  -8  -7  224.18   15.76
  -4   8   8  194.76   15.80
   4  -8  -8  204.80   14.51
  -4   8   8  197.02   15.51
  -4   8   9  414.70   21.73
  -4   8   9  407.76   22.44
  -4   8  10  166.27   16.68
   4  -8 -10  169.20   16.60
  -4   8  11  188.27   17.89
   4  -8 -11  166.40   16.79
  -4   9   0  325.35   17.07
  -4   9   0  312.45   20.57
   4  -9   0  335.38   21.00
  -4   9   1  281.33   16.37
  -4   9   1  277.06   12.87
   4  -9  -1  296.97   19.94
  -4   9   2  243.56   13.02
   4  -9  -2  222.33   17.21
  -4   9   2  226.48   14.99
  -4   9   3  178.23   12.31
  -4   9   3  155.04   13.44
   4  -9  -3  169.99   16.14
  -4   9   4  379.38   20.59
  -4   9   4  372.90   17.57
  -4   9   4  366.44   18.64
   4  -9  -4  348.43   20.86
   4  -9  -5  198.00   17.07
  -4   9   5  167.46   14.16
  -4   9   5  153.20   13.13
  -4   9   6  123.50   12.64
   4  -9  -6  136.10   14.49
  -4   9   6  157.92   13.85
  -4   9   7  185.62   15.26
   4  -9  -7  209.18   16.44
  -4   9   7  213.46   16.21
  -4   9   8  584.19   26.36
   4  -9  -8  555.50   23.73
  -4   9   8  512.57   23.51
  -4   9   9  467.84   24.96
  -4   9   9  451.67   23.25
  -4   9  10  157.53   17.42
   4  -9 -10  161.48   16.31
   4 -10   0  239.48   19.79
  -4  10   0  261.23   16.21
   4 -10  -1  341.08   22.18
  -4  10   1  336.28   17.77
   4 -10  -2  235.97   19.28
  -4  10   2  213.99   15.11
  -4  10   2  194.96   12.80
   4 -10  -3  179.49   17.61
  -4  10   3  168.45   12.91
  -4  10   3  184.68   14.34
  -4  10   4  279.57   19.76
  -4  10   4  254.66   16.07
   4 -10  -4  258.58   19.76
  -4  10   4  248.34   16.17
  -4  10   5  170.91   14.49
  -4  10   5  183.94   15.27
   4 -10  -5  189.20   17.49
  -4  10   5  196.65   17.59
  -4  10   6  128.11   13.47
   4 -10  -6  123.42   14.62
  -4  10   6  137.03   14.77
  -4  10   7  113.77   13.22
   4 -10  -7  147.50   14.97
  -4  10   7  154.82   16.08
  -4  10   8  294.55   21.11
  -4  10   8  244.75   17.86
   4 -10  -8  258.01   22.44
   4 -11   0  216.11   20.22
  -4  11   0  221.82   15.78
   4 -11  -1  297.97   22.45
  -4  11   1  290.51   17.16
   4 -11  -2  142.22   17.67
  -4  11   2  113.44   12.70
   4 -11  -3  188.42   19.07
  -4  11   3  179.47   14.44
  -4  11   3  153.40   14.26
  -4  11   4  131.57   13.47
  -4  11   4  180.46   18.45
   4 -11  -4  149.07   17.62
  -4  11   4  160.51   14.23
   4 -11  -5  182.45   18.12
  -4  11   5  160.09   14.35
  -4  11   5  145.69   14.54
  -4  11   5  161.73   18.66
  -4  11   6  128.06   13.67
  -4  11   6  126.31   15.20
   4 -11  -6  132.41   17.22
   4 -11  -7  145.07   16.37
  -4  11   7  162.29   21.63
  -4  11   7  156.20   17.52
  -4  12   0  130.83   13.46
   4 -12   0  162.53   20.98
  -4  12   1   95.59   12.18
   4 -12  -1  140.82   20.18
   4 -12  -2  238.22   22.27
  -4  12   2  197.04   15.41
   4 -12  -3  285.52   23.00
  -4  12   3  294.90   23.50
  -4  12   4  218.60   20.71
   4 -12  -4  195.88   20.20
  -4  12   5  159.10   26.80
   4 -12  -5  114.22   17.74
   4 -13   0   83.51   17.08
   4 -13  -1   55.48   14.30
   3  11  -1  154.99   17.48
  -3 -11   1  112.36   17.81
   3  11  -2  231.56   19.98
  -3 -11   2  196.65   20.65
   3  11  -3   96.47   15.06
  -3 -11   3   92.46   16.32
   3  11  -4  129.59   16.45
  -3 -11   4  131.73   19.44
   3  11  -5   90.20   14.55
  -3 -11   5   96.63   16.93
   3  11  -6  152.40   18.45
  -3 -11   6  148.23   18.55
  -3 -11   7  213.35   20.70
   3  11  -7  244.07   21.26
  -3 -11   8  144.74   18.07
   3  11  -8  189.86   20.95
   3  10  -1  231.39   18.67
  -3 -10   1  218.11   19.73
   3  10  -2  180.06   17.89
  -3 -10   2  169.80   17.46
   3  10  -3  278.94   19.80
  -3 -10   3  278.77   21.85
   3  10  -4  220.28   18.53
  -3 -10   4  207.29   18.83
   3  10  -5  292.71   20.37
  -3 -10   5  267.43   21.55
   3  10  -6  264.41   20.03
  -3 -10   6  212.95   19.57
   3  10  -7   90.71   15.17
  -3 -10   7  105.28   16.61
   3  10  -8  184.11   19.71
  -3 -10   8  157.44   17.03
  -3 -10   9  158.44   17.46
  -3 -10   9  181.68   18.41
  -3 -10  10  101.05   15.07
  -3 -10  10   89.56   15.55
  -3  -9   1  257.48   19.84
   3   9  -1  261.21   18.11
  -3  -9   2  352.70   22.47
   3   9  -2  396.26   21.25
  -3  -9   3  500.24   26.14
   3   9  -3  534.98   23.81
   3   9  -4  307.92   19.69
  -3  -9   4  286.48   20.75
  -3  -9   5  302.66   21.04
   3   9  -5  308.34   20.09
  -3  -9   6  339.21   21.82
   3   9  -6  351.26   21.17
  -3  -9   7   59.14   11.89
   3   9  -7   75.40   13.11
  -3  -9   8  222.24   18.57
  -3  -9   8  190.57   17.26
  -3  -9   9   78.40   12.85
  -3  -9   9   59.05   11.89
  -3  -9  10  184.20   18.46
  -3  -9  10  148.30   14.69
  -3  -9  11  163.62   18.68
  -3  -9  11  152.41   14.13
  -3  -9  12  171.97   20.15
   3   9 -12  184.92   18.66
  -3  -8   1  127.69   14.58
   3   8  -1  147.85   14.46
   3   8  -2  485.60   21.51
  -3  -8   2  463.78   23.67
   3   8  -3  431.19   20.41
  -3  -8   3  396.62   22.14
   3   8  -4  296.43   18.00
  -3  -8   4  304.28   19.65
  -3  -8   5  257.36   18.36
   3   8  -5  262.61   17.29
   3   8  -6   95.44   12.65
  -3  -8   6   92.06   13.11
  -3  -8   7  232.25   16.96
   3   8  -7  257.01   14.14
  -3  -8   7  242.99   17.35
  -3  -8   8  137.73   13.97
  -3  -8   8  131.58   14.54
   3   8  -8  145.03   12.36
   3   8  -9  341.29   18.09
  -3  -8   9  346.29   21.55
  -3  -8   9  336.26   19.17
  -3  -8  10  215.25   18.89
  -3  -8  10  166.78   14.14
   3   8 -10  157.32   14.48
   3   8 -11  130.70   15.12
  -3  -8  11  134.53   16.78
  -3  -8  11   98.75   10.87
  -3  -8  12  151.63   18.59
   3   8 -12  176.24   17.19
  -3  -8  13  112.55   17.38
   3   8 -13  144.78   18.29
  -3  -7   1  291.52   18.17
   3   7  -1  315.36   16.81
   3   7  -2  560.59   21.35
  -3  -7   2  520.92   23.33
   3   7  -3  471.82   19.78
  -3  -7   3  440.05   21.68
   3   7  -4  192.80   14.23
   3   7  -4  174.43    9.07
  -3  -7   4  167.06   14.60
   3   7  -5  246.32   11.60
   3   7  -5  252.48   16.64
  -3  -7   5  229.33   16.09
  -3  -7   6  381.32   18.96
   3   7  -6  360.19   14.90
  -3  -7   6  359.25   19.04
  -3  -7   7  274.90   17.43
  -3  -7   7  234.24   15.58
   3   7  -7  241.40   13.63
  -3  -7   8  147.04   13.01
   3   7  -8  140.53   11.88
  -3  -7   8  168.10   15.48
  -3  -7   9  303.54   19.85
  -3  -7   9  266.62   15.51
   3   7  -9  271.66   16.11
  -3  -7  10  249.20   14.92
   3   7 -10  255.52   16.80
  -3  -7  10  263.88   19.35
   3   7 -11  183.23   16.15
  -3  -7  11  134.18   11.00
  -3  -7  11  195.92   18.08
  -3  -7  12  188.91   18.41
   3   7 -12  179.86   16.96
  -3  -7  13   93.68   15.46
   3   7 -13   96.59   15.08
   3   7 -14  160.57   18.93
  -3  -7  14  143.61   19.23
   3   6  -1  135.78   11.41
  -3  -6   1  116.42   11.54
  -3  -6   2  326.29   17.77
   3   6  -2  346.62    9.59
   3   6  -2  340.09   15.86
  -3  -6   3  380.56   18.80
   3   6  -3  418.36   17.51
   3   6  -3  403.09   11.86
  -3  -6   4  245.92   15.48
   3   6  -4  273.42   14.97
   3   6  -4  258.90   11.00
  -3  -6   5  376.00   18.22
   3   6  -5  407.28   14.68
  -3  -6   5  404.29   17.84
  -3  -6   6 1187.13   31.27
  -3  -6   6 1093.30   29.45
   3   6  -6 1169.61   26.07
   3   6  -7  280.75   14.46
  -3  -6   7  283.22   17.07
  -3  -6   7  243.10   14.35
  -3  -6   8  195.09   13.05
  -3  -6   8  231.40   16.27
   3   6  -8  239.07   14.55
  -3  -6   9  191.23   12.67
   3   6  -9  209.54   14.96
  -3  -6   9  225.98   17.02
   3   6 -10  213.88   16.18
  -3  -6  10  221.47   17.44
  -3  -6  10  206.30   12.87
  -3  -6  11  350.12   21.40
   3   6 -11  313.02   19.08
   3   6 -12  207.59   17.65
  -3  -6  12  178.16   17.80
   3   6 -13  210.96   18.85
  -3  -6  13  224.54   19.36
  -3  -6  14  119.51   17.08
   3   6 -14  119.27   17.05
  -3  -5   1  232.67    7.47
   3   5  -1  224.33   12.22
  -3  -5   1  219.05   14.06
  -3  -5   2  458.07   18.78
   3   5  -2  518.90   17.65
   3   5  -3  445.51   12.75
   3   5  -3  435.02   16.57
  -3  -5   3  402.17   17.82
  -3  -5   4  379.00   15.91
  -3  -5   4  356.73   16.72
   3   5  -4  420.84   13.78
  -3  -5   5  974.99   25.98
  -3  -5   5  912.77   25.40
   3   5  -5 1030.74   23.13
   3   5  -6  545.67   18.42
  -3  -5   6  484.24   18.43
   3   5  -7  260.92   14.47
  -3  -5   7  231.14   12.96
  -3  -5   7  256.81   15.47
  -3  -5   8  352.42   18.50
   3   5  -8  350.27   17.38
  -3  -5   8  290.66   14.10
   3   5  -9  624.98   23.69
  -3  -5   9  627.73   24.79
  -3  -5   9  556.14   18.83
  -3  -5  10  627.62   19.68
   3   5 -10  609.41   24.42
  -3  -5  10  619.43   25.56
   3   5 -11  326.48   20.00
  -3  -5  11  289.93   19.11
   3   5 -12  179.19   16.48
  -3  -5  12  158.11   16.26
   3   5 -13  171.24   17.78
  -3  -5  13  152.93   16.30
  -3  -5  14  148.08   16.94
   3   5 -14  160.87   17.61
   3   5 -15  110.80   17.31
  -3  -5  15   93.69   15.17
  -3  -4   1  304.54   15.00
  -3  -4   1  281.45    8.69
   3   4  -1  321.42   12.81
   3   4  -2  443.54   15.04
  -3  -4   2  397.58   11.08
  -3  -4   2  397.85   16.75
  -3  -4   3  725.78   21.87
  -3  -4   3  778.93   16.96
  -3  -4   3  755.58   20.03
  -3  -4   4 1157.45   26.13
  -3  -4   4 1105.18   26.63
  -3  -4   5 1182.16   27.19
   3   4  -5 1323.44   26.31
  -3  -4   5 1270.09   28.50
  -3  -4   6  423.15   16.11
  -3  -4   6  477.18   18.30
   3   4  -6  485.04   17.22
  -3  -4   7  227.41   13.90
  -3  -4   7  225.68   12.04
   3   4  -7  236.57   13.81
  -3  -4   8  513.91   17.37
  -3  -4   8  490.43   20.36
   3   4  -8  501.57   20.02
  -3  -4   9  562.92   22.60
  -3  -4   9  579.32   18.07
   3   4  -9  545.48   22.17
   3   4 -10  569.30   23.82
  -3  -4  10  580.93   23.96
  -3  -4  10  601.07   18.06
  -3  -4  11  270.15   17.95
   3   4 -11  290.30   18.91
   3   4 -12  211.21   17.51
  -3  -4  12  201.52   16.70
  -3  -4  13  222.29   18.10
   3   4 -13  205.72   18.28
  -3  -4  14  119.78   16.37
   3   4 -14  142.82   18.93
  -3  -4  15   86.22   14.79
   3   4 -15   88.19   15.47
  -3  -3   1 1189.73   19.75
  -3  -3   1 1225.99   27.28
   3   3  -1 1286.96   23.79
  -3  -3   2  606.16   19.05
   3   3  -2  678.92   17.23
  -3  -3   2  625.09   14.33
  -3  -3   3  913.65   18.77
  -3  -3   3  833.82   21.81
  -3  -3   3  926.99   21.08
  -3  -3   4 1054.25   23.61
  -3  -3   4  981.85   23.61
  -3  -3   4 1032.88   21.34
  -3  -3   5 1019.13   22.63
  -3  -3   5  994.90   23.55
  -3  -3   5 1056.21   24.79
   3   3  -6  434.47   15.93
  -3  -3   6  477.04   17.37
  -3  -3   6  429.34   15.39
  -3  -3   7  493.19   18.61
  -3  -3   7  501.30   16.33
   3   3  -7  510.34   18.78
  -3  -3   8  306.57   12.77
  -3  -3   8  288.26   15.45
   3   3  -8  295.79   15.93
  -3  -3   9  384.30   18.39
   3   3  -9  396.68   19.35
  -3  -3   9  423.58   14.46
  -3  -3  10  306.40   17.80
  -3  -3  10  323.45   12.19
   3   3 -10  363.90   19.99
   3   3 -11  315.82   19.45
  -3  -3  11  275.13   17.69
   3   3 -12  226.90   18.08
  -3  -3  12  215.93   16.91
   3   3 -13  116.32   15.93
  -3  -3  13  105.83   14.47
   3   3 -14  206.62   19.17
  -3  -3  14  217.45   18.74
   3   3 -15  139.44   18.91
  -3  -3  15  122.56   16.92
  -3  -2   1  605.90   18.29
   3   2  -1  697.26   15.60
  -3  -2   1  642.68   14.45
  -3  -2   2 1472.18   23.82
  -3  -2   2 1443.80   24.57
  -3  -2   2 1442.51   27.94
  -3  -2   3 1084.04   23.85
  -3  -2   3 1134.96   21.46
  -3  -2   3 1160.10   22.58
  -3  -2   4 1184.27   24.79
  -3  -2   4 1165.16   22.91
  -3  -2   4 1200.68   24.24
  -3  -2   5  897.20   20.98
  -3  -2   5  904.58   21.70
  -3  -2   5  908.71   21.50
  -3  -2   6  646.01   19.28
  -3  -2   6  695.98   19.68
  -3  -2   6  685.04   18.31
  -3  -2   7  368.96   15.71
  -3  -2   7  380.61   13.39
   3   2  -7  362.98   15.69
   3   2  -8   95.29   10.63
  -3  -2   8   96.88   10.01
  -3  -2   8  104.90    7.48
  -3  -2   9   33.67    4.99
  -3  -2   9   24.36    6.67
   3   2  -9   29.96    8.10
   3   2 -10  241.23   16.85
  -3  -2  11  600.75   24.45
   3   2 -11  660.84   26.83
   3   2 -12  670.42   28.29
  -3  -2  12  642.34   26.62
   3   2 -13  193.82   18.14
  -3  -2  13  195.82   17.65
   3   2 -14  253.92   20.54
  -3  -2  14  230.87   19.72
  -3  -2  15   92.88   16.13
   3   2 -15   90.39   16.05
  -3  -1   1  295.24   12.63
  -3  -1   1  297.66   10.59
   3   1  -1  344.29    9.84
  -3  -1   2  468.38   13.28
  -3  -1   2  483.65   12.20
  -3  -1   2  456.96   15.07
  -3  -1   3  477.29   13.97
  -3  -1   3  481.11   13.14
  -3  -1   3  450.58   14.67
  -3  -1   4 1086.27   22.14
  -3  -1   4 1056.30   22.40
  -3  -1   4 1064.58   21.62
  -3  -1   5  435.45   14.45
  -3  -1   5  429.90   13.76
  -3  -1   5  413.23   14.32
  -3  -1   6  710.72   17.29
  -3  -1   6  669.27   19.21
  -3  -1   6  700.52   19.45
  -3  -1   7  517.28   13.86
  -3  -1   7  477.79   17.54
  -3  -1   7  498.89   17.59
  -3  -1   8  747.77   22.75
   3   1  -8  790.17   24.08
   3   1  -8  830.17   16.77
   3   1  -9  304.29    8.87
   3   1  -9  329.84   17.49
  -3  -1   9  290.52   15.84
   3   1 -10  115.94   13.15
  -3  -1  10  123.62   12.30
  -3  -1  11  489.56   22.49
   3   1 -11  527.23   24.13
   3   1 -12  168.46   16.84
  -3  -1  12  147.59   15.32
  -3  -1  13  628.19   27.91
   3   1 -13  641.14   29.02
  -3  -1  14  301.25   21.46
   3   1 -14  312.15   22.37
  -3  -1  15  169.96   18.41
   3   1 -15  166.77   18.79
  -3   0   1  841.89   17.99
  -3   0   1  821.29   19.55
  -3   0   2  257.68   10.62
  -3   0   2  229.82   10.63
  -3   0   2  262.99    8.20
  -3   0   3  646.49   14.48
  -3   0   3  655.77   16.72
  -3   0   3  600.35   15.98
  -3   0   4  482.46   13.59
  -3   0   4  481.75   14.97
   3   0  -4  492.32   14.12
  -3   0   5 1276.14   24.39
   3   0  -5 1275.46   22.75
  -3   0   5 1275.54   25.43
  -3   0   6  324.53   13.78
  -3   0   6  319.31   13.11
   3   0  -6  345.91   10.99
  -3   0   7  729.88   21.03
  -3   0   7  724.29   21.30
   3   0  -7  785.38   15.68
  -3   0   8  768.88   23.03
   3   0  -8  818.44   14.49
   3   0  -8  835.04   24.60
   3   0  -9  622.39   11.07
  -3   0   9  579.15   21.50
   3   0  -9  616.98   22.90
   3   0 -10  938.27   29.58
  -3   0  10  904.23   28.40
  -3   0  11  499.83   22.93
   3   0 -11  539.32   24.54
   3   0 -12  269.15   19.64
  -3   0  12  284.59   19.15
   3   0 -13  161.16   17.27
  -3   0  13  189.57   17.31
  -3   0  14  221.58   19.25
   3   0 -14  199.11   19.28
   3   0 -15  143.26   19.36
  -3   0  15  138.71   18.67
  -3   1   0  445.48   13.03
   3  -1   0  503.94   15.52
   3  -1   0  547.40    8.01
  -3   1   1  715.43   10.79
   3  -1  -1  675.38   17.16
  -3   1   1  664.92   16.40
  -3   1   2  982.10   20.50
  -3   1   2  977.98   16.03
   3  -1  -2  925.56   19.86
  -3   1   3  775.05   15.37
   3  -1  -3  750.44   17.53
  -3   1   3  797.70   18.93
  -3   1   4 1082.80   22.71
   3  -1  -4 1072.54   20.57
  -3   1   4 1101.01   20.43
   3  -1  -5 1192.13   20.96
  -3   1   5 1181.31   22.80
  -3   1   5 1191.80   24.78
  -3   1   6  611.82   17.81
   3  -1  -6  663.25   14.73
  -3   1   6  627.65   18.88
  -3   1   7  928.68   23.59
  -3   1   7  931.01   24.17
   3  -1  -7  956.68   16.84
  -3   1   8  844.05   24.65
   3  -1  -8  864.07   15.22
  -3   1   8  810.90   23.94
   3  -1  -9  334.03   17.59
  -3   1   9  308.61   16.49
  -3   1  10  710.51   25.68
   3  -1 -10  765.36   26.92
  -3   1  11  432.35   21.76
   3  -1 -11  418.25   21.96
  -3   1  12  682.37   28.23
   3  -1 -12  672.05   28.25
  -3   1  13  139.78   15.80
   3  -1 -13  117.70   16.24
  -3   1  14  196.30   18.66
   3  -1 -14  156.03   17.83
  -3   1  15  158.59   18.31
   3  -1 -15  169.99   18.93
  -3   2   0  989.67   19.78
   3  -2   0 1073.36   22.51
  -3   2   1  620.95    9.00
   3  -2  -1  625.17   16.97
  -3   2   1  609.60   15.82
  -3   2   2  701.49   12.30
  -3   2   2  660.65   17.17
   3  -2  -2  667.09   17.12
  -3   2   3  521.33   12.12
   3  -2  -3  523.61   15.02
  -3   2   3  548.70   16.17
  -3   2   4 2723.63   38.15
  -3   2   4 2557.32   31.85
   3  -2  -4 2707.06   34.64
  -3   2   5  763.29   18.27
   3  -2  -5  841.03   17.77
  -3   2   5  840.62   21.20
   3  -2  -6  505.95   13.41
  -3   2   6  451.98   15.66
  -3   2   6  508.51   17.39
  -3   2   7  501.21   17.89
   3  -2  -7  580.45   13.86
  -3   2   7  547.53   18.99
  -3   2   8  499.90   19.40
  -3   2   8  494.16   19.16
   3  -2  -8  531.18   12.44
  -3   2   9  724.81   24.62
   3  -2  -9  787.56   25.78
  -3   2  10  178.94   14.79
   3  -2 -10  180.93   15.09
  -3   2  11  876.13   30.64
   3  -2 -11  831.77   29.70
  -3   2  12  227.38   17.84
   3  -2 -12  231.95   18.70
  -3   2  13  232.45   18.99
   3  -2 -13  204.66   19.30
  -3   2  14  130.18   17.56
   3  -2 -14  138.61   18.27
  -3   2  15   99.96   16.15
   3  -2 -15  108.30   17.48
   3  -3   0  864.33   20.83
  -3   3   0  812.96   18.43
  -3   3   1 1690.25   17.16
  -3   3   1 1576.23   26.51
   3  -3  -1 1651.03   28.78
  -3   3   2  909.72   13.86
   3  -3  -2  987.21   21.74
  -3   3   2 1002.32   21.53
   3  -3  -3 1082.58   22.35
  -3   3   3 1112.31   23.40
  -3   3   3  989.02   17.10
   3  -3  -4  612.59   16.55
  -3   3   4  563.28   14.53
  -3   3   5  478.62   16.55
   3  -3  -5  464.12   14.19
  -3   3   5  427.74   14.20
  -3   3   6  297.21   13.27
   3  -3  -6  304.02   11.36
  -3   3   6  291.89   13.81
   3  -3  -7  769.43   17.45
  -3   3   7  696.28   21.45
  -3   3   7  736.08   22.13
  -3   3   8  864.26   25.51
  -3   3   8  919.86   26.17
   3  -3  -8  933.51   18.38
  -3   3   9  234.58   15.40
   3  -3  -9  235.16   15.90
   3  -3 -10  202.42   15.59
  -3   3  10  167.16   14.33
  -3   3  11  340.40   19.95
   3  -3 -11  332.63   20.15
   3  -3 -12  303.85   20.66
  -3   3  12  276.30   19.37
  -3   3  13  272.35   20.32
   3  -3 -13  265.15   20.93
  -3   3  14  237.96   20.65
   3  -3 -14  206.88   20.20
   3  -3 -15   99.08   16.40
  -3   3  15   98.29   16.16
  -3   4   0   89.61    7.58
   3  -4   0  106.70    9.29
  -3   4   1  625.68   16.78
  -3   4   1  697.25   11.81
   3  -4  -1  669.40   19.26
  -3   4   1  661.46   15.36
  -3   4   2 1287.76   25.12
   3  -4  -2 1186.31   25.11
  -3   4   2 1220.94   18.89
  -3   4   3 1313.07   21.94
   3  -4  -3 1333.80   26.44
  -3   4   3 1410.85   27.11
  -3   4   4  747.04   20.21
  -3   4   4  719.32   17.52
   3  -4  -4  775.72   19.77
  -3   4   5  530.46   16.40
   3  -4  -5  551.72   16.60
  -3   4   5  568.14   18.36
  -3   4   6  430.60   16.75
   3  -4  -6  451.88   14.95
  -3   4   6  404.61   15.78
  -3   4   7  607.25   20.60
   3  -4  -7  634.14   17.23
  -3   4   7  611.08   20.78
  -3   4   8  704.98   23.33
  -3   4   8  721.29   23.86
   3  -4  -8  787.91   18.32
   3  -4  -9   63.63   10.16
  -3   4   9   63.14   10.04
  -3   4  10  367.56   20.21
   3  -4 -10  420.31   20.96
  -3   4  11  218.26   16.95
   3  -4 -11  218.45   17.49
  -3   4  12  182.91   16.72
   3  -4 -12  191.64   18.04
  -3   4  13  182.90   17.72
   3  -4 -13  187.12   18.13
  -3   4  14  181.18   18.60
   3  -4 -14  192.19   19.64
  -3   5   0  153.85    9.49
  -3   5   0  184.31    6.32
   3  -5   0  173.54   11.50
  -3   5   1  789.71   15.06
   3  -5  -1  746.14   21.37
  -3   5   1  697.84   18.46
  -3   5   2 1371.39   26.70
  -3   5   2 1488.72   23.94
   3  -5  -2 1371.70   28.85
  -3   5   3  659.23   19.04
  -3   5   3  707.68   17.00
  -3   5   3  643.57   18.50
   3  -5  -3  644.00   19.58
  -3   5   4  949.91   23.41
  -3   5   4  973.09   21.86
   3  -5  -4  978.82   24.09
  -3   5   5  685.68   19.68
  -3   5   5  640.65   19.91
   3  -5  -5  698.74   20.29
  -3   5   6  467.19   17.56
   3  -5  -6  491.54   16.88
  -3   5   6  441.29   17.28
  -3   5   7  566.18   20.43
  -3   5   7  575.41   20.81
   3  -5  -7  661.47   19.04
  -3   5   8  126.33   12.13
  -3   5   8  141.75   12.56
   3  -5  -8  140.42    9.31
  -3   5   9  329.55   18.57
   3  -5  -9  345.24   18.74
  -3   5  10  375.66   20.41
   3  -5 -10  408.80   21.04
  -3   5  11  468.23   23.91
   3  -5 -11  507.23   24.17
  -3   5  12  209.66   18.02
   3  -5 -12  228.57   18.50
  -3   5  13  146.92   17.25
   3  -5 -13  119.59   16.38
  -3   5  14  208.14   20.32
   3  -5 -14  207.92   19.63
  -3   6   0  223.98   11.67
   3  -6   0  234.06   13.44
  -3   6   0  272.45    9.17
  -3   6   1  444.45   15.42
  -3   6   1  484.30   12.86
   3  -6  -1  456.15   18.22
  -3   6   2  631.20   18.70
   3  -6  -2  618.96   20.91
  -3   6   2  667.13   16.51
  -3   6   3  972.54   21.80
   3  -6  -3  994.70   26.32
  -3   6   3  911.86   22.86
  -3   6   4 1157.60   25.62
  -3   6   4 1133.85   26.22
  -3   6   4 1053.94   26.44
   3  -6  -4 1172.01   28.77
  -3   6   5  787.95   22.44
   3  -6  -5  812.33   23.72
  -3   6   5  785.58   22.28
  -3   6   6  292.88   15.06
  -3   6   6  281.57   14.47
   3  -6  -6  307.73   14.85
  -3   6   7  119.95   11.35
   3  -6  -7  122.90   10.39
  -3   6   7  118.93   11.69
  -3   6   8  236.07   15.64
   3  -6  -8  247.43   12.56
  -3   6   8  229.65   15.04
  -3   6   9  555.39   23.90
   3  -6  -9  598.40   24.04
   3  -6 -10  666.43   26.36
  -3   6  10  611.71   26.08
   3  -6 -11  290.84   19.22
  -3   6  11  279.12   19.35
   3  -6 -12  194.10   17.68
  -3   6  12  167.66   16.94
  -3   6  13  178.26   18.39
   3  -6 -13  188.83   18.40
  -3   7   0  496.76   16.92
   3  -7   0  515.03   20.84
  -3   7   0  594.28   15.43
  -3   7   1  746.76   17.98
  -3   7   1  639.63   19.13
   3  -7  -1  617.98   22.20
  -3   7   2  355.13   14.75
   3  -7  -2  345.67   17.46
  -3   7   2  401.20   14.14
  -3   7   3  204.74   11.31
   3  -7  -3  203.93   14.17
  -3   7   3  193.29   11.68
  -3   7   4  277.41   13.83
  -3   7   4  249.80   14.31
   3  -7  -4  272.70   15.67
  -3   7   4  265.66   13.83
  -3   7   5  654.68   21.53
  -3   7   5  580.44   21.76
   3  -7  -5  642.99   22.86
  -3   7   5  603.26   20.22
  -3   7   6  484.46   18.88
  -3   7   6  496.10   20.02
   3  -7  -6  540.73   20.75
  -3   7   7  271.06   15.32
  -3   7   7  268.82   16.40
   3  -7  -7  284.69   15.13
  -3   7   8  390.02   18.89
   3  -7  -8  415.31   17.16
  -3   7   8  351.89   19.38
  -3   7   9  556.03   24.76
   3  -7  -9  570.82   23.83
  -3   7  10  383.45   21.85
   3  -7 -10  421.55   21.52
  -3   7  11  224.12   18.94
   3  -7 -11  220.24   17.92
  -3   7  12   84.78   14.27
   3  -7 -12   98.09   15.18
  -3   8   0  169.59   10.34
  -3   8   0  137.60   10.38
   3  -8   0  153.68   14.11
  -3   8   1  619.97   19.48
   3  -8  -1  638.87   24.68
  -3   8   1  738.25   19.94
  -3   8   2 1038.30   24.51
   3  -8  -2  920.82   29.22
  -3   8   2  915.24   23.76
  -3   8   3  375.79   15.76
  -3   8   3  389.58   16.28
   3  -8  -3  366.33   19.28
   3  -8  -4  281.49   17.04
  -3   8   4  314.72   15.76
  -3   8   4  251.76   13.73
  -3   8   5  177.28   12.34
  -3   8   5  201.30   13.96
   3  -8  -5  207.91   15.42
  -3   8   5  173.63   13.88
  -3   8   6  163.10   12.32
  -3   8   6  186.78   14.43
   3  -8  -6  161.17   13.26
  -3   8   7  277.78   17.31
   3  -8  -7  246.01   15.35
  -3   8   7  260.68   15.35
   3  -8  -8  332.97   16.84
  -3   8   8  299.14   19.21
  -3   8   8  304.47   17.41
  -3   8   9  369.86   21.75
   3  -8  -9  350.36   19.41
   3  -8 -10  311.09   19.46
  -3   8  10  306.29   21.05
  -3   8  11  228.80   19.34
   3  -8 -11  219.69   18.14
  -3   9   0  199.37   12.55
  -3   9   0  247.69   13.42
   3  -9   0  194.74   16.46
  -3   9   1  330.15   15.50
   3  -9  -1  260.65   18.14
  -3   9   1  273.02   14.15
  -3   9   2  233.63   13.36
  -3   9   2  264.08   14.39
   3  -9  -2  235.86   17.43
   3  -9  -3  358.77   20.56
  -3   9   3  353.22   15.83
  -3   9   3  384.55   17.76
  -3   9   4  622.03   20.88
  -3   9   4  704.11   24.54
   3  -9  -4  614.15   25.72
  -3   9   5  392.37   20.42
   3  -9  -5  418.61   21.65
  -3   9   5  436.98   20.76
  -3   9   5  384.89   17.27
  -3   9   6  242.48   17.30
  -3   9   6  223.59   14.12
  -3   9   6  227.46   17.47
   3  -9  -6  232.47   16.71
  -3   9   7  105.48   11.50
   3  -9  -7  111.99   12.59
  -3   9   7  120.60   14.28
  -3   9   8  170.96   16.67
   3  -9  -8  168.00   13.76
  -3   9   9  165.67   17.27
   3  -9  -9  176.68   15.51
  -3   9  10  309.33   22.36
   3  -9 -10  306.83   19.72
   3 -10   0  268.19   19.51
  -3  10   0  332.43   16.88
  -3  10   0  264.29   14.35
  -3  10   1  326.68   17.28
  -3  10   1  274.58   14.44
   3 -10  -1  260.17   18.61
  -3  10   2  123.77   11.02
   3 -10  -2  142.05   15.80
  -3  10   2  149.61   13.29
  -3  10   3  371.31   16.71
  -3  10   3  465.60   20.90
   3 -10  -3  416.94   23.24
  -3  10   4  362.09   16.64
   3 -10  -4  402.32   22.68
  -3  10   4  465.92   22.02
  -3  10   5  414.41   21.80
   3 -10  -5  399.70   22.59
  -3  10   5  363.86   17.08
  -3  10   6  169.98   17.12
   3 -10  -6  186.63   16.06
  -3  10   6  191.25   13.84
  -3  10   6  218.55   17.73
  -3  10   7  224.07   15.27
   3 -10  -7  227.15   17.03
  -3  10   7  245.52   19.30
   3 -10  -8   98.83   15.55
   3 -10  -8  105.84   12.88
  -3  10   8  137.05   16.89
  -3  10   9  333.61   23.49
  -3  11   0  337.42   18.62
   3 -11   0  255.78   19.70
  -3  11   0  308.29   15.60
  -3  11   1  120.30   11.25
   3 -11  -1  131.36   17.42
  -3  11   1  139.60   13.94
  -3  11   2  193.57   16.13
   3 -11  -2  184.22   17.99
  -3  11   2  180.51   12.66
  -3  11   3  276.53   15.09
  -3  11   3  308.74   19.80
   3 -11  -3  264.29   20.56
  -3  11   4  485.58   24.11
   3 -11  -4  427.04   24.64
  -3  11   4  411.83   24.15
   3 -11  -5  368.13   22.83
  -3  11   5  397.02   23.19
  -3  11   6  420.84   24.56
   3 -11  -6  357.66   22.07
  -3  11   6  372.70   23.67
  -3  11   7  238.50   20.02
   3 -11  -7  203.70   17.80
  -3  11   8  116.79   17.06
   3 -11  -8   88.80   13.75
  -3  12   0  322.66   19.70
   3 -12   0  266.58   22.20
  -3  12   1  287.94   19.28
   3 -12  -1  234.17   21.15
   3 -12  -2  269.39   22.10
  -3  12   2  339.59   21.46
   3 -12  -3  212.81   20.24
  -3  12   3  267.18   19.93
  -3  12   4  263.30   20.65
   3 -12  -4  202.44   19.70
   3 -12  -5  127.63   17.84
  -3  12   5  170.80   18.80
  -3  12   6  350.93   24.74
  -3  12   6  290.67   23.32
   3 -12  -6  278.33   21.72
  -3  13   0  229.36   18.77
   3 -13   0  170.65   20.02
  -3  13   1  277.27   20.38
   3 -13  -1  224.12   21.96
  -3  13   2  158.48   17.78
   3 -13  -2  147.59   20.24
  -3  13   3  279.96   22.12
   3 -13  -3  264.88   23.19
  -2 -12   1  161.56   19.57
   2  12  -1  151.34   17.73
  -2 -12   2   84.75   15.12
   2  12  -2  140.22   17.31
  -2 -12   3  155.80   19.07
   2  12  -3  186.70   18.74
  -2 -12   4  236.70   21.82
   2  12  -4  267.78   20.98
  -2 -12   5  188.94   20.30
   2  12  -5  188.40   18.99
  -2 -12   6  237.59   21.85
   2  12  -6  256.58   21.72
  -2 -12   7  128.59   18.86
   2  12  -7  117.80   16.57
  -2 -12   8   52.22   13.58
  -2 -11   1  333.01   23.51
   2  11  -1  333.31   21.18
   2  11  -2  241.77   18.83
  -2 -11   2  211.63   18.93
  -2 -11   3  300.38   21.81
   2  11  -3  361.86   21.74
   2  11  -4  251.51   19.06
  -2 -11   4  243.95   20.72
  -2 -11   5  225.54   20.33
   2  11  -5  218.66   18.46
  -2 -11   6  212.79   19.90
   2  11  -6  234.73   19.06
  -2 -11   7  126.41   17.81
   2  11  -7  144.21   18.04
   2  11  -8  116.13   16.44
  -2 -11   8  107.61   16.35
   2  11  -9  108.05   16.88
  -2 -11   9   96.07   15.61
  -2 -11  10   81.79   15.09
  -2 -11  10   77.02   14.20
  -2 -10   1  181.85   17.60
   2  10  -1  210.47   17.04
  -2 -10   2  136.27   15.96
   2  10  -2  164.12   15.75
  -2 -10   3  362.26   22.78
   2  10  -3  404.09   21.12
  -2 -10   4  254.75   19.12
   2  10  -4  313.46   19.21
  -2 -10   5  146.52   15.43
   2  10  -5  176.18   16.05
  -2 -10   6  167.64   17.09
   2  10  -6  203.24   17.42
  -2 -10   7  104.23   15.33
   2  10  -7  129.61   15.97
  -2 -10   8  210.63   17.73
  -2 -10   8  213.77   18.22
  -2 -10   9  180.02   17.58
  -2 -10   9  172.07   17.22
  -2 -10  10  181.32   18.36
  -2 -10  10  208.24   18.17
  -2 -10  11  109.58   16.50
  -2 -10  11  121.03   14.95
   2   9  -1  100.77   12.79
  -2  -9   1   83.10   12.46
  -2  -9   2  359.35   21.10
   2   9  -2  394.71   19.87
  -2  -9   3  371.96   21.64
   2   9  -3  421.18   20.40
   2   9  -4  182.17   14.90
  -2  -9   4  180.02   16.26
  -2  -9   5  103.75   14.37
  -2  -9   6  160.26   15.51
   2   9  -6  191.32   16.44
  -2  -9   7  567.27   24.35
  -2  -9   7  563.55   25.63
   2   9  -7  560.00   23.31
  -2  -9   8  145.65   15.19
   2   9  -8  134.01   12.26
  -2  -9   8  145.85   15.05
   2   9  -9  215.90   15.79
  -2  -9   9  182.00   15.78
  -2  -9   9  231.23   18.44
  -2  -9  10  172.34   17.56
  -2  -9  10  185.82   16.07
   2   9 -10  204.31   16.22
  -2  -9  11  200.10   19.65
   2   9 -11  200.58   17.46
  -2  -9  11  195.91   15.97
  -2  -9  12  190.24   19.54
   2   9 -12  187.82   17.92
  -2  -9  13   76.25   14.62
   2   9 -13   95.37   15.31
   2   8  -1   66.15   10.41
  -2  -8   1   57.54   10.06
   2   8  -2  103.88   11.92
  -2  -8   2   92.73   12.61
  -2  -8   3  426.55   20.90
   2   8  -3  502.94   20.29
   2   8  -4  324.21   11.13
   2   8  -4  498.27   20.44
  -2  -8   4  408.33   20.97
  -2  -8   5  283.36   18.00
   2   8  -5  341.03   13.37
   2   8  -5  326.88   17.60
  -2  -8   6  645.64   23.74
  -2  -8   6  585.97   24.52
   2   8  -6  744.95   21.68
   2   8  -7  528.81   19.87
  -2  -8   7  493.52   21.96
  -2  -8   7  421.77   20.84
  -2  -8   8  160.19   14.89
  -2  -8   8  156.53   14.32
   2   8  -8  185.45   13.93
  -2  -8   9  178.20   16.42
  -2  -8   9  157.10   14.01
   2   8  -9  181.13   14.86
  -2  -8  10  266.62   19.47
  -2  -8  10  271.42   16.83
   2   8 -10  290.56   18.48
  -2  -8  11  246.45   19.54
  -2  -8  11  221.67   14.80
   2   8 -11  282.78   19.40
  -2  -8  12  281.29   21.42
   2   8 -12  290.57   20.87
  -2  -8  13  146.25   17.93
   2   8 -13  168.09   17.79
  -2  -8  14  164.40   19.09
   2   8 -14  196.61   19.78
  -2  -7   1  704.42   24.71
   2   7  -1  786.47   23.23
  -2  -7   2  174.10   13.20
   2   7  -2  188.54   12.80
   2   7  -3  133.65    6.45
  -2  -7   3  122.18   12.12
   2   7  -3  132.67   11.47
   2   7  -4  441.09   13.30
   2   7  -4  395.47   17.33
  -2  -7   4  349.58   17.99
  -2  -7   5  365.61   16.88
  -2  -7   5  349.75   17.98
   2   7  -5  419.41   14.59
  -2  -7   6 1315.72   33.70
  -2  -7   6 1458.13   33.91
   2   7  -6 1526.84   30.16
  -2  -7   7  203.18   14.29
  -2  -7   7  210.39   14.97
   2   7  -7  212.33   12.95
   2   7  -8  266.50   15.18
  -2  -7   8  257.76   16.68
  -2  -7   8  268.21   15.43
  -2  -7   9  331.87   16.71
  -2  -7   9  333.80   19.76
   2   7  -9  340.96   17.96
   2   7 -10  537.46   22.94
  -2  -7  10  515.98   24.63
  -2  -7  10  543.96   20.56
  -2  -7  11  416.00   17.39
  -2  -7  11  527.84   25.42
   2   7 -11  517.05   24.24
   2   7 -12  132.78   16.13
  -2  -7  12  135.53   15.85
   2   7 -13  173.03   17.82
  -2  -7  13  120.58   16.13
   2   7 -14  145.20   19.27
  -2  -7  14  118.01   16.63
  -2  -6   1  563.76   20.30
   2   6  -1  641.10   19.48
  -2  -6   2  635.96   21.57
   2   6  -2  740.44   12.33
   2   6  -2  704.49   11.85
   2   6  -2  691.45   20.17
   2   6  -3 1102.96   25.76
  -2  -6   3 1057.14   27.86
   2   6  -3 1074.56   18.44
  -2  -6   4  322.46   14.54
  -2  -6   4  298.51   15.31
   2   6  -4  319.43   11.24
  -2  -6   5 1374.93   30.29
  -2  -6   5 1258.74   30.30
   2   6  -5 1271.85   24.47
   2   6  -6  415.97   15.46
  -2  -6   6  421.82   17.86
  -2  -6   6  386.72   16.97
  -2  -6   7  474.09   18.29
  -2  -6   7  523.05   20.62
   2   6  -7  502.98   18.08
  -2  -6   8  223.10   15.24
  -2  -6   8  207.43   12.39
   2   6  -8  226.77   14.00
  -2  -6   9  356.71   18.97
  -2  -6   9  329.59   15.04
   2   6  -9  367.55   17.84
  -2  -6  10  466.91   22.50
  -2  -6  10  408.46   15.94
   2   6 -10  447.47   21.12
  -2  -6  11  333.73   20.09
  -2  -6  11  280.06   12.95
   2   6 -11  354.23   20.00
   2   6 -12  308.35   20.64
  -2  -6  12  277.04   19.28
   2   6 -13  165.06   18.01
  -2  -6  13  175.81   17.42
  -2  -6  14  131.18   16.35
   2   6 -14  125.52   17.14
   2   6 -15   91.14   16.78
  -2  -6  15   73.98   14.41
   2   5  -1  583.74    7.78
  -2  -5   1  648.88   20.32
   2   5  -1  644.07    9.65
   2   5  -1  711.24   18.84
  -2  -5   2  662.99   20.48
   2   5  -2  664.18   12.18
   2   5  -2  737.71   19.36
  -2  -5   3  905.70   21.75
  -2  -5   3  868.04   23.23
   2   5  -3  878.20   16.29
  -2  -5   4  767.71   20.62
  -2  -5   4  709.61   20.82
   2   5  -4  746.65   16.80
   2   5  -5 1160.88   23.10
  -2  -5   5 1172.25   26.55
  -2  -5   5 1077.92   25.36
  -2  -5   6  661.39   20.89
  -2  -5   6  620.79   19.10
   2   5  -6  636.56   18.73
  -2  -5   7  647.78   21.67
  -2  -5   7  608.17   18.52
   2   5  -7  659.08   20.44
  -2  -5   8  412.27   18.52
  -2  -5   8  380.36   14.51
   2   5  -8  388.82   17.39
   2   5  -9  144.22   12.63
  -2  -5   9  138.45   12.68
  -2  -5   9  134.78    9.22
  -2  -5  10  135.12    8.97
  -2  -5  10  136.96   13.12
   2   5 -10  157.61   14.32
  -2  -5  11   95.30   12.63
   2   5 -11  122.62   13.64
  -2  -5  12  355.80   20.69
   2   5 -12  399.28   22.35
  -2  -5  13  211.52   17.66
   2   5 -13  242.20   19.33
  -2  -5  14  272.61   20.40
   2   5 -14  247.38   20.54
  -2  -5  15  108.22   15.73
   2   5 -15  135.57   18.65
  -2  -4   1 1015.53   13.76
  -2  -4   1  948.72   22.72
   2   4  -1 1036.48   21.30
   2   4  -2 1436.76   25.90
  -2  -4   2 1259.15   25.94
   2   4  -2 1437.92   18.96
  -2  -4   3  448.48   15.46
  -2  -4   3  457.86   14.62
   2   4  -3  505.87   12.48
  -2  -4   4 1939.34   32.13
  -2  -4   4 1859.13   31.29
   2   4  -4 2151.45   29.78
   2   4  -5  415.92   14.07
  -2  -4   5  413.02   15.14
  -2  -4   5  357.91   13.40
  -2  -4   6  785.00   21.60
  -2  -4   6  717.07   18.33
   2   4  -6  780.18   20.59
  -2  -4   7  266.75   11.24
  -2  -4   7  276.25   14.09
   2   4  -7  282.35   14.07
  -2  -4   8  270.77   14.77
  -2  -4   8  257.37   10.83
   2   4  -8  274.28   15.06
  -2  -4   9  280.41   15.78
  -2  -4   9  261.02   10.64
   2   4  -9  281.01   15.97
   2   4 -10   60.56   10.23
  -2  -4  10   55.46    9.30
  -2  -4  10   69.79    6.27
  -2  -4  11  388.46   20.09
   2   4 -11  392.32   20.60
  -2  -4  12  369.80   20.56
   2   4 -12  383.76   21.43
  -2  -4  13  323.82   20.45
   2   4 -13  381.49   22.49
  -2  -4  14  256.95   19.73
   2   4 -14  263.07   20.67
  -2  -4  15  206.72   19.29
   2   4 -15  217.26   21.03
  -2  -4  16   52.73   12.54
   2   4 -16   60.51   14.28
  -2  -3   1 1129.40   16.48
  -2  -3   1 1078.84   22.60
   2   3  -1 1204.75   21.46
  -2  -3   2   47.60    4.39
  -2  -3   2   48.71    5.98
  -2  -3   2   44.16    6.51
  -2  -3   3  353.29   12.76
  -2  -3   3  364.78   10.61
  -2  -3   3  345.77   12.05
  -2  -3   4  371.76   12.71
  -2  -3   4  402.69   13.41
   2   3  -4  430.22   12.89
  -2  -3   5 1527.17   28.03
  -2  -3   5 1494.91   25.58
   2   3  -5 1627.18   27.65
  -2  -3   6  883.38   22.09
  -2  -3   6  833.92   18.20
   2   3  -6  897.80   21.83
  -2  -3   7  468.87   13.25
  -2  -3   7  482.01   17.43
   2   3  -7  496.97   17.69
  -2  -3   8  541.78   19.52
   2   3  -8  567.44   20.39
  -2  -3   8  588.99   14.60
  -2  -3   9  425.90   18.52
  -2  -3   9  445.01   12.28
   2   3  -9  405.43   18.59
  -2  -3  10  270.45   16.08
  -2  -3  10  316.19    9.89
   2   3 -10  306.32   17.65
  -2  -3  11  397.65   20.01
   2   3 -11  367.69   20.40
  -2  -3  12  318.17   19.10
   2   3 -12  332.35   20.27
   2   3 -13  304.32   20.56
  -2  -3  13  290.46   19.40
  -2  -3  14  381.30   22.88
   2   3 -14  428.87   24.55
  -2  -3  15  340.22   23.05
   2   3 -15  340.37   23.63
  -2  -3  16   72.38   14.65
   2   3 -16   53.63   13.35
  -2  -2   1 1486.66   20.04
  -2  -2   1 1429.75   24.00
   2   2  -1 1637.50   24.14
  -2  -2   2  711.63   16.49
  -2  -2   2  731.63   14.01
  -2  -2   2  751.41   15.59
  -2  -2   3  513.22   13.41
  -2  -2   3  525.69   12.76
  -2  -2   3  508.02   13.73
  -2  -2   4  104.16    7.06
  -2  -2   4  116.67    7.64
  -2  -2   4  115.20    7.14
  -2  -2   5  768.69   18.80
  -2  -2   5  775.49   16.38
   2   2  -5  819.76   19.05
  -2  -2   6 1065.48   23.64
  -2  -2   6 1099.58   19.63
   2   2  -6 1122.73   24.20
  -2  -2   7  845.74   16.56
  -2  -2   7  820.77   22.00
   2   2  -7  844.84   22.60
  -2  -2   8 1183.77   28.04
  -2  -2   8 1308.10   20.84
   2   2  -8 1232.39   29.09
   2   2  -9  573.52   21.65
  -2  -2   9  570.24   20.91
  -2  -2   9  645.14   11.89
  -2  -2  10  640.72   23.44
   2   2 -10  639.37   24.01
  -2  -2  11  750.30   26.78
   2   2 -11  729.86   26.88
  -2  -2  12  458.11   22.62
   2   2 -12  470.93   23.34
  -2  -2  13  187.16   16.74
   2   2 -13  155.59   16.28
  -2  -2  14  156.38   16.44
   2   2 -14  164.36   17.30
  -2  -2  15  105.12   15.66
   2   2 -15  123.87   16.75
  -2  -2  16  240.51   21.27
   2   2 -16  229.37   21.19
  -2  -1   1  640.60   12.33
  -2  -1   1  650.36   12.30
  -2  -1   1  610.63   14.39
  -2  -1   2 1803.54   24.30
  -2  -1   2 1750.20   24.99
  -2  -1   2 1720.28   25.38
  -2  -1   3  871.07   16.76
  -2  -1   3  882.35   16.92
  -2  -1   3  856.49   16.60
  -2  -1   4 1133.51   20.88
  -2  -1   4 1122.58   20.96
  -2  -1   4 1137.25   19.38
  -2  -1   5 1941.58   26.97
  -2  -1   5 1932.95   30.17
  -2  -1   5 1970.72   30.32
   2   1  -6  856.31   20.85
  -2  -1   6  841.27   15.06
  -2  -1   6  783.27   19.90
  -2  -1   7  893.78   14.06
   2   1  -7  884.07   22.76
   2   1  -8  831.74   23.79
  -2  -1   8  746.65   22.18
   2   1  -8  838.91   10.88
  -2  -1   9  581.06   21.05
   2   1  -9  606.85   21.94
  -2  -1  10  358.50   18.10
   2   1 -10  354.23   18.69
  -2  -1  11  548.71   23.26
   2   1 -11  535.45   23.41
   2   1 -12  805.04   29.42
  -2  -1  12  800.37   29.22
  -2  -1  13  458.56   23.93
   2   1 -13  483.06   24.52
   2   1 -14  203.91   18.42
  -2  -1  14  230.16   19.04
  -2  -1  15   86.26   15.21
   2   1 -15   69.60   13.28
  -2  -1  16   73.98   15.20
   2   1 -16   56.49   13.12
  -2   0   1 1339.71   21.00
  -2   0   1 1471.14   21.14
  -2   0   1 1450.14   18.49
  -2   0   2 1254.99   18.54
  -2   0   2 1253.15   19.51
  -2   0   2 1209.20   19.18
  -2   0   3  750.47   15.48
  -2   0   3  781.10   15.05
  -2   0   3  694.86   13.56
  -2   0   4 1827.00   27.54
  -2   0   4 1826.40   26.70
   2   0  -4 1830.14   23.62
  -2   0   5 2401.77   33.96
  -2   0   5 2299.70   32.62
   2   0  -5 2394.42   27.00
  -2   0   6  636.69   17.85
   2   0  -6  663.89   10.65
  -2   0   7  319.52   14.01
   2   0  -7  313.47   14.02
   2   0  -7  342.69    6.45
   2   0  -8  816.66   23.40
  -2   0   8  777.16   22.72
  -2   0   9  711.44   23.30
   2   0  -9  766.57   24.09
   2   0 -10  451.29   20.56
  -2   0  10  462.44   20.43
  -2   0  11  238.23   16.51
  -2   0  12  411.21   21.86
   2   0 -12  410.13   21.90
  -2   0  13  259.09   19.09
   2   0 -13  240.39   18.57
  -2   0  14  257.89   19.95
   2   0 -14  251.58   19.66
  -2   0  15  290.58   22.32
   2   0 -15  240.06   20.28
  -2   0  16   79.30   15.31
   2   0 -16   67.15   13.91
  -2   1   0  704.76   13.34
   2  -1   0  774.92   15.43
  -2   1   1  741.23   10.72
  -2   1   1  751.83   14.86
   2  -1  -1  735.11   14.48
  -2   1   2 2530.88   27.36
   2  -1  -2 2393.17   27.97
  -2   1   2 2427.99   29.89
  -2   1   3  870.05   15.53
   2  -1  -3  906.79   15.16
  -2   1   4 1805.91   27.31
  -2   1   4 1652.25   24.52
   2  -1  -4 1784.69   21.65
  -2   1   5  556.73   15.67
  -2   1   5  546.38   15.20
   2  -1  -5  584.22   11.22
  -2   1   6  487.56   15.76
  -2   1   6  435.81   14.93
   2  -1  -6  490.10    9.52
   2  -1  -7  717.75   10.26
  -2   1   7  633.94   19.31
   2  -1  -7  731.28   20.62
  -2   1   8 1030.02   26.38
   2  -1  -8 1081.43   26.75
  -2   1   9  938.08   26.89
   2  -1  -9  991.31   27.48
  -2   1  10   70.32   10.64
   2  -1 -10   55.40    9.51
   2  -1 -11  408.79   20.70
   2  -1 -12  281.31   18.76
  -2   1  12  282.27   18.74
  -2   1  13  243.00   18.58
   2  -1 -13  266.23   19.25
  -2   1  14  220.97   19.54
   2  -1 -14  247.35   19.49
  -2   1  15  158.25   18.47
   2  -1 -15  150.83   17.43
  -2   1  16  189.65   20.05
   2  -1 -16  175.80   19.22
   2  -2   0   27.14    4.31
  -2   2   1  266.61    5.58
   2  -2  -1  292.12    9.79
  -2   2   2  859.40   13.30
  -2   2   2  922.32   17.56
   2  -2  -2  905.44   16.89
  -2   2   3 3265.67   38.48
  -2   2   3 3023.53   32.89
   2  -2  -3 3211.36   35.80
  -2   2   4 1826.73   27.93
  -2   2   4 1706.86   25.56
   2  -2  -4 1893.50   25.13
  -2   2   5 1604.44   27.20
  -2   2   5 1538.50   26.42
   2  -2  -5 1715.37   23.65
  -2   2   6  465.93   15.68
  -2   2   6  500.67   16.02
   2  -2  -6  521.64   11.20
  -2   2   7  456.73   16.76
   2  -2  -7  468.40   16.67
   2  -2  -7  446.45    9.03
  -2   2   8  929.76   25.40
   2  -2  -8  978.62   25.58
  -2   2   9  339.99   17.23
   2  -2  -9  344.37   17.17
  -2   2  10  212.87   15.11
   2  -2 -10  210.89   15.30
  -2   2  11  426.83   21.27
   2  -2 -11  407.49   20.83
  -2   2  12  351.13   20.82
   2  -2 -12  346.79   20.47
   2  -2 -13  195.71   17.24
  -2   2  13  219.51   18.06
  -2   2  14  191.61   18.04
   2  -2 -14  210.77   18.96
  -2   2  15  297.22   22.36
   2  -2 -15  261.74   21.55
  -2   3   0  880.09   16.23
  -2   3   0  964.24   13.19
   2  -3   0  935.67   19.38
   2  -3  -1  663.02   15.94
  -2   3   1  637.89   14.51
  -2   3   1  668.50   11.60
  -2   3   2  854.78   17.52
  -2   3   2  886.48   15.49
  -2   3   2  790.23   16.01
   2  -3  -2  833.27   17.62
  -2   3   3 1089.15   20.67
  -2   3   3 1113.53   19.59
   2  -3  -3 1082.46   20.12
  -2   3   4 1180.99   22.42
  -2   3   4 1196.18   22.30
   2  -3  -4 1200.34   21.38
  -2   3   5 2251.20   33.53
  -2   3   5 2210.19   33.83
   2  -3  -5 2306.16   31.98
  -2   3   6 1577.58   28.91
  -2   3   6 1522.99   29.26
   2  -3  -6 1614.14   24.39
  -2   3   7  472.46   16.89
  -2   3   7  448.25   16.94
   2  -3  -7  442.02   10.71
  -2   3   8  520.83   19.53
   2  -3  -8  550.14   19.56
   2  -3  -8  512.20   10.00
  -2   3   9   49.95    8.94
   2  -3  -9   44.46    8.73
  -2   3  10  667.16   24.88
   2  -3 -10  711.18   25.27
  -2   3  11  582.04   24.81
   2  -3 -11  588.24   24.83
  -2   3  12  503.15   24.39
   2  -3 -12  550.35   24.87
  -2   3  13  247.61   18.93
   2  -3 -13  259.95   19.52
  -2   3  14  136.47   16.11
   2  -3 -14  125.67   15.52
  -2   3  15  288.94   22.92
   2  -3 -15  289.26   22.39
  -2   4   0 1521.91   22.94
  -2   4   0 1662.98   20.83
   2  -4   0 1587.75   27.44
  -2   4   1  312.62   11.06
  -2   4   1  333.64    9.01
   2  -4  -1  316.36   12.49
  -2   4   2 2199.54   30.84
  -2   4   2 2286.63   31.12
   2  -4  -2 2211.98   33.08
  -2   4   3  652.26   16.32
  -2   4   3  663.54   15.78
   2  -4  -3  667.07   17.34
  -2   4   4 1143.70   22.61
  -2   4   4 1169.14   23.20
  -2   4   4 1039.89   22.45
   2  -4  -4 1179.09   23.30
  -2   4   5 1080.34   23.80
  -2   4   5 1080.24   22.91
   2  -4  -5 1138.87   22.44
  -2   4   6  466.67   15.82
  -2   4   6  448.44   16.32
   2  -4  -6  484.45   13.71
  -2   4   7  719.47   21.01
  -2   4   7  689.55   21.53
   2  -4  -7  688.61   15.73
  -2   4   8   98.68   10.41
   2  -4  -8   96.40    9.99
   2  -4  -8   96.68    6.01
  -2   4   9  803.46   26.16
   2  -4  -9  859.24   26.59
   2  -4  -9  808.73   17.23
   2  -4 -10  674.72   25.00
  -2   4  10  604.45   24.15
  -2   4  11  691.32   27.09
   2  -4 -11  741.88   27.57
  -2   4  12  263.73   19.12
   2  -4 -12  268.90   18.55
  -2   4  13  163.86   16.79
   2  -4 -13  177.46   16.59
  -2   4  14  289.25   21.67
   2  -4 -14  304.15   21.76
   2  -4 -15  200.50   18.99
  -2   5   0  260.83   10.26
  -2   5   0  284.86    8.86
   2  -5   0  270.52   12.82
  -2   5   1  533.51   12.76
  -2   5   1  519.39   14.10
   2  -5  -1  493.82   16.51
  -2   5   2  785.23   16.80
  -2   5   2  796.14   17.91
   2  -5  -2  780.02   20.50
  -2   5   3  757.53   17.85
  -2   5   3  764.13   17.94
   2  -5  -3  772.83   20.34
   2  -5  -4  420.19   14.85
  -2   5   4  396.41   13.58
  -2   5   4  393.37   13.99
  -2   5   4  361.36   14.00
  -2   5   5  558.72   16.76
  -2   5   5  567.90   17.96
  -2   5   5  509.16   17.43
   2  -5  -5  568.66   17.04
  -2   5   6  827.02   21.50
  -2   5   6  799.62   22.59
   2  -5  -6  818.21   20.09
  -2   5   7  537.96   18.77
  -2   5   7  542.24   19.92
   2  -5  -7  535.78   15.53
  -2   5   8  360.79   17.59
   2  -5  -8  359.70   16.71
   2  -5  -8  363.57   12.24
  -2   5   9  512.15   21.81
   2  -5  -9  566.38   21.87
   2  -5  -9  515.07   13.87
  -2   5  10  439.34   21.42
   2  -5 -10  465.91   21.62
  -2   5  11  357.29   20.91
   2  -5 -11  392.54   20.84
  -2   5  12  252.72   18.96
   2  -5 -12  221.71   17.90
  -2   5  13  180.15   17.65
   2  -5 -13  200.19   18.05
  -2   5  14  273.97   21.73
   2  -5 -14  257.29   20.59
  -2   6   0  168.11    8.85
  -2   6   0  176.39    8.21
   2  -6   0  176.69   11.55
  -2   6   1  616.80   15.85
  -2   6   1  643.00   15.44
   2  -6  -1  631.30   20.12
  -2   6   2  863.29   19.14
  -2   6   2  865.94   19.09
   2  -6  -2  860.72   23.33
  -2   6   3  893.00   20.07
  -2   6   3  934.44   21.20
   2  -6  -3  934.42   24.32
  -2   6   4  515.96   15.72
   2  -6  -4  535.47   18.46
  -2   6   4  534.63   17.19
  -2   6   5  285.87   12.53
  -2   6   5  280.51   13.90
  -2   6   5  245.44   13.45
   2  -6  -5  293.14   13.84
  -2   6   6  545.72   18.02
  -2   6   6  549.59   19.83
   2  -6  -6  581.49   18.63
  -2   6   7   95.52   10.55
   2  -6  -7   94.14    8.56
  -2   6   8  651.11   24.00
   2  -6  -8  716.36   23.61
   2  -6  -8  685.50   18.87
  -2   6   9  305.41   18.07
   2  -6  -9  331.08   17.67
   2  -6  -9  307.61   12.46
  -2   6  10  467.13   23.05
   2  -6 -10  517.16   22.90
  -2   6  11  272.73   19.52
   2  -6 -11  302.79   19.32
  -2   6  12  157.48   16.56
   2  -6 -12  151.84   15.76
  -2   6  13  361.69   23.60
   2  -6 -13  376.60   23.16
  -2   7   0  579.88   15.86
  -2   7   0  605.90   16.06
   2  -7   0  516.56   19.81
  -2   7   1  333.38   12.30
  -2   7   1  338.29   12.73
   2  -7  -1  334.12   16.34
  -2   7   2  474.27   14.56
  -2   7   2  459.44   15.25
   2  -7  -2  467.58   18.96
  -2   7   3  320.16   12.46
  -2   7   3  334.91   13.82
   2  -7  -3  345.46   16.53
   2  -7  -4  714.82   22.89
  -2   7   4  673.90   18.41
  -2   7   4  677.72   20.60
  -2   7   5 1595.29   33.74
   2  -7  -5 1569.93   34.15
  -2   7   5 1551.70   30.76
  -2   7   6  419.90   16.31
  -2   7   6  447.03   19.28
   2  -7  -6  439.00   17.76
  -2   7   6  407.66   18.46
  -2   7   7  270.61   16.28
   2  -7  -7  293.61   15.06
   2  -7  -7  284.18   14.21
  -2   7   8   26.72    7.73
   2  -7  -8   34.05    7.69
   2  -7  -8   35.24    6.78
  -2   7   9  175.18   15.25
   2  -7  -9  190.09   14.40
   2  -7  -9  160.09   10.87
  -2   7  10  454.12   23.27
   2  -7 -10  474.92   22.34
  -2   7  11  399.25   23.50
   2  -7 -11  409.57   21.87
  -2   7  12  279.40   21.21
   2  -7 -12  317.54   20.70
  -2   7  13  216.60   20.55
   2  -7 -13  243.70   19.61
  -2   8   0  463.19   14.94
  -2   8   0  551.98   17.34
   2  -8   0  441.82   19.61
  -2   8   1  527.47   15.80
  -2   8   1  559.01   17.85
   2  -8  -1  543.45   21.94
  -2   8   2  299.21   12.24
  -2   8   2  329.30   14.58
   2  -8  -2  306.60   16.69
  -2   8   3  210.49   10.80
  -2   8   3  230.87   12.99
   2  -8  -3  225.00   15.11
  -2   8   4  447.56   15.60
  -2   8   4  441.33   18.25
   2  -8  -4  451.48   20.03
  -2   8   5  681.33   23.40
   2  -8  -5  681.19   23.96
  -2   8   5  615.75   19.14
  -2   8   6  650.20   20.86
  -2   8   6  646.10   24.06
  -2   8   6  590.26   23.02
   2  -8  -6  657.54   23.16
  -2   8   7  771.59   27.36
   2  -8  -7  749.96   23.81
   2  -8  -7  735.12   24.17
  -2   8   8  316.57   19.04
   2  -8  -8  315.29   16.78
   2  -8  -8  287.84   15.50
  -2   8   9  152.68   15.78
   2  -8  -9  181.12   14.21
  -2   8  10  284.25   19.96
   2  -8 -10  307.66   18.71
  -2   8  11  192.95   18.21
   2  -8 -11  168.59   15.50
  -2   8  12  194.81   19.19
   2  -8 -12  188.52   16.60
  -2   9   0  360.75   13.80
  -2   9   0  396.16   16.72
   2  -9   0  321.85   18.76
  -2   9   1  408.18   14.44
  -2   9   1  461.52   18.21
   2  -9  -1  432.12   21.37
  -2   9   2  267.45   12.04
  -2   9   2  303.90   15.68
   2  -9  -2  294.13   18.26
  -2   9   3  421.54   15.09
  -2   9   3  481.50   19.63
   2  -9  -3  452.56   21.74
  -2   9   4  725.92   20.47
  -2   9   4  754.25   24.94
   2  -9  -4  775.20   27.63
  -2   9   5  330.93   14.66
  -2   9   5  364.78   18.74
   2  -9  -5  364.77   19.35
  -2   9   6  560.20   23.99
  -2   9   6  506.07   22.56
   2  -9  -6  529.54   22.49
  -2   9   7  423.35   22.23
  -2   9   7  382.34   20.62
   2  -9  -7  390.49   17.59
   2  -9  -7  406.59   19.84
  -2   9   8  256.82   18.68
   2  -9  -8  237.71   14.78
   2  -9  -8  269.23   16.44
  -2   9   9  203.78   18.41
  -2   9  10  186.27   18.29
  -2   9  11  250.95   21.53
  -2  10   0  403.49   14.86
  -2  10   0  483.32   20.04
   2 -10   0  413.03   22.41
   2 -10  -1  434.90   22.83
  -2  10   1  397.99   14.65
  -2  10   1  474.33   19.97
  -2  10   2  382.88   14.42
  -2  10   2  417.75   19.64
   2 -10  -2  399.84   22.06
  -2  10   3  440.44   15.84
  -2  10   3  459.87   20.88
   2 -10  -3  420.32   22.57
  -2  10   4  365.80   15.13
  -2  10   4  390.77   20.22
   2 -10  -4  342.76   20.66
  -2  10   5  344.54   20.20
   2 -10  -5  293.37   19.02
  -2  10   6  258.80   18.80
   2 -10  -6  241.65   17.73
  -2  10   7  295.62   20.74
  -2  10   7  238.94   18.12
   2 -10  -7  273.64   18.29
  -2  10   8  166.06   17.40
   2 -10  -8  148.93   14.26
  -2  10   9  139.15   16.88
  -2  11   0  322.37   15.79
  -2  11   0  375.98   19.90
   2 -11   0  298.63   20.70
  -2  11   1  317.04   18.94
   2 -11  -1  273.19   19.50
  -2  11   2  297.35   18.80
   2 -11  -2  273.95   20.29
  -2  11   3  294.70   18.79
   2 -11  -3  288.39   20.61
  -2  11   4  344.12   20.92
   2 -11  -4  335.69   22.29
  -2  11   5  168.01   16.57
   2 -11  -5  177.54   17.04
  -2  11   6  107.86   15.49
   2 -11  -6   80.90   13.64
  -2  11   7   75.69   13.53
  -2  11   7  128.35   22.71
   2 -11  -7   64.61   12.21
  -2  11   8  171.82   18.67
   2 -11  -8  155.74   15.58
  -2  12   0  218.24   17.72
   2 -12   0  181.28   18.78
  -2  12   1  375.91   21.79
   2 -12  -1  316.07   22.17
  -2  12   2  157.65   16.03
   2 -12  -2  144.04   17.18
  -2  12   3  136.90   16.57
   2 -12  -3  141.52   17.23
  -2  12   4  201.02   19.00
   2 -12  -4  201.16   19.23
  -2  12   5  154.62   18.46
   2 -12  -5  171.58   18.90
  -2  12   6   91.51   15.48
   2 -12  -6  101.31   16.06
  -2  13   0  189.29   18.56
   2 -13   0  185.70   19.90
  -2  13   1  202.47   19.22
   2 -13  -1  214.69   21.29
  -2  13   2  116.12   15.89
   2 -13  -2  116.32   18.35
  -2  13   3  164.53   18.67
   2 -13  -3  120.08   18.39
  -1 -13   1  347.56   25.85
   1  13  -1  354.29   23.64
  -1 -13   2  176.95   19.95
   1  13  -2  203.15   19.40
  -1 -13   3  177.21   19.91
   1  13  -3  193.36   19.82
  -1 -13   4  232.10   21.72
   1  13  -4  223.42   20.60
  -1 -13   5  101.06   17.47
   1  13  -5   97.59   15.02
   1  13  -6  155.01   18.52
  -1 -13   6  164.26   19.49
  -1 -12   1   97.31   15.82
   1  12  -1  108.11   14.83
  -1 -12   2   79.65   14.71
   1  12  -2  101.00   14.81
  -1 -12   3  222.43   20.20
   1  12  -3  232.42   18.89
  -1 -12   4  286.84   22.20
   1  12  -4  311.36   21.41
  -1 -12   5  213.37   19.86
   1  12  -5  189.96   18.53
  -1 -12   6   68.28   14.13
   1  12  -6   64.70   12.68
  -1 -12   7  114.95   17.65
   1  12  -7  123.24   15.94
  -1 -12   8  110.57   16.89
   1  12  -8  123.20   16.97
  -1 -12   9  153.70   18.77
   1  12  -9  183.91   20.43
  -1 -11   1  154.04   15.93
   1  11  -1  180.69   16.03
  -1 -11   2   62.88   13.08
   1  11  -2   55.30   10.99
  -1 -11   3  142.40   16.24
   1  11  -3  149.12   15.05
  -1 -11   4  198.85   18.39
   1  11  -4  218.74   17.72
  -1 -11   5  117.81   16.73
   1  11  -5  133.03   14.98
  -1 -11   6  140.37   16.45
   1  11  -6  154.53   16.80
  -1 -11   7  335.56   22.55
   1  11  -7  364.73   21.90
  -1 -11   8  251.03   19.97
   1  11  -8  268.57   20.43
  -1 -11   9  133.37   17.09
  -1 -11   9  134.23   17.73
  -1 -11  10   87.91   15.10
  -1 -11  10  112.05   16.50
  -1 -11  11  197.10   19.84
  -1 -11  11  191.79   18.55
  -1 -10   1  238.95   18.15
  -1 -10   2  157.46   15.93
   1  10  -2  168.36   14.71
  -1 -10   3  165.71   16.20
   1  10  -3  158.61   14.42
  -1 -10   4  321.03   20.70
   1  10  -4  338.62   18.73
  -1 -10   5  170.17   16.38
   1  10  -5  171.87   14.97
  -1 -10   6  297.98   19.43
   1  10  -6  356.75   20.10
  -1 -10   7  453.06   23.68
   1  10  -7  528.64   24.42
  -1 -10   8  213.72   17.11
  -1 -10   8  217.88   17.71
   1  10  -8  163.15   14.09
  -1 -10   9   69.32   12.63
  -1 -10   9   94.99   13.83
   1  10  -9   56.85   11.00
  -1 -10  10  192.64   18.79
  -1 -10  10  220.71   18.06
   1  10 -10  145.93   15.12
  -1 -10  11  229.03   20.04
  -1 -10  11  239.90   18.47
   1  10 -11  158.05   17.08
  -1 -10  12  246.84   22.02
  -1 -10  12  221.95   17.66
   1  10 -12  157.13   17.79
  -1  -9   1  808.65   28.80
   1   9  -1  886.87   26.64
  -1  -9   2  281.33   17.73
   1   9  -2  316.19   16.88
  -1  -9   3  187.58   15.74
   1   9  -3  208.61   14.44
  -1  -9   4  114.12   13.51
   1   9  -4  120.46    7.40
   1   9  -4  118.49   12.35
  -1  -9   5  220.37   16.71
   1   9  -5  225.11   11.38
   1   9  -5  242.96   15.80
  -1  -9   6  666.97   24.21
  -1  -9   6  669.74   26.59
   1   9  -6  550.24   19.45
  -1  -9   7  729.80   26.35
  -1  -9   7  715.75   27.50
   1   9  -7  539.70   21.19
  -1  -9   8  284.15   18.14
  -1  -9   8  251.65   17.33
   1   9  -8  207.22   15.21
  -1  -9   9  140.84   15.49
  -1  -9   9  132.49   14.21
   1   9  -9   97.70   12.98
  -1  -9  10  264.95   19.75
  -1  -9  10  259.23   17.89
   1   9 -10  223.00   17.90
  -1  -9  11  326.92   21.95
  -1  -9  11  333.61   19.49
   1   9 -11  249.42   19.51
  -1  -9  12  251.05   20.99
   1   9 -12  204.49   18.91
  -1  -9  13  122.14   17.31
   1   9 -13  108.52   16.54
  -1  -8   1  589.04   23.00
   1   8  -1  665.63   21.53
  -1  -8   2  566.37   22.83
   1   8  -2  653.42   21.44
  -1  -8   3  838.86   27.11
   1   8  -3  838.32   14.88
   1   8  -3  897.32   24.90
  -1  -8   4  647.98   24.37
   1   8  -4  636.66   16.45
   1   8  -4  761.43   23.30
  -1  -8   5  232.64   13.87
   1   8  -5  176.21   10.73
  -1  -8   5  257.72   16.34
  -1  -8   6  397.92   18.18
  -1  -8   6  395.11   19.57
   1   8  -6  308.01   15.06
  -1  -8   7  322.25   17.47
  -1  -8   7  315.05   17.93
   1   8  -7  280.97   15.67
  -1  -8   8  379.91   19.61
  -1  -8   8  386.33   19.41
   1   8  -8  350.08   18.51
  -1  -8   9  425.55   21.52
  -1  -8   9  461.99   20.89
   1   8  -9  418.75   21.05
  -1  -8  10  232.39   17.63
  -1  -8  10  227.17   15.39
   1   8 -10  194.78   16.67
  -1  -8  11  228.38   18.74
  -1  -8  11  250.80   16.06
   1   8 -11  260.52   19.48
  -1  -8  12  146.88   16.54
   1   8 -12  158.11   17.52
  -1  -8  13  151.96   17.69
   1   8 -13  199.55   19.96
  -1  -8  14  167.21   19.06
   1   8 -14  191.40   21.06
  -1  -7   1  413.09   18.08
   1   7  -1  428.24   16.19
  -1  -7   2  363.69   16.85
   1   7  -2  345.84    6.51
   1   7  -2  388.08    7.62
   1   7  -2  420.16   16.08
  -1  -7   3  600.79   21.60
   1   7  -3  560.58   13.33
   1   7  -3  655.94   19.87
  -1  -7   4  548.17   18.43
  -1  -7   4  567.65   21.19
   1   7  -4  468.88   14.39
  -1  -7   5 1360.56   30.16
  -1  -7   5 1269.62   31.51
   1   7  -5 1302.24   27.10
  -1  -7   6  643.56   21.60
  -1  -7   6  603.56   21.83
   1   7  -6  722.73   21.53
  -1  -7   7  471.70   19.67
  -1  -7   7  433.61   18.65
   1   7  -7  502.52   19.42
  -1  -7   8  229.02   15.31
  -1  -7   8  214.84   13.79
   1   7  -8  273.56   15.86
  -1  -7   9  167.58   14.31
  -1  -7   9  155.17   12.23
   1   7  -9  185.10   14.67
  -1  -7  10  123.45   13.51
  -1  -7  10  131.75   11.41
   1   7 -10  134.23   14.05
  -1  -7  11   61.42   11.24
  -1  -7  11   92.61   10.12
   1   7 -11   87.38   13.50
  -1  -7  12  183.26   17.06
   1   7 -12  223.07   19.50
  -1  -7  13  226.61   18.78
   1   7 -13  293.86   22.21
  -1  -7  14  244.83   20.65
   1   7 -14  267.98   22.53
  -1  -7  15  218.46   20.86
   1   7 -15  221.97   22.27
  -1  -6   1 1454.29   30.12
   1   6  -1 1582.51   28.34
   1   6  -2  972.10   15.04
   1   6  -2 1121.94   23.78
  -1  -6   2 1002.36   25.10
  -1  -6   3  360.77   13.84
  -1  -6   3  364.67   15.73
   1   6  -3  346.36   10.57
   1   6  -4  301.69   11.28
  -1  -6   4  253.15   12.18
  -1  -6   4  250.67   13.30
  -1  -6   5  535.19   17.93
  -1  -6   5  503.98   18.29
   1   6  -5  577.14   16.82
  -1  -6   6  679.80   21.09
  -1  -6   6  637.53   20.50
   1   6  -6  716.69   20.38
  -1  -6   7  573.46   20.41
  -1  -6   7  543.29   19.09
   1   6  -7  572.36   19.85
  -1  -6   8  383.41   17.85
  -1  -6   8  411.49   16.57
   1   6  -8  412.22   18.17
  -1  -6   9  249.20   15.68
  -1  -6   9  253.20   13.22
   1   6  -9  264.96   16.29
  -1  -6  10  187.63   14.59
  -1  -6  10  205.39   11.82
   1   6 -10  194.07   15.80
  -1  -6  11  138.93   13.89
   1   6 -11  150.06   15.92
  -1  -6  11  133.34    9.64
   1   6 -12  327.55   21.39
  -1  -6  12  317.28   19.66
  -1  -6  13  226.26   18.50
   1   6 -13  286.35   22.03
  -1  -6  14  212.47   18.59
   1   6 -14  207.94   20.22
  -1  -6  15  282.28   21.38
   1   6 -15  326.82   25.01
  -1  -5   1 1396.21   27.30
   1   5  -1 1448.26   25.08
  -1  -5   2 1149.98   24.89
   1   5  -2 1287.73   18.44
   1   5  -2 1233.55   23.56
  -1  -5   3   60.93    6.77
  -1  -5   3   58.85    7.55
   1   5  -3   59.60    5.35
  -1  -5   4  885.86   20.77
  -1  -5   4  815.34   20.99
   1   5  -4  899.70   18.59
  -1  -5   5  148.54    9.49
  -1  -5   5  153.83    9.77
   1   5  -5  143.95    9.01
  -1  -5   6 1104.93   25.50
  -1  -5   6 1011.42   23.44
   1   5  -6 1064.87   23.95
   1   5  -7  590.69   19.39
  -1  -5   7  560.34   17.28
  -1  -5   7  598.32   19.84
  -1  -5   8  463.47   18.58
  -1  -5   8  463.67   15.52
   1   5  -8  463.73   18.84
  -1  -5   9  645.97   22.78
  -1  -5   9  675.18   18.42
   1   5  -9  664.18   23.45
  -1  -5  10  173.85   13.69
  -1  -5  10  201.91   10.36
   1   5 -10  201.86   15.43
  -1  -5  11  371.78   19.44
  -1  -5  11  339.55   12.94
   1   5 -11  466.89   22.68
  -1  -5  12  404.89   21.18
   1   5 -12  456.86   23.66
  -1  -5  13  303.59   19.68
   1   5 -13  390.43   23.64
  -1  -5  14  195.35   17.69
   1   5 -14  230.89   20.75
  -1  -5  15  241.38   20.20
   1   5 -15  270.89   23.03
  -1  -4   1 2092.92   30.98
   1   4  -1 2341.65   24.55
   1   4  -1 2131.54   21.54
   1   4  -1 2173.41   30.03
  -1  -4   2  289.69   10.68
  -1  -4   2  298.23   11.97
   1   4  -2  293.46    7.82
  -1  -4   3 1715.13   27.09
  -1  -4   3 1737.10   28.01
   1   4  -3 1742.20   24.46
  -1  -4   4   41.87    6.05
   1   4  -4   33.12    4.93
  -1  -4   5  544.04   16.06
  -1  -4   5  526.82   15.05
   1   4  -5  542.55   15.67
  -1  -4   6  675.15   19.04
  -1  -4   6  641.12   16.42
   1   4  -6  657.11   18.51
  -1  -4   7  982.72   24.30
  -1  -4   7  945.55   19.71
   1   4  -7  966.49   24.02
  -1  -4   8 1268.04   29.18
  -1  -4   8 1264.34   22.50
   1   4  -8 1221.00   28.90
  -1  -4   9  889.52   25.76
  -1  -4   9  895.68   18.06
   1   4  -9  937.54   26.99
  -1  -4  10  385.18   18.45
  -1  -4  10  406.03   11.79
   1   4 -10  441.59   20.31
  -1  -4  11  287.99   17.11
   1   4 -11  318.17   18.91
   1   4 -12  462.60   23.42
  -1  -4  12  428.96   21.40
  -1  -4  13  343.40   20.53
   1   4 -13  396.54   23.37
  -1  -4  14  213.23   17.93
   1   4 -14  231.12   20.11
  -1  -4  15  204.81   18.76
   1   4 -15  203.79   20.50
   1   4 -16  106.71   18.19
  -1  -4  16  103.00   16.51
  -1  -3   1  929.15   17.94
   1   3  -1 1048.87   12.44
   1   3  -1 1050.31   12.47
   1   3  -1 1113.72   18.76
  -1  -3   2  768.29   15.45
  -1  -3   2  765.18   16.14
   1   3  -2  798.46   12.96
  -1  -3   3 2191.57   30.41
  -1  -3   3 2257.20   28.97
   1   3  -3 2265.25   27.76
  -1  -3   4  675.47   16.16
   1   3  -4  666.91   15.57
  -1  -3   4  669.68   14.86
  -1  -3   5 2064.16   31.50
  -1  -3   5 1997.04   26.49
   1   3  -5 2037.80   30.78
  -1  -3   6 1188.58   19.34
  -1  -3   6 1226.73   25.09
   1   3  -6 1206.10   25.01
  -1  -3   7  225.64   11.99
  -1  -3   7  239.52    8.53
   1   3  -7  230.41   12.43
  -1  -3   8  566.43   19.19
  -1  -3   8  545.62   12.04
   1   3  -8  594.41   20.11
  -1  -3   9  574.36   20.63
  -1  -3   9  569.08   11.83
   1   3  -9  546.75   20.61
  -1  -3  10  825.11   25.91
  -1  -3  10  843.06   14.26
   1   3 -10  819.08   26.41
  -1  -3  11  323.79   17.98
   1   3 -11  309.96   18.33
  -1  -3  12  531.02   23.64
   1   3 -12  525.93   24.19
  -1  -3  13  346.76   20.73
   1   3 -13  353.37   21.71
   1   3 -14  399.83   24.16
  -1  -3  14  377.89   22.67
   1   3 -15  143.05   18.99
  -1  -3  15  112.69   16.07
  -1  -3  16  117.30   17.87
   1   3 -16  109.78   17.68
  -1  -2   1  107.76    3.71
  -1  -2   1  105.30    5.15
  -1  -2   1  100.47    5.68
   1   2  -1  104.55    3.54
  -1  -2   2 4828.06   61.57
  -1  -2   2 4961.70   48.94
   1   2  -2 5190.55   56.65
  -1  -2   3   40.53    4.03
   1   2  -3   41.45    4.16
  -1  -2   4 1657.36   25.39
  -1  -2   4 1703.00   21.82
   1   2  -4 1811.64   25.94
  -1  -2   5 1988.76   30.13
  -1  -2   5 1867.60   22.57
   1   2  -5 1952.17   29.58
  -1  -2   6 1499.80   27.45
  -1  -2   6 1408.58   18.48
   1   2  -6 1464.08   27.29
  -1  -2   7  632.22   18.89
  -1  -2   7  625.26   11.10
   1   2  -7  631.03   19.23
  -1  -2   8  178.34   11.48
  -1  -2   8  183.85    5.52
   1   2  -8  178.73   11.59
   1   2  -9 1011.04   27.24
  -1  -2   9 1062.33   27.56
   1   2 -10  412.07   19.13
  -1  -2  10  407.21   18.71
  -1  -2  11  312.47   17.80
   1   2 -11  317.41   18.33
   1   2 -12  218.46   16.76
  -1  -2  12  259.97   17.56
  -1  -2  13  313.53   20.05
   1   2 -13  284.04   19.51
  -1  -2  14  227.60   18.58
   1   2 -14  216.32   18.69
  -1  -2  15  309.27   21.99
   1   2 -15  306.39   22.40
  -1  -2  16  206.93   20.23
   1   2 -16  196.66   20.34
  -1  -1   1  907.76   12.37
  -1  -1   1  864.04   12.89
  -1  -1   1  828.94   13.06
   1   1  -1  873.68   12.05
  -1  -1   2  143.96    5.28
  -1  -1   2  133.34    5.27
  -1  -1   2  138.33    5.23
  -1  -1   3 2030.24   26.26
  -1  -1   3 1940.57   21.58
   1   1  -3 2109.68   25.34
  -1  -1   4 1235.97   20.93
  -1  -1   4 1225.51   15.27
   1   1  -4 1197.34   19.94
   1   1  -5 1467.50   24.74
  -1  -1   5 1501.05   25.34
  -1  -1   5 1501.83   17.12
   1   1  -6  858.25   20.60
  -1  -1   6  827.41   19.97
  -1  -1   6  920.33   11.77
  -1  -1   7  496.94   16.73
   1   1  -7  509.47   17.33
  -1  -1   8  911.49   23.94
   1   1  -8  916.89   24.20
  -1  -1   9 1207.66   29.46
   1   1  -9 1189.63   29.12
   1   1 -10  252.14   15.51
  -1  -1  10  263.80   15.64
   1   1 -11  155.35   13.92
  -1  -1  11  145.28   13.47
   1   1 -12  268.75   17.66
  -1  -1  12  285.90   18.29
  -1  -1  13  422.11   23.10
   1   1 -13  390.75   21.82
  -1  -1  14  100.20   14.55
   1   1 -14  111.89   15.35
  -1  -1  15  212.73   19.09
   1   1 -15  208.79   19.26
  -1  -1  16  195.61   19.89
   1   1 -16  193.83   19.92
  -1   0   1 2178.84   23.28
  -1   0   1 2010.84   25.84
  -1   0   1 2026.12   22.28
   1   0  -1 2127.79   23.16
  -1   0   2  639.33   11.45
  -1   0   2  649.64   11.31
  -1   0   2  601.52    9.11
  -1   0   3 2124.80   20.97
  -1   0   3 2147.56   26.44
  -1   0   3 2160.55   26.68
  -1   0   4 1589.42   23.53
   1   0  -4 1752.16   24.74
   1   0  -4 1722.31   14.48
  -1   0   5 1669.50   26.22
   1   0  -5 1859.59   27.80
   1   0  -6 2191.27   32.98
  -1   0   6 2049.94   31.67
  -1   0   7  420.44   15.40
   1   0  -7  407.53   15.51
  -1   0   8  977.19   24.78
   1   0  -8 1012.12   25.22
  -1   0   9  460.30   18.60
   1   0  -9  457.19   18.51
  -1   0  10  262.75   15.61
   1   0 -10  234.74   15.08
  -1   0  11  226.06   15.86
   1   0 -11  234.84   16.02
  -1   0  12  645.95   26.13
   1   0 -12  593.25   24.58
  -1   0  13  314.00   20.02
   1   0 -13  275.90   18.73
  -1   0  14  306.97   21.01
   1   0 -14  275.07   20.27
  -1   0  15  195.27   18.85
   1   0 -15  156.64   17.38
  -1   0  16  283.08   22.72
   1   0 -16  259.93   21.92
  -1   1   0 3177.56   27.33
   1  -1   0 3525.28   40.79
  -1   1   1  133.51    5.02
  -1   1   1  122.99    3.77
   1  -1  -1  125.64    4.75
  -1   1   2 2141.41   25.00
  -1   1   2 1932.85   21.59
   1  -1  -2 2092.95   22.37
  -1   1   3 1691.75   22.19
   1  -1  -3 1823.25   19.70
  -1   1   3 1755.06   23.50
  -1   1   4  884.73   17.06
   1  -1  -4  937.84   12.27
  -1   1   4  942.81   17.49
  -1   1   5 2525.11   33.58
   1  -1  -5 2625.28   34.37
  -1   1   6 1980.29   31.46
   1  -1  -6 2119.05   32.43
  -1   1   7 1446.34   28.47
   1  -1  -7 1498.40   28.74
  -1   1   8  438.96   16.85
   1  -1  -8  432.54   16.82
   1  -1  -9  175.40   12.50
  -1   1   9  182.32   12.78
  -1   1  10  214.65   14.59
   1  -1 -10  217.50   14.56
  -1   1  11  730.29   26.26
   1  -1 -11  689.86   25.05
  -1   1  12  819.96   29.17
   1  -1 -12  796.97   28.39
  -1   1  13  355.91   21.20
   1  -1 -13  351.71   20.54
  -1   1  14  247.77   19.33
   1  -1 -14  203.55   17.48
  -1   1  15  214.92   19.32
   1  -1 -15  207.94   19.04
  -1   1  16  262.07   22.00
   1  -1 -16  230.99   20.97
  -1   2   0 8026.55   78.72
  -1   2   0 8790.79   90.36
   1  -2   0 8715.17   98.30
  -1   2   1 1011.54   15.04
  -1   2   1  993.57   14.17
   1  -2  -1  981.20   15.42
  -1   2   2  907.49   14.81
  -1   2   2  924.14   15.05
   1  -2  -2  915.04   15.04
  -1   2   3 1966.95   25.27
  -1   2   3 2030.97   27.16
   1  -2  -3 1964.16   25.48
  -1   2   4  953.28   17.75
  -1   2   4  971.53   18.94
   1  -2  -4  953.00   14.74
  -1   2   5  700.75   17.54
   1  -2  -5  749.32   17.31
   1  -2  -5  671.02   11.12
  -1   2   6  666.31   18.34
   1  -2  -6  679.54   17.90
   1  -2  -6  656.58    9.69
  -1   2   7  662.27   19.60
   1  -2  -7  679.92   19.34
   1  -2  -7  663.76    9.67
  -1   2   8  705.55   21.60
   1  -2  -8  707.03   21.21
  -1   2   9  572.70   20.92
   1  -2  -9  532.46   20.04
  -1   2  10  687.18   24.26
   1  -2 -10  709.94   24.19
  -1   2  11  702.80   25.99
   1  -2 -11  673.36   25.14
  -1   2  12  306.60   19.09
   1  -2 -12  295.14   18.38
  -1   2  13  280.76   19.33
   1  -2 -13  281.82   18.84
  -1   2  14  213.35   18.23
   1  -2 -14  204.92   17.61
  -1   2  15  276.26   21.19
   1  -2 -15  248.08   20.61
  -1   3   0 2776.14   26.35
  -1   3   0 3003.46   29.58
   1  -3   0 2969.31   35.59
  -1   3   1   25.86    3.22
  -1   3   1   26.22    3.17
   1  -3  -1   28.43    4.11
  -1   3   2  853.01   14.91
  -1   3   2  824.74   15.07
   1  -3  -2  826.02   16.38
  -1   3   3 1108.62   18.03
  -1   3   3 1073.39   19.28
   1  -3  -3 1071.96   18.68
  -1   3   4 1149.11   20.06
  -1   3   4 1223.46   22.48
  -1   3   4 1083.95   21.12
   1  -3  -4 1173.35   19.45
  -1   3   5  776.65   19.02
   1  -3  -5  762.78   17.66
   1  -3  -5  722.77   14.10
  -1   3   6  788.68   20.49
   1  -3  -6  777.03   19.21
   1  -3  -6  752.02   13.30
  -1   3   7  719.61   20.90
   1  -3  -7  710.57   19.98
   1  -3  -7  720.62   12.74
  -1   3   8  239.41   13.63
   1  -3  -8  240.60   13.34
   1  -3  -8  252.42    7.29
  -1   3   9  518.88   20.39
   1  -3  -9  518.03   19.69
   1  -3  -9  526.70    9.80
  -1   3  10  544.94   22.15
   1  -3 -10  527.80   21.18
  -1   3  11  526.63   22.94
   1  -3 -11  538.85   22.49
  -1   3  12  356.00   20.72
   1  -3 -12  370.48   20.04
  -1   3  13  197.79   17.66
   1  -3 -13  206.88   17.22
  -1   3  14  329.58   22.08
   1  -3 -14  291.11   20.03
  -1   3  15  160.13   17.95
   1  -3 -15  173.68   18.44
  -1   4   0  754.48   12.92
  -1   4   0  739.84   13.06
   1  -4   0  750.29   17.45
  -1   4   1  911.88   15.33
  -1   4   1  859.21   15.26
   1  -4  -1  881.88   19.07
  -1   4   2  832.74   15.34
  -1   4   2  786.56   15.83
   1  -4  -2  796.46   18.01
  -1   4   3 1010.42   17.74
  -1   4   3  943.81   19.05
   1  -4  -3  988.40   19.88
  -1   4   4  402.76   11.76
  -1   4   4  401.08   13.25
   1  -4  -4  378.66   11.89
  -1   4   5  634.77   17.81
  -1   4   5  571.77   16.89
   1  -4  -5  604.51   14.61
  -1   4   6 1133.61   25.59
   1  -4  -6 1136.61   23.86
   1  -4  -6 1074.76   19.33
  -1   4   7  688.84   21.16
   1  -4  -7  677.08   19.77
   1  -4  -7  681.91   14.64
  -1   4   8  329.39   16.16
   1  -4  -8  338.87   15.35
   1  -4  -8  341.77   10.36
  -1   4   9  266.89   15.83
   1  -4  -9  292.10   15.43
   1  -4  -9  284.43    9.20
  -1   4  10  343.62   18.50
   1  -4 -10  349.63   17.97
  -1   4  11  408.68   20.94
   1  -4 -11  420.82   20.28
  -1   4  12  348.56   20.66
   1  -4 -12  306.71   19.00
  -1   4  13  244.84   19.05
   1  -4 -13  244.27   18.36
  -1   4  14  314.45   22.01
   1  -4 -14  340.81   21.59
  -1   5   0  261.47    8.39
  -1   5   0  252.54    9.17
   1  -5   0  262.91   12.07
  -1   5   1 1095.32   17.74
  -1   5   1 1028.78   18.34
   1  -5  -1 1000.83   22.29
  -1   5   2  997.47   17.62
  -1   5   2  952.90   18.81
   1  -5  -2 1014.01   22.44
  -1   5   3  710.15   14.97
  -1   5   3  641.89   16.30
   1  -5  -3  674.36   17.91
  -1   5   4  562.15   14.22
  -1   5   4  546.98   16.17
   1  -5  -4  553.71   16.03
  -1   5   5  741.77   20.14
   1  -5  -5  737.40   18.32
  -1   5   6 1722.25   33.36
  -1   5   6 1611.10   32.07
   1  -5  -6 1788.79   31.76
   1  -5  -6 1686.62   28.71
  -1   5   7  412.79   17.45
   1  -5  -7  430.99   16.19
   1  -5  -7  417.96   13.35
  -1   5   8  418.09   18.56
   1  -5  -8  441.80   17.73
   1  -5  -8  442.59   13.55
  -1   5   9   77.97   11.07
   1  -5  -9   86.05   10.82
   1  -5  -9   78.02    6.85
  -1   5  10  305.92   18.27
   1  -5 -10  311.17   17.18
  -1   5  11  678.97   27.15
   1  -5 -11  707.59   26.16
  -1   5  12  372.05   21.81
   1  -5 -12  402.51   21.35
  -1   5  13  353.07   22.43
   1  -5 -13  356.54   21.36
  -1   5  14  181.45   18.42
   1  -5 -14  169.48   17.45
  -1   6   0 1333.90   20.10
  -1   6   0 1326.06   22.59
   1  -6   0 1313.31   27.95
  -1   6   1  283.38    8.97
  -1   6   1  274.05   10.62
   1  -6  -1  282.73   13.42
  -1   6   2  489.40   12.09
  -1   6   2  468.49   14.13
   1  -6  -2  507.48   17.28
  -1   6   3  395.85   11.40
  -1   6   3  369.43   13.47
   1  -6  -3  372.93   14.83
  -1   6   4  428.78   12.74
  -1   6   4  386.41   14.56
   1  -6  -4  399.28   15.25
  -1   6   5 1264.78   27.88
   1  -6  -5 1378.64   26.05
   1  -6  -5 1274.37   27.24
  -1   6   6  610.48   20.59
  -1   6   6  555.01   19.81
   1  -6  -6  618.09   18.17
   1  -6  -6  577.90   17.75
  -1   6   7 1511.48   34.28
   1  -6  -7 1577.02   32.00
   1  -6  -7 1464.55   28.68
  -1   6   8  796.44   26.22
   1  -6  -8  806.94   23.80
   1  -6  -8  802.08   20.51
  -1   6   9  370.79   19.45
   1  -6  -9  366.33   17.62
   1  -6  -9  380.88   14.12
  -1   6  10  166.31   15.10
   1  -6 -10  168.07   13.65
  -1   6  11  154.16   15.58
   1  -6 -11  161.58   14.36
  -1   6  12  223.42   18.67
   1  -6 -12  214.19   16.60
  -1   6  13  245.62   20.04
   1  -6 -13  263.62   19.10
  -1   7   0  747.31   15.15
  -1   7   0  771.89   18.83
   1  -7   0  696.63   21.74
  -1   7   1  881.23   16.53
  -1   7   1  863.76   20.10
   1  -7  -1  878.95   24.67
  -1   7   2  597.95   13.89
  -1   7   2  570.68   16.95
   1  -7  -2  586.37   20.23
  -1   7   3  470.82   12.92
  -1   7   3  441.10   15.65
   1  -7  -3  455.30   17.87
  -1   7   4  896.18   19.54
  -1   7   4  804.57   22.14
   1  -7  -4  883.86   24.71
  -1   7   5  864.83   24.26
   1  -7  -5  954.70   21.60
   1  -7  -5  897.34   24.85
  -1   7   6  405.12   18.15
   1  -7  -6  458.17   16.01
   1  -7  -6  404.65   16.69
  -1   7   7  588.82   22.67
  -1   7   7  542.73   21.58
   1  -7  -7  613.43   19.79
   1  -7  -7  572.89   19.40
  -1   7   8  415.29   20.63
   1  -7  -8  435.79   17.98
   1  -7  -8  434.22   16.92
  -1   7   9  348.26   19.76
   1  -7  -9  394.71   18.13
   1  -7  -9  360.41   15.36
  -1   7  10  365.84   21.48
   1  -7 -10  398.66   19.36
  -1   7  11  280.55   20.14
   1  -7 -11  287.80   17.73
  -1   7  12  179.82   17.84
   1  -7 -12  146.63   14.24
  -1   8   0  412.07   11.60
  -1   8   0  448.02   16.29
   1  -8   0  410.31   18.75
  -1   8   1  853.44   16.88
  -1   8   1  859.78   22.30
   1  -8  -1  875.73   26.72
  -1   8   2  778.00   16.69
  -1   8   2  778.17   21.55
   1  -8  -2  800.07   25.61
  -1   8   3  354.06   11.62
  -1   8   3  339.76   15.45
   1  -8  -3  372.22   17.98
  -1   8   4  862.96   24.53
   1  -8  -4  907.62   27.22
  -1   8   4  942.00   20.55
   1  -8  -5  270.52   15.40
   1  -8  -5  294.94   12.31
  -1   8   5  275.80   15.42
  -1   8   6  678.13   24.04
   1  -8  -6  705.50   23.67
   1  -8  -6  767.35   20.89
  -1   8   7  183.36   14.87
  -1   8   7  188.69   14.50
   1  -8  -7  189.39   11.78
   1  -8  -7  190.75   13.28
  -1   8   8  204.65   16.11
   1  -8  -8  178.20   11.99
   1  -8  -8  205.52   13.48
  -1   8   9  118.05   13.98
   1  -8  -9   85.09    9.94
   1  -8  -9  115.00   10.90
  -1   8  10  142.81   15.77
  -1   8  11  452.67   25.31
  -1   8  12  155.20   17.90
  -1   9   0  579.01   19.98
   1  -9   0  536.06   22.82
  -1   9   0  555.39   13.87
  -1   9   1  550.14   13.86
   1  -9  -1  496.63   21.77
  -1   9   1  546.65   19.69
  -1   9   2  338.64   16.25
   1  -9  -2  312.82   18.12
  -1   9   2  346.55   11.36
  -1   9   3  492.70   14.02
   1  -9  -3  436.00   20.48
  -1   9   3  456.84   19.12
   1  -9  -4  178.73    9.18
   1  -9  -4  216.51   15.66
  -1   9   4  212.44   14.28
  -1   9   5  457.34   20.30
   1  -9  -5  475.39   21.52
  -1   9   6  113.76   12.95
   1  -9  -6  110.55   12.09
  -1   9   7  162.13   14.99
  -1   9   7  157.46   14.47
   1  -9  -7  137.58   12.61
  -1   9   8  205.06   17.05
  -1   9   8  205.93   16.52
   1  -9  -8  209.28   14.91
  -1   9   9  201.84   17.96
   1  -9  -9  207.16   14.89
  -1   9  10  241.84   20.29
  -1  10   0  248.80   14.45
  -1  10   0  292.38   16.54
   1 -10   0  259.36   17.55
  -1  10   1  481.41   20.70
   1 -10  -1  427.40   21.78
   1 -10  -2  365.89   20.92
  -1  10   2  385.70   18.74
  -1  10   3  169.67   14.59
   1 -10  -3  190.48   16.37
  -1  10   4  154.18   13.99
   1 -10  -4  166.99   15.50
  -1  10   5  337.59   19.20
   1 -10  -5  355.13   20.50
  -1  10   6  129.34   14.99
   1 -10  -6  156.17   15.19
  -1  10   7  202.06   17.94
  -1  10   7  211.10   17.25
   1 -10  -7  211.02   16.45
  -1  10   8  315.55   21.65
  -1  10   8  292.76   20.32
   1 -10  -8  313.51   18.91
  -1  10   9  141.37   17.00
  -1  11   0   81.98   11.55
   1 -11   0   76.65   13.14
  -1  11   1  228.44   16.51
   1 -11  -1  233.12   18.79
  -1  11   2  438.78   21.58
   1 -11  -2  423.54   24.00
   1 -11  -3  132.37   15.73
  -1  11   3  120.71   13.84
  -1  11   4  458.10   22.72
   1 -11  -4  444.14   24.52
  -1  11   5  300.22   20.19
   1 -11  -5  289.54   20.86
  -1  11   6  174.93   17.71
   1 -11  -6  196.63   17.91
  -1  11   7  213.56   19.01
  -1  11   7  184.12   17.17
   1 -11  -7  224.08   17.99
  -1  11   8  223.15   19.91
  -1  11   8  216.08   18.73
   1 -11  -8  224.77   17.58
  -1  12   0  218.89   18.12
   1 -12   0  183.41   18.56
  -1  12   1  310.59   20.14
   1 -12  -1  279.73   21.82
  -1  12   2  120.72   15.04
   1 -12  -2  112.66   17.24
   1 -12  -3  174.27   18.74
  -1  12   3  166.90   16.67
  -1  12   4  333.58   21.98
   1 -12  -4  320.20   23.13
  -1  12   5  371.11   23.80
   1 -12  -5  417.29   25.44
  -1  12   6  174.64   18.48
   1 -12  -6  181.80   18.73
  -1  13   0  190.91   18.24
   1 -13   0  182.96   20.16
  -1  13   1   92.48   14.57
   1 -13  -1   69.70   15.13
  -1  13   2   73.24   13.63
   1 -13  -2   60.68   14.28
  -1  13   3  203.58   19.09
   1 -13  -3  205.52   21.41
   0 -13   1  163.28   19.63
   0  13  -1  177.42   17.79
   0 -13   2   74.25   14.79
   0  13  -2   69.39   13.10
   0 -13   3   53.67   13.35
   0  13  -3   54.49   11.93
   0 -13   4   99.89   16.79
   0  13  -4   87.56   13.85
   0 -13   5  132.70   18.53
   0  13  -5  141.11   17.16
   0 -13   6   73.27   15.27
   0  13  -6   78.00   14.09
   0 -13   7  184.16   20.00
   0  13  -7  213.05   20.35
   0 -12   1  362.24   24.05
   0  12  -1  351.32   21.56
   0 -12   2  255.66   20.75
   0  12  -2  308.57   20.05
   0 -12   3  150.05   16.45
   0  12  -3  171.03   16.36
   0 -12   4  148.63   17.09
   0  12  -4  160.64   16.10
   0 -12   5   96.43   15.98
   0  12  -5   95.56   13.69
   0 -12   6   72.84   14.16
   0  12  -6   78.30   12.95
   0 -12   7  257.39   20.97
   0  12  -7  314.36   21.27
   0 -12   8  313.12   22.45
   0  12  -8  339.03   22.69
   0 -12   9  155.09   17.46
   0  12  -9  182.60   19.46
   0 -12  10   81.63   14.53
   0 -12  10   76.11   14.31
   0 -11   1  453.54   24.71
   0  11  -1  445.09   21.60
   0 -11   2  296.32   20.51
   0  11  -2  314.57   18.78
   0 -11   3  170.46   16.72
   0  11  -3  175.22   15.21
   0 -11   4  318.19   21.20
   0  11  -4  363.60   19.66
   0 -11   5  161.63   16.54
   0  11  -5  163.46   15.59
   0 -11   6  248.19   19.05
   0  11  -6  250.91   17.83
   0 -11   7  315.79   21.08
   0  11  -7  365.34   21.26
   0 -11   8  330.78   21.65
   0  11  -8  359.14   20.99
   0  11  -8  355.98   22.62
   0 -11   9  108.55   14.99
   0 -11   9  130.14   17.15
   0  11  -9  120.71   15.22
   0 -11  10  164.35   17.81
   0 -11  10  164.62   16.61
   0  11 -10  191.74   18.40
   0 -11  11  147.39   17.54
   0 -11  11  173.28   17.45
   0  11 -11  139.13   18.49
   0 -10   1  481.46   23.53
   0  10  -1  540.95   21.87
   0 -10   2  291.05   18.41
   0  10  -2  332.49   17.85
   0 -10   3  427.21   22.26
   0  10  -3  456.73   20.25
   0 -10   4  300.63   19.21
   0  10  -4  321.57   11.54
   0  10  -4  373.83   18.64
   0 -10   5  319.70   19.70
   0  10  -5  327.15   13.14
   0  10  -5  374.98   19.00
   0 -10   6  213.08   16.19
   0  10  -6  245.90   13.51
   0  10  -6  218.35   16.02
   0 -10   7  289.71   17.49
   0 -10   7  278.41   18.60
   0  10  -7  349.70   17.86
   0 -10   8  245.38   17.51
   0 -10   8  225.34   17.28
   0  10  -8  254.82   17.51
   0 -10   9  292.88   19.79
   0 -10   9  279.26   19.15
   0  10  -9  241.13   18.66
   0 -10  10  225.82   18.87
   0 -10  10  228.77   17.87
   0  10 -10  193.94   18.00
   0 -10  11  140.81   17.99
   0 -10  11  121.17   14.44
   0  10 -11   71.35   14.08
   0 -10  12   91.79   15.58
   0  10 -12   34.63   11.88
   0 -10  12   68.40   11.51
   0  -9   1  377.51   19.65
   0   9  -1  354.19    8.94
   0   9  -1  387.12   17.68
   0   9  -2  465.30   10.87
   0   9  -2  455.40   18.89
   0  -9   3  450.15   21.20
   0   9  -3  417.44   11.22
   0   9  -3  494.98   19.23
   0  -9   4  327.63   18.46
   0   9  -4  347.40   12.17
   0   9  -4  369.16   17.18
   0  -9   5  553.40   23.33
   0   9  -5  624.82   19.04
   0   9  -5  562.05   21.24
   0  -9   6  560.17   21.57
   0  -9   6  484.11   21.65
   0   9  -6  652.74   21.88
   0  -9   7  469.95   20.74
   0  -9   7  459.81   21.54
   0   9  -7  465.89   20.38
   0  -9   8  105.60   12.66
   0  -9   8  117.67   13.17
   0   9  -8   83.24   12.10
   0  -9   9  129.32   13.85
   0  -9   9  123.32   13.01
   0   9  -9   95.86   13.50
   0  -9  10   44.83   10.43
   0  -9  10   68.47   11.33
   0   9 -10   48.80   11.30
   0  -9  11  130.91   15.27
   0  -9  11  133.45   13.49
   0   9 -11   69.08   13.51
   0  -9  12  141.51   16.21
   0  -9  12  132.81   12.74
   0   9 -12  112.97   17.20
   0  -9  13  136.94   17.71
   0   9 -13   81.45   15.62
   0  -8   1  566.88   21.68
   0   8  -1  583.05   10.81
   0   8  -1  601.07   19.37
   0  -8   2 1141.21   30.18
   0   8  -2 1133.98   16.60
   0   8  -2 1245.39   27.79
   0  -8   3  375.49   18.10
   0   8  -3  362.59   10.78
   0   8  -3  385.09   15.97
   0  -8   4  209.20   14.31
   0   8  -4  256.20   11.26
   0   8  -4  249.30   13.65
   0  -8   5   84.00    9.30
   0  -8   5   94.24   11.89
   0   8  -5   90.32    9.16
   0  -8   6  375.88   17.08
   0  -8   6  357.88   17.90
   0   8  -6  288.66   15.18
   0  -8   7  519.32   20.99
   0  -8   7  490.08   20.61
   0   8  -7  343.12   17.73
   0  -8   8  717.31   25.21
   0  -8   8  720.21   25.08
   0   8  -8  466.13   21.71
   0  -8   9  315.28   18.30
   0  -8   9  316.68   17.36
   0   8  -9  203.13   16.45
   0  -8  10  166.50   15.10
   0  -8  10  167.36   13.01
   0   8 -10  117.83   15.44
   0  -8  11   53.31   10.89
   0  -8  11   75.73   10.63
   0   8 -11   42.60   11.17
   0  -8  12  122.65   14.71
   0  -8  12  106.23   10.85
   0   8 -12   91.93   15.37
   0  -8  13  287.44   20.60
   0   8 -13  217.97   21.34
   0  -8  14  158.16   18.11
   0   8 -14  116.57   18.63
   0  -7   1 1281.62   29.58
   0   7  -1 1377.07   17.22
   0   7  -1 1424.47   27.44
   0  -7   2  718.74   22.33
   0   7  -2  665.74   12.61
   0   7  -2  802.56   20.43
   0  -7   3  502.63   18.90
   0   7  -3  581.33   14.53
   0   7  -3  580.66   17.77
   0  -7   4  385.61   14.83
   0  -7   4  374.06   16.58
   0   7  -4  392.95   14.09
   0  -7   5  261.85   13.04
   0  -7   5  244.41   13.51
   0   7  -5  189.99   11.54
   0  -7   6  224.63   13.26
   0  -7   6  223.36   13.46
   0   7  -6  155.93   11.51
   0  -7   7  257.55   14.52
   0  -7   7  267.70   14.76
   0   7  -7  194.55   13.47
   0  -7   8  483.39   20.07
   0  -7   8  486.93   19.30
   0   7  -8  388.23   19.58
   0  -7   9  670.33   24.36
   0  -7   9  681.93   22.71
   0   7  -9  568.38   24.32
   0  -7  10  604.79   24.21
   0  -7  10  605.22   21.48
   0   7 -10  473.34   23.66
   0  -7  11  279.77   15.15
   0  -7  11  266.17   17.76
   0   7 -11  215.17   18.34
   0   7 -12  163.82   18.14
   0  -7  12  172.15   15.77
   0  -7  13  342.07   21.08
   0   7 -13  293.38   22.83
   0  -7  14  121.45   16.54
   0   7 -14  114.40   18.21
   0  -7  15  255.40   20.66
   0   7 -15  210.73   22.49
   0   6  -1 1140.48   22.49
   0  -6   1 1102.74   25.30
   0   6  -1 1058.79   13.59
   0  -6   2  813.95   21.75
   0   6  -2  871.85   15.50
   0   6  -2  914.83   20.24
   0  -6   3  703.13   17.96
   0  -6   3  643.62   19.32
   0   6  -3  759.11   17.31
   0  -6   4  519.19   16.04
   0  -6   4  504.00   17.41
   0   6  -4  377.93   13.67
   0  -6   5  370.69   14.26
   0  -6   5  356.28   14.83
   0   6  -5  280.59   12.95
   0  -6   6  618.70   19.28
   0  -6   6  563.01   18.57
   0   6  -6  535.59   18.88
   0   6  -7  877.75   25.65
   0  -6   7  973.52   25.45
   0  -6   7  898.84   23.71
   0  -6   8  408.21   17.63
   0  -6   8  405.95   16.25
   0   6  -8  372.81   18.36
   0  -6   9  711.14   21.45
   0  -6   9  656.97   23.05
   0   6  -9  595.03   24.49
   0  -6  10  502.37   21.32
   0  -6  10  528.78   18.59
   0   6 -10  485.46   23.44
   0  -6  11  202.30   15.21
   0  -6  11  254.29   13.23
   0   6 -11  245.91   19.02
   0  -6  12  362.75   20.35
   0   6 -12  403.73   24.38
   0  -6  13  200.08   16.65
   0   6 -13  203.16   19.83
   0  -6  14  287.47   20.17
   0   6 -14  323.74   24.80
   0  -6  15  186.52   18.12
   0   6 -15  189.07   21.54
   0  -5   1  775.35   19.46
   0   5  -1  702.01   11.00
   0   5  -1  837.84   17.67
   0  -5   2  603.73   17.29
   0   5  -2  768.14   14.94
   0   5  -2  711.45   16.65
   0  -5   3 1470.44   25.09
   0  -5   3 1306.00   25.39
   0   5  -3 1031.37   20.57
   0  -5   4  610.63   16.35
   0  -5   4  580.73   17.04
   0   5  -4  484.97   14.95
   0  -5   5  717.74   18.71
   0  -5   5  679.27   18.50
   0   5  -5  715.36   19.43
   0  -5   6 1264.78   26.62
   0  -5   6 1204.94   25.13
   0   5  -6 1365.64   28.96
   0  -5   7  615.09   19.35
   0  -5   7  576.79   17.29
   0   5  -7  661.21   21.50
   0  -5   8  252.36   13.67
   0  -5   8  256.27   11.86
   0   5  -8  275.39   15.74
   0  -5   9  350.19   16.66
   0  -5   9  370.06   14.19
   0   5  -9  387.20   19.47
   0  -5  10  623.31   22.78
   0  -5  10  685.37   19.12
   0   5 -10  707.58   27.11
   0  -5  11  472.08   20.98
   0  -5  11  497.31   16.06
   0   5 -11  532.03   25.33
   0   5 -12  383.73   23.41
   0  -5  12  301.02   18.49
   0  -5  13  237.41   17.95
   0   5 -13  276.95   21.67
   0  -5  14  188.68   17.63
   0   5 -14  231.02   21.37
   0  -5  15  168.47   17.46
   0   5 -15  181.99   20.67
   0  -4   1 2140.61   24.23
   0  -4   1 1640.96   25.96
   0   4  -1 1822.96   20.73
   0   4  -1 1784.21   25.15
   0  -4   2  974.38   17.70
   0  -4   2  941.05   19.32
   0   4  -2  725.65   14.41
   0  -4   3 1029.52   19.33
   0  -4   3  955.86   19.52
   0   4  -3  941.02   18.41
   0  -4   4  448.44   13.20
   0  -4   4  435.43   13.41
   0   4  -4  485.43   14.24
   0  -4   5  835.51   19.29
   0  -4   5  824.15   18.56
   0   4  -5  920.40   21.12
   0  -4   6 1648.98   29.60
   0  -4   6 1582.54   26.83
   0   4  -6 1759.60   31.87
   0  -4   7  682.74   19.66
   0  -4   7  692.78   17.08
   0   4  -7  731.26   21.76
   0  -4   8  355.31   15.49
   0  -4   8  371.22   12.51
   0   4  -8  376.97   17.37
   0  -4   9  386.48   16.98
   0  -4   9  432.19   13.59
   0   4  -9  438.00   19.88
   0  -4  10  486.32   20.01
   0  -4  10  539.00   15.15
   0   4 -10  544.46   23.44
   0  -4  11  280.53   16.70
   0  -4  11  257.08   11.46
   0   4 -11  321.12   20.01
   0  -4  12  143.20   13.94
   0   4 -12  166.09   17.01
   0  -4  13  376.29   21.23
   0   4 -13  406.00   24.64
   0  -4  14  224.10   18.30
   0   4 -14  263.68   22.03
   0  -4  15  162.99   17.43
   0   4 -15  196.87   20.89
   0  -4  16  190.59   19.34
   0   4 -16  218.43   22.71
   0  -3   1   54.90    3.54
   0  -3   1   30.34    3.51
   0  -3   1   26.92    3.90
   0   3  -1   28.70    3.02
   0  -3   2 1572.36   21.96
   0  -3   2 1492.18   22.16
   0   3  -2 1508.84   21.04
   0  -3   3  332.55    9.68
   0  -3   3  337.10   10.19
   0   3  -3  361.51   10.25
   0  -3   4 1521.96   24.37
   0  -3   4 1449.83   22.36
   0   3  -4 1519.14   24.62
   0  -3   5 1048.46   21.10
   0  -3   5  986.16   18.17
   0   3  -5 1030.79   21.67
   0  -3   6  842.78   20.12
   0  -3   6  821.39   16.56
   0   3  -6  846.20   21.25
   0  -3   7  869.46   21.75
   0  -3   7  883.29   17.26
   0   3  -7  866.20   23.08
   0  -3   8  544.93   13.36
   0   3  -8  547.14   19.94
   0  -3   8  492.60   17.64
   0  -3   9 1292.85   30.06
   0  -3   9 1414.10   22.81
   0   3  -9 1343.91   32.61
   0  -3  10  639.03   22.68
   0   3 -10  681.15   25.32
   0  -3  10  697.33   15.00
   0  -3  11   64.81    9.97
   0   3 -11   78.57   12.57
   0  -3  12  101.03   12.38
   0   3 -12   74.18   12.32
   0   3 -13  315.65   21.82
   0  -3  13  281.28   18.99
   0  -3  14  246.99   19.03
   0   3 -14  292.43   22.28
   0  -3  15  199.46   18.68
   0   3 -15  214.16   21.10
   0  -3  16  152.41   18.22
   0   3 -16  160.09   19.98
   0  -2   1 4589.38   48.75
   0  -2   1 3729.95   36.51
   0  -2   1 3671.57   36.57
   0   2  -1 3372.98   31.72
   0  -2   2  467.68    9.81
   0  -2   2  465.05    9.85
   0   2  -2  508.52   10.14
   0  -2   3 2668.80   32.21
   0  -2   3 2523.43   28.49
   0   2  -3 2501.39   30.65
   0  -2   4  862.90   16.98
   0  -2   4  799.04   13.72
   0   2  -4  796.82   16.64
   0  -2   5 1162.92   21.79
   0  -2   5 1133.10   17.38
   0   2  -5 1087.84   21.69
   0  -2   6 1987.02   31.27
   0  -2   6 1967.02   25.40
   0   2  -6 1999.93   32.71
   0  -2   7 1200.49   25.38
   0  -2   7 1150.05   17.70
   0   2  -7 1143.93   25.96
   0  -2   8  642.37   19.87
   0  -2   8  685.30   13.01
   0   2  -8  636.34   20.85
   0  -2   9  682.26   12.81
   0   2  -9  640.01   22.40
   0  -2   9  626.79   21.12
   0  -2  10  330.84   16.94
   0  -2  10  359.32    8.70
   0   2 -10  326.37   17.99
   0   2 -11  214.10   16.48
   0  -2  11  202.20   15.28
   0  -2  12  425.03   21.44
   0   2 -12  474.47   23.67
   0  -2  13  517.90   24.69
   0   2 -13  558.61   26.81
   0  -2  14  221.34   18.37
   0   2 -14  238.89   20.40
   0   2 -15  247.27   21.54
   0  -2  15  253.87   20.78
   0   2 -16  190.63   20.78
   0  -2  16  174.71   19.12
   0  -1   1    0.48    0.28
   0  -1   1 3203.43   44.87
   0  -1   1 3280.98   42.79
   0   1  -1 3430.71   43.67
   0  -1   2   87.52    4.91
   0  -1   2  101.20    4.52
   0  -1   2   92.15    3.43
   0   1  -2   91.65    4.51
   0  -1   3 3182.06   32.90
   0  -1   3 3150.40   34.47
   0  -1   4 2400.80   26.82
   0   1  -4 2283.95   30.45
   0  -1   4 2287.91   29.19
   0  -1   5 1191.41   21.53
   0  -1   5 1200.25   16.18
   0   1  -5 1183.29   22.54
   0   1  -6 2099.32   33.17
   0  -1   6 2128.11   31.94
   0  -1   6 2141.34   25.51
   0  -1   7  692.62   19.22
   0  -1   7  729.93   11.81
   0   1  -7  705.51   20.22
   0  -1   8  932.15   23.88
   0  -1   8  999.17   14.22
   0   1  -8  976.81   25.18
   0  -1   9  288.04   14.87
   0  -1   9  300.02    6.67
   0   1  -9  290.46   15.73
   0  -1  10  307.38   16.48
   0   1 -10  331.14   17.69
   0  -1  11  353.70   18.73
   0   1 -11  377.06   19.98
   0  -1  12  889.67   30.28
   0   1 -12  929.40   31.37
   0  -1  13  426.84   22.68
   0   1 -13  443.36   23.83
   0  -1  14  304.08   20.72
   0   1 -14  327.21   22.22
   0  -1  15  139.01   16.74
   0   1 -15  175.59   19.03
   0  -1  16  231.73   21.38
   0   1 -16  258.39   22.83
   0   0   2  695.56    7.72
   0   0   2  636.25   10.73
   0   0  -2  671.21   11.21
   0   0   2  707.90    8.33
   0   0   2  642.90   10.42
   0   0   3   23.33    3.08
   0   0   3   33.71    1.95
   0   0  -4  444.23   12.13
   0   0   4  456.52   11.78
   0   0   4  498.10    6.81
   0   0  -5 1617.70   26.42
   0   0   5 1615.66   25.41
   0   0   5 1796.78   17.01
   0   0   6  657.65    9.68
   0   0  -6  616.63   17.68
   0   0   6  588.36   16.56
   0   0  -7 1183.43   25.75
   0   0   7 1216.49   25.57
   0   0   7 1364.66   16.38
   0   0  -8  464.70   17.62
   0   0   8  465.18   17.18
   0   0   8  514.84    8.65
   0   0   9  774.95   23.50
   0   0  -9  735.83   23.12
   0   0 -10  577.87   22.22
   0   0  10  565.71   21.56
   0   0 -11  680.29   25.38
   0   0  11  613.83   23.80
   0   0  12  446.40   21.81
   0   0 -12  425.78   22.34
   0   0  13  278.35   19.27
   0   0 -13  275.67   19.47
   0   0 -14  251.23   20.00
   0   0  14  237.98   18.86
   0   0 -15  271.12   21.73
   0   0  15  308.07   21.92
   0   0 -16  188.06   20.27
   0   0  16  172.65   18.77
   0  -1   0 2604.30   25.59
   0  -1   0 2543.49   32.74
   0   1   0 2437.96   23.16
   0   1   0 2796.69   33.91
   0  -1  -1 2753.87   27.76
   0  -1  -1 2624.59   30.82
   0  -1  -1 2520.54   30.09
   0   1   1 2594.22   27.77
   0  -1  -2 1331.10   15.99
   0  -1  -2 1293.27   14.51
   0   1   2 1347.12   16.23
   0   1   2 1338.01   18.15
   0   1   2 1216.07   17.72
   0  -1  -3 2384.14   26.91
   0  -1  -3 2446.55   24.72
   0   1   3 2470.50   29.88
   0  -1  -4  987.62   13.66
   0  -1  -4  980.18   17.93
   0   1   4  992.68   18.40
   0  -1  -5  383.63   12.80
   0  -1  -5  420.70    8.45
   0   1   5  397.23   12.85
   0  -1  -6  544.69   16.37
   0  -1  -6  586.48   10.42
   0   1   6  539.90   16.12
   0  -1  -7 1138.26   25.06
   0   1   7 1158.21   25.11
   0   1   7 1274.74   16.36
   0  -1  -8  436.92   16.88
   0   1   8  434.72   16.71
   0   1   8  479.19    8.39
   0   1   9  385.43   17.02
   0  -1  -9  367.65   16.76
   0   1   9  419.25    7.88
   0  -1 -10  325.34   17.23
   0   1  10  317.36   16.76
   0  -1 -11  709.69   25.64
   0   1  11  662.05   24.77
   0  -1 -12  419.88   21.63
   0   1  12  394.41   20.78
   0  -1 -13  360.37   21.47
   0   1  13  344.05   20.61
   0  -1 -14  217.34   18.81
   0   1  14  195.25   17.43
   0  -1 -15  232.88   20.40
   0   1  15  213.26   19.34
   0  -2   0  167.54    3.20
   0  -2   0  155.95    5.82
   0   2   0  145.28    2.80
   0   2   0  161.22    4.97
   0  -2  -1  591.14    7.95
   0  -2  -1  560.31   10.70
   0   2   1  582.15    8.10
   0   2   1  550.98   10.07
   0  -2  -2  719.17   10.84
   0  -2  -2  695.26   10.33
   0  -2  -2  678.90   11.69
   0   2   2  675.36   12.61
   0  -2  -3 1328.57   18.16
   0  -2  -3 1257.06   16.74
   0   2   3 1286.23   20.22
   0  -2  -4 1442.24   21.72
   0  -2  -4 1433.26   18.87
   0   2   4 1363.50   22.63
   0  -2  -5   82.80    7.57
   0  -2  -5   91.24    5.19
   0   2   5   90.03    7.52
   0  -2  -6 1604.68   27.67
   0  -2  -6 1617.61   22.13
   0   2   6 1603.52   28.53
   0  -2  -7 1129.00   24.65
   0  -2  -7 1159.75   18.20
   0   2   7 1084.37   24.77
   0  -2  -8 1008.30   24.92
   0  -2  -8 1046.30   17.13
   0   2   8  993.78   25.22
   0  -2  -9  217.56   13.41
   0  -2 -10  183.41   13.68
   0   2  10  174.31   13.53
   0  -2 -11  191.20   14.89
   0   2  11  199.83   14.94
   0  -2 -12  608.38   25.41
   0   2  12  572.97   24.69
   0  -2 -13  353.39   21.59
   0   2  13  351.34   21.05
   0  -2 -14  419.43   24.03
   0   2  14  420.53   24.00
   0  -2 -15  344.07   23.77
   0   2  15  316.18   22.41
   0  -3   0 1891.06   17.12
   0  -3   0 1718.65   24.12
   0   3   0 1765.33   15.89
   0   3   0 1709.36   20.88
   0  -3  -1  894.93   16.39
   0   3   1  906.17   15.06
   0  -3  -1  941.14   11.48
   0   3   1  971.63   11.48
   0  -3  -2 1214.21   15.67
   0  -3  -2 1104.01   18.36
   0   3   2 1177.13   18.75
   0  -3  -2 1179.68   15.39
   0  -3  -3 1610.10   22.57
   0   3   3 1627.47   24.50
   0  -3  -3 1690.23   20.87
   0  -3  -4  346.93   10.68
   0  -3  -4  327.09    9.84
   0   3   4  341.69   11.71
   0  -3  -5  753.85   17.03
   0  -3  -5  743.29   14.88
   0   3   5  768.59   18.82
   0   3   5  722.48   17.96
   0  -3  -6  849.54   19.73
   0  -3  -6  901.19   16.84
   0   3   6  902.40   21.82
   0  -3  -7 1158.85   24.90
   0  -3  -7 1207.23   20.24
   0   3   7 1161.36   26.43
   0  -3  -8  857.24   22.96
   0  -3  -8  839.60   16.54
   0   3   8  839.36   23.97
   0  -3  -9  567.94   20.21
   0  -3  -9  561.58   13.19
   0   3   9  533.24   20.58
   0  -3 -10  338.15   17.50
   0   3  10  329.37   17.67
   0  -3 -11  365.65   18.94
   0  -3 -12  425.21   21.78
   0   3  12  384.54   21.16
   0  -3 -13  277.57   19.25
   0   3  13  264.07   19.19
   0  -3 -14  297.86   21.62
   0   3  14  265.99   20.24
   0  -3 -15  302.59   22.42
   0   3  15  292.32   22.65
   0  -4   0 1501.48   16.31
   0  -4   0 1809.41   27.54
   0   4   0 1964.05   19.94
   0   4   0 1803.51   24.01
   0  -4  -1  894.54   10.36
   0  -4  -1  957.65   19.17
   0   4   1 1047.06   12.67
   0   4   1  983.80   17.38
   0  -4  -2  348.52    7.30
   0  -4  -2  342.55   11.54
   0   4   2  324.23   10.65
   0  -4  -3  381.41    9.49
   0  -4  -3  357.62   11.68
   0   4   3  328.43   11.50
   0  -4  -4  517.92   12.62
   0  -4  -4  492.88   13.58
   0   4   4  522.44   15.26
   0  -4  -5 1540.89   24.44
   0  -4  -5 1576.86   24.83
   0   4   5 1609.95   28.83
   0  -4  -6 1389.02   25.27
   0  -4  -6 1440.91   23.84
   0   4   6 1454.37   29.03
   0   4   6 1405.26   28.24
   0  -4  -7 1093.92   24.11
   0  -4  -7 1143.02   21.46
   0   4   7 1162.33   27.59
   0  -4  -8 1050.23   25.52
   0  -4  -8 1044.97   20.71
   0   4   8 1065.46   27.99
   0  -4  -9  747.94   23.18
   0  -4  -9  790.67   17.72
   0   4   9  753.45   25.09
   0  -4 -10  204.39   14.34
   0   4  10  184.36   14.96
   0  -4 -11  325.81   18.24
   0   4  11  336.36   19.47
   0  -4 -12  168.26   15.52
   0   4  12  162.68   15.96
   0  -4 -13  205.66   17.77
   0   4  13  181.59   17.26
   0  -4 -14  373.46   23.22
   0   4  14  356.19   23.33
   0  -5   0 1127.61   15.21
   0  -5   0 1439.95   26.66
   0   5   0 1499.00   16.97
   0   5   0 1461.55   23.38
   0  -5  -1 1313.88   13.81
   0   5   1 1585.68   18.05
   0   5   1 1470.85   23.70
   0  -5  -1 1459.40   26.86
   0   5   2 1956.00   28.84
   0  -5  -2 1980.06   32.07
   0  -5  -2 2033.38   25.02
   0  -5  -3  585.86   11.58
   0  -5  -3  570.66   16.37
   0   5   3  545.05   15.50
   0  -5  -4  565.25   13.01
   0  -5  -4  530.36   15.68
   0   5   4  571.37   16.80
   0  -5  -5  862.52   17.99
   0  -5  -5  867.91   20.21
   0   5   5  896.81   22.35
   0  -5  -6  832.24   19.45
   0  -5  -6  814.70   19.52
   0   5   6  860.46   23.35
   0   5   6  815.28   22.29
   0  -5  -7  802.78   19.61
   0  -5  -7  806.62   20.75
   0   5   7  815.78   24.19
   0  -5  -8  735.93   21.41
   0  -5  -8  745.01   18.97
   0   5   8  750.54   24.66
   0  -5  -9  344.74   16.26
   0  -5  -9  352.65   13.31
   0   5   9  351.09   18.45
   0  -5 -10  303.29   16.54
   0   5  10  278.67   17.80
   0  -5 -11  352.49   18.86
   0   5  11  351.16   20.72
   0  -5 -12  334.66   19.70
   0   5  12  312.65   20.77
   0  -5 -13   99.71   14.24
   0   5  13   90.30   14.35
   0  -5 -14  113.82   16.31
   0   5  14   78.15   14.23
   0  -6   0  733.09   12.10
   0  -6   0  639.15   19.26
   0   6   0  649.02   10.14
   0   6   0  643.58   16.71
   0  -6  -1  940.95   12.43
   0  -6  -1  938.02   23.23
   0   6   1  995.14   13.57
   0   6   1  964.79   20.53
   0  -6  -2 1370.30   17.32
   0  -6  -2 1243.54   19.57
   0  -6  -2 1279.99   27.37
   0   6   2 1243.05   24.09
   0  -6  -3 1164.06   16.50
   0  -6  -3 1119.08   25.61
   0   6   3 1136.20   23.88
   0  -6  -4  790.98   15.33
   0  -6  -4  743.17   20.67
   0   6   4  742.66   20.26
   0  -6  -5  616.83   15.15
   0  -6  -5  641.09   19.28
   0   6   5  632.04   19.90
   0  -6  -6  371.21   13.23
   0  -6  -6  386.96   15.21
   0   6   6  370.22   16.70
   0  -6  -7  315.89   13.41
   0  -6  -7  339.56   14.44
   0   6   7  315.47   16.58
   0   6   7  337.42   16.82
   0  -6  -8  289.15   13.98
   0  -6  -8  312.52   14.20
   0   6   8  299.10   17.28
   0  -6  -9  137.66   11.39
   0  -6  -9  134.44    9.97
   0   6   9  122.97   13.07
   0  -6 -10  159.22   13.10
   0   6  10  126.77   14.13
   0  -6 -11  350.09   18.88
   0  -6 -12  473.67   22.73
   0   6  12  458.03   25.21
   0  -6 -13  226.65   17.85
   0   6  13  269.78   21.35
   0  -7   0  866.81   14.51
   0  -7   0  677.90   21.62
   0   7   0  711.60   11.35
   0   7   0  720.84   19.41
   0  -7  -1  519.61    9.43
   0   7   1  699.24   10.84
   0   7   1  671.59   18.77
   0  -7  -2  708.59   10.89
   0  -7  -2  695.62   10.94
   0  -7  -2  652.42   21.19
   0   7   2  639.16   18.69
   0  -7  -3  340.82    8.67
   0  -7  -3  344.10   15.67
   0   7   3  333.53   14.33
   0  -7  -4  507.57   12.04
   0  -7  -4  511.81   18.94
   0   7   4  491.25   17.70
   0  -7  -5  288.03   10.49
   0  -7  -5  303.41   14.87
   0   7   5  314.25   15.47
   0  -7  -6  414.39   13.64
   0  -7  -6  461.33   18.03
   0   7   6  440.42   19.24
   0  -7  -7  135.90    9.39
   0  -7  -7  140.35   11.28
   0   7   7  135.87   12.85
   0   7   7  140.82   12.42
   0  -7  -8  206.70   11.70
   0  -7  -8  273.37   14.49
   0   7   8  274.32   17.63
   0  -7  -9  336.20   15.35
   0  -7  -9  441.34   17.71
   0   7   9  463.62   22.79
   0   7  10  197.59   16.98
   0   7  11  211.45   18.81
   0   7  12   79.04   13.93
   0  -8   0  336.03   16.86
   0   8   0  348.11    7.43
   0   8   0  329.88   14.93
   0  -8  -1  350.91   17.60
   0   8   1  343.07   15.19
   0  -8  -2  511.64   20.76
   0   8   2  493.46   18.31
   0  -8  -3  556.42   21.58
   0   8   3  547.50   19.40
   0  -8  -4  111.85   11.57
   0   8   4  113.35   10.81
   0  -8  -5  459.66   19.69
   0   8   5  457.51   19.29
   0  -8  -6  301.90   16.24
   0   8   6  310.87   17.39
   0  -8  -7  275.22   15.79
   0   8   7  256.10   16.98
   0  -8  -8  356.84   17.62
   0   8   8  379.09   20.88
   0   8   8  350.61   20.10
   0  -8  -9  350.61   17.42
   0   8   9  339.47   20.88
   0   8  10  261.17   20.15
   0   8  11  161.89   17.20
   0  -9   0  139.33   12.92
   0   9   0  165.95   12.54
   0  -9  -1  293.34   17.81
   0   9   1  271.38   15.19
   0  -9  -2  514.37   22.61
   0   9   2  500.00   19.94
   0  -9  -3  375.40   19.27
   0   9   3  381.66   17.88
   0  -9  -4  234.43   15.98
   0   9   4  252.08   15.48
   0  -9  -5  697.58   26.22
   0   9   5  625.80   23.68
   0  -9  -6  377.05   19.47
   0   9   6  342.02   19.18
   0  -9  -7  239.77   15.95
   0   9   7  232.21   17.36
   0  -9  -8  313.90   18.10
   0   9   8  299.05   19.99
   0   9   8  294.12   19.57
   0  -9  -9  238.36   16.02
   0   9   9  230.21   18.94
   0   9  10  262.98   21.01
   0 -10   0  457.75   23.11
   0  10   0  475.90   20.65
   0 -10  -1  286.47   19.21
   0  10   1  290.93   17.20
   0 -10  -2  381.52   20.99
   0  10   2  388.51   19.39
   0 -10  -3   13.32    7.31
   0  10   3   23.40    7.40
   0 -10  -4  393.43   21.68
   0  10   4  370.51   19.62
   0 -10  -5  556.09   25.20
   0  10   5  507.07   23.35
   0 -10  -6  540.23   25.06
   0  10   6  506.60   23.93
   0 -10  -7  219.04   16.72
   0  10   7  215.60   17.84
   0 -10  -8  132.66   14.37
   0  10   8  147.71   16.61
   0 -10  -9  287.08   18.85
   0  10   9  282.21   21.41
   0 -11   0  339.32   22.09
   0  11   0  317.29   19.42
   0 -11  -1  419.66   24.13
   0  11   1  390.29   21.16
   0 -11  -2  112.99   15.95
   0  11   2   81.18   12.09
   0 -11  -3  179.96   17.22
   0  11   3  178.49   16.36
   0 -11  -4  202.75   17.99
   0  11   4  200.66   16.68
   0 -11  -5  417.12   23.95
   0  11   5  339.87   21.46
   0 -11  -6  233.27   18.75
   0  11   6  220.58   18.45
   0 -11  -7  149.12   15.69
   0  11   7  153.26   17.61
   0 -12   0  206.19   18.83
   0  12   0  214.52   17.79
   0 -12  -1  132.06   18.62
   0  12   1  166.85   17.18
   0 -12  -2   91.75   16.19
   0  12   2   93.70   13.73
   0 -12  -3  248.86   21.09
   0  12   3  251.04   19.22
   0 -12  -4  185.56   19.00
   0  12   4  193.71   17.98
   0 -12  -5  230.71   20.51
   0  12   5  223.20   19.31
   0 -13   0  253.11   22.89
   0  13   0  287.46   21.73
   0 -13  -1   78.72   15.75
   0  13   1   90.53   14.79
   0 -13  -2  371.86   26.27
   0  13   2  313.45   22.52
   1 -13   1  282.51   23.14
  -1  13  -1  259.45   19.90
   1 -13   2  285.96   22.95
  -1  13  -2  336.83   21.75
  -1  13  -3  199.92   18.13
   1 -13   3  140.59   19.21
  -1  13  -4  189.80   18.30
   1 -13   4  163.82   18.90
  -1  13  -5  224.28   18.72
   1 -13   5  202.93   20.26
  -1  13  -6  146.69   16.64
   1 -13   6  129.44   19.16
  -1  13  -7  168.77   18.44
   1 -13   7  151.00   20.24
  -1  12  -1  199.63   16.87
   1 -12   1  213.23   19.35
  -1  12  -2  334.99   20.08
   1 -12   2  261.10   19.94
  -1  12  -3  224.93   17.79
   1 -12   3  187.34   18.28
  -1  12  -4  257.58   18.10
   1 -12   4  208.80   18.96
  -1  12  -5  205.44   17.38
   1 -12   5  165.39   17.49
  -1  12  -6  180.51   17.09
   1 -12   6  165.12   17.95
  -1  12  -7  321.72   21.20
   1 -12   7  287.39   21.76
  -1  12  -8  202.85   18.97
   1 -12   8  210.17   20.06
  -1  12  -9  157.93   19.02
  -1  12  -9  203.47   20.08
   1 -12   9  155.52   18.35
  -1  12 -10  115.17   15.58
   1 -12  10  113.15   17.04
  -1  11  -1  125.64   13.93
   1 -11   1  133.11   15.36
  -1  11  -2  285.35   17.54
   1 -11   2  256.26   19.21
  -1  11  -3  582.03   23.79
   1 -11   3  491.02   25.15
  -1  11  -4  312.12   14.31
  -1  11  -4  367.78   19.66
   1 -11   4  320.29   20.35
  -1  11  -5  175.48   11.25
  -1  11  -5  204.43   15.49
   1 -11   5  177.53   16.88
  -1  11  -6  178.68   12.51
  -1  11  -6  199.69   16.38
   1 -11   6  167.01   16.37
  -1  11  -7  191.07   14.29
  -1  11  -7  217.33   17.41
   1 -11   7  186.03   17.26
  -1  11  -8  232.23   16.66
  -1  11  -8  216.42   18.49
   1 -11   8  195.09   17.71
  -1  11  -9  174.13   16.48
   1 -11   9  155.57   15.98
   1 -11   9  166.63   17.44
  -1  11 -10  104.70   15.69
   1 -11  10  111.45   15.52
   1 -11  10  111.50   15.93
  -1  11 -11   77.91   14.94
   1 -11  11   86.35   14.47
   1 -11  11   89.12   14.56
  -1  10  -1  288.29   10.79
  -1  10  -1  310.71   17.09
   1 -10   1  278.54   18.59
  -1  10  -2  413.30   13.45
  -1  10  -2  435.97   19.14
   1 -10   2  397.24   21.26
  -1  10  -3  394.54   13.70
  -1  10  -3  445.91   19.52
   1 -10   3  387.77   20.71
  -1  10  -4  212.75   11.08
  -1  10  -4  246.85   15.52
   1 -10   4  221.68   16.90
  -1  10  -5  183.55   11.63
  -1  10  -5  188.76   13.98
   1 -10   5  167.06   15.27
  -1  10  -6  167.42   12.38
  -1  10  -6  167.92   14.07
   1 -10   6  121.26   13.96
  -1  10  -7  239.29   15.73
   1 -10   7  232.04   15.42
   1 -10   7  196.53   16.48
  -1  10  -8  332.66   19.58
   1 -10   8  281.28   17.68
   1 -10   8  299.06   19.42
  -1  10  -9  402.18   22.82
   1 -10   9  378.48   21.16
   1 -10   9  348.78   20.82
  -1  10 -10  217.28   19.11
   1 -10  10  217.75   17.90
   1 -10  10  238.33   18.32
  -1  10 -11  119.79   17.82
   1 -10  11   98.03   14.26
   1 -10  11  123.12   15.95
  -1  10 -12   53.46   13.94
   1 -10  12   45.74   11.69
   1 -10  12   42.63   10.35
  -1   9  -1  500.48   13.63
  -1   9  -1  544.18   19.43
   1  -9   1  488.76   21.81
  -1   9  -2  869.83   18.54
  -1   9  -2  965.16   25.89
   1  -9   2  881.40   28.45
  -1   9  -3  297.00   11.65
  -1   9  -3  367.65   16.57
   1  -9   3  293.75   17.13
  -1   9  -4  350.93   13.88
  -1   9  -4  361.87   16.57
   1  -9   4  344.29   18.82
  -1   9  -5  208.78   12.43
  -1   9  -5  200.63   13.29
   1  -9   5  170.94   14.39
  -1   9  -6  223.21   14.19
   1  -9   6  224.94   14.13
   1  -9   6  185.80   15.09
   1  -9   7  129.80   13.32
  -1   9  -7  175.80   14.63
   1  -9   7  153.84   12.61
   1  -9   8  296.60   18.22
  -1   9  -8  291.86   18.86
   1  -9   8  303.30   17.72
  -1   9  -9  306.35   20.01
   1  -9   9  321.19   18.63
   1  -9   9  308.72   18.60
  -1   9 -10  565.40   27.88
   1  -9  10  654.51   26.73
   1  -9  10  651.48   26.06
  -1   9 -11  296.51   22.15
   1  -9  11  370.66   21.76
   1  -9  11  387.20   20.50
  -1   9 -12   99.50   16.61
   1  -9  12  126.50   15.65
   1  -9  12  138.53   13.55
  -1   9 -13  132.75   20.30
   1  -9  13  133.28   15.86
  -1   8  -1  721.23   15.76
  -1   8  -1  746.58   20.58
   1  -8   1  698.48   23.87
  -1   8  -2  487.58   13.40
  -1   8  -2  549.09   17.77
   1  -8   2  493.41   19.92
  -1   8  -3  653.47   16.99
  -1   8  -3  765.58   21.04
   1  -8   3  674.81   23.56
  -1   8  -4  552.65   17.36
  -1   8  -4  575.97   18.91
   1  -8   4  516.90   20.96
  -1   8  -5  410.15   16.81
   1  -8   5  328.66   14.69
   1  -8   5  320.10   17.12
  -1   8  -6  407.13   18.41
   1  -8   6  332.97   15.72
   1  -8   6  313.32   17.08
  -1   8  -7  634.49   24.19
   1  -8   7  597.83   21.68
   1  -8   7  586.45   22.91
  -1   8  -8  348.83   20.04
   1  -8   8  413.66   18.91
   1  -8   8  409.05   19.54
  -1   8  -9  123.55   15.04
   1  -8   9  197.52   15.02
   1  -8   9  192.14   14.67
  -1   8 -10  170.94   16.81
   1  -8  10  283.75   17.94
   1  -8  10  272.70   16.65
  -1   8 -11  194.01   18.78
   1  -8  11  284.43   18.68
   1  -8  11  287.28   17.20
  -1   8 -12  202.30   20.27
   1  -8  12  247.52   18.08
   1  -8  12  235.01   15.46
  -1   8 -13  255.64   23.94
   1  -8  13  374.50   22.47
  -1   8 -14   75.96   16.94
   1  -8  14  118.07   16.20
  -1   7  -1  873.20   16.45
  -1   7  -1  959.97   21.31
   1  -7   1  912.75   25.04
  -1   7  -2  358.50   11.17
  -1   7  -2  431.21   14.48
   1  -7   2  383.40   16.66
  -1   7  -3  737.25   18.12
  -1   7  -3  767.16   19.39
   1  -7   3  694.16   21.81
  -1   7  -4  682.28   19.45
   1  -7   4  568.79   17.09
   1  -7   4  521.21   19.16
  -1   7  -5  646.57   20.85
   1  -7   5  518.69   17.15
   1  -7   5  510.24   19.44
  -1   7  -6  341.10   16.63
   1  -7   6  368.45   15.35
   1  -7   6  333.20   16.25
  -1   7  -7  618.94   23.44
   1  -7   7  960.99   25.92
   1  -7   7  873.65   26.05
  -1   7  -8  132.87   13.63
   1  -7   8  256.98   14.88
   1  -7   8  258.64   14.88
  -1   7  -9  162.61   15.38
   1  -7   9  290.15   16.48
   1  -7   9  294.27   15.87
  -1   7 -10  256.23   19.28
   1  -7  10  387.35   19.53
   1  -7  10  396.73   18.08
  -1   7 -11  148.47   16.76
   1  -7  11  220.91   15.75
   1  -7  11  244.05   15.16
  -1   7 -12  168.86   18.70
   1  -7  12  291.57   18.39
   1  -7  12  242.18   14.43
  -1   7 -13   63.08   14.47
   1  -7  13   97.65   13.76
  -1   7 -14  196.07   22.31
   1  -7  14  259.45   19.30
  -1   6  -1  730.68   14.41
  -1   6  -1  790.42   17.52
   1  -6   1  759.83   20.98
  -1   6  -2 1115.21   20.26
  -1   6  -2 1250.60   22.91
   1  -6   2 1100.77   25.32
  -1   6  -3  557.08   15.78
   1  -6   3  488.49   14.10
   1  -6   3  447.63   16.32
  -1   6  -4  724.41   20.14
   1  -6   4  585.38   16.19
   1  -6   4  556.15   18.27
  -1   6  -5  203.41   12.46
   1  -6   5  219.18   10.66
   1  -6   5  196.22   11.71
  -1   6  -6  636.16   21.64
   1  -6   6  947.44   23.48
   1  -6   6  842.11   23.29
  -1   6  -7  344.00   17.37
   1  -6   7  585.83   19.29
   1  -6   7  551.81   19.10
  -1   6  -8  198.12   14.91
   1  -6   8  352.62   15.96
   1  -6   8  338.31   15.57
  -1   6  -9  163.43   15.14
   1  -6   9  274.96   15.36
   1  -6   9  277.33   14.36
  -1   6 -10  315.35   20.79
   1  -6  10  495.66   20.75
   1  -6  10  551.10   19.77
  -1   6 -11  277.79   21.04
   1  -6  11  425.56   20.25
   1  -6  11  447.94   18.06
  -1   6 -12   57.47   13.21
   1  -6  12   70.33   11.07
   1  -6  12   77.25   14.48
  -1   6 -13   80.99   15.81
   1  -6  13  102.19   13.80
  -1   6 -14  128.67   19.46
   1  -6  14  201.11   17.14
  -1   6 -15  135.90   21.07
   1  -6  15  172.28   17.24
  -1   5  -1  237.46    8.12
  -1   5  -1  269.96    9.55
   1  -5   1  232.63   11.15
  -1   5  -2  282.51   10.02
  -1   5  -2  307.91   10.43
   1  -5   2  266.00   12.19
  -1   5  -3 1165.46   23.33
   1  -5   3  920.03   18.36
   1  -5   3  854.84   20.74
  -1   5  -4 1124.17   25.00
   1  -5   4 1201.15   23.10
   1  -5   4 1105.25   24.03
  -1   5  -5  391.48   15.81
   1  -5   5  585.03   16.15
   1  -5   5  532.71   16.85
  -1   5  -6  512.39   18.95
   1  -5   6  857.66   21.09
   1  -5   6  760.93   20.59
  -1   5  -7  425.17   18.74
   1  -5   7  681.90   19.76
   1  -5   7  619.84   18.85
  -1   5  -8  352.10   18.34
   1  -5   8  543.10   18.81
   1  -5   8  541.24   17.85
  -1   5  -9  457.51   22.07
   1  -5   9  612.28   20.94
   1  -5   9  680.52   20.21
  -1   5 -10  427.44   22.97
   1  -5  10  559.06   21.18
   1  -5  10  606.94   19.24
  -1   5 -11  298.80   21.05
   1  -5  11  381.45   18.77
   1  -5  11  405.46   15.96
  -1   5 -12   12.91    8.74
   1  -5  12   12.64    6.61
  -1   5 -13  190.23   20.22
   1  -5  13  223.55   17.31
  -1   5 -14  120.66   18.74
   1  -5  14  188.06   17.29
  -1   5 -15  198.05   22.57
   1  -5  15  235.69   19.65
  -1   4  -1 1746.22   23.33
  -1   4  -1 2032.16   26.00
   1  -4   1 1892.57   29.01
  -1   4  -2  803.98   16.55
   1  -4   2  709.54   13.73
   1  -4   2  692.65   16.94
  -1   4  -3 1058.09   22.03
   1  -4   3  924.19   17.46
   1  -4   3  885.65   19.38
  -1   4  -4  408.37   15.34
   1  -4   4  538.28   13.82
   1  -4   4  536.70   15.43
  -1   4  -5  837.99   22.15
   1  -4   5 1314.55   24.25
   1  -4   5 1216.10   24.11
  -1   4  -6  598.77   19.87
   1  -4   6  877.54   20.53
   1  -4   6  857.82   20.18
  -1   4  -7 1017.35   27.27
   1  -4   7 1445.98   28.49
   1  -4   7 1417.72   27.10
  -1   4  -8  534.28   21.50
   1  -4   8  667.58   20.14
   1  -4   8  678.96   18.53
   1  -4   9  283.16   14.53
   1  -4   9  295.38   12.63
  -1   4 -10  536.47   25.10
   1  -4  10  576.19   21.34
   1  -4  10  649.51   18.58
  -1   4 -11   92.12   14.76
   1  -4  11   89.47   11.71
   1  -4  11  112.68    8.70
  -1   4 -12  426.07   25.32
   1  -4  12  464.32   21.87
  -1   4 -13  328.86   24.03
   1  -4  13  346.03   20.64
  -1   4 -14  266.04   23.00
   1  -4  14  325.75   21.41
  -1   4 -15   98.60   17.38
   1  -4  15  144.55   16.75
  -1   3  -1 7226.83   78.07
  -1   3  -1 8490.32   96.86
   1  -3   1 7246.46   81.52
  -1   3  -2 3955.87   41.75
   1  -3   2 3060.41   35.55
   1  -3   2 2807.89   34.11
  -1   3  -3  702.76   17.41
   1  -3   3  805.68   15.10
   1  -3   3  813.90   16.92
  -1   3  -4  823.62   20.18
   1  -3   4 1239.19   21.08
   1  -3   4 1186.06   21.52
  -1   3  -5  555.08   18.21
   1  -3   5  749.38   17.23
   1  -3   5  709.57   16.73
  -1   3  -6  824.24   22.61
   1  -3   6 1007.08   21.63
   1  -3   6 1036.97   20.86
  -1   3  -7  794.27   23.67
   1  -3   7  897.01   21.59
   1  -3   7  919.78   19.85
  -1   3  -8  547.74   21.39
   1  -3   8  580.49   18.83
   1  -3   8  625.26   16.42
  -1   3  -9  458.58   21.13
   1  -3   9  473.51   18.31
   1  -3   9  503.10   14.97
  -1   3 -10  356.82   20.39
   1  -3  10  360.57   17.38
   1  -3  10  399.20   13.48
  -1   3 -11  219.72   18.17
   1  -3  11  238.01   15.98
   1  -3  11  239.76   10.63
  -1   3 -12  524.26   27.34
   1  -3  12  536.07   23.85
  -1   3 -13  484.80   27.59
   1  -3  13  519.85   24.63
  -1   3 -14  328.68   24.58
   1  -3  14  339.66   21.61
  -1   3 -15  174.91   21.07
   1  -3  15  196.94   18.72
  -1   2  -111991.81  128.06
   1  -2   111950.25  118.85
   1  -2   112223.30  142.04
  -1   2  -2 1979.30   26.98
   1  -2   2 1664.23   21.65
   1  -2   2 1694.16   23.42
   1  -2   3   63.49    4.35
   1  -2   3   58.71    4.82
  -1   2  -4  331.03   12.48
   1  -2   4  431.97   11.39
   1  -2   4  449.49   11.78
   1  -2   5  380.88   12.03
   1  -2   5  420.92   11.96
  -1   2  -6  904.22   23.18
   1  -2   6  936.51   20.29
   1  -2   6 1084.26   19.90
  -1   2  -7 1052.67   26.68
   1  -2   7 1046.69   23.19
   1  -2   7 1140.91   20.93
  -1   2  -8  627.64   22.08
   1  -2   8  638.33   19.67
   1  -2   8  665.53   15.87
  -1   2  -9  741.14   25.94
   1  -2   9  703.39   22.22
   1  -2   9  771.38   17.46
  -1   2 -10  239.53   17.31
   1  -2  10  247.66   15.08
   1  -2  10  284.48   10.81
  -1   2 -11  616.07   27.12
   1  -2  11  585.48   23.42
   1  -2  11  530.24   21.11
  -1   2 -12  335.18   22.25
   1  -2  12  345.85   19.66
  -1   2 -13  298.78   22.27
   1  -2  13  303.64   19.68
  -1   2 -14  195.05   20.16
   1  -2  14  246.53   19.60
  -1   2 -15  196.78   21.57
   1  -2  15  195.49   19.17
  -1   1  -1 1071.08   14.70
   1  -1   1 1078.25   11.75
   1  -1   2 1597.09   17.62
   1  -1   2 1679.64   20.51
  -1   1  -3 2836.17   35.47
   1  -1   3 3485.10   34.10
   1  -1   3 3847.24   36.75
  -1   1  -4 1789.35   28.32
   1  -1   4 1844.93   24.61
   1  -1   4 2026.47   24.27
   1  -1   5  294.99   10.84
   1  -1   5  330.06    9.80
  -1   1  -5  297.11   12.67
  -1   1  -6   25.09    6.39
   1  -1   6   19.58    4.63
   1  -1   6   26.94    4.22
  -1   1  -7  582.28   19.85
   1  -1   7  543.23   16.97
   1  -1   7  588.98   13.51
  -1   1  -8 1334.44   31.88
   1  -1   8 1387.95   22.13
   1  -1   8 1238.19   27.74
  -1   1  -9  688.69   24.83
   1  -1   9  680.42   15.42
   1  -1   9  605.50   20.88
  -1   1 -10  412.96   21.24
   1  -1  10  374.64   17.95
   1  -1  10  404.04   12.06
  -1   1 -11  221.74   17.75
   1  -1  11  214.14   15.50
  -1   1 -12  416.87   24.07
   1  -1  12  380.40   20.42
  -1   1 -13  394.87   24.40
   1  -1  13  393.12   21.94
  -1   1 -14  262.51   21.88
   1  -1  14  233.99   18.69
  -1   1 -15  255.32   23.44
   1  -1  15  269.60   20.87
  -1   0   0  589.53    8.84
  -1   0   0  600.38   10.35
   1   0   0  656.38    7.40
  -1   0  -1  485.25    8.91
  -1   0  -1  438.71    9.29
   1   0   1  463.87    9.01
   1   0   1  442.87    7.20
  -1   0  -2   40.89    4.67
  -1   0  -2   49.48    3.97
   1   0   2   55.93    3.58
  -1   0  -3  635.61   14.65
  -1   0  -3  738.56   13.63
  -1   0  -3  768.44   12.08
   1   0   3  767.25   13.96
  -1   0  -4 2730.65   35.99
   1   0   4 2685.72   33.23
   1   0   4 3001.60   35.49
  -1   0  -5 1587.19   28.31
   1   0   5 1483.46   24.79
   1   0   5 1656.97   23.82
  -1   0  -6  722.01   20.24
   1   0   6  677.98   17.68
   1   0   6  769.39   15.11
  -1   0  -7  766.14   22.37
   1   0   7  734.79   19.93
   1   0   7  826.84   15.71
  -1   0  -8  855.68   25.41
   1   0   8  748.17   21.53
   1   0   8  832.60   15.85
  -1   0  -9  519.13   21.79
   1   0   9  492.28   19.13
   1   0   9  522.51   12.90
  -1   0 -10  340.79   19.40
   1   0  10  292.01   16.21
   1   0  10  330.78   10.59
  -1   0 -11  244.13   18.88
   1   0  11  209.39   15.03
  -1   0 -12  345.68   21.76
   1   0  12  302.63   18.54
  -1   0 -13  507.46   26.92
   1   0  13  444.91   23.04
  -1   0 -14  357.49   24.31
   1   0  14  312.59   21.32
  -1   0 -15  387.47   27.90
   1   0  15  402.21   24.45
  -1  -1   0  803.41   10.71
  -1  -1   0  751.93   12.82
   1   1   0  705.79    8.45
   1   1   0  815.83   10.88
  -1  -1  -1 4832.13   42.45
  -1  -1  -1 4609.97   46.00
   1   1   1 3619.22   32.46
   1   1   1 4555.39   47.76
  -1  -1  -2 1670.54   21.99
  -1  -1  -2 2192.02   27.69
   1   1   2 2173.79   26.28
  -1  -1  -3  325.43   10.01
  -1  -1  -3  344.39    9.54
   1   1   3  340.12    9.43
   1   1   3  332.50    8.58
  -1  -1  -4  335.41   11.54
  -1  -1  -4  319.36    9.75
   1   1   4  305.02   10.31
  -1  -1  -5  115.44    9.36
  -1  -1  -5  107.96    6.54
   1   1   5  107.65    7.63
  -1  -1  -6 1444.27   28.83
  -1  -1  -6 1411.57   23.28
   1   1   6 1316.27   25.39
  -1  -1  -7 1501.94   31.51
  -1  -1  -7 1481.78   24.24
   1   1   7 1397.76   27.99
  -1  -1  -8 1376.30   32.04
   1   1   8 1202.99   27.73
   1   1   8 1377.58   23.00
  -1  -1  -9 1004.26   29.23
   1   1   9  928.32   25.90
   1   1   9  946.04   18.04
  -1  -1 -10  652.82   25.87
   1   1  10  609.59   22.50
   1   1  10  633.78   14.49
  -1  -1 -11  303.49   20.16
   1   1  11  269.40   16.72
  -1  -1 -12  448.31   23.99
   1   1  12  399.57   20.90
  -1  -1 -13  184.12   18.88
   1   1  13  148.76   15.64
  -1  -1 -14  227.05   20.88
   1   1  14  196.83   17.52
  -1  -1 -15  302.74   25.04
   1   1  15  319.00   22.38
  -1  -2   0 3036.14   29.41
  -1  -2   0 2982.13   34.32
   1   2   0 2545.54   23.34
   1   2   0 2974.29   28.98
  -1  -2  -1  976.34   10.97
  -1  -2  -1 1041.65   17.75
   1   2   1 1271.49   15.05
   1   2   1 1074.81   16.47
  -1  -2  -2  886.79   14.21
  -1  -2  -2 1145.91   19.12
   1   2   2 1175.09   16.70
   1   2   2 1159.85   18.18
  -1  -2  -3 1849.20   25.09
  -1  -2  -3 1776.28   25.46
   1   2   3 1848.35   25.97
  -1  -2  -4  406.48   12.33
  -1  -2  -4  384.96   11.47
   1   2   4  372.65   12.04
   1   2   4  368.43   10.98
  -1  -2  -5 1275.88   24.63
  -1  -2  -5 1181.81   21.23
   1   2   5 1196.41   23.16
  -1  -2  -6 1153.08   25.20
  -1  -2  -6 1117.26   21.02
   1   2   6 1141.73   24.19
  -1  -2  -7 1347.52   29.58
  -1  -2  -7 1353.00   24.01
   1   2   7 1277.96   27.35
  -1  -2  -8 1152.20   28.96
  -1  -2  -8 1065.48   21.22
   1   2   8  974.87   25.40
  -1  -2  -9 1002.36   29.03
  -1  -2  -9  970.58   20.26
   1   2   9  935.88   26.53
  -1  -2 -10  420.80   20.94
   1   2  10  381.83   18.55
   1   2  10  390.81   12.24
  -1  -2 -11  272.20   19.01
   1   2  11  202.43   15.23
  -1  -2 -12  397.85   22.54
   1   2  12  346.76   19.82
  -1  -2 -13  267.34   20.38
   1   2  13  217.11   17.81
  -1  -2 -14  173.92   19.08
   1   2  14  155.33   16.53
  -1  -2 -15  241.00   22.48
   1   2  15  197.67   19.13
  -1  -3   0 1150.31   20.51
   1   3   0 1195.93   18.30
  -1  -3  -1 1665.36   25.41
   1   3   1 1659.65   23.11
  -1  -3  -2 1863.46   20.87
  -1  -3  -2 2353.81   31.34
   1   3   2 2337.79   25.03
   1   3   2 2376.27   30.38
  -1  -3  -3 2147.38   26.83
  -1  -3  -3 2135.72   29.97
   1   3   3 2162.54   29.92
  -1  -3  -4  687.03   15.53
  -1  -3  -4  627.67   15.89
   1   3   4  643.34   16.62
  -1  -3  -5  924.53   20.20
  -1  -3  -5  876.25   19.07
   1   3   5  838.27   20.20
   1   3   5  840.89   19.19
  -1  -3  -6  675.38   18.83
   1   3   6  664.76   19.34
  -1  -3  -6  683.75   17.11
  -1  -3  -7  840.83   19.44
   1   3   7  883.33   23.74
  -1  -3  -7  868.36   23.17
  -1  -3  -8  812.86   24.46
  -1  -3  -8  772.62   18.81
   1   3   8  753.90   23.25
  -1  -3  -9  867.54   26.97
  -1  -3  -9  760.78   18.74
   1   3   9  749.84   24.69
  -1  -3 -10  150.75   14.47
  -1  -3 -10  119.50    8.30
   1   3  10  119.61   12.52
  -1  -3 -11  258.85   18.23
   1   3  11  214.51   16.07
  -1  -3 -12  307.59   20.68
   1   3  12  262.23   18.30
  -1  -3 -13  259.72   20.24
   1   3  13  248.26   19.33
  -1  -3 -14  263.68   22.64
   1   3  14  174.46   17.68
   1   4   0 1560.43   23.71
  -1  -4  -1  824.57   19.17
   1   4   1  854.82   17.64
  -1  -4  -2 2389.79   21.34
  -1  -4  -2 2202.25   19.29
  -1  -4  -2 1992.74   30.47
   1   4   2 2148.64   30.22
  -1  -4  -3  890.25   14.94
  -1  -4  -3  964.83   20.89
   1   4   3 1037.54   21.20
  -1  -4  -4 1947.97   27.06
  -1  -4  -4 1742.65   28.88
   1   4   4 1739.06   29.36
  -1  -4  -5  603.23   15.69
  -1  -4  -5  543.66   16.10
   1   4   5  549.44   17.46
  -1  -4  -6  646.70   18.10
  -1  -4  -6  599.56   17.23
   1   4   6  602.02   19.49
   1   4   6  541.92   17.27
  -1  -4  -7  132.21   10.72
  -1  -4  -7  138.60    9.33
   1   4   7  135.10   11.31
  -1  -4  -8  326.60   16.29
  -1  -4  -8  283.01   12.64
   1   4   8  295.67   16.17
  -1  -4  -9  298.75   16.73
  -1  -4  -9  268.90   12.33
   1   4   9  257.31   16.01
  -1  -4 -10  394.58   19.90
  -1  -4 -10  352.93   13.97
   1   4  10  367.67   19.78
  -1  -4 -11  258.37   17.83
   1   4  11  245.44   17.77
  -1  -4 -12  442.85   23.43
   1   4  12  362.60   21.80
  -1  -4 -13  314.30   22.20
   1   4  13  249.68   20.21
  -1  -4 -14  158.15   19.32
   1   4  14  161.75   17.79
  -1  -5   0 1355.73   26.88
   1   5   0 1451.01   24.93
  -1  -5  -1  941.72   22.29
   1   5   1  960.57   20.30
  -1  -5  -2  456.81   15.47
   1   5   2  493.93   15.15
  -1  -5  -3  739.11   19.84
  -1  -5  -3  540.39   10.14
  -1  -5  -3  766.17   11.13
   1   5   3  735.10   19.05
  -1  -5  -4  293.55    9.25
  -1  -5  -4  305.91   13.21
   1   5   4  292.86   13.09
  -1  -5  -5  573.10   14.79
  -1  -5  -5  547.18   17.53
   1   5   5  560.83   18.74
  -1  -5  -6  739.50   19.04
  -1  -5  -6  671.47   19.77
   1   5   6  724.10   22.53
  -1  -5  -7  418.36   16.05
  -1  -5  -7  386.30   15.56
   1   5   7  405.05   18.41
   1   5   7  392.63   16.87
  -1  -5  -8  254.23   14.22
  -1  -5  -8  243.11   12.79
   1   5   8  248.22   15.99
  -1  -5  -9  331.20   16.94
  -1  -5  -9  323.88   14.54
   1   5   9  329.08   19.02
  -1  -5 -10  396.18   19.51
  -1  -5 -10  371.23   15.36
   1   5  10  388.59   21.14
  -1  -5 -11  257.37   17.73
   1   5  11  250.83   18.73
  -1  -5 -12  149.72   15.11
   1   5  12  152.95   16.64
  -1  -5 -13  128.79   15.02
   1   5  13  161.71   18.65
  -1  -6   0  558.47   18.83
  -1  -6  -1  285.34   13.82
   1   6   1  295.35   12.73
  -1  -6  -2  453.91   17.04
   1   6   2  465.37   15.95
  -1  -6  -3  933.25   24.18
   1   6   3 1010.98   23.84
  -1  -6  -4  195.78    7.00
  -1  -6  -4  269.92   13.68
   1   6   4  281.87   13.80
  -1  -6  -5  283.71   10.20
  -1  -6  -5  306.66   14.84
   1   6   5  284.57   14.79
  -1  -6  -6  463.30   14.66
  -1  -6  -6  441.10   17.43
   1   6   6  495.01   19.98
  -1  -6  -7  584.19   18.01
  -1  -6  -7  617.30   20.57
   1   6   7  598.05   23.20
   1   6   7  599.70   21.87
  -1  -6  -8  305.27   14.30
  -1  -6  -8  341.09   16.05
   1   6   8  322.15   18.48
  -1  -6  -9  465.09   18.35
  -1  -6  -9  628.95   21.28
   1   6   9  642.24   26.42
  -1  -6 -10  193.79   14.55
  -1  -6 -10  246.36   14.10
   1   6  10  240.58   18.32
   1   6  12  252.22   21.29
  -1  -7   0  629.91   21.79
   1   7   0  671.15   20.02
  -1  -7  -1  296.45   15.35
   1   7   1  315.90   14.27
  -1  -7  -2  855.85   25.25
   1   7   2  892.67   23.59
  -1  -7  -3  558.20   20.57
   1   7   3  530.10   18.95
  -1  -7  -4  226.41   13.79
   1   7   4  246.85   13.97
  -1  -7  -5  368.11   17.19
   1   7   5  396.09   17.97
  -1  -7  -6  851.08   25.81
   1   7   6  875.70   27.26
  -1  -7  -7  414.94   18.39
   1   7   7  397.83   20.52
   1   7   7  399.67   19.13
  -1  -7  -8  342.28   17.27
   1   7   8  344.30   20.07
   1   7   8  351.07   19.29
  -1  -7  -9  288.45   16.16
   1   7   9  308.73   20.09
  -1  -7 -10  337.96   26.47
   1   7  10  326.45   21.98
   1   7  11  257.64   20.85
  -1  -8   0  448.11   20.27
   1   8   0  509.21   19.27
   1   8   1  524.02   19.52
  -1  -8  -2  522.44   21.58
   1   8   2  520.67   19.84
  -1  -8  -3  224.11   15.03
   1   8   3  224.71   14.37
  -1  -8  -4   85.89   11.53
   1   8   4   70.10    9.91
  -1  -8  -5  469.73   20.90
   1   8   5  468.64   20.55
  -1  -8  -6  813.86   26.93
   1   8   6  839.56   27.98
  -1  -8  -7  405.66   19.85
   1   8   7  395.48   21.15
  -1  -8  -8  240.01   16.05
   1   8   8  249.33   18.58
   1   8   8  229.59   16.97
  -1  -8  -9  218.96   15.48
   1   8   9  232.52   18.91
   1   8  10  290.73   21.78
  -1  -9   0  772.73   28.03
   1   9   0  789.79   25.34
  -1  -9  -1  438.54   21.54
   1   9   1  440.35   19.69
  -1  -9  -2  325.23   18.51
   1   9   2  312.08   17.32
  -1  -9  -3  111.75   12.07
   1   9   3  107.72   12.37
  -1  -9  -4  218.59   16.16
   1   9   4  213.36   15.37
  -1  -9  -5  335.33   19.20
   1   9   5  296.21   18.11
  -1  -9  -6  284.52   18.11
   1   9   6  295.66   18.91
  -1  -9  -7  265.21   17.78
   1   9   7  274.38   19.16
  -1  -9  -8  222.43   16.73
   1   9   8  220.44   18.52
   1   9   8  212.94   17.51
  -1  -9  -9  362.15   20.18
   1   9   9  346.34   22.97
  -1 -10   0  370.10   21.61
   1  10   0  339.25   18.81
  -1 -10  -1  279.91   19.30
  -1 -10  -2  156.65   15.60
   1  10   2  151.53   14.60
  -1 -10  -3  319.66   20.44
   1  10   3  320.96   19.20
  -1 -10  -4  381.26   21.94
   1  10   4  357.03   20.21
  -1 -10  -5  351.41   21.20
   1  10   5  340.74   20.53
  -1 -10  -6  234.22   18.30
   1  10   6  219.19   17.97
  -1 -10  -7  111.02   14.93
   1  10   7  109.55   14.87
  -1 -10  -8  152.78   15.85
   1  10   8  171.38   18.48
  -1 -11   0  325.88   22.01
  -1 -11  -1  381.38   23.78
   1  11   1  394.24   21.87
  -1 -11  -2  233.81   19.51
   1  11   2  230.90   18.18
  -1 -11  -3  305.10   21.71
   1  11   3  284.61   20.06
  -1 -11  -4  175.08   17.59
   1  11   4  159.20   16.52
  -1 -11  -5  183.06   18.29
   1  11   5  178.34   17.33
  -1 -11  -6  211.59   18.97
   1  11   6  207.04   18.76
  -1 -12   0  346.54   24.32
   1  12   0  389.12   23.06
  -1 -12  -1  160.07   18.61
   1  12   1  195.11   18.34
  -1 -12  -2  325.06   23.85
   1  12   2  324.72   21.98
  -1 -12  -3  145.71   19.79
   1  12   3  137.03   16.59
  -1 -12  -4  148.51   18.41
   1  12   4  158.92   17.73
  -1 -13   0  165.59   20.26
   1  13   0  186.69   20.02
  -2  13  -1   89.71   13.85
   2 -13   1   61.80   14.10
  -2  13  -2  166.91   17.48
   2 -13   2  160.36   19.16
  -2  13  -3  214.33   18.48
   2 -13   3  203.44   20.42
  -2  13  -4  235.61   18.92
   2 -13   4  179.50   19.89
  -2  13  -5  214.34   18.47
   2 -13   5  186.55   19.99
  -2  13  -6   68.15   12.75
   2 -13   6   69.14   15.39
  -2  13  -7  163.59   17.68
   2 -13   7  146.14   20.43
  -2  12  -1  231.71   17.87
   2 -12   1  198.95   19.12
  -2  12  -2  235.89   17.72
   2 -12   2  189.83   19.05
  -2  12  -3  278.06   18.59
   2 -12   3  225.05   20.03
  -2  12  -4  253.88   17.89
   2 -12   4  243.76   20.58
  -2  12  -5   99.38   11.17
  -2  12  -5  112.35   13.82
   2 -12   5   98.29   15.64
  -2  12  -6  182.88   14.26
  -2  12  -6  207.04   16.94
   2 -12   6  166.86   18.65
  -2  12  -7   80.80   12.01
  -2  12  -7  111.17   14.32
   2 -12   7  100.69   16.84
  -2  12  -8  116.02   14.30
  -2  12  -8  136.02   16.01
   2 -12   8  126.26   17.88
  -2  12  -9  118.53   15.69
  -2  12  -9  149.41   17.30
   2 -12   9  121.71   17.60
  -2  11  -1  312.63   13.74
  -2  11  -1  363.55   19.55
   2 -11   1  286.80   19.77
  -2  11  -2  401.51   15.95
  -2  11  -2  473.09   21.53
   2 -11   2  389.89   23.30
  -2  11  -3  372.04   16.04
  -2  11  -3  462.57   21.07
   2 -11   3  372.70   22.24
  -2  11  -4  223.71   13.41
  -2  11  -4  258.59   16.56
   2 -11   4  220.24   18.77
  -2  11  -5  127.00   11.90
  -2  11  -5  145.17   13.70
   2 -11   5  108.04   15.96
  -2  11  -6  127.46   12.55
  -2  11  -6  142.59   13.84
   2 -11   6  147.05   16.61
  -2  11  -7  106.88   12.91
  -2  11  -7  116.73   13.91
   2 -11   7  107.29   16.03
  -2  11  -8  236.52   17.58
  -2  11  -8  275.47   18.89
   2 -11   8  239.15   20.05
  -2  11  -9  188.53   17.64
   2 -11   9  208.11   16.80
   2 -11   9  209.02   19.05
  -2  11 -10  218.73   19.72
   2 -11  10  234.66   18.41
   2 -11  10  244.46   21.06
  -2  11 -11  263.95   21.43
   2 -11  11  281.86   20.70
   2 -11  11  273.09   21.28
  -2  10  -1  225.82   11.93
  -2  10  -1  240.05   15.04
   2 -10   1  222.44   16.83
  -2  10  -2  322.20   14.23
  -2  10  -2  406.28   18.46
   2 -10   2  339.55   20.64
  -2  10  -3  429.64   16.71
  -2  10  -3  492.11   19.81
   2 -10   3  413.34   21.91
  -2  10  -4  352.79   15.98
  -2  10  -4  441.17   18.94
   2 -10   4  375.42   21.81
  -2  10  -5  485.63   19.59
  -2  10  -5  561.68   21.21
   2 -10   5  468.24   24.16
  -2  10  -6  107.41   11.92
  -2  10  -6  124.39   12.37
   2 -10   6  120.90   14.74
  -2  10  -7  263.75   17.31
   2 -10   7  259.64   19.31
  -2  10  -8  264.51   18.49
   2 -10   8  289.22   17.33
   2 -10   8  269.66   19.71
  -2  10  -9  153.01   16.45
   2 -10   9  151.64   14.66
   2 -10   9  150.05   16.15
  -2  10 -10  174.73   18.21
   2 -10  10  172.15   16.04
   2 -10  10  160.92   16.54
  -2  10 -11  162.87   19.50
   2 -10  11  143.56   15.92
   2 -10  11  151.88   16.18
  -2  10 -12  204.14   22.30
   2 -10  12  221.69   19.11
   2 -10  12  218.12   18.52
  -2   9  -1  505.30   16.27
  -2   9  -1  568.69   19.39
   2  -9   1  478.00   22.39
  -2   9  -2  405.94   15.28
  -2   9  -2  453.88   17.51
   2  -9   2  397.80   20.69
  -2   9  -3  267.90   13.22
  -2   9  -3  320.54   15.01
   2  -9   3  290.65   18.39
  -2   9  -4  460.92   17.72
  -2   9  -4  512.45   18.56
   2  -9   4  460.70   22.39
  -2   9  -5  345.51   16.78
  -2   9  -5  371.53   16.57
   2  -9   5  300.78   18.97
  -2   9  -6  295.41   16.96
   2  -9   6  297.77   15.23
   2  -9   6  270.74   18.33
  -2   9  -7  412.63   20.70
   2  -9   7  393.91   18.01
   2  -9   7  402.43   21.71
  -2   9  -8  329.47   19.86
   2  -9   8  324.87   17.44
   2  -9   8  280.84   18.79
  -2   9  -9  169.66   16.52
   2  -9   9  162.82   14.29
   2  -9   9  154.43   15.22
  -2   9 -10  197.92   19.22
   2  -9  10  185.93   15.76
   2  -9  10  178.45   16.48
  -2   9 -11  239.78   20.97
   2  -9  11  227.73   17.47
   2  -9  11  273.02   19.34
  -2   9 -12  153.19   20.80
   2  -9  12  144.31   15.57
   2  -9  12  133.34   14.54
  -2   9 -13   74.10   16.46
   2  -9  13   58.34   12.07
  -2   8  -1  532.53   16.18
  -2   8  -1  595.99   17.78
   2  -8   1  488.71   20.52
  -2   8  -2  349.22   13.70
  -2   8  -2  401.08   14.85
   2  -8   2  319.68   17.03
  -2   8  -3  304.79   13.62
  -2   8  -3  350.67   14.08
   2  -8   3  308.19   17.41
  -2   8  -4  451.56   17.44
  -2   8  -4  491.29   16.71
   2  -8   4  436.05   19.91
  -2   8  -5  274.90   15.00
   2  -8   5  251.86   12.62
   2  -8   5  252.45   16.38
  -2   8  -6  269.64   16.42
   2  -8   6  276.23   13.84
   2  -8   6  245.75   16.33
  -2   8  -7  507.52   22.11
   2  -8   7  543.80   20.11
   2  -8   7  512.93   22.71
  -2   8  -8  308.83   19.40
   2  -8   8  322.43   16.55
   2  -8   8  286.83   17.90
  -2   8  -9  186.42   16.88
   2  -8   9  211.79   14.88
   2  -8   9  221.43   16.23
  -2   8 -10  249.87   19.87
   2  -8  10  264.78   17.04
   2  -8  10  276.00   17.65
  -2   8 -11  388.06   25.08
   2  -8  11  444.14   21.84
   2  -8  11  442.53   22.06
  -2   8 -12  174.56   20.95
   2  -8  12  189.92   16.36
   2  -8  12  211.06   16.16
  -2   8 -13   19.70   11.87
   2  -8  13   27.99    9.26
  -2   7  -1  221.47   10.38
  -2   7  -1  276.64   11.13
   2  -7   1  236.57   14.26
  -2   7  -2  281.56   12.02
  -2   7  -2  310.09   11.85
   2  -7   2  253.09   14.28
  -2   7  -3  429.71   15.67
  -2   7  -3  505.38   15.01
   2  -7   3  422.32   18.47
  -2   7  -4  769.51   22.18
   2  -7   4  766.37   19.36
   2  -7   4  697.50   23.43
  -2   7  -5  599.35   21.08
   2  -7   5  575.18   17.46
   2  -7   5  519.59   20.84
  -2   7  -6  522.32   21.11
   2  -7   6  489.81   17.04
   2  -7   6  446.62   19.73
  -2   7  -7  426.41   20.29
   2  -7   7  423.98   17.02
   2  -7   7  390.55   18.78
  -2   7  -8  511.27   23.16
   2  -7   8  530.31   19.77
   2  -7   8  495.51   21.17
  -2   7  -9  257.66   18.77
   2  -7   9  313.03   16.49
   2  -7   9  315.71   17.81
  -2   7 -10  303.33   21.02
   2  -7  10  361.51   18.39
   2  -7  10  404.15   19.85
  -2   7 -11  287.99   21.79
   2  -7  11  331.38   18.44
   2  -7  11  361.39   18.97
  -2   7 -12   63.89   14.58
   2  -7  12   76.50   11.87
   2  -7  12   75.57   10.88
  -2   7 -13   72.19   16.14
   2  -7  13   95.76   13.51
  -2   7 -14  158.66   22.56
   2  -7  14  172.56   16.77
  -2   6  -1  916.37   19.49
  -2   6  -1 1020.39   18.24
   2  -6   1  880.37   23.47
  -2   6  -2 1265.00   24.49
  -2   6  -2 1436.58   23.22
   2  -6   2 1273.33   28.67
  -2   6  -3  734.52   19.76
  -2   6  -3  809.36   17.64
   2  -6   3  701.21   21.41
  -2   6  -4  507.90   17.99
   2  -6   4  460.08   13.67
   2  -6   4  456.13   17.99
  -2   6  -5  550.82   20.08
   2  -6   5  484.62   14.92
   2  -6   5  485.10   18.72
  -2   6  -6  757.98   24.63
   2  -6   6  726.18   19.70
   2  -6   6  685.19   22.45
  -2   6  -7  796.53   26.56
   2  -6   7  836.48   22.49
   2  -6   7  806.85   24.72
  -2   6  -8  524.93   23.35
   2  -6   8  657.07   20.98
   2  -6   8  663.94   22.81
  -2   6  -9  209.29   17.01
   2  -6   9  295.94   15.42
   2  -6   9  294.03   15.94
  -2   6 -10  180.33   17.42
   2  -6  10  225.09   14.58
   2  -6  10  273.01   15.77
  -2   6 -11  226.96   20.28
   2  -6  11  296.00   17.01
   2  -6  11  321.67   17.06
  -2   6 -12   82.70   15.52
   2  -6  12  113.11   12.65
   2  -6  12   91.21    9.87
  -2   6 -13  257.51   23.50
   2  -6  13  319.83   19.20
  -2   6 -14  210.27   23.86
   2  -6  14  271.45   19.28
  -2   5  -1 2963.66   37.15
  -2   5  -1 3586.66   33.72
   2  -5   1 3078.45   42.36
  -2   5  -2 3485.09   43.38
  -2   5  -2 3989.77   44.22
   2  -5   2 3442.15   45.80
  -2   5  -3 1845.19   31.66
   2  -5   3 1702.01   25.69
   2  -5   3 1644.80   31.08
  -2   5  -4  388.71   15.91
   2  -5   4  336.16   10.81
   2  -5   4  365.15   15.06
  -2   5  -5  576.22   20.20
   2  -5   5  536.89   14.88
   2  -5   5  513.16   17.93
  -2   5  -6  195.85   13.70
   2  -5   6  167.97    9.34
   2  -5   6  184.04   11.72
  -2   5  -7  514.27   21.31
   2  -5   7  628.77   18.53
   2  -5   7  697.01   21.64
  -2   5  -8  392.02   20.24
   2  -5   8  585.71   19.06
   2  -5   8  638.29   21.19
  -2   5  -9  200.15   16.80
   2  -5   9  335.72   15.72
   2  -5   9  354.18   16.41
  -2   5 -10  369.39   22.77
   2  -5  10  542.45   20.54
   2  -5  10  626.45   21.64
  -2   5 -11   82.52   14.60
   2  -5  11  114.25   11.94
   2  -5  11  126.85   11.18
  -2   5 -12  230.07   21.09
   2  -5  12  333.77   18.72
   2  -5  12  291.21   14.82
  -2   5 -13  139.76   19.66
   2  -5  13  274.01   18.37
  -2   5 -14  212.71   23.51
   2  -5  14  310.98   20.08
  -2   5 -15  169.92   24.33
   2  -5  15  193.09   18.17
  -2   4  -1 2713.52   33.78
  -2   4  -1 3162.47   27.91
   2  -4   1 2897.82   38.89
  -2   4  -2 2196.16   31.42
   2  -4   2 2266.93   27.60
   2  -4   2 2146.62   33.45
  -2   4  -3  288.80   13.12
   2  -4   3  253.97    7.91
   2  -4   3  258.48   12.20
  -2   4  -4 1368.68   28.89
   2  -4   4 1079.55   19.83
   2  -4   4 1059.32   23.61
  -2   4  -5  727.83   22.32
   2  -4   5  677.78   16.01
   2  -4   5  690.38   19.48
  -2   4  -6  427.03   17.99
   2  -4   6  525.61   15.27
   2  -4   6  509.88   17.10
  -2   4  -7  219.36   14.78
   2  -4   7  296.79   12.65
   2  -4   7  316.58   14.22
  -2   4  -8  248.18   16.10
   2  -4   8  373.25   15.18
   2  -4   8  398.45   15.98
  -2   4  -9  342.77   20.32
   2  -4   9  565.79   19.79
   2  -4   9  594.65   19.50
  -2   4 -10  235.50   18.79
   2  -4  10  361.42   17.38
   2  -4  10  401.36   16.56
  -2   4 -11  176.13   18.35
   2  -4  11  294.81   16.75
   2  -4  11  301.83   14.71
  -2   4 -12  145.49   18.10
   2  -4  12  260.96   17.26
  -2   4 -13  118.47   18.32
   2  -4  13  217.60   17.21
  -2   4 -14  132.83   20.36
   2  -4  14  177.28   17.15
  -2   4 -15  109.54   19.72
   2  -4  15  174.82   18.20
  -2   3  -1 1702.42   24.28
  -2   3  -1 2012.47   17.39
   2  -3   1 1844.17   28.41
  -2   3  -2  945.29   19.35
   2  -3   2  912.42   13.24
   2  -3   2  928.68   20.17
  -2   3  -3  400.62   14.88
   2  -3   3  329.43    8.45
   2  -3   3  337.21   12.82
  -2   3  -4 1930.09   34.34
   2  -3   4 1597.50   23.88
   2  -3   4 1562.49   27.49
  -2   3  -5  755.92   22.70
   2  -3   5  798.83   17.17
   2  -3   5  802.34   19.76
  -2   3  -6  199.99   13.13
   2  -3   6  268.36   10.99
   2  -3   6  271.66   12.24
  -2   3  -7  140.18   12.51
   2  -3   7  201.00   10.76
   2  -3   7  241.23   11.70
  -2   3  -8  222.76   15.56
   2  -3   8  405.40   15.84
   2  -3   8  431.18   15.61
  -2   3  -9  661.81   26.61
   2  -3   9 1133.68   27.73
   2  -3   9 1201.53   26.33
  -2   3 -10  119.22   14.90
   2  -3  10  212.87   14.32
   2  -3  10  224.91   12.29
  -2   3 -11  225.96   19.79
   2  -3  11  406.74   19.79
   2  -3  11  420.91   16.10
  -2   3 -12   53.94   12.73
   2  -3  12  111.22   13.15
  -2   3 -13  210.75   21.96
   2  -3  13  310.93   20.10
  -2   3 -14  185.64   22.10
   2  -3  14  265.01   20.16
  -2   3 -15  100.20   19.31
   2  -3  15  173.07   18.28
  -2   2  -1 1232.55   19.19
   2  -2   1 1386.96   22.51
  -2   2  -2  348.98   11.51
   2  -2   2  352.73    6.88
   2  -2   2  349.24   11.62
  -2   2  -3 1533.36   27.64
   2  -2   3 1202.86   17.25
   2  -2   3 1245.42   22.48
  -2   2  -4  700.49   20.89
   2  -2   4  588.24   12.85
   2  -2   4  615.17   16.13
  -2   2  -5 1196.13   27.84
   2  -2   5 1353.87   22.07
   2  -2   5 1484.25   25.84
  -2   2  -6  585.26   20.63
   2  -2   6  781.20   18.22
   2  -2   6  864.80   19.94
  -2   2  -7  252.88   15.11
   2  -2   7  389.84   14.40
   2  -2   7  418.63   14.28
  -2   2  -8  500.54   21.77
   2  -2   8  815.79   22.35
   2  -2   8  880.67   21.05
  -2   2  -9  121.26   13.82
   2  -2   9  188.49   12.52
   2  -2   9  199.15   10.92
  -2   2 -10  373.23   22.02
   2  -2  10  666.39   23.62
   2  -2  10  703.40   19.50
  -2   2 -11  156.85   17.66
   2  -2  11  240.49   16.02
   2  -2  11  228.04   11.67
  -2   2 -12  244.69   21.18
   2  -2  12  403.16   21.08
  -2   2 -13  216.33   22.10
   2  -2  13  352.45   20.97
  -2   2 -14  113.82   18.70
   2  -2  14  209.77   18.04
  -2   2 -15  173.45   24.20
   2  -2  15  285.83   21.87
  -2   1  -1 1024.96   16.52
   2  -1   1 1227.93   13.71
   2  -1   1 1145.05   19.76
  -2   1  -2 2469.58   30.93
   2  -1   2 2423.17   25.78
   2  -1   2 2379.27   31.55
  -2   1  -3 1252.36   24.23
   2  -1   3  993.90   15.79
   2  -1   3 1009.42   19.89
  -2   1  -4  364.70   15.42
   2  -1   4  339.92   10.26
   2  -1   4  333.35   11.91
   2  -1   5   66.29    6.30
   2  -1   5   68.72    6.60
  -2   1  -6  242.12   13.77
   2  -1   6  365.63   13.06
   2  -1   6  407.63   13.45
  -2   1  -7  911.90   26.84
   2  -1   7 1464.95   28.55
   2  -1   7 1543.72   27.17
  -2   1  -8 1174.81   32.46
   2  -1   8 1902.33   35.70
   2  -1   8 2038.41   32.20
  -2   1  -9  608.41   25.49
   2  -1   9  955.90   26.62
   2  -1   9 1023.12   22.54
  -2   1 -10  423.39   23.19
   2  -1  10  694.38   24.33
   2  -1  10  698.47   18.90
  -2   1 -11  136.79   16.77
   2  -1  11  185.89   14.79
   2  -1  11  158.50    9.63
  -2   1 -12  170.58   18.61
   2  -1  12  237.83   17.22
  -2   1 -13  180.90   20.54
   2  -1  13  270.46   18.91
  -2   1 -14   96.18   17.88
   2  -1  14  120.50   14.80
  -2   1 -15  181.18   24.30
   2  -1  15  234.66   20.43
  -2   0   0 1293.29   18.59
  -2   0   0 1331.57   21.44
   2   0   0 1499.02   14.94
  -2   0  -1  607.61   11.78
  -2   0  -1  694.05   15.46
   2   0   1  750.93   11.27
  -2   0  -2 1649.46   23.42
  -2   0  -2 1579.22   25.27
   2   0   2 1577.81   20.98
  -2   0  -3 2075.94   31.06
  -2   0  -3 1690.88   27.19
   2   0   3 1700.90   23.66
  -2   0  -4 2189.99   35.49
   2   0   4 2143.12   29.71
   2   0   4 2337.41   34.12
  -2   0  -5  796.42   22.26
   2   0   5 1014.80   20.57
   2   0   5 1118.71   22.61
  -2   0  -6  204.71   12.83
   2   0   6  283.80   11.94
   2   0   6  316.52   12.25
  -2   0  -7  493.62   20.07
   2   0   7  741.87   20.36
   2   0   7  819.87   19.85
  -2   0  -8  237.10   16.07
   2   0   8  360.63   15.70
   2   0   8  395.49   14.06
  -2   0  -9 1082.27   33.29
   2   0   9 1678.75   35.91
   2   0   9 1785.29   30.78
  -2   0 -10  466.20   24.21
   2   0  10  686.28   24.19
   2   0  10  715.31   19.00
  -2   0 -11  193.12   18.94
   2   0  11  270.45   17.13
   2   0  11  248.15   11.52
  -2   0 -12  117.98   17.39
   2   0  12  186.38   15.92
  -2   0 -13  130.26   18.64
   2   0  13  185.54   16.78
  -2   0 -14  185.20   23.13
   2   0  14  203.99   17.86
  -2  -1   0  736.87   13.23
  -2  -1   0  687.38   15.56
   2   1   0  769.39   12.22
  -2  -1  -1 1692.44   20.51
  -2  -1  -1 1933.80   28.84
   2   1   1 2069.58   24.74
  -2  -1  -2 1290.28   19.27
  -2  -1  -2 1333.07   23.71
   2   1   2 1402.90   20.49
  -2  -1  -3 2617.02   34.22
  -2  -1  -3 2146.98   32.34
   2   1   3 2145.73   29.12
  -2  -1  -4 1322.10   25.96
  -2  -1  -4 1264.03   24.36
   2   1   4 1240.02   21.99
  -2  -1  -5  750.28   20.98
  -2  -1  -5  983.50   21.73
   2   1   5  934.89   20.30
  -2  -1  -6  833.23   23.46
  -2  -1  -6 1284.98   25.75
   2   1   6 1260.32   25.64
  -2  -1  -7  306.05   16.07
   2   1   7  438.27   16.10
  -2  -1  -8  297.61   17.86
   2   1   8  421.94   17.01
   2   1   8  474.14   15.76
  -2  -1  -9  254.13   18.67
   2   1   9  348.90   16.66
   2   1   9  398.41   14.61
  -2  -1 -10  258.26   19.85
   2   1  10  328.68   17.53
   2   1  10  392.27   14.45
  -2  -1 -11  118.17   15.97
   2   1  11  158.63   14.22
   2   1  11  135.97    8.98
  -2  -1 -12  167.18   19.28
   2   1  12  216.33   16.31
  -2  -1 -13  240.66   22.49
   2   1  13  302.35   20.20
  -2  -1 -14  133.72   20.60
   2   1  14  179.70   17.34
  -2  -2   0 2096.35   24.37
  -2  -2   0 2021.56   29.82
   2   2   0 2135.05   25.48
  -2  -2  -1 1359.79   17.06
  -2  -2  -1 1442.75   25.22
   2   2   1 1573.01   22.46
  -2  -2  -2 1061.14   16.20
  -2  -2  -2 1173.34   22.91
   2   2   2 1258.94   20.85
  -2  -2  -3 1684.81   24.86
  -2  -2  -3 1385.78   25.62
   2   2   3 1490.79   24.28
  -2  -2  -4 1236.62   24.09
  -2  -2  -4 1074.26   22.92
   2   2   4 1120.51   21.90
  -2  -2  -5  508.54   16.81
  -2  -2  -5  596.37   17.28
   2   2   5  615.46   17.25
  -2  -2  -6  432.13   17.10
  -2  -2  -6  584.59   17.45
   2   2   6  591.89   18.03
  -2  -2  -7  151.82   12.02
  -2  -2  -7  266.01   12.47
   2   2   7  245.79   12.94
  -2  -2  -8  147.39   12.82
  -2  -2  -8  211.34   11.43
   2   2   8  215.14   13.39
  -2  -2  -9  168.03   15.06
   2   2   9  239.37   14.93
   2   2   9  270.54   12.59
  -2  -2 -10  244.56   18.42
   2   2  10  293.37   16.89
   2   2  10  347.79   14.08
  -2  -2 -11  262.06   20.02
   2   2  11  350.05   19.47
  -2  -2 -12  201.18   20.36
   2   2  12  259.81   18.04
  -2  -2 -13  199.26   20.70
   2   2  13  275.75   19.39
  -2  -2 -14   78.39   16.48
   2   2  14   77.44   13.60
  -2  -3   0 2628.56   28.29
  -2  -3   0 2592.44   36.49
   2   3   0 2780.60   33.22
  -2  -3  -1 1074.26   14.46
  -2  -3  -1 1026.94   22.24
   2   3   1 1098.25   19.99
  -2  -3  -2  631.03   10.91
  -2  -3  -2  723.99   19.11
   2   3   2  796.17   17.84
  -2  -3  -3  584.42   12.60
  -2  -3  -3  550.08   16.95
   2   3   3  595.12   16.08
  -2  -3  -4  817.15   18.09
  -2  -3  -4  659.53   18.80
   2   3   4  700.76   18.37
  -2  -3  -5  375.23   13.94
  -2  -3  -5  424.64   15.50
   2   3   5  440.41   15.83
  -2  -3  -6  338.07   14.74
  -2  -3  -6  494.60   16.92
   2   3   6  499.21   17.71
  -2  -3  -7  484.60   19.23
  -2  -3  -7  671.12   19.97
   2   3   7  717.12   22.57
  -2  -3  -8  238.91   15.58
  -2  -3  -8  336.23   14.48
   2   3   8  315.51   16.28
  -2  -3  -9  207.89   16.26
  -2  -3  -9  271.67   13.44
   2   3   9  245.75   15.58
  -2  -3 -10  274.94   18.47
  -2  -3 -10  385.51   15.75
   2   3  10  381.68   19.78
  -2  -3 -11  124.31   16.14
   2   3  11  202.39   16.04
  -2  -3 -12  217.05   19.59
   2   3  12  281.83   19.28
  -2  -3 -13  143.34   19.90
   2   3  13  186.23   17.61
  -2  -4   0  821.77   11.53
  -2  -4   0  786.12   20.67
   2   4   0  856.94   11.60
   2   4   0  836.66   18.79
  -2  -4  -1  449.31    7.70
   2   4   1  560.34   10.13
   2   4   1  496.35   14.71
  -2  -4  -2  215.27    5.57
  -2  -4  -2  250.99   12.52
   2   4   2  237.67   10.98
  -2  -4  -3 1110.29   16.41
  -2  -4  -3 1198.45   26.39
   2   4   3 1281.19   25.44
  -2  -4  -4  869.30   17.05
  -2  -4  -4  777.69   21.59
   2   4   4  819.32   21.32
  -2  -4  -5  245.02   10.86
  -2  -4  -5  242.47   12.88
   2   4   5  249.81   13.17
  -2  -4  -6  264.65   13.03
  -2  -4  -6  329.04   14.92
   2   4   6  349.01   16.11
   2   4   6  316.99   13.69
  -2  -4  -7  453.36   18.24
  -2  -4  -7  634.49   20.56
   2   4   7  668.46   22.96
  -2  -4  -8  386.01   18.99
  -2  -4  -8  604.05   20.38
   2   4   8  622.02   23.42
  -2  -4  -9  405.10   19.86
  -2  -4  -9  585.58   20.36
   2   4   9  563.88   23.47
  -2  -4 -10  325.22   19.38
  -2  -4 -10  464.30   18.25
   2   4  10  480.18   22.90
  -2  -4 -11  138.71   15.38
   2   4  11  205.08   16.99
  -2  -4 -12  125.50   17.06
   2   4  12  136.06   15.70
  -2  -4 -13  131.58   17.84
   2   4  13  184.47   18.62
  -2  -5   0  709.01   21.26
   2   5   0  781.62   19.75
  -2  -5  -1  662.22   20.40
   2   5   1  733.94   19.40
  -2  -5  -2  666.39   20.60
   2   5   2  728.75   19.82
  -2  -5  -3 1008.72   12.33
  -2  -5  -3 1100.88   26.77
   2   5   3 1190.81   26.19
  -2  -5  -4  325.54    8.77
  -2  -5  -4  338.60   15.60
   2   5   4  385.48   16.01
  -2  -5  -5  238.56    9.67
  -2  -5  -5  217.20   13.17
   2   5   5  229.51   13.77
  -2  -5  -6  569.22   16.91
  -2  -5  -6  572.17   20.49
   2   5   6  583.52   21.67
  -2  -5  -7  723.43   21.28
  -2  -5  -7  849.17   25.31
   2   5   7  952.94   28.85
   2   5   7  924.65   25.77
  -2  -5  -8  185.38   12.67
  -2  -5  -8  272.68   15.01
   2   5   8  270.55   17.53
  -2  -5  -9  215.90   13.69
  -2  -5  -9  376.34   17.55
   2   5   9  367.48   20.65
  -2  -5 -10  175.76   13.94
  -2  -5 -10  353.74   17.05
   2   5  10  340.62   20.89
   2   5  11  390.89   23.45
   2   5  12  348.81   23.24
  -2  -6   0 1012.17   27.23
   2   6   0 1062.96   25.09
  -2  -6  -1  359.98   16.83
   2   6   1  373.75   15.54
  -2  -6  -2  866.70   25.33
   2   6   2  947.43   24.42
  -2  -6  -3  414.45   17.76
   2   6   3  460.68   17.89
  -2  -6  -4  231.71    6.80
  -2  -6  -4  257.14   14.94
   2   6   4  257.56   14.53
  -2  -6  -5  167.39   12.76
   2   6   5  155.09   12.77
  -2  -6  -6  778.41   25.04
   2   6   6  821.68   26.82
  -2  -6  -7  565.21   21.84
   2   6   7  620.36   24.79
   2   6   7  598.63   22.13
  -2  -6  -8  389.39   18.85
   2   6   8  395.38   21.72
  -2  -6  -9  200.19   14.39
   2   6   9  215.86   17.93
  -2  -6 -10  320.30   17.39
   2   6  10  335.16   21.97
   2   6  11  339.00   23.49
  -2  -7   0 1037.05   29.35
   2   7   0 1155.02   28.23
   2   7   1  978.53   26.21
  -2  -7  -1  941.26   27.95
  -2  -7  -2  309.33   17.08
   2   7   2  279.58   15.32
  -2  -7  -3  163.21   13.34
   2   7   3  167.29   12.94
  -2  -7  -4  147.09   12.85
   2   7   4  151.30   13.22
  -2  -7  -5  332.22   17.88
   2   7   5  328.75   18.04
  -2  -7  -6  558.20   22.68
   2   7   6  572.81   23.78
  -2  -7  -7  294.00   17.32
   2   7   7  290.03   19.03
   2   7   7  278.85   16.92
  -2  -7  -8  260.55   16.97
   2   7   8  252.57   18.88
  -2  -7  -9  305.62   18.22
   2   7   9  324.06   21.78
  -2  -7 -10  260.64   17.11
   2   7  10  269.35   21.28
  -2  -8   0  146.95   13.33
   2   8   0  146.57   13.08
  -2  -8  -1  596.73   24.04
   2   8   1  620.16   22.75
  -2  -8  -2  475.04   21.89
   2   8   2  523.34   21.44
  -2  -8  -3  536.47   22.78
   2   8   3  562.26   22.59
  -2  -8  -4  288.11   17.77
   2   8   4  284.83   17.29
  -2  -8  -5  379.17   20.06
   2   8   5  401.28   20.63
  -2  -8  -6  173.46   14.87
   2   8   6  209.77   16.75
  -2  -8  -7  269.41   17.69
   2   8   7  256.27   19.60
  -2  -8  -8  129.49   13.61
   2   8   8  158.55   17.14
   2   8   8  132.56   14.53
  -2  -8  -9  193.76   15.81
   2   8   9  176.41   18.56
  -2  -9   0  316.79   19.41
   2   9   0  349.26   18.96
  -2  -9  -1  278.22   18.98
   2   9   1  313.47   18.31
  -2  -9  -2  419.89   22.34
   2   9   2  387.26   20.31
  -2  -9  -3  348.12   20.56
   2   9   3  367.62   20.27
  -2  -9  -4  347.59   20.53
   2   9   4  357.81   20.62
  -2  -9  -5  181.97   16.48
   2   9   5  164.51   15.82
  -2  -9  -6  243.91   18.55
   2   9   6  252.77   19.12
  -2  -9  -7  223.14   17.48
   2   9   7  238.98   19.70
  -2  -9  -8  285.28   19.36
   2   9   8  300.96   22.37
   2   9   8  283.59   20.08
  -2 -10   0  381.34   23.08
   2  10   0  421.64   21.88
  -2 -10  -1  440.20   24.40
   2  10   1  460.72   23.09
  -2 -10  -2  325.76   21.55
   2  10   2  325.54   20.45
  -2 -10  -3  243.67   19.08
   2  10   3  271.24   19.40
  -2 -10  -4  216.50   18.27
   2  10   4  210.57   17.93
  -2 -10  -5  138.92   15.66
   2  10   5  107.70   14.93
  -2 -10  -6  177.49   17.21
   2  10   6  188.16   18.72
  -2 -10  -7  159.85   16.64
  -2 -11   0  412.56   25.44
   2  11   0  366.50   22.11
  -2 -11  -1  202.98   19.48
   2  11   1  243.53   19.31
  -2 -11  -2  141.81   17.37
   2  11   2  162.80   17.42
  -2 -11  -3  148.62   17.49
   2  11   3  144.79   17.01
  -2 -11  -4  109.38   16.19
   2  11   4  120.93   17.00
  -2 -11  -5  226.92   19.85
   2  11   5  205.63   19.80
  -2 -12   0  188.82   20.46
   2  12   0  200.40   19.52
  -2 -12  -1  250.09   22.53
   2  12   1  284.69   21.84
  -2 -12  -2  237.70   21.96
   2  12   2  260.38   21.54
  -3  13  -1  234.98   18.54
   3 -13   1  187.61   20.84
  -3  13  -2  150.41   14.83
   3 -13   2  156.59   18.60
  -3  13  -3  172.11   15.26
   3 -13   3  167.88   19.87
  -3  13  -4  180.29   22.20
   3 -13   4  209.38   21.50
   3 -13   5  107.36   17.80
  -3  13  -6  194.83   17.78
   3 -13   6  162.73   20.24
  -3  12  -1  180.38   13.41
  -3  12  -1  232.81   17.71
   3 -12   1  164.96   18.83
  -3  12  -2  136.27   12.22
  -3  12  -2  184.54   15.80
   3 -12   2  117.85   16.71
  -3  12  -3  174.30   14.10
  -3  12  -3  217.19   16.46
   3 -12   3  185.29   19.61
  -3  12  -4  222.59   15.74
  -3  12  -4  240.66   16.35
   3 -12   4  223.89   20.85
  -3  12  -5  282.94   18.41
  -3  12  -5  255.59   16.40
   3 -12   5  243.51   21.85
  -3  12  -6  220.84   17.50
  -3  12  -6  174.94   18.26
   3 -12   6  230.44   21.82
  -3  12  -7   68.41   12.47
   3 -12   7   73.36   15.35
  -3  12  -8  110.56   15.52
   3 -12   8  157.16   20.80
  -3  11  -1  266.49   15.10
  -3  11  -1  360.69   18.54
   3 -11   1  230.04   18.90
  -3  11  -2  252.60   15.13
  -3  11  -2  313.57   17.49
   3 -11   2  241.08   20.27
  -3  11  -3  211.22   14.70
  -3  11  -3  278.72   16.64
   3 -11   3  194.79   18.81
  -3  11  -4   92.88   11.88
  -3  11  -4   99.44   11.80
   3 -11   4   83.36   14.90
  -3  11  -5  360.95   19.80
  -3  11  -5  359.51   17.56
   3 -11   5  344.31   23.67
  -3  11  -6  102.43   13.47
  -3  11  -6  111.52   11.47
   3 -11   6  104.76   16.49
  -3  11  -7  277.89   19.54
  -3  11  -7  238.75   15.27
   3 -11   7  290.80   22.55
  -3  11  -8  184.90   17.72
  -3  11  -8  199.87   18.74
   3 -11   8  245.45   21.24
  -3  11  -9  110.24   15.76
   3 -11   9  103.27   16.63
  -3  11 -10   58.45   12.87
   3 -11  10   88.26   16.31
  -3  10  -1  238.24   14.11
  -3  10  -1  298.78   15.84
   3 -10   1  217.73   17.48
  -3  10  -2  272.34   15.31
  -3  10  -2  354.65   16.77
   3 -10   2  274.00   20.17
  -3  10  -3  106.80   11.61
  -3  10  -3  108.50   11.23
   3 -10   3  101.70   14.89
  -3  10  -4  333.44   17.74
  -3  10  -4  361.44   16.58
   3 -10   4  300.56   20.85
  -3  10  -5  177.74   14.58
  -3  10  -5  204.02   13.44
   3 -10   5  171.04   17.46
  -3  10  -6  180.63   15.35
  -3  10  -6  175.14   12.89
   3 -10   6  173.06   17.75
  -3  10  -7  186.33   16.53
  -3  10  -7  184.72   13.32
   3 -10   7  192.73   18.42
  -3  10  -8  272.43   19.46
   3 -10   8  297.48   17.03
   3 -10   8  314.23   22.29
  -3  10  -9  192.48   17.60
   3 -10   9  227.05   16.28
   3 -10   9  204.68   19.14
  -3  10 -10  111.70   15.84
   3 -10  10  140.16   20.54
   3 -10  10  140.87   18.40
  -3  10 -11  194.58   19.37
   3 -10  11  220.49   20.07
  -3   9  -1  215.11   13.22
  -3   9  -1  269.55   13.66
   3  -9   1  203.80   16.53
  -3   9  -2  282.81   15.30
  -3   9  -2  352.21   15.15
   3  -9   2  263.61   18.61
  -3   9  -3  264.05   15.20
  -3   9  -3  313.34   14.50
   3  -9   3  232.71   17.77
  -3   9  -4  467.99   20.18
  -3   9  -4  573.82   18.74
   3  -9   4  462.22   23.58
  -3   9  -5  277.68   17.01
  -3   9  -5  318.24   14.68
   3  -9   5  245.09   17.79
  -3   9  -6  284.39   17.72
  -3   9  -6  366.45   16.10
   3  -9   6  301.59   20.21
  -3   9  -7  219.97   16.57
   3  -9   7  222.25   13.53
   3  -9   7  198.46   17.59
  -3   9  -8  287.27   19.04
   3  -9   8  318.65   16.72
   3  -9   8  301.57   20.73
  -3   9  -9  248.12   18.91
   3  -9   9  309.51   17.56
   3  -9   9  281.95   20.20
  -3   9 -10  150.37   17.28
   3  -9  10  147.51   14.10
   3  -9  10  142.07   16.77
  -3   9 -11  255.49   20.95
   3  -9  11  294.58   18.84
   3  -9  11  282.07   20.82
  -3   9 -12   88.96   15.83
   3  -9  12  106.89   15.19
  -3   8  -1  190.29   12.06
  -3   8  -1  229.75   11.51
   3  -8   1  198.86   15.47
  -3   8  -2  414.18   17.23
  -3   8  -2  531.20   16.14
   3  -8   2  423.00   20.41
  -3   8  -3 1234.40   30.66
  -3   8  -3 1456.08   26.70
   3  -8   3 1122.68   32.36
  -3   8  -4  328.93   17.17
  -3   8  -4  419.61   14.79
   3  -8   4  334.13   19.25
  -3   8  -5  414.42   19.92
  -3   8  -5  481.64   16.38
   3  -8   5  415.26   21.34
  -3   8  -6  206.73   15.43
   3  -8   6  224.84   12.08
   3  -8   6  209.34   16.51
  -3   8  -7  334.49   19.21
   3  -8   7  366.63   15.95
   3  -8   7  335.84   20.06
  -3   8  -8  464.28   23.14
   3  -8   8  518.86   19.95
   3  -8   8  520.10   24.35
  -3   8  -9  179.66   16.46
   3  -8   9  228.44   14.94
   3  -8   9  230.79   18.05
  -3   8 -10  151.79   16.78
   3  -8  10  210.78   15.43
   3  -8  10  202.83   16.76
  -3   8 -11  131.58   17.37
   3  -8  11  170.48   15.06
   3  -8  11  188.73   16.89
  -3   8 -12  147.87   19.50
   3  -8  12  137.22   14.40
   3  -8  12  179.34   16.40
  -3   7  -1  677.12   20.35
  -3   7  -1  823.33   17.67
   3  -7   1  695.25   24.10
  -3   7  -2 1788.41   34.78
  -3   7  -2 2198.00   29.03
   3  -7   2 1655.21   36.69
  -3   7  -3  945.93   25.83
  -3   7  -3 1112.98   20.67
   3  -7   3  861.03   26.82
  -3   7  -4  426.18   18.72
  -3   7  -4  472.68   14.14
   3  -7   4  365.91   18.27
  -3   7  -5  318.37   17.11
   3  -7   5  351.50   12.95
   3  -7   5  312.61   17.85
  -3   7  -6  230.55   15.99
   3  -7   6  236.40   11.71
   3  -7   6  236.79   16.16
  -3   7  -7  217.57   16.17
   3  -7   7  228.69   12.50
   3  -7   7  218.68   15.91
  -3   7  -8  303.38   18.90
   3  -7   8  347.33   15.91
   3  -7   8  326.42   18.83
  -3   7  -9  278.57   19.23
   3  -7   9  306.69   16.08
   3  -7   9  294.77   18.17
  -3   7 -10  300.11   20.90
   3  -7  10  342.54   17.57
   3  -7  10  342.62   19.49
  -3   7 -11  215.86   19.97
   3  -7  11  226.52   15.54
   3  -7  11  243.19   16.94
  -3   7 -12  139.09   18.92
   3  -7  12  161.32   14.76
   3  -7  12  139.67   14.02
  -3   7 -13  115.54   18.87
   3  -7  13  126.83   14.41
  -3   6  -1  721.97   19.98
  -3   6  -1  860.75   15.59
   3  -6   1  739.02   23.12
  -3   6  -2 1676.09   32.23
  -3   6  -2 2040.52   24.24
   3  -6   2 1607.65   34.20
  -3   6  -3  448.22   17.92
  -3   6  -3  528.49   12.51
   3  -6   3  422.99   18.40
  -3   6  -4  419.92   18.17
   3  -6   4  399.16   11.77
   3  -6   4  340.43   16.55
  -3   6  -5  702.84   24.04
   3  -6   5  707.52   17.46
   3  -6   5  654.50   22.79
  -3   6  -6  499.11   21.42
   3  -6   6  526.68   16.03
   3  -6   6  514.37   21.00
  -3   6  -7  245.27   16.72
   3  -6   7  258.91   12.41
   3  -6   7  255.57   15.79
  -3   6  -8   80.85   12.24
   3  -6   8  108.36    9.70
   3  -6   8   95.52   11.49
  -3   6  -9  231.17   18.08
   3  -6   9  253.99   14.27
   3  -6   9  231.98   15.66
  -3   6 -10  338.83   21.90
   3  -6  10  326.03   16.56
   3  -6  10  319.96   18.29
  -3   6 -11  295.10   22.53
   3  -6  11  275.76   16.28
   3  -6  11  284.33   17.49
  -3   6 -12  163.68   19.82
   3  -6  12  156.10   13.90
   3  -6  12  167.60   13.85
  -3   6 -13  131.25   20.73
   3  -6  13  140.01   14.30
  -3   5  -1  479.27   15.76
  -3   5  -1  566.86   10.35
   3  -5   1  468.38   17.67
  -3   5  -2  590.16   18.35
  -3   5  -2  715.94   11.32
   3  -5   2  564.56   19.19
  -3   5  -3  413.93   16.72
   3  -5   3  389.79   16.77
  -3   5  -4  494.52   19.09
   3  -5   4  492.77   12.10
   3  -5   4  479.72   18.70
  -3   5  -5  591.37   21.87
   3  -5   5  557.07   14.36
   3  -5   5  524.79   19.87
  -3   5  -6  556.89   22.19
   3  -5   6  553.43   15.61
   3  -5   6  526.73   20.15
  -3   5  -7  258.22   16.98
   3  -5   7  263.26   12.05
   3  -5   7  275.64   15.44
  -3   5  -8  321.97   18.69
   3  -5   8  322.42   14.18
   3  -5   8  310.74   16.54
  -3   5  -9  419.01   22.70
   3  -5   9  409.37   16.95
   3  -5   9  421.02   19.31
  -3   5 -10  243.66   19.87
   3  -5  10  265.38   14.87
   3  -5  10  290.72   16.43
  -3   5 -11  193.34   19.22
   3  -5  11  179.03   13.49
   3  -5  11  188.01   14.08
  -3   5 -12  106.01   17.17
   3  -5  12  121.10   12.82
   3  -5  12  109.69   11.42
  -3   5 -13  189.70   22.67
   3  -5  13  166.99   15.23
  -3   5 -14  160.87   23.47
   3  -5  14  174.23   16.16
  -3   4  -1  206.85   10.63
   3  -4   1  198.48   11.69
  -3   4  -2  685.16   19.07
   3  -4   2  652.10   19.59
  -3   4  -3  830.35   22.32
   3  -4   3  848.02   13.54
   3  -4   3  785.14   21.82
  -3   4  -4  961.44   25.77
   3  -4   4  882.87   16.41
   3  -4   4  837.29   23.17
  -3   4  -5  628.98   22.22
   3  -4   5  531.49   13.40
   3  -4   5  534.41   19.06
  -3   4  -6  357.46   18.10
   3  -4   6  312.17   11.49
   3  -4   6  317.89   15.35
  -3   4  -7  243.44   15.82
   3  -4   7  255.15   11.70
   3  -4   7  229.53   13.72
  -3   4  -8  463.51   22.39
   3  -4   8  425.04   15.94
   3  -4   8  436.35   18.60
  -3   4  -9  574.51   26.27
   3  -4   9  603.23   20.05
   3  -4   9  618.08   21.98
  -3   4 -10  351.90   22.35
   3  -4  10  370.22   17.26
   3  -4  10  405.48   18.24
  -3   4 -11  353.26   23.90
   3  -4  11  363.89   18.33
   3  -4  11  382.63   17.84
  -3   4 -12  183.13   20.74
   3  -4  12  228.55   16.42
   3  -4  12  175.50   12.40
  -3   4 -13  165.03   22.21
   3  -4  13  182.33   15.83
  -3   4 -14  210.50   26.51
   3  -4  14  223.47   18.49
  -3   3  -1  591.43   15.92
   3  -3   1  633.93   18.23
  -3   3  -2  343.99   13.48
   3  -3   2  343.71   13.95
  -3   3  -3  924.81   23.13
   3  -3   3  847.13   13.48
   3  -3   3  843.60   21.96
  -3   3  -4  578.91   19.89
   3  -3   4  489.39   11.27
   3  -3   4  481.67   17.24
  -3   3  -5  844.75   25.07
   3  -3   5  755.20   16.17
   3  -3   5  774.53   22.05
  -3   3  -6  405.90   18.96
   3  -3   6  347.81   12.23
   3  -3   6  353.03   15.86
  -3   3  -7  402.80   20.02
   3  -3   7  368.73   13.87
   3  -3   7  385.06   16.56
  -3   3  -8  982.12   31.26
   3  -3   8  960.88   23.71
   3  -3   8 1021.88   26.61
  -3   3  -9  591.38   26.33
   3  -3   9  637.28   21.11
   3  -3   9  663.40   21.98
  -3   3 -10  808.69   32.26
   3  -3  10  974.88   27.72
   3  -3  10  956.89   26.42
  -3   3 -11  236.19   20.80
   3  -3  11  282.75   17.06
   3  -3  11  293.36   15.53
  -3   3 -12  115.68   18.95
   3  -3  12  112.24   13.27
   3  -3  12  102.77    9.60
  -3   3 -13  157.45   22.62
   3  -3  13  185.59   16.64
  -3   3 -14  117.60   20.83
   3  -3  14  159.65   16.82
  -3   2  -1  810.80   18.11
   3  -2   1  871.60   20.78
  -3   2  -2 1418.69   25.64
   3  -2   2 1513.91   28.18
  -3   2  -3  859.94   21.74
   3  -2   3  762.88   12.17
   3  -2   3  803.22   20.94
  -3   2  -4 1403.00   29.91
   3  -2   4 1164.52   17.82
   3  -2   4 1258.80   26.79
  -3   2  -5 1089.09   27.95
   3  -2   5  904.40   17.66
   3  -2   5  966.84   24.16
  -3   2  -6  657.72   23.16
  -3   2  -6  527.00   11.32
   3  -2   6  568.06   15.68
   3  -2   6  597.63   19.69
  -3   2  -7  441.40   20.72
   3  -2   7  426.56   15.19
   3  -2   7  453.32   17.71
  -3   2  -8  232.39   17.28
   3  -2   8  254.99   13.37
   3  -2   8  245.47   13.83
  -3   2  -9  437.14   23.18
   3  -2   9  464.46   18.64
   3  -2   9  517.67   19.20
  -3   2 -10  741.85   30.95
   3  -2  10  958.00   28.25
   3  -2  10  984.27   26.30
  -3   2 -11  398.13   25.11
   3  -2  11  510.30   22.33
   3  -2  11  507.86   19.21
  -3   2 -12  109.74   18.18
   3  -2  12  160.58   14.91
  -3   2 -13  116.10   19.64
   3  -2  13  131.60   14.97
  -3   2 -14   71.48   17.61
   3  -2  14   91.77   14.40
  -3   1  -1  511.88   13.94
   3  -1   1  576.30    9.19
   3  -1   1  588.70   17.13
  -3   1  -2 1585.93   26.35
   3  -1   2 1710.31   21.38
   3  -1   2 1715.89   30.11
  -3   1  -3 1257.67   25.35
   3  -1   3 1273.12   19.22
   3  -1   3 1287.51   26.50
  -3   1  -4 1635.14   31.61
   3  -1   4 1414.70   22.46
   3  -1   4 1515.56   29.77
  -3   1  -5 1026.95   26.82
   3  -1   5  894.94   19.03
   3  -1   5  904.11   23.27
  -3   1  -6  707.54   23.65
   3  -1   6  607.07   17.06
   3  -1   6  639.14   20.18
  -3   1  -7 1185.15   32.31
   3  -1   7 1151.23   25.81
   3  -1   7 1204.47   28.41
  -3   1  -8   95.04   13.26
   3  -1   8   96.38    9.89
   3  -1   8   84.46    8.99
  -3   1  -9  222.50   18.32
   3  -1   9  278.30   15.35
   3  -1   9  273.81   14.39
  -3   1 -10   64.65   13.26
   3  -1  10   91.31   11.22
   3  -1  10   93.18    9.86
  -3   1 -11  188.10   18.98
   3  -1  11  235.11   16.32
   3  -1  11  216.48   13.29
  -3   1 -12  235.85   22.10
   3  -1  12  322.71   19.61
  -3   1 -13  245.71   25.77
   3  -1  13  290.38   20.04
  -3   1 -14  229.01   24.78
   3  -1  14  267.79   20.19
  -3   0   0  658.41   15.40
  -3   0   0  687.30   18.25
   3   0   0  745.18   12.01
  -3   0  -1 2174.71   29.10
  -3   0  -1 2358.89   35.67
   3   0   1 2530.78   28.19
  -3   0  -2  486.30   13.71
  -3   0  -2  521.31   16.52
   3   0   2  505.41   11.08
  -3   0  -3 1019.93   21.85
   3   0   3 1019.77   18.12
   3   0   3 1085.13   24.52
  -3   0  -4 1076.83   24.67
   3   0   4  994.91   19.55
   3   0   4 1022.64   24.41
  -3   0  -5  470.78   17.80
   3   0   5  412.79   13.52
   3   0   5  426.33   16.25
  -3   0  -6  746.79   23.90
   3   0   6  633.69   18.12
   3   0   6  658.26   20.49
  -3   0  -7  164.64   13.89
   3   0   7  166.69   10.85
   3   0   7  182.30   11.99
  -3   0  -8  573.40   24.40
   3   0   8  544.48   19.51
   3   0   8  594.20   20.27
  -3   0  -9  154.70   16.19
   3   0   9  186.30   13.21
   3   0   9  207.48   12.84
  -3   0 -10  305.48   20.85
   3   0  10  326.13   17.61
   3   0  10  373.31   16.55
  -3   0 -11  150.87   17.65
   3   0  11  189.22   15.19
   3   0  11  193.36   12.45
  -3   0 -12  136.42   18.76
   3   0  12  162.01   15.30
  -3   0 -13  191.43   23.34
   3   0  13  293.05   20.14
  -3   0 -14  118.35   20.31
  -3  -1   0 1575.74   23.97
  -3  -1   0 1523.20   28.15
   3   1   0 1730.53   22.32
  -3  -1  -1 1405.96   22.08
  -3  -1  -1 1456.44   27.99
   3   1   1 1695.78   23.06
  -3  -1  -2  590.48   14.37
  -3  -1  -2  617.54   18.38
   3   1   2  678.01   14.52
  -3  -1  -3  394.43   12.86
  -3  -1  -3  412.16   15.70
   3   1   3  432.46   12.26
  -3  -1  -4  750.21   19.56
  -3  -1  -4  698.92   20.38
   3   1   4  698.02   16.89
  -3  -1  -5  610.15   19.43
  -3  -1  -5  507.66   18.05
   3   1   5  530.03   15.91
  -3  -1  -6  526.32   19.66
  -3  -1  -6  471.02   17.85
   3   1   6  434.80   15.62
  -3  -1  -7  313.08   16.70
   3   1   7  295.45   14.11
   3   1   7  288.69   14.53
  -3  -1  -8  454.79   21.22
   3   1   8  462.87   18.45
   3   1   8  541.85   19.74
  -3  -1  -9  235.51   17.37
   3   1   9  237.53   14.52
   3   1   9  263.58   14.27
  -3  -1 -10  402.21   22.49
   3   1  10  442.36   20.12
   3   1  10  468.70   18.51
  -3  -1 -11  303.09   22.04
   3   1  11  357.57   19.54
   3   1  11  315.10   15.37
  -3  -1 -12  123.36   18.14
   3   1  12  142.83   14.69
  -3  -1 -13  193.91   22.03
   3   1  13  242.12   18.79
  -3  -2   0  964.84   17.59
  -3  -2   0  949.90   22.87
   3   2   0 1049.12   18.92
  -3  -2  -1  211.43    8.33
  -3  -2  -1  216.91   12.00
   3   2   1  241.33    9.65
  -3  -2  -2  269.68    9.34
   3   2   2  332.21   11.47
  -3  -2  -3  873.10   18.05
  -3  -2  -3  932.37   24.00
   3   2   3  984.02   20.54
  -3  -2  -4 1029.36   21.78
  -3  -2  -4 1012.36   25.35
   3   2   4 1081.11   22.83
  -3  -2  -5  984.35   23.56
  -3  -2  -5  927.33   24.99
   3   2   5  929.60   22.54
  -3  -2  -6   36.81    7.46
  -3  -2  -6   33.09    7.11
   3   2   6   40.74    6.85
  -3  -2  -7  921.67   26.71
  -3  -2  -7  813.88   24.26
   3   2   7  829.75   23.86
  -3  -2  -8  397.94   19.82
  -3  -2  -8  370.92   16.93
   3   2   8  388.95   17.51
  -3  -2  -9  533.78   23.53
   3   2   9  535.79   21.64
   3   2   9  586.98   21.02
  -3  -2 -10  428.96   22.82
   3   2  10  464.44   21.39
   3   2  10  447.54   18.49
  -3  -2 -11  206.46   18.74
   3   2  11  199.19   16.06
   3   2  11  196.70   12.62
  -3  -2 -12  219.29   21.28
   3   2  12  228.68   17.84
  -3  -2 -13  109.96   17.87
   3   2  13  113.31   15.17
  -3  -3   0  888.11   16.14
  -3  -3   0  879.48   23.16
   3   3   0  989.76   20.41
  -3  -3  -1 1057.28   17.52
  -3  -3  -1 1014.68   25.21
   3   3   1 1165.44   22.53
  -3  -3  -2  471.68   11.64
  -3  -3  -2  485.67   17.87
   3   3   2  532.46   15.85
  -3  -3  -3  550.87   13.34
  -3  -3  -3  611.77   20.55
   3   3   3  675.05   18.49
  -3  -3  -4  883.80   18.93
  -3  -3  -4  931.05   25.61
   3   3   4  992.34   23.40
  -3  -3  -5  114.13    8.41
  -3  -3  -5  132.45   11.30
   3   3   5  129.92   10.38
   3   3   5  128.15    8.05
  -3  -3  -6  385.54   15.52
  -3  -3  -6  378.05   17.54
   3   3   6  385.59   16.55
  -3  -3  -7  720.14   22.64
  -3  -3  -7  664.05   22.74
   3   3   7  681.49   23.00
  -3  -3  -8  602.93   22.36
  -3  -3  -8  603.16   21.88
   3   3   8  578.22   22.42
  -3  -3  -9  241.40   16.17
  -3  -3  -9  225.13   14.52
   3   3   9  234.40   15.68
  -3  -3 -10  241.74   17.88
   3   3  10  244.36   16.80
   3   3  10  281.81   15.61
  -3  -3 -11  394.14   22.32
   3   3  11  403.15   22.14
   3   3  11  303.61   15.55
  -3  -3 -12  351.67   23.03
   3   3  12  415.68   23.37
  -3  -4   0  723.46   13.73
  -3  -4   0  733.75   22.65
   3   4   0  808.48   20.13
  -3  -4  -1 1074.62   17.09
  -3  -4  -1 1119.15   28.05
   3   4   1 1225.38   25.25
  -3  -4  -2  868.76   15.04
  -3  -4  -2  881.89   25.30
   3   4   2  968.84   22.99
  -3  -4  -3  574.47   12.71
  -3  -4  -3  598.48   21.33
   3   4   3  653.78   19.79
  -3  -4  -4  411.94   11.77
  -3  -4  -4  436.61   18.74
   3   4   4  469.57   17.75
  -3  -4  -5   65.06    6.37
  -3  -4  -5   75.50   10.45
   3   4   5   67.64    9.15
  -3  -4  -6  433.86   15.03
  -3  -4  -6  436.60   19.34
   3   4   6  461.95   19.28
   3   4   6  435.97   15.74
  -3  -4  -7  629.53   19.73
  -3  -4  -7  603.15   22.68
   3   4   7  633.60   23.43
  -3  -4  -8  483.15   18.70
  -3  -4  -8  436.18   19.62
   3   4   8  474.35   21.60
  -3  -4  -9  251.75   15.27
  -3  -4  -9  277.80   16.55
   3   4   9  264.78   17.50
  -3  -4 -10  143.30   12.88
  -3  -4 -10  196.24   14.51
   3   4  10  215.47   17.00
   3   4  11  356.33   22.30
   3   4  11  294.80   20.47
   3   4  12  139.41   16.81
  -3  -5   0  665.18   12.08
  -3  -5   0  619.43   21.99
   3   5   0  721.55   20.76
  -3  -5  -1  679.89   12.00
  -3  -5  -1  706.39   23.93
   3   5   1  762.89   21.61
  -3  -5  -2  472.97    9.93
  -3  -5  -2  500.99   20.53
   3   5   2  528.35   18.75
  -3  -5  -3  425.03    9.93
  -3  -5  -3  409.95   18.51
   3   5   3  476.73   18.58
  -3  -5  -4  144.06    6.62
  -3  -5  -4  148.86   12.28
   3   5   4  155.32   12.51
  -3  -5  -5  324.58   10.60
  -3  -5  -5  397.10   19.22
   3   5   5  412.05   18.71
  -3  -5  -6  282.86   11.02
  -3  -5  -6  371.78   19.00
   3   5   6  408.81   19.59
  -3  -5  -7  444.09   20.93
   3   5   7  516.10   22.68
  -3  -5  -8  274.38   17.40
   3   5   8  289.64   18.72
  -3  -5  -9  187.58   14.98
   3   5   9  194.45   16.88
  -3  -5 -10  307.09   18.14
   3   5  10  342.67   21.73
   3   5  11  164.21   17.90
  -3  -6   0   39.11    8.07
   3   6   0   49.85    8.09
  -3  -6  -1  317.83   17.82
   3   6   1  333.16   16.07
  -3  -6  -2  687.37   25.06
   3   6   2  733.43   23.41
  -3  -6  -3  837.57   27.67
   3   6   3  894.87   26.67
  -3  -6  -4  627.41   24.33
   3   6   4  640.66   23.14
  -3  -6  -5  244.92   16.39
   3   6   5  303.95   17.61
  -3  -6  -6  186.27   15.10
   3   6   6  201.04   15.98
  -3  -6  -7  184.11   15.16
   3   6   7  209.65   16.91
   3   6   7  211.30   14.19
  -3  -6  -8  240.93   17.33
   3   6   8  263.53   19.18
  -3  -6  -9  240.10   17.31
   3   6   9  217.47   18.91
  -3  -6 -10  209.25   16.54
   3   6  10  189.89   18.69
  -3  -7   0  195.44   15.66
   3   7   0  221.48   14.91
  -3  -7  -1  290.97   18.22
   3   7   1  325.86   17.28
  -3  -7  -2  264.70   17.66
   3   7   2  301.68   17.13
  -3  -7  -3  364.12   20.01
   3   7   3  383.55   19.35
  -3  -7  -4  554.38   24.26
   3   7   4  615.64   24.25
  -3  -7  -5  462.73   22.52
   3   7   5  503.17   23.07
  -3  -7  -6  215.45   16.76
   3   7   6  243.08   18.53
  -3  -7  -7  236.43   17.58
   3   7   7  241.34   19.25
   3   7   7  231.01   15.74
  -3  -7  -8  145.26   14.95
   3   7   8  166.72   17.47
  -3  -7  -9  304.09   19.67
   3   7   9  304.00   22.98
  -3  -8   0  543.81   25.15
   3   8   0  605.44   23.82
  -3  -8  -1  685.76   27.92
   3   8   1  789.87   27.30
  -3  -8  -2  484.95   23.87
   3   8   2  557.79   23.73
  -3  -8  -3  167.29   15.80
   3   8   3  203.95   16.30
  -3  -8  -4  128.88   14.18
   3   8   4  155.31   15.57
  -3  -8  -5   97.00   13.57
   3   8   5  105.92   14.14
  -3  -8  -6  254.35   18.76
   3   8   6  256.23   19.45
  -3  -8  -7  196.71   17.09
   3   8   7  205.63   19.72
   3   8   7  224.79   17.03
  -3  -8  -8  269.18   20.14
   3   8   8  312.19   22.82
  -3  -9   0  237.83   18.35
   3   9   0  242.78   18.03
  -3  -9  -1  265.89   19.85
   3   9   1  301.11   19.44
  -3  -9  -2  281.03   20.30
   3   9   2  319.10   20.20
  -3  -9  -3  273.93   20.00
   3   9   3  296.74   20.03
  -3  -9  -4  209.12   18.08
   3   9   4  246.81   19.03
  -3  -9  -5  123.71   16.51
   3   9   5  133.23   16.77
  -3  -9  -6  140.92   16.08
   3   9   6  170.68   18.00
  -3 -10   0  160.16   17.78
   3  10   0  176.58   17.75
  -3 -10  -1  246.44   20.49
   3  10   1  243.01   19.46
  -3 -10  -2  192.60   18.87
   3  10   2  239.88   19.61
  -3 -10  -3  285.17   21.57
   3  10   3  276.15   21.41
  -3 -10  -4   79.79   14.37
   3  10   4   83.75   14.61
  -3 -10  -5  115.70   16.95
   3  10   5  126.96   17.24
  -3 -11   0  152.46   20.12
   3  11   0  161.18   17.93
  -3 -11  -1   97.71   16.45
   3  11   1  102.21   15.39
  -3 -11  -2  182.70   19.86
   3  11   2  169.54   18.87
   4 -13   1  119.35   18.70
  -4  13  -2  162.44   16.23
   4 -13   2  140.18   19.79
  -4  13  -3   93.68   13.18
   4 -13   3   96.16   18.15
  -4  12  -1  101.95   12.64
   4 -12   1  102.78   17.83
  -4  12  -2  116.41   13.76
   4 -12   2  115.29   18.19
  -4  12  -3  115.09   14.20
   4 -12   3  107.13   17.77
  -4  12  -4  108.76   14.81
   4 -12   4  108.29   18.77
  -4  12  -5  209.01   18.73
   4 -12   5  169.74   19.01
  -4  12  -6  106.36   15.64
   4 -12   6  115.05   18.71
  -4  12  -7   75.38   14.33
  -4  11  -1  122.23   13.14
   4 -11   1  134.58   18.51
  -4  11  -2   98.88   13.01
   4 -11   2  123.27   17.87
  -4  11  -3  135.49   14.68
   4 -11   3  121.43   17.45
  -4  11  -4  308.72   20.46
   4 -11   4  278.07   22.42
  -4  11  -5  241.41   19.59
   4 -11   5  201.77   20.17
  -4  11  -6  223.83   19.62
   4 -11   6  184.49   19.80
  -4  11  -7  125.19   16.61
   4 -11   7  135.29   19.53
  -4  11  -8  124.29   17.64
   4 -11   8  131.41   19.84
  -4  10  -1  110.72   12.83
   4 -10   1   92.86   14.31
  -4  10  -2  211.78   16.24
   4 -10   2  196.71   18.50
  -4  10  -3  482.35   22.92
   4 -10   3  452.11   25.40
  -4  10  -4  525.29   24.72
   4 -10   4  483.19   26.36
  -4  10  -5  238.26   19.25
   4 -10   5  216.26   19.62
  -4  10  -6  182.91   18.09
   4 -10   6  185.05   18.90
  -4  10  -7  141.36   17.30
   4 -10   7  153.68   17.89
  -4  10  -8  140.29   17.40
   4 -10   8  174.06   18.83
  -4  10  -9  187.43   18.32
   4 -10   9  225.91   20.62
  -4  10 -10   63.11   13.06
   4 -10  10   69.48   15.03
  -4   9  -1  404.35   19.30
   4  -9   1  388.41   22.27
  -4   9  -2  447.70   20.98
   4  -9   2  412.60   23.08
  -4   9  -3  874.61   29.59
   4  -9   3  781.13   30.11
  -4   9  -4  133.85   15.70
   4  -9   4  128.07   14.55
  -4   9  -5  225.84   17.85
   4  -9   5  216.35   18.55
  -4   9  -6  227.54   18.33
   4  -9   6  200.73   17.40
  -4   9  -7  160.24   16.57
   4  -9   7  173.61   17.66
  -4   9  -8  173.73   16.89
   4  -9   8  195.87   18.45
  -4   9  -9  107.45   15.74
   4  -9   9   96.98   15.04
  -4   9 -10  123.48   16.30
   4  -9  10  166.28   17.81
  -4   9 -11  138.15   18.49
   4  -9  11  168.43   17.79
  -4   8  -1   50.60    9.25
   4  -8   1   59.70   11.14
  -4   8  -2  765.84   26.20
   4  -8   2  669.59   26.84
  -4   8  -3  629.53   24.96
   4  -8   3  537.38   24.03
  -4   8  -4  351.11   20.67
   4  -8   4  284.91   19.03
  -4   8  -5  229.15   17.59
   4  -8   5  211.07   16.47
  -4   8  -6  278.63   19.13
   4  -8   6  294.44   19.84
  -4   8  -7  175.88   16.90
   4  -8   7  197.51   17.36
  -4   8  -8   99.32   13.80
   4  -8   8  102.79   14.57
  -4   8  -9   78.91   12.70
   4  -8   9  130.04   16.86
  -4   8 -10  141.40   16.52
   4  -8  10  167.75   17.05
  -4   8 -11  174.24   18.23
   4  -8  11  187.98   17.38
  -4   7  -1   35.92    8.14
  -4   7  -1   33.24    5.56
   4  -7   1   22.71    7.64
  -4   7  -2  199.73   14.56
   4  -7   2  170.39   14.59
  -4   7  -3  142.51   13.85
   4  -7   3  133.68   12.90
  -4   7  -4  501.27   22.83
   4  -7   4  394.85   20.64
  -4   7  -5  470.47   23.12
   4  -7   5  393.92   20.89
  -4   7  -6  428.14   22.11
   4  -7   6  392.63   21.18
  -4   7  -7  218.02   17.11
   4  -7   7  229.85   17.28
  -4   7  -8   82.79   12.47
   4  -7   8  100.38   13.99
  -4   7  -9  231.05   18.16
   4  -7   9  265.70   18.56
  -4   7 -10  138.37   16.06
   4  -7  10  171.43   15.96
  -4   7 -11  159.36   17.92
   4  -7  11  208.16   17.53
  -4   7 -12   61.19   13.90
   4  -7  12   77.98   12.95
  -4   6  -1  581.34   20.81
   4  -6   1  529.88   21.25
  -4   6  -2  180.36   13.76
   4  -6   2  159.73   13.18
  -4   6  -3  506.91   21.68
   4  -6   3  492.26   21.50
  -4   6  -4  291.27   17.85
   4  -6   4  252.97   16.11
  -4   6  -5  401.09   20.76
   4  -6   5  389.98   20.17
  -4   6  -6  364.03   20.27
   4  -6   6  351.74   19.57
  -4   6  -7  114.17   13.58
   4  -6   7  132.72   13.72
  -4   6  -8  212.14   17.13
   4  -6   8  240.11   17.11
  -4   6  -9  261.67   18.98
   4  -6   9  297.85   18.64
  -4   6 -10  403.26   23.41
   4  -6  10  437.57   22.36
  -4   6 -11  309.24   22.12
   4  -6  11  362.49   20.88
  -4   6 -12  186.72   20.59
   4  -6  12  200.69   16.56
  -4   5  -1  358.50   15.83
   4  -5   1  378.55   17.81
  -4   5  -2  441.07   18.73
   4  -5   2  382.07   17.77
  -4   5  -3  471.18   20.38
   4  -5   3  446.20   19.75
  -4   5  -4  415.38   20.05
   4  -5   4  388.11   18.99
  -4   5  -5  521.08   22.68
   4  -5   5  516.90   12.54
   4  -5   5  503.38   21.67
  -4   5  -6  489.25   22.50
   4  -5   6  498.07   13.97
   4  -5   6  487.86   21.70
  -4   5  -7  312.11   18.98
   4  -5   7  312.49   12.61
   4  -5   7  327.33   18.52
  -4   5  -8  312.15   19.57
   4  -5   8  358.97   15.75
   4  -5   8  358.81   19.42
  -4   5  -9  219.29   17.49
   4  -5   9  220.79   16.55
  -4   5 -10  367.73   22.61
   4  -5  10  455.09   22.05
  -4   5 -11  342.08   23.09
   4  -5  11  374.92   20.08
  -4   5 -12  239.90   21.93
   4  -5  12  282.27   17.81
  -4   4  -1  322.07   14.92
   4  -4   1  337.21   16.32
  -4   4  -2  870.33   24.62
   4  -4   2  804.49   24.35
  -4   4  -3  800.28   25.00
   4  -4   3  718.72   23.85
  -4   4  -4  689.04   24.41
   4  -4   4  603.40   22.53
  -4   4  -5  631.67   23.91
   4  -4   5  636.90   13.76
   4  -4   5  612.93   23.20
  -4   4  -6  366.89   19.69
   4  -4   6  350.21   11.66
   4  -4   6  350.33   18.36
  -4   4  -7  483.86   22.71
   4  -4   7  491.25   15.34
   4  -4   7  485.58   21.39
  -4   4  -8  286.21   18.94
   4  -4   8  294.37   13.32
   4  -4   8  310.06   17.96
  -4   4  -9  221.69   17.77
   4  -4   9  242.70   13.34
   4  -4   9  277.67   17.54
  -4   4 -10  200.55   18.04
   4  -4  10  233.90   14.08
   4  -4  10  222.46   15.69
  -4   4 -11  337.01   23.10
   4  -4  11  365.50   22.95
   4  -4  11  395.68   19.97
  -4   4 -12  112.25   17.89
   4  -4  12  120.56   12.36
  -4   4 -13  106.03   17.99
  -4   3  -1  307.53   13.93
   4  -3   1  336.79   15.86
  -4   3  -2  557.81   19.28
   4  -3   2  567.90   20.10
  -4   3  -3  887.94   25.39
   4  -3   3  852.70   25.32
  -4   3  -4 1337.01   32.69
   4  -3   4 1183.77   17.67
   4  -3   4 1221.13   31.01
  -4   3  -5  861.41   27.42
   4  -3   5  756.53   15.71
   4  -3   5  800.49   25.86
  -4   3  -6  473.69   21.62
   4  -3   6  437.13   13.35
   4  -3   6  454.31   19.90
  -4   3  -7  366.09   19.93
   4  -3   7  325.96   12.90
   4  -3   7  355.30   18.42
  -4   3  -8  223.30   17.10
   4  -3   8  234.01   12.36
   4  -3   8  241.66   15.96
  -4   3  -9  120.33   14.59
   4  -3   9  110.11   10.27
   4  -3   9  119.91   12.81
  -4   3 -10   93.72   14.85
   4  -3  10  101.52   10.94
   4  -3  10  102.44   12.28
  -4   3 -11  149.05   18.46
   4  -3  11  140.09   13.14
   4  -3  11  177.16   14.26
  -4   3 -12  138.91   20.00
   4  -3  12  123.93   13.58
   4  -3  12   94.83   11.27
  -4   3 -13  227.97   23.85
  -4   2  -1 1023.39   23.66
   4  -2   1 1071.84   26.53
  -4   2  -2  797.20   21.96
   4  -2   2  791.81   23.16
  -4   2  -3  284.39   14.69
   4  -2   3  258.36    6.77
   4  -2   3  260.98   14.30
  -4   2  -4  433.85   18.67
   4  -2   4  396.89   10.18
   4  -2   4  461.17   19.28
  -4   2  -5  610.23   23.08
   4  -2   5  518.51   13.37
   4  -2   5  574.45   21.74
  -4   2  -6  487.64   21.41
   4  -2   6  504.43   14.90
   4  -2   6  513.44   21.11
  -4   2  -7  353.06   19.43
   4  -2   7  345.77   13.95
   4  -2   7  361.45   18.41
  -4   2  -8  207.61   16.41
   4  -2   8  218.75   12.57
   4  -2   8  219.86   15.60
  -4   2  -9  179.33   16.22
   4  -2   9  186.59   12.99
   4  -2   9  219.13   15.66
  -4   2 -10  287.16   20.45
   4  -2  10  306.34   16.84
   4  -2  10  296.80   17.55
  -4   2 -11  193.40   18.98
   4  -2  11  210.34   15.39
   4  -2  11  194.67   14.77
  -4   2 -12  125.12   18.58
   4  -2  12  152.84   15.04
   4  -2  12  115.32   11.39
  -4   2 -13   79.67   16.85
   4  -2  13   85.23   13.08
  -4   1  -1 1128.25   24.18
   4  -1   1 1185.48   16.39
   4  -1   1 1160.72   27.31
  -4   1  -2  441.64   16.08
   4  -1   2  480.37   10.32
   4  -1   2  452.57   17.66
  -4   1  -3  357.01   15.42
   4  -1   3  349.20    9.91
   4  -1   3  322.23   15.87
  -4   1  -4  399.71   17.31
   4  -1   4  388.31   11.64
   4  -1   4  416.06   18.24
  -4   1  -5  591.07   21.73
   4  -1   5  545.11   15.24
   4  -1   5  573.53   21.61
  -4   1  -6  468.58   20.47
   4  -1   6  450.39   15.24
   4  -1   6  470.63   20.13
  -4   1  -7  204.53   15.65
   4  -1   7  208.27   11.83
   4  -1   7  198.15   14.30
  -4   1  -8  392.09   20.63
   4  -1   8  381.72   16.48
   4  -1   8  389.31   19.15
  -4   1  -9  211.39   17.44
   4  -1   9  242.17   14.82
   4  -1   9  223.30   15.66
  -4   1 -10  295.34   20.58
   4  -1  10  315.21   17.43
   4  -1  10  331.92   17.96
  -4   1 -11  428.28   25.00
   4  -1  11  455.38   21.60
   4  -1  11  460.04   21.08
  -4   1 -12  192.16   20.52
   4  -1  12  247.53   17.93
   4  -1  12  165.56   14.59
  -4   0   0  740.58   18.71
   4   0   0  816.50   13.89
   4   0   0  787.95   22.66
  -4   0  -1  499.45   15.74
   4   0   1  546.44   11.69
   4   0   1  562.73   19.64
  -4   0  -2  355.85   13.94
   4   0   2  360.07   10.05
   4   0   2  397.16   17.08
  -4   0  -3  349.10   14.70
   4   0   3  333.18   10.62
   4   0   3  359.03   16.75
  -4   0  -4  920.51   24.60
   4   0   4  943.73   20.09
   4   0   4  993.79   27.56
  -4   0  -5  914.20   25.96
   4   0   5  911.52   21.22
   4   0   5  945.08   27.51
  -4   0  -6  201.26   14.18
   4   0   6  189.88   11.14
   4   0   6  212.31   14.35
  -4   0  -7  178.30   14.40
   4   0   7  184.79   11.81
   4   0   7  223.54   14.96
  -4   0  -8  555.78   23.45
   4   0   8  513.76   19.55
   4   0   8  531.42   21.95
  -4   0  -9  420.07   21.95
   4   0   9  431.44   19.22
   4   0   9  465.00   20.75
  -4   0 -10  217.73   17.79
   4   0  10  252.06   16.30
   4   0  10  268.48   16.29
  -4   0 -11  246.14   19.61
   4   0  11  248.64   17.29
   4   0  11  252.69   16.26
  -4   0 -12  157.26   18.49
   4   0  12  199.31   16.58
  -4  -1   0  665.28   17.34
  -4  -1   0  668.24   21.24
   4   1   0  753.59   15.45
  -4  -1  -1  683.66   17.67
  -4  -1  -1  718.39   22.66
   4   1   1  783.69   16.17
  -4  -1  -2  748.61   19.20
  -4  -1  -2  765.02   23.80
   4   1   2  812.46   17.23
  -4  -1  -3  456.58   15.76
  -4  -1  -3  492.19   19.83
   4   1   3  488.64   14.02
  -4  -1  -4  460.87   16.79
  -4  -1  -4  450.28   19.43
   4   1   4  469.42   14.75
  -4  -1  -5  589.99   20.11
   4   1   5  585.41   17.69
   4   1   5  649.67   23.29
  -4  -1  -6   56.94    9.14
   4   1   6   48.57    7.38
   4   1   6   59.34    9.75
  -4  -1  -7  577.56   22.00
   4   1   7  580.26   19.96
   4   1   7  622.51   23.48
  -4  -1  -8  476.53   21.32
   4   1   8  473.71   19.24
   4   1   8  517.09   21.86
  -4  -1  -9  326.74   19.04
   4   1   9  296.58   16.61
   4   1   9  339.59   18.22
  -4  -1 -10  218.08   16.73
   4   1  10  218.45   15.51
   4   1  10  204.14   14.98
  -4  -1 -11  154.97   16.67
   4   1  11  167.27   14.76
   4   1  11  203.56   15.19
  -4  -1 -12  339.10   22.44
   4   1  12  369.27   21.20
  -4  -2   0  180.17    9.32
  -4  -2   0  203.44   12.96
   4   2   0  204.05    9.69
  -4  -2  -1  852.56   19.13
  -4  -2  -1  920.73   26.18
   4   2   1 1000.23   20.35
  -4  -2  -2  897.03   20.36
  -4  -2  -2  971.86   27.58
   4   2   2 1043.04   21.55
  -4  -2  -3  554.44   16.55
  -4  -2  -3  571.36   21.48
   4   2   3  633.62   17.49
  -4  -2  -4  645.51   18.75
  -4  -2  -4  695.91   24.42
   4   2   4  703.64   19.47
  -4  -2  -5   63.06    8.36
  -4  -2  -5   56.11    9.41
   4   2   5   53.16    7.49
  -4  -2  -6  188.96   12.26
  -4  -2  -6  175.22   14.26
   4   2   6  196.76   12.35
  -4  -2  -7  309.75   15.95
  -4  -2  -7  308.98   17.65
   4   2   7  322.96   16.04
  -4  -2  -8  565.08   22.03
   4   2   8  572.25   21.84
   4   2   8  602.97   23.88
  -4  -2  -9  263.18   16.63
   4   2   9  261.35   16.32
   4   2   9  281.92   17.06
  -4  -2 -10  173.24   15.26
   4   2  10  154.79   14.18
   4   2  10  196.79   14.69
  -4  -2 -11  200.55   16.93
   4   2  11  225.65   17.17
   4   2  11  249.81   16.11
  -4  -3   0  252.59   10.29
  -4  -3   0  249.52   15.24
   4   3   0  278.87   12.21
  -4  -3  -1  248.83   10.26
  -4  -3  -1  231.17   15.09
   4   3   1  267.63   12.31
  -4  -3  -2  263.98   10.76
  -4  -3  -2  282.16   16.58
   4   3   2  326.25   13.77
  -4  -3  -3  365.05   13.01
  -4  -3  -3  385.94   19.11
   4   3   3  417.98   15.87
  -4  -3  -4  642.68   17.97
  -4  -3  -4  687.78   25.06
   4   3   4  753.30   21.68
  -4  -3  -5  335.46   13.91
  -4  -3  -5  348.58   18.90
   4   3   5  363.06   16.26
  -4  -3  -6  438.91   16.67
  -4  -3  -6  469.72   21.58
   4   3   6  456.67   18.90
  -4  -3  -7  224.70   13.11
  -4  -3  -7  228.42   16.16
   4   3   7  239.81   15.27
  -4  -3  -8  240.37   14.35
  -4  -3  -8  213.72   15.85
   4   3   8  225.90   15.48
  -4  -3  -9  171.47   13.08
   4   3   9  183.56   14.97
   4   3   9  195.66   15.64
  -4  -3 -10  137.16   12.45
   4   3  10  176.72   15.65
   4   3  10  197.09   15.53
   4   3  11  274.34   19.34
   4   3  11  245.01   16.36
  -4  -4   0  166.28    8.13
  -4  -4   0  162.80   13.90
   4   4   0  199.15   11.91
  -4  -4  -1  240.25    9.54
  -4  -4  -1  247.76   16.26
   4   4   1  286.70   13.77
  -4  -4  -2  242.94    9.74
  -4  -4  -2  264.65   16.97
   4   4   2  287.21   14.38
  -4  -4  -3  819.08   18.16
  -4  -4  -3  832.05   27.84
   4   4   3  941.81   24.93
  -4  -4  -4  294.00   11.70
  -4  -4  -4  339.87   19.15
   4   4   4  350.40   16.62
  -4  -4  -5  697.95   18.85
  -4  -4  -5  773.85   27.97
   4   4   5  853.00   25.86
  -4  -4  -6  102.97    8.15
  -4  -4  -6  146.23   14.43
   4   4   6  142.03   13.02
  -4  -4  -7  169.58   10.81
  -4  -4  -7  216.33   16.31
   4   4   7  241.54   16.34
  -4  -4  -8  173.45   15.70
   4   4   8  199.28   16.00
  -4  -4  -9  158.50   14.84
   4   4   9  167.95   15.43
   4   4  10  306.62   20.32
   4   4  10  298.40   18.69
  -4  -5   0  147.13    7.39
  -4  -5   0  141.85   13.18
   4   5   0  159.54   12.28
  -4  -5  -1  225.19    8.53
  -4  -5  -1  268.02   17.74
   4   5   1  275.31   15.07
  -4  -5  -2  467.75   13.59
  -4  -5  -2  582.57   24.60
   4   5   2  654.07   22.08
  -4  -5  -3  323.14   19.36
   4   5   3  336.04   16.81
  -4  -5  -4  489.78   23.41
   4   5   4  523.43   21.28
  -4  -5  -5  403.62   21.56
   4   5   5  394.43   19.35
  -4  -5  -6  333.64   20.22
   4   5   6  374.39   19.72
   4   5   6  337.49   15.19
  -4  -5  -7  211.96   17.12
   4   5   7  238.04   17.60
  -4  -5  -8  116.93   14.13
   4   5   8  141.08   15.64
  -4  -5  -9  174.66   16.64
   4   5   9  186.48   17.21
  -4  -6   0  308.68   19.36
   4   6   0  338.67   17.13
  -4  -6  -1  439.99   22.63
   4   6   1  485.95   20.52
  -4  -6  -2  700.11   28.04
   4   6   2  769.45   25.58
  -4  -6  -3  218.79   17.49
   4   6   3  229.99   15.69
  -4  -6  -4  268.26   18.94
   4   6   4  291.95   18.01
  -4  -6  -5   74.92   12.52
   4   6   5   73.64   11.54
  -4  -6  -6  187.57   16.84
   4   6   6  186.11   16.68
   4   6   6  183.37   13.89
  -4  -6  -7  320.53   21.04
   4   6   7  359.74   22.07
  -4  -6  -8  217.25   18.23
   4   6   8  242.56   19.91
  -4  -7   0  198.20   17.19
   4   7   0  195.33   15.06
  -4  -7  -1  307.52   20.29
   4   7   1  347.73   19.29
  -4  -7  -2  138.02   15.28
   4   7   2  153.75   14.32
  -4  -7  -3  545.34   26.30
   4   7   3  615.69   25.05
  -4  -7  -4  370.60   22.44
   4   7   4  376.21   20.83
  -4  -7  -5  225.63   18.58
   4   7   5  231.77   18.44
  -4  -7  -6   93.07   14.38
   4   7   6   90.20   13.69
  -4  -7  -7   50.89   11.96
   4   7   7   31.12   10.52
  -4  -8   0  242.72   18.89
   4   8   0  219.57   17.25
  -4  -8  -1  172.19   17.31
   4   8   1  205.65   16.70
  -4  -8  -2  173.11   16.68
   4   8   2  204.72   17.54
  -4  -8  -3  187.11   17.97
   4   8   3  238.81   18.32
  -4  -8  -4  130.47   16.15
   4   8   4  162.11   16.44
  -4  -8  -5  133.44   17.22
   4   8   5  139.11   16.18
  -4  -8  -6  166.82   17.80
   4   8   6  228.25   19.70
  -4  -9   0  193.88   19.15
   4   9   0  225.24   18.17
  -4  -9  -1  111.84   15.91
   4   9   1  121.84   15.18
  -4  -9  -2  181.63   18.65
   4   9   2  207.63   18.83
  -4  -9  -3  111.18   16.44
   4   9   3  170.78   18.01
  -4  -9  -4   98.02   15.82
   4   9   4   92.03   14.85
  -4 -10   0  139.39   19.40
   4  10   0  156.24   18.24
  -4 -10  -1  156.31   18.78
   4  10   1  159.48   17.73
  -5  12  -1  140.95   16.06
   5 -12   1  131.51   19.17
  -5  12  -2   91.34   14.65
   5 -12   2   91.17   16.90
  -5  12  -3  254.18   20.31
   5 -12   3  261.54   23.86
  -5  11  -1   95.46   13.92
   5 -11   1   95.45   16.23
  -5  11  -2  110.89   15.41
   5 -11   2  104.56   16.17
  -5  11  -3  319.70   22.53
   5 -11   3  267.49   23.01
  -5  11  -4  277.59   21.82
   5 -11   4  275.12   23.18
  -5  11  -5  127.16   18.23
   5 -11   5  107.20   17.81
  -5  11  -6  106.94   17.61
   5 -11   6  123.51   19.15
  -5  10  -1   84.13   13.20
   5 -10   1   74.22   14.14
  -5  10  -2   91.13   14.23
   5 -10   2   62.12   13.34
  -5  10  -3  259.40   20.44
   5 -10   3  206.73   19.10
  -5  10  -4  275.28   21.41
   5 -10   4  230.05   20.82
  -5  10  -5  150.83   18.30
   5 -10   5  105.68   16.36
  -5  10  -6  201.04   20.42
   5 -10   6  173.49   19.63
  -5  10  -7   87.61   15.65
   5 -10   7  100.00   16.28
  -5  10  -8   93.10   16.65
   5 -10   8   92.24   17.13
  -5   9  -1  113.18   14.42
   5  -9   1  114.08   15.84
  -5   9  -2   59.07   11.96
   5  -9   2   42.46   10.66
  -5   9  -3   67.11   12.68
   5  -9   3   44.58   11.30
  -5   9  -4  135.83   18.01
   5  -9   4  126.73   17.48
  -5   9  -5  297.09   22.29
   5  -9   5  250.55   20.50
  -5   9  -6  360.08   24.26
   5  -9   6  353.09   23.89
  -5   9  -7  185.37   19.94
   5  -9   7  197.90   19.66
  -5   9  -8   70.63   14.43
   5  -9   8   74.48   14.58
  -5   9  -9   44.01   12.28
   5  -9   9   59.87   13.47
  -5   8  -1  288.68   18.69
   5  -8   1  264.54   19.49
  -5   8  -2  379.93   21.92
   5  -8   2  304.86   19.89
  -5   8  -3  221.19   18.86
   5  -8   3  193.31   17.55
  -5   8  -4  121.78   16.52
   5  -8   4  121.06   16.17
  -5   8  -5  107.96   15.78
   5  -8   5   91.41   14.10
  -5   8  -6  194.83   19.17
   5  -8   6  148.72   17.08
  -5   8  -7  261.49   20.74
   5  -8   7  236.53   20.03
  -5   8  -8  140.24   17.04
   5  -8   8  174.19   18.22
  -5   8  -9  142.97   17.19
   5  -8   9  156.69   17.88
  -5   8 -10  164.40   17.90
   5  -8  10  175.61   18.53
  -5   7  -1  317.38   18.92
  -5   7  -1  266.88   11.96
   5  -7   1  314.79   19.21
  -5   7  -2  132.04   14.88
   5  -7   2  117.38   14.45
  -5   7  -3  459.01   24.13
   5  -7   3  376.52   21.89
  -5   7  -4  428.54   24.42
   5  -7   4  389.48   22.50
  -5   7  -5  304.64   21.74
   5  -7   5  268.58   18.92
  -5   7  -6  296.35   21.91
   5  -7   6  235.83   18.17
  -5   7  -7  140.96   16.75
   5  -7   7  149.77   16.40
  -5   7  -8  187.35   18.04
   5  -7   8  172.22   17.44
  -5   7  -9  135.22   16.55
   5  -7   9  164.14   17.65
  -5   7 -10  115.12   16.43
   5  -7  10  186.58   18.49
  -5   6  -1  230.21   16.33
   5  -6   1  247.16   17.47
  -5   6  -2  270.19   18.30
   5  -6   2  218.30   16.83
  -5   6  -3  319.73   20.51
   5  -6   3  247.53   17.30
  -5   6  -4  430.15   23.76
   5  -6   4  333.64   19.84
  -5   6  -5  524.52   26.20
   5  -6   5  463.97   23.82
  -5   6  -6  430.79   24.15
   5  -6   6  393.61   22.02
  -5   6  -7  247.18   19.43
   5  -6   7  242.03   18.83
  -5   6  -8  215.03   18.48
   5  -6   8  235.42   18.64
  -5   6  -9  101.48   15.05
   5  -6   9  151.65   16.62
  -5   6 -10   73.56   13.77
   5  -6  10  110.32   15.51
  -5   6 -11   85.50   14.83
   5  -6  11  111.94   15.57
  -5   5  -1  133.13   13.21
   5  -5   1  123.35   13.50
  -5   5  -2  492.94   22.47
   5  -5   2  411.94   20.60
  -5   5  -3  443.46   22.67
   5  -5   3  363.63   20.44
  -5   5  -4  382.40   21.91
   5  -5   4  373.08   20.41
  -5   5  -5  538.36   25.78
   5  -5   5  510.67   24.33
  -5   5  -6  323.43   21.23
   5  -5   6  286.52   19.50
  -5   5  -7  305.16   20.68
   5  -5   7  295.55   19.96
  -5   5  -8  101.09   14.42
   5  -5   8  158.53   16.08
  -5   5  -9  104.55   15.46
   5  -5   9   88.48   13.71
  -5   5 -10   68.07   13.93
   5  -5  10   68.07   12.66
  -5   5 -11  155.39   17.63
   5  -5  11  161.79   16.19
  -5   4  -1  677.31   23.83
   5  -4   1  696.94   25.63
  -5   4  -2  592.88   23.65
   5  -4   2  539.03   23.35
  -5   4  -3  295.27   18.67
   5  -4   3  257.73   16.99
  -5   4  -4  188.97   16.51
   5  -4   4  155.13   14.98
  -5   4  -5  194.76   16.70
   5  -4   5  175.13   15.98
  -5   4  -6  476.49   24.05
   5  -4   6  454.29   23.24
  -5   4  -7  344.32   21.77
   5  -4   7  339.32   20.84
  -5   4  -8  234.54   18.56
   5  -4   8  239.03   18.34
  -5   4  -9   82.93   13.21
   5  -4   9  103.00   14.80
  -5   4 -10   77.75   13.93
   5  -4  10  111.29   15.31
  -5   4 -11  145.79   17.22
   5  -4  11  151.82   16.11
  -5   3  -1  448.13   19.13
   5  -3   1  501.84   21.70
  -5   3  -2  573.50   22.49
   5  -3   2  493.49   21.96
  -5   3  -3  307.07   18.21
   5  -3   3  287.39   18.01
  -5   3  -4  242.52   17.41
   5  -3   4  226.88   16.88
  -5   3  -5  359.90   20.69
   5  -3   5  336.01   20.00
  -5   3  -6  399.70   21.99
   5  -3   6  391.04   21.65
  -5   3  -7  130.63   14.94
   5  -3   7  145.50   15.14
  -5   3  -8  260.15   18.91
   5  -3   8  279.98   19.13
  -5   3  -9  208.43   17.98
   5  -3   9  237.12   18.30
  -5   3 -10  255.34   19.93
   5  -3  10  321.08   20.40
  -5   3 -11  141.18   18.49
   5  -3  11  173.78   16.58
  -5   2  -1  358.71   16.71
   5  -2   1  329.77   17.46
  -5   2  -2  410.75   18.69
   5  -2   2  406.45   20.03
  -5   2  -3  354.04   18.44
   5  -2   3  334.77   18.97
  -5   2  -4  355.18   19.36
   5  -2   4  336.54   19.27
  -5   2  -5  935.15   30.92
   5  -2   5  885.98   30.29
  -5   2  -6  282.00   18.63
   5  -2   6  308.17   19.25
  -5   2  -7  119.46   14.07
   5  -2   7  116.67   13.98
  -5   2  -8  132.98   14.82
   5  -2   8  152.73   15.31
  -5   2  -9  391.82   22.53
   5  -2   9  478.25   24.14
  -5   2 -10  169.65   17.57
   5  -2  10  185.57   16.52
  -5   2 -11  164.56   17.80
   5  -2  11  209.11   17.48
  -5   1  -1  291.88   14.79
   5  -1   1  312.00    7.95
   5  -1   1  314.90   17.11
  -5   1  -2  583.97   21.01
   5  -1   2  625.44   15.03
   5  -1   2  620.64   23.88
  -5   1  -3  455.57   19.90
   5  -1   3  452.26   21.20
  -5   1  -4  478.36   20.97
   5  -1   4  473.11   22.04
  -5   1  -5  428.17   20.63
   5  -1   5  432.01   21.20
  -5   1  -6  154.43   14.84
   5  -1   6  180.46   15.69
  -5   1  -7  137.00   14.57
   5  -1   7  139.73   14.70
  -5   1  -8  316.15   19.61
   5  -1   8  361.37   21.30
  -5   1  -9  353.37   21.47
   5  -1   9  379.59   21.60
  -5   1 -10  116.26   15.66
   5  -1  10  130.58   14.55
  -5   1 -11  164.03   17.27
   5  -1  11  175.41   16.47
  -5   0   0  448.09   16.85
   5   0   0  496.95   11.78
   5   0   0  478.41   20.88
  -5   0  -1  414.45   16.58
   5   0   1  431.97   11.28
   5   0   1  427.74   20.16
  -5   0  -2  476.97   18.59
   5   0   2  493.22   12.76
   5   0   2  487.38   21.10
  -5   0  -3  283.76   15.59
   5   0   3  299.26   10.94
   5   0   3  310.57   18.19
  -5   0  -4  395.21   18.40
   5   0   4  421.31   13.90
   5   0   4  439.36   21.48
  -5   0  -5  323.52   17.79
   5   0   5  293.31   12.71
   5   0   5  316.04   19.12
  -5   0  -6  142.29   13.13
   5   0   6  151.19   10.57
   5   0   6  131.32   14.24
  -5   0  -7  127.83   13.69
   5   0   7  137.92   11.01
   5   0   7  136.54   14.26
  -5   0  -8  397.64   20.97
   5   0   8  429.62   24.86
   5   0   8  434.18   22.50
  -5   0  -9  205.03   16.70
   5   0   9  205.97   17.50
  -5   0 -10  181.25   16.72
   5   0  10  235.86   17.71
  -5   0 -11  105.87   15.36
   5   0  11  111.59   13.72
  -5  -1   0  133.13   10.16
  -5  -1   0  122.73   12.06
   5   1   0  135.97    8.06
  -5  -1  -1  219.03   12.29
   5   1   1  241.29   10.08
  -5  -1  -2  168.75   11.55
  -5  -1  -2  160.51   13.64
   5   1   2  186.47    9.37
   5   1   2  170.05   14.06
  -5  -1  -3  244.83   13.93
   5   1   3  247.99   11.04
   5   1   3  263.24   17.47
  -5  -1  -4  438.40   18.61
   5   1   4  448.61   15.38
   5   1   4  448.80   21.85
  -5  -1  -5  557.94   21.57
   5   1   5  538.05   17.87
   5   1   5  575.94   24.88
  -5  -1  -6  426.94   19.81
   5   1   6  440.65   17.27
   5   1   6  436.87   22.24
  -5  -1  -7  241.50   16.15
   5   1   7  234.48   13.90
   5   1   7  256.67   18.21
  -5  -1  -8  123.91   13.15
   5   1   8  138.09   12.18
   5   1   8  150.45   15.48
  -5  -1  -9  109.29   12.98
   5   1   9  123.59   12.43
   5   1   9  140.69   14.65
  -5  -1 -10  116.57   13.79
   5   1  10  116.45   14.45
  -5  -2   0  199.22   11.29
  -5  -2   0  202.14   15.85
   5   2   0  230.07   11.12
  -5  -2  -1   98.74    8.76
  -5  -2  -1  113.02   13.08
   5   2   1  117.28    8.98
  -5  -2  -2  206.24   11.90
  -5  -2  -2  208.03   16.22
   5   2   2  231.50   11.52
  -5  -2  -3  389.31   16.17
  -5  -2  -3  411.76   21.57
   5   2   3  413.54   15.25
  -5  -2  -4  400.17   17.21
  -5  -2  -4  378.08   20.42
   5   2   4  390.69   15.54
  -5  -2  -5  398.50   17.68
  -5  -2  -5  403.53   21.94
   5   2   5  406.76   16.75
  -5  -2  -6  328.95   16.91
   5   2   6  349.92   16.36
   5   2   6  357.55   20.94
  -5  -2  -7  276.47   16.19
   5   2   7  265.30   15.40
   5   2   7  303.37   19.56
  -5  -2  -8  151.49   13.37
   5   2   8  161.37   13.40
   5   2   8  203.02   16.87
  -5  -2  -9  162.41   14.20
   5   2   9  177.12   14.69
   5   2   9  192.63   16.96
  -5  -2 -10  102.72   12.15
   5   2  10  108.09   13.13
   5   2  10  107.03   14.62
  -5  -3   0  291.70   12.72
  -5  -3   0  313.18   19.32
   5   3   0  355.42   14.85
  -5  -3  -1  160.44   10.10
  -5  -3  -1  188.39   16.20
   5   3   1  174.68   11.48
  -5  -3  -2  332.05   13.82
  -5  -3  -2  340.88   20.46
   5   3   2  354.72   15.21
  -5  -3  -3  589.87   18.70
  -5  -3  -3  641.43   27.03
   5   3   3  651.61   20.40
  -5  -3  -4  307.46   14.48
  -5  -3  -4  309.76   20.01
   5   3   4  309.60   15.19
  -5  -3  -5  383.23   16.69
  -5  -3  -5  410.08   22.69
   5   3   5  415.42   18.11
  -5  -3  -6  153.96   11.56
  -5  -3  -6  177.47   16.76
   5   3   6  184.20   13.55
  -5  -3  -7  132.19   11.08
   5   3   7  148.56   13.47
   5   3   7  181.78   16.86
   5   3   8  197.88   15.27
   5   3   8  210.78   17.69
   5   3   9  128.07   13.71
   5   3   9  122.01   16.11
  -5  -4   0  447.57   14.94
  -5  -4   0  444.95   22.62
   5   4   0  515.50   19.04
  -5  -4  -1  244.50   11.21
  -5  -4  -1  226.55   17.26
   5   4   1  274.02   14.66
  -5  -4  -2  294.82   12.03
  -5  -4  -2  348.37   21.37
   5   4   2  408.01   17.56
  -5  -4  -3  133.83    8.86
  -5  -4  -3  167.05   16.63
   5   4   3  184.51   13.34
  -5  -4  -4  332.36   20.66
   5   4   4  356.05   17.48
  -5  -4  -5  217.74   18.24
   5   4   5  242.40   15.52
  -5  -4  -6  193.36   17.60
   5   4   6  191.76   14.86
  -5  -4  -7  161.84   16.84
   5   4   7  176.17   15.42
  -5  -4  -8  148.36   17.03
   5   4   8  159.18   15.05
  -5  -5   0  281.37   19.88
   5   5   0  319.46   16.35
  -5  -5  -1  248.14   18.47
   5   5   1  278.19   16.05
  -5  -5  -2  329.24   21.65
   5   5   2  346.23   17.89
  -5  -5  -3  188.87   17.86
   5   5   3  195.79   14.53
  -5  -5  -4  399.78   23.88
   5   5   4  445.16   20.69
  -5  -5  -5  206.48   18.66
   5   5   5  216.72   16.13
  -5  -5  -6  139.82   16.71
   5   5   6  137.51   14.51
  -5  -5  -7  107.99   16.15
   5   5   7  117.65   14.51
  -5  -6   0  107.02   15.23
   5   6   0  100.54   12.30
  -5  -6  -1  278.19   20.85
   5   6   1  290.20   17.52
  -5  -6  -2   73.82   13.49
   5   6   2   98.90   12.65
  -5  -6  -3  340.07   22.25
   5   6   3  386.78   20.42
  -5  -6  -4  119.82   17.26
   5   6   4  136.36   14.70
  -5  -6  -5  140.80   17.19
   5   6   5  146.87   15.42
  -5  -6  -6  171.72   19.03
   5   6   6  180.22   17.07
  -5  -7   0  261.92   20.29
   5   7   0  263.66   17.45
  -5  -7  -1  117.28   17.12
   5   7   1  127.11   13.96
  -5  -7  -2  145.93   17.41
   5   7   2  183.47   16.52
  -5  -7  -3  119.83   17.40
   5   7   3  149.48   15.55
  -5  -7  -4  103.96   16.16
   5   7   4  116.10   14.99
  -5  -7  -5   84.01   14.89
   5   7   5   96.47   14.48
  -5  -8   0  178.00   18.37
   5   8   0  180.19   17.05
  -5  -8  -1  109.95   17.60
   5   8   1   78.75   12.76
  -5  -8  -2  183.50   19.71
   5   8   2  196.54   17.57
  -5  -8  -3   63.27   14.46
   5   8   3   87.34   13.83
  -5  -9   0   28.47   11.14
   5   9   0   20.29    9.25
  -6  11  -1  105.67   16.30
   6 -11   1   97.54   17.57
  -6  10  -1  207.41   20.29
   6 -10   1  220.92   21.47
  -6  10  -2  120.30   18.21
   6 -10   2   89.09   16.37
  -6  10  -3  172.86   21.80
   6 -10   3  117.35   17.89
  -6  10  -4   87.49   17.15
   6 -10   4   82.13   15.93
  -6  10  -5   79.49   16.05
   6 -10   5   86.07   16.46
  -6   9  -1  243.91   20.41
   6  -9   1  204.68   19.89
  -6   9  -2  128.39   18.24
   6  -9   2  121.05   17.16
  -6   9  -3  169.03   20.74
   6  -9   3  107.43   16.31
  -6   9  -4  183.20   21.12
   6  -9   4  155.57   18.78
  -6   9  -5  303.61   25.06
   6  -9   5  257.12   22.39
  -6   9  -6  182.72   21.42
   6  -9   6  168.79   19.91
  -6   8  -1  197.54   18.71
   6  -8   1  158.85   17.83
  -6   8  -2  189.20   20.34
   6  -8   2  139.28   17.28
  -6   8  -3  105.67   17.02
   6  -8   3   75.45   14.12
  -6   8  -4  214.68   21.64
   6  -8   4  185.31   19.13
  -6   8  -5  188.89   21.39
   6  -8   5  163.27   18.66
  -6   8  -6  344.13   25.97
   6  -8   6  315.06   23.71
  -6   8  -7  283.19   24.01
   6  -8   7  252.78   22.36
  -6   7  -1  195.22   18.05
   6  -7   1  159.23   16.36
  -6   7  -2  214.89   19.89
   6  -7   2  183.52   18.35
  -6   7  -3  360.24   24.68
   6  -7   3  279.55   21.48
  -6   7  -4  240.47   21.94
   6  -7   4  200.24   19.25
  -6   7  -5  123.44   18.11
   6  -7   5  106.88   15.94
  -6   7  -6  139.10   19.62
   6  -7   6  164.41   18.78
  -6   7  -7  166.97   19.80
   6  -7   7  178.59   19.56
  -6   7  -8  159.09   19.20
   6  -7   8  194.14   20.12
  -6   6  -1  213.58   18.24
   6  -6   1  202.01   18.07
  -6   6  -2  320.96   21.97
   6  -6   2  273.66   19.73
  -6   6  -3  367.16   24.14
   6  -6   3  290.96   21.26
  -6   6  -4  124.73   17.99
   6  -6   4   73.63   12.99
  -6   6  -5  135.99   18.90
   6  -6   5  126.11   17.22
  -6   6  -6  193.56   20.18
   6  -6   6  170.10   18.60
  -6   6  -7  181.46   19.83
   6  -6   7  171.01   18.65
  -6   6  -8  204.45   20.36
   6  -6   8  202.41   20.04
  -6   5  -1  224.30   17.83
   6  -5   1  160.97   16.45
  -6   5  -2  295.27   20.62
   6  -5   2  280.56   20.29
  -6   5  -3  255.52   20.52
   6  -5   3  217.57   18.83
  -6   5  -4  179.28   18.69
   6  -5   4  168.99   17.46
  -6   5  -5  208.86   20.14
   6  -5   5  170.61   18.03
  -6   5  -6  314.52   23.32
   6  -5   6  263.25   21.17
  -6   5  -7  177.83   19.17
   6  -5   7  190.23   19.20
  -6   5  -8   71.60   14.04
   6  -5   8   56.37   13.10
  -6   5  -9  137.63   18.71
   6  -5   9  165.65   18.54
  -6   4  -1  257.46   17.99
   6  -4   1  246.71   18.94
  -6   4  -2  271.56   19.44
   6  -4   2  249.93   19.24
  -6   4  -3  272.38   20.42
   6  -4   3  239.46   19.37
  -6   4  -4  255.98   20.63
   6  -4   4  190.81   18.22
  -6   4  -5  361.59   24.00
   6  -4   5  325.69   22.28
  -6   4  -6  440.03   25.94
   6  -4   6  415.56   24.96
  -6   4  -7  155.58   17.90
   6  -4   7  147.03   17.62
  -6   4  -8   27.36   10.88
   6  -4   8   45.82   12.61
  -6   4  -9  174.22   18.79
   6  -4   9  173.48   18.76
  -6   3  -1  184.90   15.49
   6  -3   1  172.84   15.60
  -6   3  -2  296.94   19.38
   6  -3   2  292.68   19.95
  -6   3  -3  428.52   23.79
   6  -3   3  392.46   22.25
  -6   3  -4  195.93   18.06
   6  -3   4  182.64   17.52
  -6   3  -5  338.93   22.80
   6  -3   5  297.19   21.38
  -6   3  -6  194.69   18.69
   6  -3   6  194.90   18.67
  -6   3  -7  100.71   15.65
   6  -3   7   98.51   15.41
  -6   3  -8  118.53   17.02
   6  -3   8  155.87   18.24
  -6   3  -9  250.75   20.88
   6  -3   9  276.49   21.64
  -6   2  -1  270.76   16.97
   6  -2   1  286.68   19.36
  -6   2  -2  368.60   20.52
   6  -2   2  343.98   21.12
  -6   2  -3  148.45   15.14
   6  -2   3  147.38   15.87
  -6   2  -4  170.89   16.41
   6  -2   4  128.94   15.54
  -6   2  -5  251.12   19.82
   6  -2   5  200.47   18.25
  -6   2  -6  273.78   20.29
   6  -2   6  247.38   20.12
  -6   2  -7  120.67   16.59
   6  -2   7  141.99   16.91
  -6   2  -8  170.69   17.45
   6  -2   8  181.31   18.39
  -6   2  -9  204.23   18.83
   6  -2   9  207.21   19.33
  -6   1  -1   72.91   10.52
   6  -1   1   61.73   11.22
  -6   1  -2  184.35   14.62
   6  -1   2  185.11   16.76
  -6   1  -3  196.39   15.70
   6  -1   3  208.67   17.02
  -6   1  -4  314.28   19.48
   6  -1   4  280.87   19.31
  -6   1  -5  307.17   20.27
   6  -1   5  317.87   21.60
  -6   1  -6  402.36   22.82
   6  -1   6  382.50   23.50
  -6   1  -7  195.95   17.39
   6  -1   7  179.11   17.86
  -6   1  -8  190.85   17.59
   6  -1   8  189.74   18.33
  -6   1  -9   47.49   11.80
   6  -1   9   66.67   13.40
  -6   0   0  455.29   19.39
   6   0   0  443.69   22.47
  -6   0  -1  121.97   11.95
   6   0   1  134.94   15.24
  -6   0  -2   17.17    7.16
   6   0   2   18.03    7.83
  -6   0  -3  227.59   16.13
   6   0   3  223.65   18.36
  -6   0  -4  305.78   18.81
   6   0   4  292.03   20.41
  -6   0  -5  526.60   24.30
   6   0   5  480.87   25.37
  -6   0  -6  259.21   18.29
   6   0   6  265.50   20.15
  -6   0  -7  266.94   18.94
   6   0   7  229.62   19.36
  -6   0  -8  122.81   15.95
   6   0   8  144.95   17.59
  -6  -1   0  634.17   21.90
   6   1   0  618.10   27.13
  -6  -1  -1  338.75   16.73
   6   1   1  358.02   21.64
  -6  -1  -2  275.50   15.85
   6   1   2  270.77   19.61
  -6  -1  -3  277.59   16.43
   6   1   3  259.58   19.43
  -6  -1  -4  201.80   15.16
   6   1   4  253.33   19.55
  -6  -1  -5  247.75   17.03
   6   1   5  232.76   19.28
  -6  -1  -6  202.70   16.13
   6   1   6  204.33   18.66
  -6  -1  -7  167.48   15.55
   6   1   7  164.14   17.48
  -6  -1  -8   97.28   14.07
   6   1   8   94.80   15.34
  -6  -2   0  409.38   17.30
  -6  -2   0  438.75   24.00
   6   2   0  476.06   16.25
  -6  -2  -1  203.83   13.13
  -6  -2  -1  209.79   17.34
  -6  -2  -2  290.37   15.43
   6   2   2  350.81   22.36
  -6  -2  -3  163.49   12.84
   6   2   3  211.30   18.45
  -6  -2  -4  225.10   15.05
   6   2   4  230.79   19.36
  -6  -2  -5  201.05   15.11
   6   2   5  210.62   19.09
  -6  -2  -6  295.57   17.66
   6   2   6  302.84   21.77
  -6  -2  -7   91.08   12.53
   6   2   7  120.37   16.93
  -6  -3   0  219.70   12.95
  -6  -3   0  198.01   17.39
   6   3   0  217.79   12.95
  -6  -3  -1  234.75   13.26
  -6  -3  -1  226.17   19.29
   6   3   1  239.84   13.34
  -6  -3  -2  168.12   11.70
  -6  -3  -2  211.17   19.39
   6   3   2  217.11   12.99
  -6  -3  -3  148.77   11.13
  -6  -3  -3  201.05   18.92
   6   3   3  202.90   17.42
  -6  -3  -4  182.16   18.76
   6   3   5  221.05   19.59
   6   3   6  112.15   17.09
  -6  -4   0  153.39   17.55
   6   4   0  155.34   12.72
  -6  -4  -1   98.55   14.83
   6   4   1  135.78   12.21
  -6  -4  -2  111.57   16.11
   6   4   2  133.13   12.12
  -6  -4  -3  197.42   19.51
   6   4   3  188.31   13.80
  -6  -4  -4  199.78   19.88
   6   4   4  220.40   15.30
  -6  -4  -5  155.80   18.19
  -6  -5   0  226.51   20.68
   6   5   0  242.02   16.09
  -6  -5  -1  240.32   21.50
   6   5   1  229.44   15.86
  -6  -5  -2   67.25   13.97
   6   5   2   80.21   11.38
  -6  -5  -3   71.02   15.00
   6   5   3   76.69   11.23
  -6  -5  -4  110.64   17.67
   6   5   4   92.40   12.47
  -6  -6   0  134.71   18.71
   6   6   0  160.88   15.18
  -6  -6  -1   93.21   15.89
   6   6   1  103.46   13.15
  -6  -6  -2  134.81   19.10
   6   6   2  146.94   14.50
  -6  -7   0   89.49   16.82
   6   7   0  109.91   14.15
  -7   8  -1  179.34   20.69
   7  -8   1  136.85   19.25
  -7   8  -2  129.11   19.55
   7  -8   2  106.55   17.68
  -7   8  -3  227.85   24.10
   7  -8   3  157.35   21.59
  -7   7  -1  138.49   19.16
   7  -7   1  116.16   17.72
  -7   7  -2   93.92   17.14
   7  -7   2   71.84   14.51
  -7   7  -3  194.27   23.47
   7  -7   3  169.86   19.87
  -7   7  -4  109.02   19.11
   7  -7   4   75.44   15.17
  -7   6  -1  166.95   19.15
   7  -6   1  157.75   18.77
  -7   6  -2  209.05   21.25
   7  -6   2  200.80   20.33
  -7   6  -3  134.90   19.52
   7  -6   3  164.90   19.27
  -7   6  -4  153.10   21.06
   7  -6   4  139.63   19.75
  -7   6  -5  127.74   19.96
   7  -6   5  123.66   19.19
  -7   5  -1  163.24   18.03
   7  -5   1  126.11   18.14
  -7   5  -2  195.67   20.01
   7  -5   2  197.66   20.01
  -7   5  -3  279.95   23.90
   7  -5   3  245.50   21.80
  -7   5  -4  165.47   21.80
   7  -5   4  145.29   19.72
  -7   5  -5  114.16   19.41
   7  -5   5   87.09   16.75
  -7   5  -6  141.53   20.97
   7  -5   6  114.80   17.92
  -7   4  -1  150.08   16.99
   7  -4   1  150.95   18.15
  -7   4  -2   78.00   14.50
   7  -4   2   92.61   16.17
  -7   4  -3  174.02   19.50
   7  -4   3  135.51   16.93
  -7   4  -4  114.78   17.89
   7  -4   4   90.60   16.22
  -7   4  -5   98.26   17.52
   7  -4   5  105.71   17.62
  -7   4  -6  310.23   25.20
   7  -4   6  278.33   23.77
  -7   3  -1  114.62   15.42
   7  -3   1  100.68   16.63
  -7   3  -2   71.30   13.69
   7  -3   2   82.46   14.91
  -7   3  -3  103.26   16.32
   7  -3   3   90.52   15.81
  -7   3  -4  127.27   18.11
   7  -3   4  123.02   18.39
  -7   3  -5  260.98   22.50
   7  -3   5  234.73   21.86
  -7   3  -6  216.21   21.33
   7  -3   6  217.88   21.85
  -7   2  -1  262.42   19.08
   7  -2   1  276.03   21.76
  -7   2  -2   81.26   13.50
   7  -2   2   85.87   15.38
  -7   2  -3   82.38   14.37
   7  -2   3   61.68   13.86
  -7   2  -4  142.40   17.25
   7  -2   4  127.12   17.63
  -7   2  -5  293.62   23.16
   7  -2   5  299.55   23.48
  -7   2  -6  264.14   22.69
   7  -2   6  246.74   22.40
  -7   1  -1  499.30   23.96
   7  -1   1  505.12   27.71
  -7   1  -2  272.82   19.43
   7  -1   2  285.93   22.26
  -7   1  -3  232.49   18.47
   7  -1   3  240.67   21.25
  -7   1  -4  102.94   15.24
   7  -1   4  123.01   18.28
  -7   1  -5   59.27   13.18
   7  -1   5   47.07   13.42
  -7   1  -6  162.93   17.90
   7  -1   6  139.91   19.00
  -7   0   0  243.59   16.51
   7   0   0  279.39   21.95
  -7   0  -1  132.05   14.20
   7   0   1   99.65   15.39
  -7   0  -2  153.89   15.05
   7   0   2  188.36   19.24
  -7   0  -3  217.57   17.43
   7   0   3  232.20   20.94
  -7   0  -4  241.99   18.76
   7   0   4  249.33   21.53
  -7   0  -5  154.28   16.89
   7   0   5  174.56   18.42
  -7  -1   0  285.57   17.33
   7   1   0  264.51   21.79
  -7  -1  -1  141.91   13.62
   7   1   1  160.34   18.56
  -7  -1  -2  113.07   13.13
   7   1   2  144.85   19.82
  -7  -1  -3   91.35   12.92
   7   1   3   84.60   15.11
  -7  -1  -4  135.66   14.54
   7   1   4  133.33   19.14
  -7  -2   0   94.37   11.25
   7   2   0   91.53   15.95
  -7  -2  -1  163.69   13.50
   7   2   1  185.89   18.93
  -7  -2  -2  107.08   12.05
   7   2   2  128.16   19.11
  -7  -2  -3   95.12   11.47
   7   2   3  124.81   18.26
   7   2   4   93.03   16.79
   7   3   0  168.47   19.99
   7   3   1  215.57   21.46
   7   3   2  118.75   17.99
  -7  -4   0  162.45   19.81
  -7  -4  -1   72.19   15.44

;
_shelx_hkl_checksum    9395
