# Supplementary material for: Structure and reactivity of a mononuclear gold(II) complex
Source: Springer Nature journal article supplement (doi:10.1038/nchem.2836), 2017-08-07
Supplement: 41557_2017_BFnchem2836_MOESM13_ESM.txt [file 41557_2017_BFnchem2836_MOESM13_ESM.txt]

#
# h,k,l, Fc-squared, Fo-squared, sigma(Fo-squared), status flag
#
data_sp_tpp_thf_0m
_shelx_title ' sp_tpp_thf_0m_a.res in P-1'
_shelx_refln_list_code          4
_shelx_F_calc_maximum      193.10
_exptl_crystal_F_000       399.00
_reflns_d_resolution_high  0.7585

loop_
 _space_group_symop_operation_xyz
 'x, y, z'
 '-x, -y, -z'

_cell_length_a     6.1691
_cell_length_b    10.6043
_cell_length_c    12.4939
_cell_angle_alpha  97.479
_cell_angle_beta   97.453
_cell_angle_gamma  99.925

_shelx_F_squared_multiplier     1.000

loop_
 _refln_index_h
 _refln_index_k
 _refln_index_l
 _refln_F_squared_calc
 _refln_F_squared_meas
 _refln_F_squared_sigma
 _refln_observed_status
   1   0   0       2084.74       2147.15        73.26 o
   2   0   0       4471.43       4836.02       226.51 o
   3   0   0       2445.53       2440.88        88.13 o
   4   0   0       2541.23       2721.04        63.71 o
   5   0   0       1647.33       1656.83        42.04 o
   6   0   0       1635.81       1550.27        50.53 o
   7   0   0        948.89        886.90        61.61 o
  -8   1   0        375.33        366.39        40.92 o
  -7   1   0       1150.51       1090.75        50.21 o
  -6   1   0        314.28        299.20        29.40 o
  -5   1   0        920.02        834.59        36.30 o
  -4   1   0       1937.35       1898.58        32.83 o
  -3   1   0       1825.78       1790.99        96.00 o
  -2   1   0       2615.59       2534.64       120.74 o
  -1   1   0      10899.73      11334.70       598.41 o
   1   1   0       2600.18       2629.92        80.24 o
   2   1   0       2480.35       2543.85        68.33 o
   3   1   0       5118.65       5608.21       211.73 o
   4   1   0       2364.02       2432.09       102.77 o
   5   1   0        465.77        455.91        19.25 o
   6   1   0       2289.37       2161.26        58.65 o
   7   1   0        991.59        956.12        46.68 o
  -8   2   0        406.87        383.19        41.11 o
  -7   2   0       1482.63       1364.78        55.65 o
  -6   2   0        949.50        902.05        42.37 o
  -5   2   0       1810.34       1692.14        49.60 o
  -4   2   0       2005.24       1900.49        43.55 o
  -3   2   0       3483.89       3537.62       144.03 o
  -2   2   0        112.99         93.41        14.83 o
  -1   2   0      26274.34      29144.50       820.85 o
   0   2   0        639.92        538.73        13.68 o
   1   2   0       9315.74       9810.68       370.74 o
   2   2   0       6598.38       7199.21        95.89 o
   3   2   0       3174.98       3417.09       103.17 o
   4   2   0        711.01        670.62        26.35 o
   5   2   0        762.77        734.33        34.12 o
   6   2   0       1533.55       1533.84        59.68 o
   7   2   0        331.39        321.63        31.64 o
  -8   3   0        705.98        746.02        52.28 o
  -7   3   0        708.39        761.41        56.29 o
  -6   3   0       1254.96       1170.64        47.28 o
  -5   3   0       1106.30       1038.45        39.68 o
  -4   3   0        803.53        730.49        29.58 o
  -3   3   0       3008.36       2878.43        88.40 o
  -2   3   0       3142.96       3212.19        70.22 o
  -1   3   0       9336.47       9989.35       238.79 o
   0   3   0       5743.84       6152.95       135.65 o
   1   3   0       3890.49       4048.16        78.51 o
   2   3   0       8370.96       9186.09       185.38 o
   3   3   0       3138.55       3162.17       114.31 o
   4   3   0        888.74        899.00        30.79 o
   5   3   0       1079.77       1101.68        57.29 o
   6   3   0        738.34        738.59        27.89 o
   7   3   0        567.48        579.85        68.80 o
  -8   4   0        492.95        500.68        47.20 o
  -7   4   0        442.78        396.69        38.51 o
  -6   4   0       1362.35       1251.72        49.89 o
  -5   4   0        512.87        451.49        30.50 o
  -4   4   0       2578.68       2348.90        95.79 o
  -3   4   0        455.33        334.44        29.41 o
  -2   4   0       5307.75       5503.01       123.44 o
  -1   4   0       2656.98       2574.39        27.97 o
   0   4   0       5898.62       6015.55       288.14 o
   1   4   0       5007.80       5370.82        81.61 o
   2   4   0       2754.67       2868.21        42.58 o
   3   4   0       2592.60       2577.43        81.22 o
   4   4   0        618.48        603.55        36.85 o
   5   4   0       1553.68       1616.04        75.04 o
   6   4   0        492.63        532.37        35.45 o
   7   4   0        557.61        559.13        68.18 o
  -7   5   0        471.67        467.15        41.85 o
  -6   5   0        670.50        648.10        39.95 o
  -5   5   0       1642.43       1581.96        49.82 o
  -4   5   0       2440.70       2325.30        70.18 o
  -3   5   0        644.88        604.55        26.42 o
  -2   5   0       1050.62        943.54        22.43 o
  -1   5   0       1064.67        890.17        18.96 o
   0   5   0       4733.53       4686.63       273.04 o
   1   5   0       4633.25       4848.09       163.97 o
   2   5   0       2526.09       2580.51       124.96 o
   3   5   0       2234.86       2305.86        86.71 o
   4   5   0        490.11        513.05        19.64 o
   5   5   0       1021.22       1050.60        65.55 o
   6   5   0        777.55        813.70        43.71 o
  -7   6   0       1326.59       1259.75        58.78 o
  -6   6   0        725.24        664.18        51.37 o
  -5   6   0       1884.57       1782.28        54.34 o
  -4   6   0        831.78        787.27        35.88 o
  -3   6   0        907.25        865.65        53.47 o
  -2   6   0        658.07        597.29        18.37 o
  -1   6   0       4344.62       4566.17        45.53 o
   0   6   0       2348.48       2321.63        74.71 o
   1   6   0       2115.45       1922.19        64.81 o
   2   6   0       3633.37       3580.44        87.41 o
   3   6   0        149.36        155.28        19.66 o
   4   6   0       1087.58       1122.68        51.61 o
   5   6   0        309.97        355.19        32.94 o
   6   6   0        507.99        521.72        45.04 o
  -7   7   0        745.00        728.67        50.07 o
  -6   7   0        644.88        606.74        41.57 o
  -5   7   0        759.43        702.59        53.21 o
  -4   7   0       1633.00       1578.47        67.50 o
  -3   7   0       1835.43       1878.22       103.99 o
  -2   7   0       1965.26       1983.07        75.50 o
  -1   7   0       2484.05       2561.60        63.54 o
   0   7   0       2497.78       2610.12       135.70 o
   1   7   0       2286.21       2247.28        70.97 o
   2   7   0       3826.00       3791.21       203.02 o
   3   7   0        644.75        722.48        44.81 o
   4   7   0        713.47        676.63        38.99 o
   5   7   0        900.78        904.95        45.54 o
   6   7   0        372.65        352.60        37.27 o
  -7   8   0        335.26        363.50        42.09 o
  -6   8   0        682.94        648.43        43.89 o
  -5   8   0       1229.65       1144.62        35.86 o
  -4   8   0        599.76        575.62        22.72 o
  -3   8   0        514.78        533.40        27.00 o
  -2   8   0       1697.33       1688.42       111.57 o
  -1   8   0       1472.83       1452.41        38.63 o
   0   8   0       1217.39       1182.32        21.30 o
   1   8   0       1681.73       1659.48       105.15 o
   2   8   0        468.35        505.12        32.13 o
   3   8   0       1953.33       1989.21       106.06 o
   4   8   0        790.47        793.95        43.84 o
   5   8   0        640.68        616.73        43.01 o
  -7   9   0        438.79        416.59       101.04 o
  -6   9   0        720.59        642.78        45.00 o
  -5   9   0       1546.59       1403.04        68.22 o
  -4   9   0       1193.99       1117.32        38.33 o
  -3   9   0        723.21        750.88        58.20 o
  -2   9   0       1274.02       1253.56        63.09 o
  -1   9   0       1981.66       1920.80        37.01 o
   0   9   0        566.97        530.72        45.81 o
   1   9   0       2654.22       2692.28        64.70 o
   2   9   0       1083.73       1150.26        55.88 o
   3   9   0        828.96        827.34        44.27 o
   4   9   0        653.80        728.13        53.97 o
   5   9   0         75.98         82.61        24.49 o
  -6  10   0        741.86        724.01        48.94 o
  -5  10   0       1042.29        988.56        49.02 o
  -4  10   0        884.06        870.61        43.16 o
  -3  10   0        969.37        999.39        73.27 o
  -2  10   0       1433.25       1481.60        78.90 o
  -1  10   0        972.93        917.88        41.29 o
   0  10   0       1665.56       1610.86        53.00 o
   1  10   0       1182.45       1215.71        53.09 o
   2  10   0       1470.50       1389.04        69.35 o
   3  10   0        577.68        580.94        43.24 o
   4  10   0        458.84        512.19        45.74 o
  -6  11   0        671.59        640.71        48.03 o
  -5  11   0        867.42        763.29        46.23 o
  -4  11   0        777.25        756.16        42.82 o
  -3  11   0        990.58       1053.67        67.98 o
  -2  11   0       1077.35       1149.79        72.23 o
  -1  11   0        266.02        274.47        29.86 o
   0  11   0       1164.13       1126.39        50.20 o
   1  11   0       1205.54       1121.64        75.76 o
   2  11   0       1277.94       1334.30        79.27 o
   3  11   0        496.25        541.89        46.07 o
  -5  12   0        413.30        367.00        39.34 o
  -4  12   0        491.23        487.22        54.55 o
  -3  12   0        868.99       1034.48        96.51 o
  -2  12   0        667.86        697.08        63.61 o
  -1  12   0        685.63        699.17        61.06 o
   0  12   0        680.22        725.11        44.51 o
   1  12   0       1330.13       1274.14        73.28 o
   2  12   0        640.08        671.35        48.61 o
  -4  13   0        331.00        287.43        58.79 o
  -3  13   0        588.24        709.53       101.04 o
  -2  13   0        592.54        645.83        46.72 o
  -1  13   0        602.29        645.06        46.55 o
   0  13   0        894.70        937.10        59.11 o
   1  13   0        657.05        608.86        49.01 o
  -1 -13   1       1229.06       1208.99        60.04 o
   0 -13   1        535.11        589.71        45.37 o
   1 -13   1        915.89        928.40        51.93 o
   2 -13   1        206.18        270.42        48.03 o
   3 -13   1        674.64        745.64        81.52 o
   4 -13   1        476.63        410.79        64.36 o
  -2 -12   1        557.41        537.32        45.22 o
  -1 -12   1        390.93        355.69        37.24 o
   0 -12   1       1182.73       1226.24        55.25 o
   1 -12   1        727.97        708.08        43.77 o
   2 -12   1        703.15        749.19        56.38 o
   3 -12   1        623.47        670.27        66.69 o
   4 -12   1        359.39        351.86        35.49 o
   5 -12   1        450.99        472.28        42.37 o
  -3 -11   1        453.11        473.13        73.36 o
  -2 -11   1       1117.13       1146.75        54.16 o
  -1 -11   1        552.26        579.42        45.86 o
   0 -11   1       1544.40       1544.68        55.97 o
   1 -11   1        411.65        444.41        35.52 o
   2 -11   1       1148.20       1106.41        69.42 o
   3 -11   1        950.47       1007.87       127.36 o
   4 -11   1        436.81        435.87        36.88 o
   5 -11   1        349.43        328.55        36.37 o
   6 -11   1        344.30        351.32        41.13 o
  -4 -10   1        378.09        382.53        39.92 o
  -3 -10   1        796.26        775.50        46.68 o
  -2 -10   1        656.74        680.33        49.25 o
  -1 -10   1        887.93        822.44        62.47 o
   0 -10   1       1875.66       1772.89       102.38 o
   1 -10   1       1002.61       1004.93        29.08 o
   2 -10   1        787.86        789.73        28.12 o
   3 -10   1        862.42        883.81        80.79 o
   4 -10   1        363.99        356.33        32.88 o
   5 -10   1        286.76        274.74        33.21 o
   6 -10   1        771.66        736.55        50.76 o
  -5  -9   1        636.19        616.91        45.58 o
  -4  -9   1        627.77        563.96        41.07 o
  -3  -9   1        924.10        893.27        46.04 o
  -2  -9   1        298.04        318.56        30.72 o
  -1  -9   1       2913.89       2934.52       134.61 o
   0  -9   1       1325.93       1252.00        37.87 o
   1  -9   1       1807.22       1756.56        52.97 o
   2  -9   1       1659.02       1794.14        86.53 o
   3  -9   1        753.72        811.01        69.99 o
   4  -9   1       1502.78       1368.73        50.20 o
   5  -9   1        405.68        390.96        36.70 o
   6  -9   1        748.92        776.17        67.51 o
  -5  -8   1        312.09        325.97        34.76 o
  -4  -8   1        708.02        660.00        41.24 o
  -3  -8   1        419.10        477.01        35.34 o
  -2  -8   1        188.52        213.39        24.90 o
  -1  -8   1       2188.83       2175.89       131.81 o
   0  -8   1       2022.15       2010.93        29.79 o
   1  -8   1       2398.12       2492.20        41.33 o
   2  -8   1       1845.67       1879.51        98.02 o
   3  -8   1        690.96        722.09        40.88 o
   4  -8   1        183.72        188.21        24.49 o
   5  -8   1        978.05        955.61        46.43 o
   6  -8   1        643.63        617.37        66.58 o
   7  -8   1        494.91        548.75        73.12 o
  -6  -7   1        657.33        696.07        45.93 o
  -5  -7   1        612.73        582.73        54.78 o
  -4  -7   1       1214.69       1293.66        61.52 o
  -3  -7   1       1030.10       1049.19        42.47 o
  -2  -7   1       2621.93       2582.16       141.20 o
  -1  -7   1       1449.19       1451.21        41.51 o
   0  -7   1       4652.46       4718.15       120.97 o
   1  -7   1       3051.88       3127.50        73.71 o
   2  -7   1        911.11        851.14        53.45 o
   3  -7   1       2447.53       2586.87       164.32 o
   4  -7   1        103.29        109.82        13.54 o
   5  -7   1       1185.87       1000.33        60.57 o
   6  -7   1        573.10        610.21        61.94 o
   7  -7   1        470.00        438.61        44.78 o
  -6  -6   1        448.48        514.43        40.16 o
  -5  -6   1        764.53        722.56        39.42 o
  -4  -6   1       1672.50       1680.54        57.00 o
  -3  -6   1        444.81        436.95        33.32 o
  -2  -6   1       2090.60       2087.49       133.10 o
  -1  -6   1       5124.91       5248.85       220.66 o
   0  -6   1       3858.96       3736.36        80.21 o
   1  -6   1       2643.88       2604.77        50.93 o
   2  -6   1       3168.01       3281.21       143.57 o
   3  -6   1       2560.68       2748.25       160.82 o
   4  -6   1       2087.21       1918.30        88.56 o
   5  -6   1        842.35        820.59        41.06 o
   6  -6   1        680.52        715.57        44.18 o
   7  -6   1        550.36        558.92        46.14 o
  -6  -5   1        559.84        495.95        37.47 o
  -5  -5   1       1153.70       1149.24        82.05 o
  -4  -5   1       1391.40       1404.44        30.72 o
  -3  -5   1        804.81        786.80        19.98 o
  -2  -5   1       2216.89       2141.66        87.43 o
  -1  -5   1       4649.22       4904.38        89.58 o
   0  -5   1       2763.43       2584.42       130.05 o
   1  -5   1       1049.32        852.89        38.67 o
   2  -5   1      10545.66      11261.06       662.25 o
   3  -5   1       1775.72       1826.07       121.49 o
   4  -5   1       1317.03       1265.30        40.72 o
   5  -5   1        491.55        442.39        32.50 o
   6  -5   1        717.70        672.30       108.99 o
   7  -5   1        472.92        506.54        63.90 o
  -7  -4   1        387.83        460.83        66.63 o
  -6  -4   1        746.66        676.90        57.11 o
  -5  -4   1       3014.31       2896.38        52.41 o
  -4  -4   1        759.26        714.64        23.83 o
  -3  -4   1       1086.02       1022.28        38.53 o
  -2  -4   1       3264.95       3468.15        77.60 o
  -1  -4   1       6845.91       7555.89       166.09 o
   0  -4   1       5684.15       6433.04       313.26 o
   1  -4   1       6468.60       6493.72       236.76 o
   2  -4   1       9430.07      10236.08       425.99 o
   3  -4   1        846.80        699.21        27.07 o
   4  -4   1       1148.36       1132.85        37.90 o
   5  -4   1       2322.44       2363.03        60.07 o
   6  -4   1        858.24        868.99        44.90 o
   7  -4   1        457.20        517.96        42.69 o
  -7  -3   1        371.73        343.59        69.89 o
  -6  -3   1       1062.61       1064.72        46.34 o
  -5  -3   1       1974.67       1948.44       106.39 o
  -4  -3   1       1398.74       1390.34        38.99 o
  -3  -3   1       4008.08       4233.56        82.14 o
  -2  -3   1       3744.90       3922.25       110.39 o
  -1  -3   1       3526.72       3587.12        99.04 o
   0  -3   1         95.65        132.64        22.86 o
   1  -3   1      23659.56      26134.25      1306.15 o
   2  -3   1       6187.82       6554.23       300.28 o
   3  -3   1       2273.28       2101.43        73.14 o
   4  -3   1       1247.49       1104.60        50.35 o
   5  -3   1       1655.73       1628.44        92.43 o
   6  -3   1        702.35        616.50        37.83 o
   7  -3   1        381.82        373.86        38.92 o
  -7  -2   1        559.44        564.97        68.92 o
  -6  -2   1       1517.26       1501.04        56.04 o
  -5  -2   1       1746.20       1731.26        55.68 o
  -4  -2   1       1926.96       1909.22        64.29 o
  -3  -2   1       2192.35       2251.87        83.51 o
  -2  -2   1       4964.93       5225.06       194.03 o
  -1  -2   1        431.97        362.13         7.32 o
   0  -2   1      11750.59      12934.29       661.08 o
   1  -2   1      37288.50      41440.14       260.57 o
   2  -2   1       4702.09       4481.40       265.73 o
   3  -2   1       3093.13       2884.74       104.63 o
   4  -2   1       3672.12       3598.18        83.38 o
   5  -2   1       1324.19       1189.11        49.80 o
   6  -2   1        987.75        956.51        43.92 o
   7  -2   1        912.26        924.17        49.38 o
  -7  -1   1        559.95        525.17        37.02 o
  -6  -1   1       1442.11       1289.56        46.16 o
  -5  -1   1        802.03        794.85        23.90 o
  -4  -1   1       1580.03       1541.15        63.45 o
  -3  -1   1       1144.43       1093.40        56.03 o
  -2  -1   1       2236.06       2190.93        35.52 o
  -1  -1   1       2924.52       2996.88        43.95 o
   0  -1   1      10659.82       3714.02      3853.39 o
   1  -1   1       3561.20       3701.63        31.59 o
   2  -1   1       3942.54       3964.67       170.21 o
   3  -1   1       2079.94       1940.08        72.57 o
   4  -1   1       3899.77       4015.38        51.22 o
   5  -1   1       1062.33       1062.75        22.31 o
   6  -1   1        291.00        234.53        26.41 o
   7  -1   1       1738.97       1727.16        62.38 o
  -7   0   1        785.65        771.53        42.86 o
  -6   0   1       2109.64       2014.39        56.18 o
  -5   0   1       1824.39       1799.22        55.95 o
  -4   0   1       1941.34       1956.37        40.79 o
  -3   0   1       3010.17       2865.62        45.56 o
  -2   0   1       4515.52       4904.50       127.06 o
  -1   0   1       6503.23       7195.36       133.97 o
   1   0   1       1603.95       1572.70        33.55 o
   2   0   1       2456.39       2377.83       118.86 o
   3   0   1       7787.66       8152.71       296.80 o
   4   0   1       1912.03       1848.10        59.04 o
   5   0   1       1519.72       1468.95        29.13 o
   6   0   1        419.87        437.88        32.37 o
   7   0   1        409.62        410.88        55.76 o
  -8   1   1        206.23        194.64        31.41 o
  -7   1   1        532.86        507.02        37.69 o
  -6   1   1        556.64        502.22        33.64 o
  -5   1   1       2818.12       2826.36        69.80 o
  -4   1   1       1741.75       1705.63        42.32 o
  -3   1   1       2359.49       2394.06        57.35 o
  -2   1   1       2521.77       2555.00        25.65 o
  -1   1   1        513.76        435.75         9.31 o
   0   1   1       8430.63       9052.89       136.59 o
   1   1   1      14162.48      14891.69       857.00 o
   2   1   1       6247.27       6474.82       348.65 o
   3   1   1       5020.84       5280.93       298.29 o
   4   1   1       2565.63       2535.16        95.89 o
   5   1   1        834.04        801.45        38.31 o
   6   1   1       1207.81       1191.62        45.56 o
   7   1   1        533.19        512.43        37.79 o
  -8   2   1        360.54        378.35        40.85 o
  -7   2   1        623.34        616.56        40.98 o
  -6   2   1       1057.24        980.44        62.04 o
  -5   2   1       1195.39       1136.28        39.74 o
  -4   2   1       1457.92       1350.92        37.17 o
  -3   2   1       2273.52       2132.06        24.45 o
  -2   2   1       1093.83        940.69        43.90 o
  -1   2   1       3260.53       3427.20        29.51 o
   0   2   1       2018.85       1980.53        30.80 o
   1   2   1       3574.34       3731.43       172.36 o
   2   2   1       4806.58       4972.14       174.48 o
   3   2   1        859.05        769.02        29.55 o
   4   2   1       3169.93       3187.82       124.22 o
   5   2   1        357.45        376.68        19.46 o
   6   2   1        706.79        709.17        36.03 o
   7   2   1        649.93        591.38        38.20 o
  -8   3   1        413.51        432.16        43.98 o
  -7   3   1        337.38        326.51        42.34 o
  -6   3   1       1125.45       1066.95        62.42 o
  -5   3   1       1503.44       1450.15        76.81 o
  -4   3   1       3007.78       2821.35       165.09 o
  -3   3   1       5327.23       5702.45        97.16 o
  -2   3   1       2271.32       2266.17        28.57 o
  -1   3   1        110.94         91.68         6.81 o
   0   3   1       3127.09       3228.44        55.48 o
   1   3   1       5538.46       5721.24        58.84 o
   2   3   1       3598.50       3686.32        60.48 o
   3   3   1       3646.61       3723.63       142.24 o
   4   3   1        850.08        866.66        31.99 o
   5   3   1        579.49        589.28        25.49 o
   6   3   1        836.39        809.70        29.10 o
   7   3   1        625.00        741.97        73.86 o
  -8   4   1        118.45        150.64        31.20 o
  -7   4   1        707.96        677.42        43.48 o
  -6   4   1       1835.66       1751.06        56.01 o
  -5   4   1       1878.71       1684.43        90.09 o
  -4   4   1       1261.55       1146.74        36.42 o
  -3   4   1       2377.66       2309.76        41.16 o
  -2   4   1       1226.78       1113.21        22.79 o
  -1   4   1       3055.45       3046.61        45.39 o
   0   4   1       3366.97       3319.77        88.76 o
   1   4   1       2914.23       2895.39        52.06 o
   2   4   1       1699.51       1706.80        90.45 o
   3   4   1       3887.30       3871.75       126.96 o
   4   4   1        828.30        879.18        43.91 o
   5   4   1        863.10        862.28        43.40 o
   6   4   1        425.34        425.08        64.07 o
   7   4   1        250.40        248.47        53.14 o
  -7   5   1        775.76        809.44        47.51 o
  -6   5   1       1769.16       1589.42        54.44 o
  -5   5   1        732.35        618.58        51.04 o
  -4   5   1       1944.34       1884.02        47.28 o
  -3   5   1       2662.67       2593.50        80.51 o
  -2   5   1       1828.70       1787.66        32.20 o
  -1   5   1       3591.82       3611.48        93.28 o
   0   5   1       4907.33       4947.96       162.40 o
   1   5   1       3308.55       3277.08        51.66 o
   2   5   1       2529.10       2415.22       123.43 o
   3   5   1       2405.01       2416.43        70.84 o
   4   5   1        849.19        839.95        60.12 o
   5   5   1        959.71        915.87        51.71 o
   6   5   1        779.71        803.30        43.93 o
  -7   6   1        884.69        787.45        48.36 o
  -6   6   1        515.69        485.97        35.86 o
  -5   6   1        834.84        744.87        36.78 o
  -4   6   1       2755.66       2604.87        54.42 o
  -3   6   1       1580.69       1603.79        40.29 o
  -2   6   1       2146.25       2170.79        33.36 o
  -1   6   1       1061.57        964.52        21.01 o
   0   6   1       3372.32       3314.55        40.22 o
   1   6   1       1096.93       1001.04        32.23 o
   2   6   1       1273.17       1265.04        39.30 o
   3   6   1       1071.00       1123.65        41.08 o
   4   6   1       1568.41       1605.08        79.09 o
   5   6   1        985.20        982.15        46.17 o
   6   6   1        313.21        342.64        34.87 o
  -7   7   1        914.07        856.74        58.80 o
  -6   7   1        574.25        555.68        39.41 o
  -5   7   1       1624.28       1415.69        49.88 o
  -4   7   1       3553.67       3449.28       111.51 o
  -3   7   1       2332.29       2344.30       138.12 o
  -2   7   1       1167.58       1154.40        26.77 o
  -1   7   1       2989.23       3012.54        39.03 o
   0   7   1       2343.00       2129.77       188.57 o
   1   7   1       1142.65       1057.31        35.97 o
   2   7   1       3360.73       3309.21        65.80 o
   3   7   1       1093.72       1068.08        60.04 o
   4   7   1       1144.19       1135.37        69.20 o
   5   7   1        400.75        424.63        37.24 o
  -7   8   1        437.67        430.39        43.33 o
  -6   8   1        442.50        394.60        37.39 o
  -5   8   1       1080.41       1015.25        45.45 o
  -4   8   1       1168.46       1144.76        57.13 o
  -3   8   1       2221.80       2315.42       123.41 o
  -2   8   1       1812.42       1866.04        35.84 o
  -1   8   1       2881.40       2959.60        41.37 o
   0   8   1       1287.90       1192.48        39.58 o
   1   8   1       1876.57       1803.62        67.19 o
   2   8   1       2193.88       2097.19        56.87 o
   3   8   1       2593.01       2556.11       179.17 o
   4   8   1        685.32        657.38        57.58 o
   5   8   1        260.15        316.50        53.69 o
  -7   9   1        255.83        253.45        38.88 o
  -6   9   1        522.15        533.54        41.87 o
  -5   9   1       1468.55       1405.68        42.57 o
  -4   9   1       1099.12        972.81        31.05 o
  -3   9   1        972.71       1006.70        72.17 o
  -2   9   1       1435.20       1482.54        44.40 o
  -1   9   1       1801.31       1854.07        49.88 o
   0   9   1        952.89        967.33        39.78 o
   1   9   1       1531.76       1512.81        50.02 o
   2   9   1        958.37       1024.05        60.66 o
   3   9   1        944.52        980.80        60.61 o
   4   9   1        435.63        403.69        37.80 o
  -6  10   1        892.47        892.17        52.55 o
  -5  10   1        847.06        825.73        46.10 o
  -4  10   1       1287.61       1163.95        47.73 o
  -3  10   1        950.74        995.33        65.80 o
  -2  10   1       1416.70       1477.75        66.44 o
  -1  10   1       1617.63       1574.23        92.95 o
   0  10   1       1008.03        994.58        44.10 o
   1  10   1       1014.60        963.42        66.43 o
   2  10   1       1557.88       1553.18        57.72 o
   3  10   1        845.65        842.05        48.57 o
   4  10   1        517.72        543.82        44.37 o
  -6  11   1        406.97        408.48        42.99 o
  -5  11   1        760.88        732.31        45.94 o
  -4  11   1       1004.61       1009.52        46.92 o
  -3  11   1        382.01        444.60        26.92 o
  -2  11   1        988.63       1023.54        75.46 o
  -1  11   1        835.84        793.36        42.69 o
   0  11   1       1418.66       1389.09        54.76 o
   1  11   1       1350.92       1337.01        55.41 o
   2  11   1        727.39        775.36        69.78 o
   3  11   1        370.51        344.74        38.68 o
  -5  12   1        402.46        396.43        40.49 o
  -4  12   1        398.93        383.38        77.84 o
  -3  12   1        737.96        916.42        92.54 o
  -2  12   1       1123.83       1201.53       102.98 o
  -1  12   1        939.72       1022.90        53.11 o
   0  12   1        487.33        526.08        59.87 o
   1  12   1        529.68        618.07        60.30 o
   2  12   1        844.13        926.02        59.54 o
  -4  13   1        186.88        190.96        49.22 o
  -3  13   1        793.76        879.25        91.47 o
  -2  13   1        640.43        716.38        49.10 o
  -1  13   1        273.59        286.05        39.20 o
   0  13   1        288.46        293.95        37.11 o
  -1 -13   2        587.16        658.49        47.87 o
   0 -13   2        270.12        246.47        33.75 o
   1 -13   2       1024.90       1083.58        87.54 o
   2 -13   2        496.22        564.47        44.45 o
   3 -13   2        473.16        526.17        39.91 o
   4 -13   2        580.58        530.96        43.19 o
  -2 -12   2        452.59        398.23        95.46 o
  -1 -12   2        279.40        314.99        36.74 o
   0 -12   2        947.46        982.63        91.06 o
   1 -12   2       1073.25       1040.72       127.16 o
   2 -12   2        718.05        746.83        79.27 o
   3 -12   2        507.48        515.34        65.02 o
   4 -12   2        363.53        399.28        37.77 o
   5 -12   2        299.98        314.13        38.10 o
  -3 -11   2        723.29        743.79        60.08 o
  -2 -11   2        758.31        784.00        51.87 o
  -1 -11   2        183.01        201.95        28.96 o
   0 -11   2       1130.11       1055.00        47.67 o
   1 -11   2        975.82        939.27        50.06 o
   2 -11   2       1456.80       1449.10        83.32 o
   3 -11   2        814.08        940.08        75.46 o
   4 -11   2        378.32        373.73        41.97 o
   5 -11   2        396.45        371.62        38.40 o
  -4 -10   2        346.87        340.92        38.25 o
  -3 -10   2        547.81        602.18        43.01 o
  -2 -10   2        500.13        522.03        47.93 o
  -1 -10   2        565.04        562.83        37.20 o
   0 -10   2       1121.28       1080.00        71.32 o
   1 -10   2       1442.61       1432.70        33.82 o
   2 -10   2       1143.97       1218.63        79.98 o
   3 -10   2        979.36       1053.98        92.92 o
   4 -10   2        700.49        707.28        42.01 o
   5 -10   2        258.65        270.04        49.92 o
   6 -10   2        339.74        362.69        53.71 o
  -5  -9   2        700.15        779.08        49.88 o
  -4  -9   2        541.12        548.58        40.78 o
  -3  -9   2       1255.67       1297.43        74.96 o
  -2  -9   2       1270.47       1304.18        60.85 o
  -1  -9   2       1040.63       1034.72        59.99 o
   0  -9   2       1639.84       1593.17        32.43 o
   1  -9   2       3151.57       3095.81        91.98 o
   2  -9   2       1395.99       1449.81        57.90 o
   3  -9   2       1008.07       1063.66        93.15 o
   4  -9   2       1511.76       1488.71        60.41 o
   5  -9   2        169.33        176.16        28.58 o
   6  -9   2        414.13        428.87        43.02 o
  -5  -8   2        482.01        539.83        47.72 o
  -4  -8   2        773.90        765.61        43.68 o
  -3  -8   2       1557.32       1638.27        54.79 o
  -2  -8   2        321.49        340.51        29.81 o
  -1  -8   2       2187.77       2119.19       149.81 o
   0  -8   2       4101.82       3996.08       106.45 o
   1  -8   2       1807.44       1747.19        61.43 o
   2  -8   2       1272.27       1246.43        76.51 o
   3  -8   2       1486.13       1617.06       132.92 o
   4  -8   2       2541.57       2485.37       165.64 o
   5  -8   2       1238.94       1180.15       129.19 o
   6  -8   2        548.01        564.45        85.91 o
   7  -8   2        402.13        405.38        45.13 o
  -6  -7   2        682.76        688.11        45.81 o
  -5  -7   2        557.13        621.85        41.61 o
  -4  -7   2       1787.61       1791.16        58.70 o
  -3  -7   2       1772.33       1869.73        68.27 o
  -2  -7   2        624.76        625.83        31.63 o
  -1  -7   2       1343.75       1272.94        49.04 o
   0  -7   2       2577.23       2446.14       117.52 o
   1  -7   2       1469.34       1334.22        62.43 o
   2  -7   2       1090.34        986.74        50.40 o
   3  -7   2       6062.31       6741.11       578.37 o
   4  -7   2        706.88        641.06        50.49 o
   5  -7   2        428.79        429.98        35.68 o
   6  -7   2        670.53        685.55        53.99 o
   7  -7   2        297.22        284.03        38.12 o
  -6  -6   2        558.90        569.04        40.77 o
  -5  -6   2       1045.30       1073.88        62.78 o
  -4  -6   2       2617.60       2447.66        61.75 o
  -3  -6   2       1163.78       1176.34        25.64 o
  -2  -6   2       2372.53       2440.52        62.93 o
  -1  -6   2       3495.49       3496.88       132.61 o
   0  -6   2       2908.08       2999.16        82.23 o
   1  -6   2       3996.17       3988.79       156.99 o
   2  -6   2       4412.27       4609.88       192.75 o
   3  -6   2       5705.81       6393.02       498.27 o
   4  -6   2        637.90        585.90        35.50 o
   5  -6   2        812.90        842.71        89.30 o
   6  -6   2       1018.55       1021.04        81.40 o
   7  -6   2        636.50        704.99        50.56 o
  -6  -5   2        532.49        549.14        37.71 o
  -5  -5   2        893.66        832.41        49.10 o
  -4  -5   2       1836.32       1785.87        66.42 o
  -3  -5   2       1717.36       1694.27       104.69 o
  -2  -5   2       2426.35       2347.29        75.06 o
  -1  -5   2       3946.83       4267.64       116.91 o
   0  -5   2       2332.99       2439.10       135.65 o
   1  -5   2       1077.94        991.97        38.62 o
   2  -5   2      11409.27      12591.98       584.91 o
   3  -5   2       2088.62       2288.64       183.47 o
   4  -5   2       1472.06       1418.53       101.54 o
   5  -5   2       1585.96       1557.65       139.40 o
   6  -5   2        976.42        991.21        49.78 o
   7  -5   2        669.33        676.92        48.70 o
  -7  -4   2        602.76        489.20        67.01 o
  -6  -4   2        740.28        701.66        33.95 o
  -5  -4   2       1672.67       1608.21        52.66 o
  -4  -4   2       1875.82       1897.10        50.66 o
  -3  -4   2       1488.02       1415.50        48.16 o
  -2  -4   2       4425.71       4804.40       178.21 o
  -1  -4   2       1098.23       1010.19        19.21 o
   0  -4   2       3368.20       2994.18       259.49 o
   1  -4   2       2479.49       2531.46       111.37 o
   2  -4   2       7064.76       7614.81       110.77 o
   3  -4   2       2484.79       2304.28        56.89 o
   4  -4   2       2899.88       2885.48       113.31 o
   5  -4   2       1941.54       1951.18        92.67 o
   6  -4   2        888.66        898.61        47.07 o
   7  -4   2        284.98        293.03        37.16 o
  -7  -3   2        458.74        382.77        32.42 o
  -6  -3   2        580.75        621.11        26.59 o
  -5  -3   2       2025.95       2039.60        39.71 o
  -4  -3   2       1879.50       1842.17        50.28 o
  -3  -3   2       2215.37       2196.46        69.63 o
  -2  -3   2        233.35        162.37        10.70 o
  -1  -3   2       2635.10       2686.73        36.98 o
   0  -3   2       5182.91       5248.74        78.12 o
   1  -3   2       9813.17      11222.90      1093.79 o
   2  -3   2       3233.51       3181.73        33.07 o
   3  -3   2       1296.42       1183.51        33.36 o
   4  -3   2       1974.91       1936.72        47.89 o
   5  -3   2       1716.79       1843.28       137.69 o
   6  -3   2        998.39       1014.97        47.85 o
   7  -3   2        291.34        264.37        34.71 o
  -7  -2   2        436.57        441.13        35.59 o
  -6  -2   2       1083.34       1047.42        45.00 o
  -5  -2   2       1529.94       1529.51        42.47 o
  -4  -2   2       1393.93       1331.84        46.44 o
  -3  -2   2       4859.54       5005.28        50.21 o
  -2  -2   2       2513.11       2521.40        33.03 o
  -1  -2   2      15211.78      17216.28       326.76 o
   0  -2   2       1706.54       1654.35        45.79 o
   1  -2   2       5398.40       6077.18       313.60 o
   2  -2   2       1324.28       1208.92        18.12 o
   3  -2   2       4687.45       5036.70       163.87 o
   4  -2   2       2742.50       2735.12        54.85 o
   5  -2   2       1396.72       1406.91        47.03 o
   6  -2   2       1188.75       1228.99        50.66 o
   7  -2   2        246.01        286.81        34.92 o
  -7  -1   2        415.50        435.54        35.57 o
  -6  -1   2        356.89        362.01        21.67 o
  -5  -1   2        774.50        744.98        23.38 o
  -4  -1   2       3855.30       3999.54       127.36 o
  -3  -1   2       1714.14       1623.69        26.56 o
  -2  -1   2       5563.26       6057.50        75.44 o
  -1  -1   2        578.49        477.29        10.45 o
   0  -1   2        360.20        321.41         8.27 o
   1  -1   2       5412.06       5621.17       142.06 o
   2  -1   2       7453.55       8346.22        74.67 o
   3  -1   2       5293.57       5767.79       133.46 o
   4  -1   2       1621.64       1605.59        42.71 o
   5  -1   2       2123.17       2112.77        39.16 o
   6  -1   2        653.43        635.64        37.92 o
   7  -1   2        970.94        959.05        50.38 o
  -8   0   2        463.20        492.57        63.11 o
  -7   0   2        776.52        736.74        42.26 o
  -6   0   2       1147.11       1073.30        43.78 o
  -5   0   2        923.36        922.83        24.15 o
  -4   0   2       2640.79       2743.87        36.93 o
  -3   0   2        986.49        871.89        30.45 o
  -2   0   2       4138.72       4266.86        48.07 o
  -1   0   2       2082.74       2156.15        49.49 o
   0   0   2       2181.08       2336.73        45.44 o
   1   0   2         83.98        174.72        13.24 o
   2   0   2       5113.61       5513.78        76.58 o
   3   0   2       1820.95       1731.94        30.20 o
   4   0   2       1347.64       1261.10        38.65 o
   5   0   2       1738.08       1679.59        32.40 o
   6   0   2         56.70         60.51        18.19 o
   7   0   2        528.80        580.48        59.32 o
  -8   1   2        537.83        575.21        46.49 o
  -7   1   2        404.23        434.91        36.92 o
  -6   1   2        735.81        713.91        44.18 o
  -5   1   2       3106.08       3152.44        53.13 o
  -4   1   2       2404.79       2315.49        35.12 o
  -3   1   2       3229.83       3320.13        56.70 o
  -2   1   2       7487.69       8447.58       133.10 o
  -1   1   2       6327.56       7057.93       203.55 o
   0   1   2       4114.47       4501.38        68.52 o
   1   1   2       6964.50       6868.42       567.66 o
   2   1   2       4325.44       4619.99        98.84 o
   3   1   2       2279.70       2176.49        83.03 o
   4   1   2       2745.47       2687.41        64.60 o
   5   1   2        630.02        602.13        20.10 o
   6   1   2        986.12        941.87        42.43 o
   7   1   2        455.69        428.54        54.69 o
  -8   2   2        274.00        252.23        35.01 o
  -7   2   2        248.05        265.25        31.73 o
  -6   2   2        456.76        487.89        36.29 o
  -5   2   2       3602.24       3628.00        65.37 o
  -4   2   2       1246.14       1176.46        30.75 o
  -3   2   2       2367.21       2350.60        45.99 o
  -2   2   2       2992.94       3062.35        63.79 o
  -1   2   2       2906.36       3151.12        29.74 o
   0   2   2       2455.77       2389.94        29.89 o
   1   2   2       3839.08       3726.03       213.10 o
   2   2   2       3842.44       3961.31       178.66 o
   3   2   2       1083.53       1024.97       107.61 o
   4   2   2       3335.78       3343.79       118.75 o
   5   2   2        742.29        749.07        28.28 o
   6   2   2       1086.36       1075.39       104.01 o
   7   2   2        384.67        391.95        36.28 o
  -8   3   2        320.38        308.93        38.00 o
  -7   3   2        368.31        335.50        33.87 o
  -6   3   2       2296.46       2164.94       109.56 o
  -5   3   2       2131.74       2036.77        52.18 o
  -4   3   2       1458.96       1414.60        23.11 o
  -3   3   2       3297.83       3269.83       105.30 o
  -2   3   2       2900.87       2902.82        58.50 o
  -1   3   2       2810.95       2875.35        30.63 o
   0   3   2       3893.01       4042.52        58.62 o
   1   3   2       7423.20       7544.78       407.53 o
   2   3   2       2565.35       2382.06       159.86 o
   3   3   2       1799.98       1696.01        55.06 o
   4   3   2        954.10        994.72        56.07 o
   5   3   2       1188.46       1178.21        31.49 o
   6   3   2        768.84        676.22        51.67 o
   7   3   2        401.49        408.72        61.92 o
  -8   4   2        412.46        444.04        44.60 o
  -7   4   2       1085.97       1020.72        59.61 o
  -6   4   2       1739.27       1626.06        74.47 o
  -5   4   2        371.01        323.38        26.65 o
  -4   4   2       1864.72       1798.49        62.38 o
  -3   4   2       4080.80       4235.71        90.17 o
  -2   4   2       6956.46       7689.21        88.52 o
  -1   4   2       2798.12       2778.00        46.11 o
   0   4   2       1299.10       1175.19        20.61 o
   1   4   2       6937.74       7669.61       249.78 o
   2   4   2        884.02        774.12        39.33 o
   3   4   2       3078.00       3088.55        93.73 o
   4   4   2        869.69        893.74        39.96 o
   5   4   2       1410.48       1173.86        97.76 o
   6   4   2        414.89        434.34        37.10 o
  -7   5   2        864.41        821.76        47.03 o
  -6   5   2       1201.64       1140.46        47.58 o
  -5   5   2       1229.38       1078.87        41.72 o
  -4   5   2       2554.78       2373.07       103.56 o
  -3   5   2       4574.67       4890.49       135.08 o
  -2   5   2       2652.12       2711.09        36.20 o
  -1   5   2       3287.21       3395.49        58.46 o
   0   5   2       6662.92       6868.48        75.35 o
   1   5   2       1740.89       1640.00        63.88 o
   2   5   2       2436.15       2409.88       107.32 o
   3   5   2       1708.85       1681.47        55.03 o
   4   5   2       2147.36       1866.47       183.84 o
   5   5   2       1145.73       1168.66        47.47 o
   6   5   2        261.22        260.13        30.37 o
  -7   6   2        591.99        606.18        43.74 o
  -6   6   2        606.98        552.23        47.48 o
  -5   6   2       1454.24       1290.80        46.18 o
  -4   6   2       1425.70       1273.80        28.16 o
  -3   6   2       2187.04       2215.40        49.18 o
  -2   6   2       2966.37       2972.56        40.25 o
  -1   6   2       1702.39       1675.92        33.64 o
   0   6   2       4381.52       4469.03        99.64 o
   1   6   2       1666.00       1583.58        40.08 o
   2   6   2       3034.59       3133.26       138.93 o
   3   6   2       2449.12       2453.06        79.27 o
   4   6   2       2544.31       2545.52       119.33 o
   5   6   2        288.66        306.20        43.16 o
   6   6   2        509.53        491.31        39.75 o
  -7   7   2        551.04        485.38        42.99 o
  -6   7   2        576.63        537.69        78.37 o
  -5   7   2       1402.92       1262.03        47.99 o
  -4   7   2       2281.69       2185.54        34.73 o
  -3   7   2       1266.03       1281.25        58.94 o
  -2   7   2       1561.78       1608.66        31.69 o
  -1   7   2       1998.24       2020.71        32.66 o
   0   7   2       2341.45       2374.01        55.95 o
   1   7   2       3153.46       3014.73        63.37 o
   2   7   2       1046.35       1010.51        51.20 o
   3   7   2       1000.12        980.79        63.64 o
   4   7   2        521.14        505.32        35.96 o
   5   7   2        526.43        577.56        64.60 o
  -7   8   2        316.51        260.40        34.94 o
  -6   8   2        979.79        960.42        48.60 o
  -5   8   2        883.41        824.92        42.07 o
  -4   8   2       1668.00       1641.45        83.82 o
  -3   8   2       3194.00       3320.15       135.38 o
  -2   8   2       1052.95       1070.40        28.13 o
  -1   8   2       2624.56       2694.25        40.37 o
   0   8   2       1892.89       1726.37        47.26 o
   1   8   2       1841.46       1794.88        50.27 o
   2   8   2       1793.07       1723.90        83.12 o
   3   8   2       1818.52       1803.99       125.35 o
   4   8   2        680.21        652.05        54.40 o
   5   8   2        613.13        657.35        45.14 o
  -6   9   2        614.05        533.41        41.13 o
  -5   9   2        658.67        630.82        40.59 o
  -4   9   2        829.67        802.60        29.38 o
  -3   9   2        829.61        845.67        32.69 o
  -2   9   2        989.49        980.10        37.17 o
  -1   9   2       1140.87       1163.21        28.50 o
   0   9   2       1798.60       1742.93        51.47 o
   1   9   2       1117.42       1095.74        43.53 o
   2   9   2       1414.54       1385.98        56.15 o
   3   9   2       1036.85       1037.27        65.52 o
   4   9   2        681.10        672.46        45.61 o
  -6  10   2        379.57        393.86        40.51 o
  -5  10   2        660.77        635.82        33.57 o
  -4  10   2        790.28        725.70        35.82 o
  -3  10   2        427.59        471.64        25.72 o
  -2  10   2       1350.46       1365.33        35.39 o
  -1  10   2       1314.28       1298.07        48.04 o
   0  10   2       1309.15       1326.24        49.02 o
   1  10   2        501.41        529.92        36.69 o
   2  10   2       1077.72       1120.83        51.06 o
   3  10   2        756.92        750.06        81.37 o
  -5  11   2        705.81        710.04        36.38 o
  -4  11   2        394.78        429.38        49.53 o
  -3  11   2        629.66        637.98        29.99 o
  -2  11   2        916.66        987.88        47.46 o
  -1  11   2       1456.55       1487.24        55.23 o
   0  11   2        332.78        328.06        54.74 o
   1  11   2        774.78        799.42        45.78 o
   2  11   2        516.29        526.60        42.34 o
   3  11   2        564.51        605.87        47.08 o
  -5  12   2        365.49        477.72        84.18 o
  -4  12   2        729.09        730.16        70.87 o
  -3  12   2        927.26       1065.44       120.81 o
  -2  12   2        465.25        521.86        40.34 o
  -1  12   2        321.66        403.98        39.01 o
   0  12   2        254.94        319.73        36.04 o
   1  12   2       1193.14       1118.19        55.63 o
   2  12   2        782.57        859.70        52.93 o
  -3  13   2        503.17        529.80        45.98 o
  -2  13   2        341.21        399.97        41.34 o
  -1  13   2        170.46        233.49        33.94 o
   0  13   2       1130.74       1172.50       100.52 o
  -1 -13   3        612.05        639.07        48.35 o
   0 -13   3        182.24        186.31        30.62 o
   1 -13   3        607.74        609.45       102.10 o
   2 -13   3        685.52        721.31        47.16 o
   3 -13   3        608.50        587.07        41.66 o
   4 -13   3        350.05        325.43        36.71 o
  -2 -12   3        553.12        595.14        53.18 o
  -1 -12   3        732.44        784.30        47.49 o
   0 -12   3        584.35        555.12        39.93 o
   1 -12   3        675.84        717.13        64.69 o
   2 -12   3        801.75        882.10        91.23 o
   3 -12   3        665.22        663.14        40.78 o
   4 -12   3        336.15        385.91        38.18 o
   5 -12   3        924.86        885.68        53.23 o
  -3 -11   3        320.98        325.84        38.09 o
  -2 -11   3       1238.78       1149.84       105.80 o
  -1 -11   3        469.44        502.83        37.99 o
   0 -11   3        551.54        595.78        38.73 o
   1 -11   3       1851.54       1868.54       156.62 o
   2 -11   3       1413.53       1381.21        96.64 o
   3 -11   3        732.65        806.98        86.94 o
   4 -11   3        411.57        447.56        38.66 o
   5 -11   3       1021.37       1020.39        89.85 o
  -4 -10   3        270.05        304.42        44.33 o
  -3 -10   3       1013.34        959.82        50.50 o
  -2 -10   3       1272.19       1328.17        71.99 o
  -1 -10   3        536.14        556.99        37.07 o
   0 -10   3       1602.59       1527.68        51.56 o
   1 -10   3       1433.83       1402.46        57.66 o
   2 -10   3       1583.90       1539.35        78.18 o
   3 -10   3        320.94        366.16        24.42 o
   4 -10   3       1572.09       1615.14        58.57 o
   5 -10   3        875.90        806.32        90.64 o
   6 -10   3        492.95        499.05        95.53 o
  -5  -9   3        706.17        789.63        50.51 o
  -4  -9   3        493.67        525.26        43.35 o
  -3  -9   3       1792.97       1789.10        60.59 o
  -2  -9   3       1351.86       1375.16        84.70 o
  -1  -9   3        717.71        686.83        36.62 o
   0  -9   3       1680.48       1519.88        69.86 o
   1  -9   3       1174.09       1091.67        76.32 o
   2  -9   3        987.72       1007.29        44.33 o
   3  -9   3        898.06        960.26        77.53 o
   4  -9   3       3045.71       2861.31       160.87 o
   5  -9   3        195.26        195.67        38.77 o
   6  -9   3        459.64        474.32       106.01 o
  -5  -8   3        639.42        614.63        44.42 o
  -4  -8   3       1009.94       1023.88        92.31 o
  -3  -8   3       1495.28       1431.90        59.49 o
  -2  -8   3       1662.00       1614.26       131.46 o
  -1  -8   3       3041.83       2931.84        58.37 o
   0  -8   3       1307.21       1277.05        27.58 o
   1  -8   3       2469.83       2394.43       107.88 o
   2  -8   3       1146.34       1114.81        49.96 o
   3  -8   3       4208.00       4507.53       331.49 o
   4  -8   3       2042.97       2014.71       158.58 o
   5  -8   3        720.56        713.11        47.98 o
   6  -8   3        317.33        310.74        52.01 o
   7  -8   3        619.54        672.01       121.33 o
  -6  -7   3        438.43        410.39        71.11 o
  -5  -7   3        544.46        541.58        38.89 o
  -4  -7   3        883.25        872.87        42.55 o
  -3  -7   3       1542.19       1576.16        54.67 o
  -2  -7   3        444.20        452.84        17.55 o
  -1  -7   3       2186.58       2047.99        82.04 o
   0  -7   3       1945.97       1936.64        78.44 o
   1  -7   3       2575.12       2536.42        59.48 o
   2  -7   3       1607.68       1584.68        92.29 o
   3  -7   3       3114.38       3475.72       256.24 o
   4  -7   3        475.92        474.71        32.49 o
   5  -7   3       1423.12       1438.13       141.96 o
   6  -7   3       1025.89       1099.37       138.86 o
   7  -7   3        615.89        622.49        52.20 o
  -6  -6   3        750.21        689.12        63.66 o
  -5  -6   3        672.23        654.48        38.29 o
  -4  -6   3       1655.92       1664.91        75.95 o
  -3  -6   3       1371.31       1385.17        31.19 o
  -2  -6   3       3618.69       3711.58        45.44 o
  -1  -6   3       1397.75       1220.98        25.50 o
   0  -6   3       2445.87       2441.06        98.63 o
   1  -6   3       1753.98       1727.10        99.58 o
   2  -6   3       2508.74       2610.41       107.13 o
   3  -6   3       1550.86       1679.63       117.86 o
   4  -6   3       1690.89       1719.67        52.54 o
   5  -6   3       1003.90        970.98       124.25 o
   6  -6   3       1036.83       1131.18       131.14 o
   7  -6   3        456.64        521.76        51.63 o
  -6  -5   3        475.20        510.62        36.55 o
  -5  -5   3        870.96        831.65        34.08 o
  -4  -5   3       1907.81       1889.30        66.23 o
  -3  -5   3       1465.53       1489.38        37.03 o
  -2  -5   3       3116.57       3040.95        39.13 o
  -1  -5   3        269.36        205.91        12.63 o
   0  -5   3       4831.41       4350.68       390.24 o
   1  -5   3       3228.24       3365.37       298.84 o
   2  -5   3       5545.94       5951.54       184.59 o
   3  -5   3       1482.70       1384.53        41.54 o
   4  -5   3       1456.41       1578.58        48.82 o
   5  -5   3       1291.98       1388.36       137.38 o
   6  -5   3        713.86        813.80        65.31 o
   7  -5   3        846.43        902.71        59.29 o
  -7  -4   3        618.48        612.90        68.53 o
  -6  -4   3        700.88        728.46        29.01 o
  -5  -4   3       1227.10       1184.04        32.17 o
  -4  -4   3        368.61        383.78        18.62 o
  -3  -4   3       2616.92       2610.77        45.51 o
  -2  -4   3       1681.70       1641.43        62.00 o
  -1  -4   3       5984.61       5962.07        52.44 o
   0  -4   3       3535.58       3359.21        88.12 o
   1  -4   3       3370.30       3272.37       161.44 o
   2  -4   3        965.95        904.66        31.79 o
   3  -4   3       2802.21       2861.08        51.75 o
   4  -4   3       2434.26       2615.05       140.36 o
   5  -4   3        905.56        949.98        64.60 o
   6  -4   3        816.03        881.51        56.65 o
   7  -4   3        489.18        531.61        66.27 o
  -7  -3   3        601.48        584.52        40.22 o
  -6  -3   3        868.66        845.49        30.09 o
  -5  -3   3        613.77        603.46        24.11 o
  -4  -3   3       1059.07       1004.66        26.23 o
  -3  -3   3       3114.58       3084.69        89.72 o
  -2  -3   3       1427.49       1224.52        23.25 o
  -1  -3   3       7251.32       7712.28        73.15 o
   0  -3   3       1300.37       1183.07        28.87 o
   1  -3   3       2900.93       2687.85       110.25 o
   2  -3   3       1224.93       1192.66        65.30 o
   3  -3   3       2845.16       2969.89        78.65 o
   4  -3   3       2740.69       2996.60        61.71 o
   5  -3   3        983.01       1023.78        44.07 o
   6  -3   3       1438.86       1411.43        62.06 o
   7  -3   3        270.66        334.23        39.08 o
  -7  -2   3        538.12        565.03        38.98 o
  -6  -2   3       1219.64       1175.13        52.20 o
  -5  -2   3        661.93        661.94        24.24 o
  -4  -2   3       2905.59       2911.55        42.45 o
  -3  -2   3       3757.02       3885.77        66.57 o
  -2  -2   3       1840.17       1776.74        26.39 o
  -1  -2   3        178.19        141.05         9.96 o
   0  -2   3       8313.09       8815.41       166.47 o
   1  -2   3        266.87        211.46        11.11 o
   2  -2   3       4027.21       4450.68       306.80 o
   3  -2   3       2716.73       2723.70        88.38 o
   4  -2   3        967.26        904.99        22.70 o
   5  -2   3       1183.11       1187.27        45.51 o
   6  -2   3        487.10        509.20        37.70 o
   7  -2   3        151.33        251.77        35.62 o
  -7  -1   3        754.65        744.68        43.14 o
  -6  -1   3        514.24        556.09        24.01 o
  -5  -1   3       1603.60       1606.88        33.79 o
  -4  -1   3       4735.45       4919.17        89.10 o
  -3  -1   3       1738.61       1621.51        29.78 o
  -2  -1   3       3028.48       2994.22        33.30 o
  -1  -1   3       6242.18       6950.56       145.98 o
   0  -1   3      10461.54      10900.62        81.92 o
   1  -1   3      11889.39      11812.06       863.44 o
   2  -1   3       3365.65       3655.46       252.38 o
   3  -1   3       4115.06       4380.10        45.64 o
   4  -1   3       1221.74       1189.53        31.13 o
   5  -1   3       1511.53       1562.70        49.94 o
   6  -1   3        633.88        696.02        39.72 o
   7  -1   3        831.97        812.56        47.98 o
  -8   0   3        339.72        373.76        40.26 o
  -7   0   3        952.96        880.26        45.39 o
  -6   0   3        140.31        134.61        22.34 o
  -5   0   3       1229.24       1255.65        29.15 o
  -4   0   3       3090.57       3299.83        43.04 o
  -3   0   3       2238.87       2186.79        54.00 o
  -2   0   3       2545.72       2548.31        78.15 o
  -1   0   3       6787.61       7369.46        48.15 o
   0   0   3         85.83        108.27        17.86 o
   1   0   3       2580.70       2534.66        82.37 o
   2   0   3       5485.90       6215.24       397.46 o
   3   0   3       3324.56       3567.72        66.51 o
   4   0   3       1250.69       1181.37        26.35 o
   5   0   3        997.88       1024.43        27.65 o
   6   0   3        794.03        777.49        41.71 o
   7   0   3        808.56        770.26        46.11 o
  -8   1   3        496.22        483.36        44.12 o
  -7   1   3        378.08        394.61        35.73 o
  -6   1   3       2092.76       1999.05        57.68 o
  -5   1   3       4153.22       4204.33        51.78 o
  -4   1   3       1986.15       2024.73        37.38 o
  -3   1   3       2494.02       2663.44        39.33 o
  -2   1   3       2990.85       3060.67        63.23 o
  -1   1   3       5582.26       6072.01       114.06 o
   0   1   3       7650.53       8373.14        81.28 o
   1   1   3       1273.98       1155.89        16.08 o
   2   1   3       6753.66       7918.36       506.95 o
   3   1   3       1520.17       1426.61        32.74 o
   4   1   3       1689.35       1648.21        36.82 o
   5   1   3        833.69        861.14        26.69 o
   6   1   3        916.78        930.59        43.18 o
   7   1   3        263.35        305.04        33.80 o
  -8   2   3        508.07        468.18        42.58 o
  -7   2   3        500.72        494.94        37.85 o
  -6   2   3       2369.24       2171.94        78.99 o
  -5   2   3       1749.37       1782.51        31.05 o
  -4   2   3       1532.57       1464.76        26.94 o
  -3   2   3       1841.38       1821.45        28.04 o
  -2   2   3       9574.42      10867.33       240.23 o
  -1   2   3       6174.75       6835.22        69.57 o
   0   2   3       4157.23       4438.78        60.78 o
   1   2   3       5870.28       6282.09        77.95 o
   2   2   3       4747.38       5274.68       276.43 o
   3   2   3       3317.73       3189.20        94.68 o
   4   2   3       2090.20       2027.67        78.64 o
   5   2   3       1365.24       1392.15        33.96 o
   6   2   3        661.13        626.06        82.28 o
   7   2   3        439.40        362.25        51.09 o
  -8   3   3        258.37        239.36        33.88 o
  -7   3   3        904.02        846.41        45.53 o
  -6   3   3        897.46        859.75        41.22 o
  -5   3   3       1540.83       1497.80        27.37 o
  -4   3   3       2210.20       2248.59        42.69 o
  -3   3   3       3580.22       3609.86       127.42 o
  -2   3   3       3487.29       3771.12        39.97 o
  -1   3   3       3552.94       3737.01        39.76 o
   0   3   3       5355.20       5668.14        80.70 o
   1   3   3       6702.97       7394.98        57.21 o
   2   3   3       2002.70       1993.59        40.76 o
   3   3   3       2175.00       2072.08       108.65 o
   4   3   3       1283.38       1334.10        44.29 o
   5   3   3       2274.86       2148.54        64.04 o
   6   3   3        735.56        604.86        64.45 o
  -8   4   3        295.02        293.58        38.10 o
  -7   4   3        901.38        907.69        81.45 o
  -6   4   3        506.43        487.95        34.37 o
  -5   4   3       1714.52       1622.07        48.26 o
  -4   4   3       2832.22       2797.04        38.11 o
  -3   4   3       4312.09       4638.76        90.63 o
  -2   4   3       2281.50       2274.54        32.67 o
  -1   4   3       3218.45       3383.22        58.46 o
   0   4   3       1371.30       1241.30        45.44 o
   1   4   3       3354.06       3268.40       131.85 o
   2   4   3       4184.44       4037.08       159.35 o
   3   4   3       2090.36       2063.55        65.20 o
   4   4   3       3046.52       2954.82       121.01 o
   5   4   3        616.10        535.33        50.46 o
   6   4   3        607.11        658.93        38.78 o
  -7   5   3        615.72        551.16        43.14 o
  -6   5   3       1263.99       1117.34        46.76 o
  -5   5   3       1186.46       1105.50        41.89 o
  -4   5   3       2442.31       2292.38        79.83 o
  -3   5   3       2300.39       2296.97        47.49 o
  -2   5   3       2523.58       2630.34        36.98 o
  -1   5   3       2244.04       2336.73        59.07 o
   0   5   3       2028.62       1967.41        33.88 o
   1   5   3       2674.82       2345.38       167.49 o
   2   5   3       3928.91       3630.91       185.01 o
   3   5   3       1522.51       1489.57        60.46 o
   4   5   3       1134.60       1137.95        43.69 o
   5   5   3        611.84        664.61        38.79 o
   6   5   3        250.44        257.29        30.94 o
  -7   6   3        177.36        167.09        28.46 o
  -6   6   3        837.07        801.15        42.14 o
  -5   6   3       1652.20       1520.10        87.79 o
  -4   6   3       1375.88       1286.01        30.00 o
  -3   6   3       3161.89       3298.61        78.70 o
  -2   6   3       3089.24       3162.40        46.29 o
  -1   6   3       1406.28       1315.42        28.94 o
   0   6   3       3816.29       3949.48        45.64 o
   1   6   3       3536.15       3353.15       133.77 o
   2   6   3       1539.84       1509.67        79.56 o
   3   6   3       2964.59       2988.31        98.61 o
   4   6   3        758.74        774.88        40.20 o
   5   6   3       1257.45       1262.85        80.39 o
  -7   7   3        384.61        392.90        39.61 o
  -6   7   3        639.16        598.63        39.19 o
  -5   7   3       1156.35       1114.90        56.55 o
  -4   7   3       1353.77       1336.37        28.99 o
  -3   7   3        667.18        690.14        24.26 o
  -2   7   3       1130.25       1141.15        27.79 o
  -1   7   3       1706.26       1577.45        29.95 o
   0   7   3       1235.01       1169.77        23.08 o
   1   7   3       1905.64       1870.19        48.36 o
   2   7   3        556.65        569.07        31.97 o
   3   7   3       1339.69       1288.69        47.88 o
   4   7   3       1926.25       2011.26       121.07 o
   5   7   3        437.80        474.66        51.03 o
  -7   8   3        463.28        428.28        42.48 o
  -6   8   3        792.57        760.22        44.27 o
  -5   8   3        753.17        753.69        40.72 o
  -4   8   3       2462.67       2408.52        40.57 o
  -3   8   3       1221.02       1302.92        33.61 o
  -2   8   3        756.53        759.40        25.05 o
  -1   8   3       1273.68       1219.00        28.40 o
   0   8   3       1950.44       1898.28        49.66 o
   1   8   3        804.37        772.44        35.75 o
   2   8   3       1971.12       1892.27        55.21 o
   3   8   3        710.53        643.16        63.09 o
   4   8   3        659.13        742.09        88.97 o
   5   8   3        244.80        267.60        41.42 o
  -6   9   3        458.85        448.63        40.01 o
  -5   9   3        915.79        901.68        45.60 o
  -4   9   3        576.65        581.06        27.23 o
  -3   9   3       1154.40       1258.21        35.26 o
  -2   9   3       1567.23       1539.63        52.89 o
  -1   9   3       1586.97       1621.36        57.54 o
   0   9   3       1383.45       1303.75        45.11 o
   1   9   3        386.30        377.99        29.73 o
   2   9   3       1309.57       1233.14        49.68 o
   3   9   3       1040.33        983.60        48.71 o
   4   9   3        501.30        497.83       102.57 o
  -6  10   3        213.28        226.16        33.01 o
  -5  10   3        668.03        662.17        43.31 o
  -4  10   3        591.14        608.79        29.00 o
  -3  10   3       1348.48       1425.49        78.75 o
  -2  10   3       1534.60       1519.63        37.91 o
  -1  10   3        673.91        617.75        37.49 o
   0  10   3         50.06         63.54        17.90 o
   1  10   3       1073.23       1102.62        48.17 o
   2  10   3        912.57        887.88        47.45 o
   3  10   3        922.98        966.13        52.30 o
  -5  11   3        598.11        590.86        35.03 o
  -4  11   3        641.62        593.47        34.13 o
  -3  11   3        975.18        974.99        41.53 o
  -2  11   3        869.43       1004.58        47.79 o
  -1  11   3        411.70        433.90        35.76 o
   0  11   3        553.96        616.75        40.82 o
   1  11   3       1016.85       1013.30        50.71 o
   2  11   3        499.10        504.84        41.97 o
  -4  12   3        953.43        998.78        56.58 o
  -3  12   3        761.93        838.06        93.57 o
  -2  12   3        480.88        478.97        41.11 o
  -1  12   3        527.25        585.93        42.87 o
   0  12   3        857.66        860.66        48.89 o
   1  12   3        500.35        484.42        43.76 o
  -3  13   3        776.50        939.58        55.09 o
  -2  13   3        460.02        500.61        76.50 o
  -1  13   3        597.12        703.67        49.04 o
  -1 -13   4        731.39        783.42        51.44 o
   0 -13   4        269.35        319.92        36.77 o
   1 -13   4        589.61        613.28        45.25 o
   2 -13   4        734.84        732.14        96.56 o
   3 -13   4        735.02        675.93        53.16 o
  -2 -12   4        856.88        873.56        53.49 o
  -1 -12   4        942.81       1032.72        53.04 o
   0 -12   4        565.33        534.27        40.33 o
   1 -12   4        827.39        815.23        83.95 o
   2 -12   4        787.37        859.18        46.47 o
   3 -12   4        808.67        791.33        34.29 o
   4 -12   4        309.46        373.72        40.02 o
  -3 -11   4        440.92        449.14        43.22 o
  -2 -11   4        841.12        853.94        48.28 o
  -1 -11   4        750.06        721.54        43.92 o
   0 -11   4       1240.27       1184.35        78.15 o
   1 -11   4       1249.01       1137.08        53.33 o
   2 -11   4        787.63        807.59        39.97 o
   3 -11   4        275.26        321.87        25.12 o
   4 -11   4        980.14       1017.36        52.75 o
   5 -11   4        899.39        951.46        54.69 o
  -4 -10   4        795.74        728.02        49.40 o
  -3 -10   4        765.44        736.86        45.46 o
  -2 -10   4       1047.78        987.83       101.04 o
  -1 -10   4       1205.89       1139.03        47.80 o
   0 -10   4       1261.71       1138.12        66.76 o
   1 -10   4        807.25        773.05        30.03 o
   2 -10   4       1396.84       1342.35        83.53 o
   3 -10   4       1087.65       1163.47        53.12 o
   4 -10   4       1749.04       1743.19        72.45 o
   5 -10   4        775.13        874.45        77.84 o
   6 -10   4        291.94        291.52        40.17 o
  -5  -9   4        567.45        614.96        48.93 o
  -4  -9   4        363.84        351.09        36.62 o
  -3  -9   4       1028.04       1026.19        49.16 o
  -2  -9   4        590.40        623.65        37.81 o
  -1  -9   4        408.36        409.36        19.77 o
   0  -9   4       1270.29       1201.91        35.15 o
   1  -9   4       1233.18       1214.53        31.88 o
   2  -9   4       1663.12       1654.35        57.99 o
   3  -9   4       1699.17       1770.87       128.27 o
   4  -9   4        445.16        450.21        36.73 o
   5  -9   4        391.66        451.93        43.17 o
   6  -9   4        606.89        581.31        48.30 o
  -5  -8   4        771.90        773.77        95.62 o
  -4  -8   4        796.79        805.32        44.55 o
  -3  -8   4       1014.95       1032.78        45.68 o
  -2  -8   4       1562.42       1323.42       160.54 o
  -1  -8   4       2436.81       2324.37       123.40 o
   0  -8   4        858.32        836.83        43.13 o
   1  -8   4       1922.10       1898.81        48.71 o
   2  -8   4       1566.11       1596.09        54.68 o
   3  -8   4       1271.79       1288.36       106.17 o
   4  -8   4       1087.93       1097.04       113.93 o
   5  -8   4        394.34        417.89        39.77 o
   6  -8   4        592.66        685.85        50.54 o
  -6  -7   4        441.05        464.79        41.91 o
  -5  -7   4        496.76        593.03        92.33 o
  -4  -7   4       1399.66       1350.52        81.99 o
  -3  -7   4        620.15        610.82        23.35 o
  -2  -7   4       1304.54       1406.34        84.89 o
  -1  -7   4       2198.21       1783.05       104.57 o
   0  -7   4       1436.34       1326.42        29.93 o
   1  -7   4       2035.99       2048.99       152.18 o
   2  -7   4       2561.06       2579.50        72.15 o
   3  -7   4       1451.03       1499.15        94.23 o
   4  -7   4       1488.56       1545.56       183.14 o
   5  -7   4       1307.54       1405.47        67.22 o
   6  -7   4        662.50        755.72        69.23 o
   7  -7   4        308.41        314.74        57.79 o
  -6  -6   4        652.42        711.04        51.42 o
  -5  -6   4       1210.28       1139.18        62.09 o
  -4  -6   4        721.13        740.19        27.16 o
  -3  -6   4        911.54        894.55        26.48 o
  -2  -6   4       1108.22       1085.21        26.47 o
  -1  -6   4        950.35        941.21        57.86 o
   0  -6   4       1869.86       1599.34       146.51 o
   1  -6   4       2189.94       2135.65       164.98 o
   2  -6   4       1710.52       1627.50        52.36 o
   3  -6   4       1327.22       1344.15        71.49 o
   4  -6   4        922.63        934.49        65.91 o
   5  -6   4       1258.17       1305.60       166.09 o
   6  -6   4        315.21        335.91        87.94 o
   7  -6   4        450.55        503.35        49.58 o
  -6  -5   4        842.59        861.76        49.08 o
  -5  -5   4       1558.51       1504.43        37.88 o
  -4  -5   4        661.67        688.30        34.07 o
  -3  -5   4       1394.44       1348.84        62.47 o
  -2  -5   4       2600.99       2557.10        50.15 o
  -1  -5   4       3187.14       2999.06        80.22 o
   0  -5   4       2171.78       1924.42       119.48 o
   1  -5   4       4081.23       3948.37        96.45 o
   2  -5   4       1282.81       1229.82        48.99 o
   3  -5   4       1658.21       1687.29        30.87 o
   4  -5   4       1317.76       1381.81        47.45 o
   5  -5   4       1278.05       1299.20        51.40 o
   6  -5   4        548.96        598.67        43.91 o
   7  -5   4        545.03        533.58        50.34 o
  -7  -4   4        676.73        676.47        69.11 o
  -6  -4   4        712.10        725.66        29.69 o
  -5  -4   4        589.42        611.57        28.00 o
  -4  -4   4       1315.43       1276.49        30.88 o
  -3  -4   4       3821.24       3897.64        89.95 o
  -2  -4   4       6487.87       6875.98       284.52 o
  -1  -4   4        164.70        127.74        15.06 o
   0  -4   4       1707.30       1570.05        46.83 o
   1  -4   4       1973.05       1736.92       131.40 o
   2  -4   4       3681.71       3954.27       307.20 o
   3  -4   4       2934.17       3062.10       106.22 o
   4  -4   4       2075.77       2222.18       147.38 o
   5  -4   4        519.32        592.26        58.24 o
   6  -4   4        691.45        771.44       112.15 o
   7  -4   4        299.54        354.29        41.61 o
  -7  -3   4        670.03        661.52        42.29 o
  -6  -3   4       1281.90       1299.45        47.79 o
  -5  -3   4        766.62        758.63        28.30 o
  -4  -3   4       2770.34       2682.72        43.22 o
  -3  -3   4       3297.77       3526.30        65.51 o
  -2  -3   4       1534.54       1386.06        47.44 o
  -1  -3   4       2393.24       2307.99        30.81 o
   0  -3   4       5061.10       5145.02        78.24 o
   1  -3   4       4092.39       3809.23       401.50 o
   2  -3   4       5045.77       5748.12       357.07 o
   3  -3   4       1759.68       1743.21        92.74 o
   4  -3   4       3921.56       4204.81       124.75 o
   5  -3   4        834.48        807.88        41.71 o
   6  -3   4        584.98        651.61        43.28 o
   7  -3   4        399.60        430.97        44.41 o
  -7  -2   4        544.54        475.64        37.28 o
  -6  -2   4        751.92        725.82        27.91 o
  -5  -2   4       1024.52       1000.60        29.21 o
  -4  -2   4       2360.94       2345.79        44.41 o
  -3  -2   4       3916.22       4071.18        47.57 o
  -2  -2   4        517.63        385.59        14.44 o
  -1  -2   4       5743.13       5929.73       141.24 o
   0  -2   4       2831.42       2813.06        68.42 o
   1  -2   4       1587.72       1424.33       110.83 o
   2  -2   4       2148.20       2136.09        95.48 o
   3  -2   4       4078.28       4273.75       207.35 o
   4  -2   4       1465.76       1434.59        65.98 o
   5  -2   4       1058.10       1191.13        47.01 o
   6  -2   4        520.39        522.21        72.19 o
   7  -2   4        452.51        465.89        42.44 o
  -7  -1   4        573.43        598.43        40.50 o
  -6  -1   4        507.29        533.88        24.33 o
  -5  -1   4       4824.54       4769.63        82.21 o
  -4  -1   4       3564.87       3733.11        67.40 o
  -3  -1   4       3511.09       3680.14        43.81 o
  -2  -1   4       3728.62       3894.43        40.47 o
  -1  -1   4       3997.98       4200.90        36.11 o
   0  -1   4       7878.36       8023.59       129.88 o
   1  -1   4       6280.86       6547.67       238.95 o
   2  -1   4       1226.75       1180.89        28.01 o
   3  -1   4       4589.85       5167.61       190.33 o
   4  -1   4       1357.87       1368.04        29.38 o
   5  -1   4       1554.59       1637.93        52.29 o
   6  -1   4       1038.40       1026.94        57.50 o
   7  -1   4        332.09        385.65        40.29 o
  -7   0   4        338.54        319.86        34.21 o
  -6   0   4       1019.59       1078.43        33.05 o
  -5   0   4       1693.80       1728.71        35.49 o
  -4   0   4       4173.07       4542.70        53.45 o
  -3   0   4       1729.47       1671.44        28.20 o
  -2   0   4       5601.53       6291.98        51.23 o
  -1   0   4       5455.35       5854.94       149.24 o
   0   0   4       1668.73       1653.96        63.19 o
   1   0   4       8368.22       9665.26       319.12 o
   2   0   4       6801.67       7639.26       181.56 o
   3   0   4       3319.37       3533.21        69.62 o
   4   0   4       3182.05       3268.31        64.19 o
   5   0   4       1430.37       1439.47        38.32 o
   6   0   4       1002.39       1031.26        47.61 o
   7   0   4        822.71        843.99        48.68 o
  -8   1   4        396.75        449.25        62.59 o
  -7   1   4        523.69        483.70        50.56 o
  -6   1   4       2089.72       2062.50        59.27 o
  -5   1   4        615.05        593.14        21.60 o
  -4   1   4       1670.03       1691.50        31.16 o
  -3   1   4       3418.69       3737.30        42.06 o
  -2   1   4       5551.48       6022.85       152.91 o
  -1   1   4       3030.34       3187.22        56.72 o
   0   1   4       3309.23       3396.88        32.20 o
   1   1   4       1186.46       1098.92        24.72 o
   2   1   4       4169.21       4377.72        72.97 o
   3   1   4       2455.01       2461.20        55.44 o
   4   1   4       1599.22       1590.28        33.13 o
   5   1   4       1511.70       1533.37        35.87 o
   6   1   4        741.64        770.87        88.68 o
   7   1   4        436.07        464.02        39.85 o
  -8   2   4        454.92        503.43        45.51 o
  -7   2   4        632.61        675.81       104.72 o
  -6   2   4        624.82        638.67        37.14 o
  -5   2   4       2063.28       2070.52        37.03 o
  -4   2   4       2005.04       2089.50        34.50 o
  -3   2   4       8211.55       9138.02       177.20 o
  -2   2   4       5631.97       6238.50       162.94 o
  -1   2   4       3184.86       3297.47        33.49 o
   0   2   4       4584.93       4877.21        77.06 o
   1   2   4       1400.30       1317.44        25.02 o
   2   2   4       3667.59       3937.45       150.76 o
   3   2   4       3503.64       3590.59        67.00 o
   4   2   4       2361.13       2339.86        60.21 o
   5   2   4       1437.30       1345.93        34.57 o
   6   2   4        740.16        782.26        40.90 o
   7   2   4        269.89        320.20        57.79 o
  -8   3   4        121.82        125.08        28.57 o
  -7   3   4        603.82        642.90        69.87 o
  -6   3   4        739.97        682.19        73.57 o
  -5   3   4       1647.03       1674.97        32.97 o
  -4   3   4       2375.44       2515.10        37.94 o
  -3   3   4       2122.90       2016.14        84.86 o
  -2   3   4       3835.51       4105.57        43.75 o
  -1   3   4       3987.18       3985.95        81.35 o
   0   3   4       1314.74       1163.17        21.19 o
   1   3   4       2219.54       2252.70        57.21 o
   2   3   4       2345.77       2526.15       154.79 o
   3   3   4       3200.31       3201.27        88.83 o
   4   3   4       2465.91       2378.46        92.38 o
   5   3   4       1072.61       1062.71        31.96 o
   6   3   4        671.84        626.97        64.57 o
  -8   4   4        293.43        281.17        49.01 o
  -7   4   4        280.10        275.80        32.31 o
  -6   4   4        503.55        483.47        34.43 o
  -5   4   4       1069.73       1041.78        26.47 o
  -4   4   4       2887.33       2845.15       100.05 o
  -3   4   4       2574.00       2566.73        46.81 o
  -2   4   4       3677.84       3903.81        91.22 o
  -1   4   4       1450.77       1356.37        25.23 o
   0   4   4       1931.61       1758.70        29.62 o
   1   4   4       5794.84       6272.13       234.09 o
   2   4   4       2709.37       2862.62        84.36 o
   3   4   4       1559.60       1488.15        50.20 o
   4   4   4       1150.40       1102.31        61.66 o
   5   4   4       1157.35       1192.82        45.93 o
   6   4   4        718.22        733.80        41.73 o
  -7   5   4        286.93        255.28        32.09 o
  -6   5   4        617.95        601.04        37.77 o
  -5   5   4        821.74        793.40        37.35 o
  -4   5   4       1598.04       1537.40        39.01 o
  -3   5   4       3252.52       3330.02        45.83 o
  -2   5   4       1343.27       1353.34        30.91 o
  -1   5   4       1923.32       1910.40        30.59 o
   0   5   4       2053.19       1916.75        40.05 o
   1   5   4       1085.75       1020.60        22.57 o
   2   5   4       1214.80       1172.78        50.36 o
   3   5   4        513.59        506.24        18.18 o
   4   5   4       1856.55       1751.08        57.91 o
   5   5   4       1409.39       1469.29        78.10 o
   6   5   4        276.60        341.48        35.07 o
  -7   6   4        482.06        463.58        40.07 o
  -6   6   4        731.28        712.89        40.80 o
  -5   6   4       1175.68       1125.65        43.96 o
  -4   6   4       1540.85       1407.83        37.59 o
  -3   6   4       3847.77       3889.25        74.31 o
  -2   6   4       1803.59       1816.43        33.81 o
  -1   6   4       1386.46       1404.61        41.52 o
   0   6   4       2686.08       2637.55        57.97 o
   1   6   4        975.23        790.45       102.51 o
   2   6   4        861.14        825.88        34.92 o
   3   6   4       2263.23       2183.66        57.71 o
   4   6   4        913.89        967.86        44.92 o
   5   6   4        396.02        447.18        38.52 o
  -7   7   4        447.22        382.60        39.27 o
  -6   7   4        381.31        388.51        36.91 o
  -5   7   4        847.75        820.18        40.97 o
  -4   7   4       1042.51       1043.86        30.85 o
  -3   7   4        895.85        918.04        24.70 o
  -2   7   4       2269.71       2362.55        40.52 o
  -1   7   4       3010.80       2978.05        89.43 o
   0   7   4       1848.42       1736.65        30.33 o
   1   7   4        907.42        815.52        35.18 o
   2   7   4        540.73        513.41        31.71 o
   3   7   4       2030.23       2019.10       105.43 o
   4   7   4       1248.42       1286.01        52.55 o
   5   7   4        411.82        381.42        37.83 o
  -7   8   4        239.07        170.57        29.99 o
  -6   8   4        661.60        649.89        42.74 o
  -5   8   4        399.81        387.70        33.79 o
  -4   8   4       1547.51       1628.36        39.71 o
  -3   8   4        902.88        971.17        51.62 o
  -2   8   4       1439.07       1537.37        35.12 o
  -1   8   4       3176.94       3132.82        66.22 o
   0   8   4        417.06        387.75        27.19 o
   1   8   4        319.70        267.10        27.17 o
   2   8   4       1053.36        985.88        42.65 o
   3   8   4        476.38        489.06        45.48 o
   4   8   4        557.41        508.44        54.45 o
  -6   9   4        499.34        527.04        62.83 o
  -5   9   4        679.29        692.23        47.50 o
  -4   9   4       1277.39       1265.56        33.16 o
  -3   9   4       2086.07       2227.54        93.39 o
  -2   9   4       2523.90       2571.88        47.26 o
  -1   9   4        738.97        673.43        44.27 o
   0   9   4        846.55        839.32        38.27 o
   1   9   4        751.09        743.02        38.33 o
   2   9   4       1260.39       1214.13        50.07 o
   3   9   4        831.79        786.68        64.86 o
   4   9   4        304.88        326.74        37.27 o
  -6  10   4        173.67        172.94        34.28 o
  -5  10   4        842.87        808.76        45.95 o
  -4  10   4        898.07        891.50        30.40 o
  -3  10   4       1249.88       1394.33        86.49 o
  -2  10   4       1237.83       1264.54        40.25 o
  -1  10   4        520.99        551.34        35.75 o
   0  10   4       1395.06       1311.95        50.07 o
   1  10   4       1237.99       1268.50        51.16 o
   2  10   4        736.09        734.91        44.05 o
   3  10   4        252.92        281.50        35.26 o
  -5  11   4        354.99        392.38        40.55 o
  -4  11   4        524.92        530.81        29.97 o
  -3  11   4       1397.24       1528.33        73.62 o
  -2  11   4       1085.79       1171.01        52.50 o
  -1  11   4       1587.42       1554.90        57.36 o
   0  11   4        690.18        693.99        42.10 o
   1  11   4        545.53        574.86        41.45 o
   2  11   4        370.41        396.38        40.35 o
  -4  12   4        679.10        714.47        49.77 o
  -3  12   4        689.57        810.32       104.74 o
  -2  12   4        595.53        692.13        46.52 o
  -1  12   4       1125.92       1126.76        54.84 o
   0  12   4        658.20        653.78        44.95 o
   1  12   4        531.89        530.35        43.96 o
  -1 -13   5        377.56        341.07        39.20 o
   0 -13   5        485.99        472.76        43.33 o
   1 -13   5        753.90        739.92        47.32 o
   2 -13   5        678.79        696.96        47.83 o
   3 -13   5        399.93        369.52        61.27 o
  -2 -12   5        655.63        649.32        47.73 o
  -1 -12   5        696.05        693.66        46.63 o
   0 -12   5        339.48        330.18        35.78 o
   1 -12   5        687.99        646.05        68.92 o
   2 -12   5        333.98        355.91        26.14 o
   3 -12   5        987.97        904.71        37.88 o
   4 -12   5        653.24        659.80        67.58 o
  -3 -11   5        304.16        320.23        37.98 o
  -2 -11   5        783.76        763.49        47.04 o
  -1 -11   5        412.28        436.12        38.41 o
   0 -11   5        531.32        559.67        39.05 o
   1 -11   5        693.49        635.19        29.18 o
   2 -11   5        434.68        447.00        32.45 o
   3 -11   5       1232.68       1227.18        39.54 o
   4 -11   5        792.47        770.76        68.22 o
   5 -11   5        372.20        405.45        43.85 o
  -4 -10   5        793.23        809.59        52.74 o
  -3 -10   5        932.01        968.37        50.95 o
  -2 -10   5        560.51        558.04        51.04 o
  -1 -10   5        631.05        588.91        38.03 o
   0 -10   5       1263.33       1165.90        54.25 o
   1 -10   5        622.70        624.08        26.56 o
   2 -10   5       1764.54       1755.56        95.62 o
   3 -10   5        600.45        647.07        35.08 o
   4 -10   5        769.70        784.75        47.29 o
   5 -10   5        432.23        446.55        77.70 o
   6 -10   5        247.58        285.08        39.55 o
  -5  -9   5        415.41        433.41        42.47 o
  -4  -9   5        615.21        638.20        44.49 o
  -3  -9   5       1013.14       1052.04        50.01 o
  -2  -9   5        423.85        357.10        49.46 o
  -1  -9   5        783.15        788.21        27.82 o
   0  -9   5       1960.42       2020.33        78.17 o
   1  -9   5        702.81        676.52        34.00 o
   2  -9   5       1145.60       1187.01        57.91 o
   3  -9   5        943.39        992.90        68.10 o
   4  -9   5        743.12        761.96        44.27 o
   5  -9   5        877.46        942.58        80.09 o
   6  -9   5        889.86        962.62        80.01 o
  -5  -8   5        861.92        874.56        50.16 o
  -4  -8   5       1067.73       1035.17        88.13 o
  -3  -8   5        968.82        895.47        43.32 o
  -2  -8   5       1104.53       1115.16        49.12 o
  -1  -8   5        856.20        742.98        79.74 o
   0  -8   5        329.28        306.40        19.69 o
   1  -8   5       1185.82       1223.41        94.79 o
   2  -8   5        912.54        893.26        28.63 o
   3  -8   5       1541.62       1537.80        80.11 o
   4  -8   5        781.23        756.83        41.38 o
   5  -8   5        327.78        342.27        36.19 o
   6  -8   5        585.91        603.24        48.40 o
  -6  -7   5        682.24        746.04        46.67 o
  -5  -7   5        936.83        961.28        73.16 o
  -4  -7   5       1365.14       1361.05        96.48 o
  -3  -7   5        834.89        838.86        28.19 o
  -2  -7   5       1253.70       1328.92        73.14 o
  -1  -7   5       4675.16       4516.61        81.90 o
   0  -7   5        994.02        800.64        67.87 o
   1  -7   5       1889.25       1919.02       142.12 o
   2  -7   5       1863.37       1953.37        70.91 o
   3  -7   5       1144.50       1148.51        43.98 o
   4  -7   5       1537.20       1485.90       131.74 o
   5  -7   5        968.17        981.78        62.06 o
   6  -7   5        383.49        394.78        41.18 o
  -6  -6   5        795.74        797.25        80.09 o
  -5  -6   5        538.78        601.16        52.94 o
  -4  -6   5        578.51        612.23        26.54 o
  -3  -6   5       1471.22       1370.36        33.13 o
  -2  -6   5       4408.75       4471.65       116.44 o
  -1  -6   5       1862.16       1867.53        65.35 o
   0  -6   5       1411.01       1158.75        89.01 o
   1  -6   5        819.73        714.95        22.93 o
   2  -6   5       1698.79       1731.64        68.32 o
   3  -6   5       2321.98       2383.18        51.48 o
   4  -6   5       1306.36       1361.10        49.79 o
   5  -6   5       1591.69       1697.60       104.20 o
   6  -6   5        395.47        450.12        43.81 o
   7  -6   5        433.53        432.48        47.61 o
  -6  -5   5        584.29        560.11        48.82 o
  -5  -5   5       1218.69       1199.89        50.68 o
  -4  -5   5       1319.99       1359.83        34.79 o
  -3  -5   5       3430.70       3369.74        98.99 o
  -2  -5   5       3846.36       3920.64        94.20 o
  -1  -5   5        601.19        511.52        18.69 o
   0  -5   5       2494.15       2423.45        40.34 o
   1  -5   5       2012.48       1770.67       171.84 o
   2  -5   5       1856.62       1859.10        53.80 o
   3  -5   5       1898.10       1917.05        54.09 o
   4  -5   5       1731.09       1772.54        33.70 o
   5  -5   5       1825.27       1803.82        60.90 o
   6  -5   5        563.78        652.42        65.83 o
   7  -5   5        280.60        345.78        46.59 o
  -7  -4   5        570.37        531.26        63.02 o
  -6  -4   5        446.84        451.71        25.58 o
  -5  -4   5        728.69        721.45        34.30 o
  -4  -4   5       2564.03       2500.94        54.21 o
  -3  -4   5       4156.23       4345.32       120.79 o
  -2  -4   5       1401.50       1361.00        61.34 o
  -1  -4   5       2038.90       1850.07        30.95 o
   0  -4   5       2961.69       2951.74        96.00 o
   1  -4   5       4299.75       3942.89       443.84 o
   2  -4   5       2345.92       2388.64        43.53 o
   3  -4   5       1881.58       1906.85        94.99 o
   4  -4   5       2106.27       2171.84        36.51 o
   5  -4   5        608.78        636.87        39.74 o
   6  -4   5       1102.15       1181.41        61.78 o
   7  -4   5        298.28        351.42        42.76 o
  -7  -3   5        621.76        638.29        40.92 o
  -6  -3   5        541.47        541.06        26.94 o
  -5  -3   5        820.58        805.33        28.17 o
  -4  -3   5       3182.70       3024.11        47.54 o
  -3  -3   5       3394.16       3520.41        52.73 o
  -2  -3   5       5110.47       5331.69       125.06 o
  -1  -3   5       6723.61       6984.13        61.46 o
   0  -3   5       3496.02       3505.99        60.41 o
   1  -3   5       2588.89       2361.44       176.68 o
   2  -3   5       2671.28       2718.70        44.91 o
   3  -3   5       2526.40       2688.62        78.02 o
   4  -3   5       2561.74       2713.86        94.83 o
   5  -3   5       1087.87       1197.64        49.49 o
   6  -3   5       1030.20       1094.83        71.83 o
   7  -3   5        700.75        854.18        53.96 o
  -7  -2   5        158.09        192.85        27.89 o
  -6  -2   5        530.90        586.52        30.75 o
  -5  -2   5       1166.78       1153.20        31.85 o
  -4  -2   5       2449.19       2483.52        67.54 o
  -3  -2   5       3049.10       3109.44        42.50 o
  -2  -2   5       2599.80       2709.19        50.87 o
  -1  -2   5       6344.76       6621.32       121.35 o
   0  -2   5       3965.29       3887.22        63.92 o
   1  -2   5       1498.46       1383.69        68.91 o
   2  -2   5       4558.72       4684.26       239.49 o
   3  -2   5       3109.43       3321.60       151.28 o
   4  -2   5       1873.66       1897.86        93.11 o
   5  -2   5       3001.81       3134.61        84.62 o
   6  -2   5        733.03        779.78        87.17 o
   7  -2   5        946.08       1020.77        56.75 o
  -7  -1   5        605.02        575.93        48.79 o
  -6  -1   5       1029.72       1065.76        60.62 o
  -5  -1   5       1943.01       1960.99        49.22 o
  -4  -1   5        874.63        889.67        25.08 o
  -3  -1   5       1469.11       1467.77        28.15 o
  -2  -1   5       6011.93       6704.60        57.68 o
  -1  -1   5       4781.28       5139.76        42.36 o
   0  -1   5       4095.34       4108.54        38.61 o
   1  -1   5       1126.34       1070.25        39.68 o
   2  -1   5        272.35        232.23        15.69 o
   3  -1   5       3003.45       3206.24       129.34 o
   4  -1   5       1906.02       1942.12        44.81 o
   5  -1   5       1408.31       1480.17        50.89 o
   6  -1   5        954.33       1074.80        50.87 o
   7  -1   5        186.52        185.79        32.37 o
  -7   0   5        763.38        802.60        71.13 o
  -6   0   5        272.26        275.28        43.61 o
  -5   0   5       1410.09       1439.94        34.13 o
  -4   0   5       2593.82       2623.87        44.80 o
  -3   0   5       3952.71       4390.83        47.92 o
  -2   0   5       7192.46       8154.73       103.22 o
  -1   0   5       5936.85       6071.86       327.13 o
   0   0   5       5524.64       5913.37       228.35 o
   1   0   5       5027.27       5440.99       145.93 o
   2   0   5       3500.37       3424.14       277.65 o
   3   0   5       1398.57       1490.16        52.41 o
   4   0   5       3078.18       3171.21        48.55 o
   5   0   5       1000.47       1056.52        31.88 o
   6   0   5       1660.28       1740.75        78.70 o
   7   0   5        530.06        565.04        42.85 o
  -7   1   5        162.44        191.57        28.72 o
  -6   1   5        517.29        521.16        53.02 o
  -5   1   5        408.73        435.79        20.87 o
  -4   1   5       1687.10       1680.39        32.36 o
  -3   1   5       3795.03       4090.64        45.08 o
  -2   1   5       1993.77       1954.47        39.72 o
  -1   1   5       8028.31       8862.88       172.39 o
   0   1   5       1539.23       1401.66        38.19 o
   1   1   5        470.68        377.20        15.10 o
   2   1   5       3193.26       3096.48       217.79 o
   3   1   5       1775.60       1886.13        97.72 o
   4   1   5       2020.20       2078.51        63.40 o
   5   1   5       1910.95       1905.24        41.45 o
   6   1   5        833.27        830.90        43.93 o
  -8   2   5        614.86        600.59        47.11 o
  -7   2   5        375.27        426.62        37.93 o
  -6   2   5        751.08        721.14        39.03 o
  -5   2   5       1019.91       1016.83        28.43 o
  -4   2   5       1553.92       1611.48        31.89 o
  -3   2   5       2695.19       2804.63        83.97 o
  -2   2   5       5102.45       5612.46       164.74 o
  -1   2   5       2488.50       2398.46        66.69 o
   0   2   5        435.55        306.47        12.80 o
   1   2   5       3995.16       4181.67        91.34 o
   2   2   5       2099.13       1983.05       103.14 o
   3   2   5       3105.69       3262.98        61.20 o
   4   2   5        184.97        197.94        16.52 o
   5   2   5       1413.76       1387.23        36.61 o
   6   2   5        660.18        705.04        40.78 o
  -7   3   5        665.90        701.25        47.46 o
  -6   3   5        669.66        665.65        38.01 o
  -5   3   5        765.31        753.40        28.72 o
  -4   3   5       1287.33       1310.94        49.54 o
  -3   3   5       1662.63       1568.55        48.09 o
  -2   3   5       6719.27       7773.26        83.72 o
  -1   3   5       2662.13       2577.01        55.12 o
   0   3   5       2651.20       2570.19        29.21 o
   1   3   5       2892.42       2997.10        60.42 o
   2   3   5       1476.98       1418.86        62.94 o
   3   3   5        436.21        431.62        15.93 o
   4   3   5       1212.61       1197.36        31.75 o
   5   3   5       1434.79       1381.25        37.16 o
   6   3   5        684.13        760.83        67.43 o
  -7   4   5        389.67        410.73        37.91 o
  -6   4   5        804.99        800.66        41.46 o
  -5   4   5       1124.29       1075.26        29.12 o
  -4   4   5       1587.68       1566.21        49.28 o
  -3   4   5       1896.03       1890.29        33.89 o
  -2   4   5       3624.26       3791.46        64.78 o
  -1   4   5       2161.52       2078.11        51.71 o
   0   4   5       5197.10       5413.41        59.32 o
   1   4   5       1930.16       1955.98        63.62 o
   2   4   5        865.81        845.52        24.17 o
   3   4   5        217.08        234.25        16.09 o
   4   4   5       2786.66       2624.33       135.02 o
   5   4   5        764.55        800.87        42.44 o
   6   4   5        564.23        536.25        62.61 o
  -7   5   5        698.40        685.98        43.23 o
  -6   5   5        310.22        346.69        33.47 o
  -5   5   5       1055.42        981.75        54.32 o
  -4   5   5        838.57        736.08        30.38 o
  -3   5   5       2195.66       2325.77        55.20 o
  -2   5   5       1885.85       1900.94        40.50 o
  -1   5   5       2580.51       2544.88        46.64 o
   0   5   5       3059.77       3006.86        39.64 o
   1   5   5       1876.58       1934.81        33.32 o
   2   5   5        727.55        795.22        23.35 o
   3   5   5       1313.48       1238.29       101.24 o
   4   5   5       1387.50       1371.88        49.57 o
   5   5   5        760.55        731.27        42.00 o
  -7   6   5        548.11        430.06        39.04 o
  -6   6   5        718.20        662.76        39.62 o
  -5   6   5       1067.72        965.29       104.97 o
  -4   6   5        685.68        686.41        25.74 o
  -3   6   5       2590.67       2735.61        45.28 o
  -2   6   5        949.95        955.15        29.34 o
  -1   6   5       4314.63       4511.87       121.98 o
   0   6   5       2261.47       2160.94        35.18 o
   1   6   5       1054.74        997.50        25.15 o
   2   6   5        557.60        555.79        31.07 o
   3   6   5        942.95        948.25       101.59 o
   4   6   5        232.03        255.50        29.21 o
   5   6   5        501.60        496.41        39.51 o
  -7   7   5        420.88        443.98        46.33 o
  -6   7   5        973.02        873.97        45.25 o
  -5   7   5        498.13        533.66        35.74 o
  -4   7   5       1090.75       1123.92        33.20 o
  -3   7   5       2128.86       2136.59        56.62 o
  -2   7   5       5146.62       5407.95        65.13 o
  -1   7   5       3059.83       3136.76        84.27 o
   0   7   5       1091.72       1027.41        25.81 o
   1   7   5       1392.83       1314.77        48.15 o
   2   7   5       1135.74       1137.58        43.71 o
   3   7   5       1674.36       1663.50        69.59 o
   4   7   5        792.60        787.38        45.05 o
   5   7   5        290.06        312.67        35.73 o
  -7   8   5        337.69        329.00        38.09 o
  -6   8   5        742.37        737.34        44.28 o
  -5   8   5        463.39        454.13        35.25 o
  -4   8   5       1406.04       1417.76        38.26 o
  -3   8   5        640.22        652.03        28.96 o
  -2   8   5       2123.73       2252.65        74.87 o
  -1   8   5        952.94        974.58        28.08 o
   0   8   5       1775.49       1578.33        47.43 o
   1   8   5       1690.31       1614.85        50.43 o
   2   8   5       1335.50       1343.12        49.50 o
   3   8   5        409.36        349.26        33.70 o
   4   8   5        508.49        469.85        40.59 o
  -6   9   5        739.21        689.44        45.60 o
  -5   9   5        818.59        786.44        43.99 o
  -4   9   5        586.90        587.95        39.07 o
  -3   9   5       1321.80       1399.57        38.91 o
  -2   9   5       1178.90       1205.03        39.36 o
  -1   9   5       1616.49       1603.96        50.83 o
   0   9   5       2418.19       2271.59       123.53 o
   1   9   5       1180.68       1087.09        67.32 o
   2   9   5        625.92        596.56        39.28 o
   3   9   5        413.08        442.53        40.49 o
  -6  10   5        404.50        420.22        41.52 o
  -5  10   5        741.92        790.03        46.53 o
  -4  10   5        549.23        633.97        27.60 o
  -3  10   5       1271.70       1337.92        49.92 o
  -2  10   5       1097.84       1099.59        88.06 o
  -1  10   5       1199.26       1190.92        48.23 o
   0  10   5       1879.70       1827.10        84.36 o
   1  10   5       1214.31       1190.84        50.76 o
   2  10   5        432.26        428.68        53.73 o
   3  10   5        433.13        418.18        41.60 o
  -5  11   5        256.15        329.46        36.40 o
  -4  11   5        547.04        555.53        27.64 o
  -3  11   5       1201.29       1317.88        56.00 o
  -2  11   5        526.07        594.67        40.89 o
  -1  11   5        949.07       1015.88        49.93 o
   0  11   5       1279.42       1301.76       132.94 o
   1  11   5        606.97        621.62        43.30 o
   2  11   5        766.49        746.11        48.25 o
  -4  12   5        307.07        451.68        77.24 o
  -3  12   5        460.52        520.49        74.29 o
  -2  12   5        470.54        562.20        45.45 o
  -1  12   5       1341.22       1356.16        79.47 o
   0  12   5        769.12        780.59        48.39 o
  -1 -13   6        535.61        549.09        46.21 o
   0 -13   6        260.67        261.23        35.64 o
   1 -13   6        436.71        481.17        43.24 o
   2 -13   6        180.62        235.96        33.79 o
   3 -13   6        495.86        627.28        55.24 o
  -2 -12   6        815.69        851.89        53.02 o
  -1 -12   6        193.01        228.35        32.48 o
   0 -12   6        247.89        261.28        32.89 o
   1 -12   6        541.69        597.28        42.60 o
   2 -12   6        663.49        645.42        36.36 o
   3 -12   6        724.95        721.43        54.14 o
   4 -12   6        342.53        378.95        41.30 o
  -3 -11   6        490.52        517.51        45.02 o
  -2 -11   6        765.79        773.63        47.38 o
  -1 -11   6        456.52        508.16        40.45 o
   0 -11   6        902.91        859.26        44.81 o
   1 -11   6        619.70        626.47        29.25 o
   2 -11   6        431.55        474.50        27.92 o
   3 -11   6        381.13        369.03        26.56 o
   4 -11   6        648.99        709.83        67.70 o
   5 -11   6        325.79        396.25        44.62 o
  -4 -10   6        762.67        823.83        52.77 o
  -3 -10   6        830.80        829.02        88.56 o
  -2 -10   6        669.87        642.98        61.27 o
  -1 -10   6       1231.22       1132.42       101.14 o
   0 -10   6        775.00        789.07        35.47 o
   1 -10   6        519.88        538.24        46.81 o
   2 -10   6        384.95        404.20        25.53 o
   3 -10   6        580.52        607.27        29.69 o
   4 -10   6        656.69        633.10        44.98 o
   5 -10   6        620.64        646.17        48.71 o
  -5  -9   6        771.92        807.26        72.43 o
  -4  -9   6        658.06        627.57        66.07 o
  -3  -9   6       1191.85       1189.25        52.30 o
  -2  -9   6        580.52        606.67        53.45 o
  -1  -9   6       2432.58       2133.09       135.26 o
   0  -9   6       1992.95       1973.60       147.54 o
   1  -9   6        691.41        736.03        39.35 o
   2  -9   6        979.48        998.16        33.17 o
   3  -9   6       1031.08       1123.72        86.77 o
   4  -9   6        706.93        737.52        46.14 o
   5  -9   6       1204.65       1227.26        58.59 o
   6  -9   6        528.10        604.13        50.19 o
  -5  -8   6        552.28        512.98       102.43 o
  -4  -8   6        637.37        700.05       115.08 o
  -3  -8   6        281.63        322.99        31.33 o
  -2  -8   6       2297.44       2314.41       150.70 o
  -1  -8   6       1393.15       1249.87        98.88 o
   0  -8   6       1373.71       1172.02        84.84 o
   1  -8   6       1196.50       1210.63        91.33 o
   2  -8   6        906.00        915.27        30.57 o
   3  -8   6        800.46        743.94        28.37 o
   4  -8   6        943.78        985.98        47.40 o
   5  -8   6        561.59        592.78        79.35 o
   6  -8   6       1066.21       1132.08        60.27 o
  -6  -7   6        616.83        653.86       106.87 o
  -5  -7   6        373.79        385.88        36.75 o
  -4  -7   6        874.04        853.01        46.74 o
  -3  -7   6       1321.40       1259.86        34.34 o
  -2  -7   6       5225.66       4977.09       181.09 o
  -1  -7   6       2235.74       2274.63       110.72 o
   0  -7   6        861.10        696.21        72.84 o
   1  -7   6       1296.68       1201.84        35.15 o
   2  -7   6       1610.65       1676.04        63.73 o
   3  -7   6        760.86        808.87        28.07 o
   4  -7   6       1348.24       1412.52        61.11 o
   5  -7   6        947.86        908.27       104.15 o
   6  -7   6        454.32        527.84        46.70 o
  -6  -6   6        454.70        475.32        40.25 o
  -5  -6   6        678.95        683.24        36.87 o
  -4  -6   6        481.65        545.19        35.92 o
  -3  -6   6       4235.24       3964.20        90.61 o
  -2  -6   6       1446.16       1407.08        34.28 o
  -1  -6   6       2381.86       2339.46        64.30 o
   0  -6   6       2109.06       1974.74        76.13 o
   1  -6   6       3131.03       2825.02       269.84 o
   2  -6   6       2357.85       2487.14        61.95 o
   3  -6   6       1650.84       1777.31        37.69 o
   4  -6   6       1304.53       1231.42        48.46 o
   5  -6   6       1319.51       1415.73        63.98 o
   6  -6   6        559.66        625.15        47.07 o
  -6  -5   6        433.92        438.42        28.27 o
  -5  -5   6        763.09        751.76        30.85 o
  -4  -5   6        594.71        611.54        42.68 o
  -3  -5   6       1868.19       1778.78       105.72 o
  -2  -5   6       2229.18       2198.35        38.77 o
  -1  -5   6       3745.68       3645.82        80.42 o
   0  -5   6       4262.55       4385.61       138.00 o
   1  -5   6       2893.43       2506.68       306.59 o
   2  -5   6        624.30        618.57        26.12 o
   3  -5   6       1788.67       1882.34        37.12 o
   4  -5   6       1658.54       1699.87        35.84 o
   5  -5   6        948.16       1048.14        63.52 o
   6  -5   6        992.34        993.63        88.23 o
   7  -5   6        405.94        438.72        46.89 o
  -7  -4   6        200.45        181.87        26.49 o
  -6  -4   6        582.70        576.11        28.77 o
  -5  -4   6        415.01        407.62        32.19 o
  -4  -4   6       2117.23       2126.73        47.35 o
  -3  -4   6       1537.29       1587.20        63.22 o
  -2  -4   6       2674.91       2608.28        73.26 o
  -1  -4   6       2300.80       2259.23        35.53 o
   0  -4   6       5620.91       5702.59       150.00 o
   1  -4   6       3073.18       2740.27       276.18 o
   2  -4   6       1782.40       1707.14        91.24 o
   3  -4   6       1036.03       1115.38        41.75 o
   4  -4   6       1134.09       1217.39        30.30 o
   5  -4   6       1594.27       1601.42        57.52 o
   6  -4   6       1384.24       1472.01        61.91 o
   7  -4   6        818.85       1012.65        59.51 o
  -7  -3   6        310.67        325.47        34.28 o
  -6  -3   6        977.49        963.71        33.88 o
  -5  -3   6        601.45        636.48        26.81 o
  -4  -3   6       1527.25       1518.24        35.31 o
  -3  -3   6       1527.28       1534.50        47.91 o
  -2  -3   6       2950.68       2986.55        64.54 o
  -1  -3   6       4073.21       4143.71        44.96 o
   0  -3   6       2980.38       2872.20        37.71 o
   1  -3   6       3424.25       3341.09       202.08 o
   2  -3   6        933.37        875.08        69.59 o
   3  -3   6       1225.38       1248.78        55.07 o
   4  -3   6       1509.09       1546.90        33.95 o
   5  -3   6       1315.85       1360.75        53.10 o
   6  -3   6        594.56        670.46        45.46 o
   7  -3   6        728.99        746.99        52.53 o
  -7  -2   6       1125.64       1125.98        69.63 o
  -6  -2   6        448.15        483.46        26.18 o
  -5  -2   6        731.01        749.55        27.78 o
  -4  -2   6        872.21        903.03        27.31 o
  -3  -2   6       2314.52       2328.11        47.54 o
  -2  -2   6       3568.40       3773.99        48.95 o
  -1  -2   6       4919.25       4971.98        89.85 o
   0  -2   6       6603.83       6820.85        58.12 o
   1  -2   6       3367.53       3403.38       188.49 o
   2  -2   6       2821.46       2637.72       238.82 o
   3  -2   6       2008.66       1950.20        81.07 o
   4  -2   6       1720.50       1730.45        36.42 o
   5  -2   6        969.97       1016.17        46.08 o
   6  -2   6        861.87        898.81        49.17 o
   7  -2   6        811.79        879.83        54.87 o
  -7  -1   6        616.03        689.76        43.98 o
  -6  -1   6        358.32        400.41        30.11 o
  -5  -1   6        366.02        390.66        26.48 o
  -4  -1   6        363.70        389.79        18.98 o
  -3  -1   6       2316.77       2392.64        37.98 o
  -2  -1   6       2710.29       2857.31        68.27 o
  -1  -1   6       2991.35       3065.66       101.70 o
   0  -1   6       6987.44       7319.33        58.81 o
   1  -1   6        106.85         83.83         9.65 o
   2  -1   6       1341.97       1220.20       143.29 o
   3  -1   6       2061.51       2213.58        84.74 o
   4  -1   6       1550.04       1585.96        35.96 o
   5  -1   6        524.71        577.32        44.80 o
   6  -1   6       1263.14       1352.57        56.35 o
   7  -1   6        467.85        526.52        44.84 o
  -7   0   6        437.89        482.91        40.19 o
  -6   0   6       1137.04       1177.12        34.95 o
  -5   0   6       1548.14       1620.72        37.35 o
  -4   0   6       2162.87       2201.72        38.57 o
  -3   0   6       1149.59       1144.58        28.08 o
  -2   0   6       2204.68       2261.21        46.81 o
  -1   0   6       6807.29       7297.13       243.22 o
   0   0   6       2132.82       2192.60        72.77 o
   1   0   6       2469.89       2515.33        81.29 o
   2   0   6       1021.92        957.91        95.16 o
   3   0   6       2173.44       2314.59       103.29 o
   4   0   6        692.98        686.90        25.73 o
   5   0   6        478.23        495.76        24.53 o
   6   0   6        878.74        902.08        46.61 o
  -7   1   6        718.05        735.38        47.24 o
  -6   1   6        698.73        692.94        66.75 o
  -5   1   6        872.72        913.73        28.60 o
  -4   1   6       1229.85       1243.08        29.12 o
  -3   1   6       2198.92       2200.24        51.14 o
  -2   1   6       1637.16       1645.85        51.65 o
  -1   1   6       6451.51       7055.57       238.80 o
   0   1   6       2117.42       1952.84        56.19 o
   1   1   6       4458.57       4784.19       121.35 o
   2   1   6       4322.11       3954.01       456.97 o
   3   1   6       1548.87       1629.21        76.13 o
   4   1   6        174.76        186.64        17.03 o
   5   1   6       1508.03       1498.45        38.67 o
   6   1   6        694.26        700.08        42.00 o
  -7   2   6        667.41        652.06        42.68 o
  -6   2   6        717.65        701.11        38.66 o
  -5   2   6        916.07        940.64        28.72 o
  -4   2   6       1402.14       1408.52        31.05 o
  -3   2   6       1681.51       1689.74        58.04 o
  -2   2   6       1768.31       1732.44        47.36 o
  -1   2   6       2312.94       2280.96        26.60 o
   0   2   6       5273.10       5542.01        50.88 o
   1   2   6       3770.87       3907.14        46.21 o
   2   2   6       2168.03       1872.25       162.57 o
   3   2   6        125.52        128.24        14.16 o
   4   2   6        611.12        648.58        25.56 o
   5   2   6       1188.70       1185.56        35.29 o
   6   2   6       1008.82       1027.40        47.20 o
  -7   3   6       1004.64       1083.24        51.08 o
  -6   3   6       1125.37       1164.26        47.04 o
  -5   3   6        558.42        575.85        23.86 o
  -4   3   6       2328.90       2389.66        86.81 o
  -3   3   6       1079.78       1027.84        25.19 o
  -2   3   6       4935.88       5430.98        74.21 o
  -1   3   6       2679.26       2639.16        38.06 o
   0   3   6       2924.50       3049.41        55.23 o
   1   3   6       2301.85       2324.97        36.46 o
   2   3   6       1585.00       1535.59       170.03 o
   3   3   6       1243.28       1319.57        32.74 o
   4   3   6       1535.21       1558.55        37.23 o
   5   3   6        580.92        585.72        30.45 o
   6   3   6        349.52        386.01        58.82 o
  -7   4   6        870.43        821.82        46.15 o
  -6   4   6       1099.69       1073.63        46.37 o
  -5   4   6       1710.72       1635.17        69.23 o
  -4   4   6       1155.99       1204.23        51.89 o
  -3   4   6       1493.19       1482.60        38.47 o
  -2   4   6       1551.32       1614.73        31.22 o
  -1   4   6       3735.54       3816.66        70.24 o
   0   4   6       4704.51       4895.44        50.18 o
   1   4   6       2038.84       2060.00        54.32 o
   2   4   6       1197.53       1079.30        51.29 o
   3   4   6       1473.59       1516.93        29.27 o
   4   4   6        493.48        424.70        50.22 o
   5   4   6        659.50        662.32        39.08 o
  -7   5   6        927.08        888.67        47.75 o
  -6   5   6        428.88        414.97        46.59 o
  -5   5   6       1831.28       1804.05        75.14 o
  -4   5   6        988.59        953.71        28.88 o
  -3   5   6       1591.93       1610.74        41.41 o
  -2   5   6       2765.38       2807.64        42.36 o
  -1   5   6       5684.83       5863.74       105.98 o
   0   5   6       2854.89       2855.00        36.05 o
   1   5   6       2331.20       2453.10        64.42 o
   2   5   6       2072.97       1975.51        38.46 o
   3   5   6       1325.53       1149.19       132.92 o
   4   5   6       1189.10       1195.99        41.16 o
   5   5   6        462.34        476.74        37.71 o
  -7   6   6        541.83        519.76        41.41 o
  -6   6   6        552.06        543.71        37.21 o
  -5   6   6        852.15        820.48        92.51 o
  -4   6   6       1705.55       1646.78        43.49 o
  -3   6   6        977.71       1012.77        29.38 o
  -2   6   6       1858.64       1925.61        37.32 o
  -1   6   6       1956.63       2036.17        47.52 o
   0   6   6       1370.67       1294.49        29.49 o
   1   6   6       1641.66       1599.66        44.92 o
   2   6   6       2694.19       2750.57        74.47 o
   3   6   6        625.99        666.07        37.78 o
   4   6   6        623.35        638.10        31.03 o
   5   6   6        638.42        607.60        43.74 o
  -7   7   6        238.21        241.58        33.60 o
  -6   7   6        955.70        925.55        46.92 o
  -5   7   6       1541.91       1541.05        60.61 o
  -4   7   6       1370.78       1364.57        36.63 o
  -3   7   6       1732.74       1743.46        54.12 o
  -2   7   6       1450.97       1473.82        30.72 o
  -1   7   6       1433.55       1466.87        60.51 o
   0   7   6       1585.71       1495.73        42.83 o
   1   7   6       3013.92       2969.98        64.51 o
   2   7   6       1904.48       1945.54        56.49 o
   3   7   6        768.08        787.20        47.55 o
   4   7   6        298.14        315.23        34.13 o
  -6   8   6        809.67        739.26        44.34 o
  -5   8   6       1201.15       1170.63        49.27 o
  -4   8   6        408.11        445.96        25.23 o
  -3   8   6        579.79        584.58        26.34 o
  -2   8   6       2225.97       2194.57        43.90 o
  -1   8   6       2468.36       2491.19        87.22 o
   0   8   6       1135.22       1053.71        40.85 o
   1   8   6       3046.53       2844.44        66.78 o
   2   8   6        658.73        658.02        62.49 o
   3   8   6        892.45        878.57        46.47 o
   4   8   6        712.74        685.74       105.72 o
  -6   9   6        760.49        717.78        46.35 o
  -5   9   6        554.38        573.18        38.78 o
  -4   9   6        467.53        481.05        30.90 o
  -3   9   6        762.99        794.66        27.90 o
  -2   9   6       1784.06       1830.05        45.67 o
  -1   9   6        369.99        385.72        30.42 o
   0   9   6       1329.36       1239.51        60.28 o
   1   9   6       1031.30        998.00        45.02 o
   2   9   6        879.37        854.57        45.82 o
   3   9   6        570.85        535.38        51.22 o
  -5  10   6        486.94        487.05        39.00 o
  -4  10   6        422.25        446.15        28.32 o
  -3  10   6        638.24        662.05        27.52 o
  -2  10   6        803.60        860.53        44.40 o
  -1  10   6        469.25        495.08        46.17 o
   0  10   6       1971.83       1800.73        59.57 o
   1  10   6        789.37        780.68        44.13 o
   2  10   6        615.71        628.26        43.61 o
  -4  11   6        437.13        442.79        30.13 o
  -3  11   6       1249.20       1319.79        59.98 o
  -2  11   6        293.46        325.62        46.40 o
  -1  11   6        626.77        641.20        43.34 o
   0  11   6        765.22        781.31        45.26 o
   1  11   6        714.73        720.44        45.91 o
  -3  12   6        899.88       1055.74        71.93 o
  -2  12   6        248.98        332.07        38.36 o
  -1  12   6        562.27        613.50        45.28 o
   0 -13   7        666.71        686.33        49.72 o
   1 -13   7        462.99        554.82        46.92 o
   2 -13   7        447.13        538.98        46.01 o
  -2 -12   7        416.52        422.44        42.84 o
  -1 -12   7        404.06        411.85        40.72 o
   0 -12   7       1006.33        992.34        98.04 o
   1 -12   7        987.53       1053.11        59.08 o
   2 -12   7        271.60        333.67        27.79 o
   3 -12   7        236.21        242.52        33.31 o
   4 -12   7        226.47        259.45        49.32 o
  -3 -11   7        771.62        789.34        52.87 o
  -2 -11   7        465.40        467.35        43.62 o
  -1 -11   7       1196.53       1208.71        54.07 o
   0 -11   7       1161.87       1177.67        85.27 o
   1 -11   7        704.09        681.34        32.02 o
   2 -11   7        349.70        380.53        28.05 o
   3 -11   7        938.53        908.04        53.64 o
   4 -11   7        387.29        446.14        43.55 o
  -4 -10   7        467.98        507.83        46.88 o
  -3 -10   7        307.30        336.88        38.55 o
  -2 -10   7        382.56        405.39        43.68 o
  -1 -10   7       1638.16       1695.48       130.07 o
   0 -10   7        993.24       1065.64        73.98 o
   1 -10   7        767.91        774.54        40.37 o
   2 -10   7        870.52        901.55        44.36 o
   3 -10   7        610.64        644.27        31.11 o
   4 -10   7        462.96        507.92        42.80 o
   5 -10   7        365.54        323.43        38.83 o
  -4  -9   7        589.17        599.76        45.08 o
  -3  -9   7        235.02        232.20        30.31 o
  -2  -9   7       2086.32       1939.55        48.44 o
  -1  -9   7       2696.87       2251.78       204.13 o
   0  -9   7       1794.28       1601.83        41.47 o
   1  -9   7        506.29        530.11        37.46 o
   2  -9   7       1354.60       1384.52        39.64 o
   3  -9   7        726.40        742.82        30.99 o
   4  -9   7        588.96        573.99        41.59 o
   5  -9   7        720.50        660.60        48.19 o
  -5  -8   7        441.99        487.52        50.72 o
  -4  -8   7        511.06        535.87        68.92 o
  -3  -8   7        921.86        847.44        31.69 o
  -2  -8   7       1691.18       1675.50        92.29 o
  -1  -8   7       1125.81       1050.39        41.50 o
   0  -8   7       1759.59       1560.20       172.78 o
   1  -8   7       2071.63       2084.45        45.42 o
   2  -8   7       1748.29       1802.03        42.83 o
   3  -8   7       1136.75       1202.59        37.07 o
   4  -8   7        694.91        643.74        41.68 o
   5  -8   7        897.36        857.72        49.59 o
   6  -8   7        895.80        921.62        56.32 o
  -5  -7   7        639.68        564.20        40.90 o
  -4  -7   7        569.14        553.88        27.73 o
  -3  -7   7        875.52        856.29        38.98 o
  -2  -7   7        770.92        719.06        27.81 o
  -1  -7   7       1639.86       1617.72        57.27 o
   0  -7   7        960.61        832.64        72.03 o
   1  -7   7       3115.69       2861.96       311.68 o
   2  -7   7       1374.56       1426.37        36.87 o
   3  -7   7        747.17        767.63        28.91 o
   4  -7   7        796.13        771.10        41.85 o
   5  -7   7        477.74        501.11        40.33 o
   6  -7   7        554.42        595.61        47.89 o
  -6  -6   7        404.39        426.00        77.43 o
  -5  -6   7        821.52        833.96        43.66 o
  -4  -6   7        666.63        650.15        65.90 o
  -3  -6   7        954.93        924.90        42.31 o
  -2  -6   7       1774.54       1717.84        42.87 o
  -1  -6   7       1991.01       1936.68        39.27 o
   0  -6   7       3219.48       3158.97        93.08 o
   1  -6   7       2057.40       1749.96       231.38 o
   2  -6   7       2804.48       2808.42        48.53 o
   3  -6   7        872.73        876.36        29.01 o
   4  -6   7        405.04        426.96        33.22 o
   5  -6   7        829.01        841.72        46.54 o
   6  -6   7        656.15        606.01        46.76 o
  -6  -5   7        569.16        604.26        46.81 o
  -5  -5   7        578.47        592.05        29.07 o
  -4  -5   7        638.53        677.15        27.77 o
  -3  -5   7        858.36        855.78        30.79 o
  -2  -5   7       2283.00       2191.45        50.29 o
  -1  -5   7       2109.69       2001.66        38.22 o
   0  -5   7       2184.90       2111.62        69.77 o
   1  -5   7       2316.93       2040.23       230.24 o
   2  -5   7       2176.31       2142.43       153.37 o
   3  -5   7        871.26        914.84        28.53 o
   4  -5   7       1051.59       1088.13        31.45 o
   5  -5   7       1093.63       1033.47        49.43 o
   6  -5   7        549.75        634.10        46.69 o
  -7  -4   7        309.28        323.14        27.63 o
  -6  -4   7       1097.56       1091.15        37.69 o
  -5  -4   7        931.91        956.43        33.70 o
  -4  -4   7        728.93        798.10        29.02 o
  -3  -4   7        769.70        790.23        26.15 o
  -2  -4   7       1045.42        942.89        25.65 o
  -1  -4   7       3386.68       3312.27        44.43 o
   0  -4   7       2453.78       2409.71        45.31 o
   1  -4   7       4720.94       4542.63       427.16 o
   2  -4   7       1127.12        985.13        87.45 o
   3  -4   7        785.66        842.02        26.70 o
   4  -4   7       1761.84       1679.92        37.61 o
   5  -4   7       1160.54       1176.19        51.81 o
   6  -4   7        407.73        520.96        43.22 o
  -7  -3   7        456.64        473.25        72.25 o
  -6  -3   7        435.30        435.28        26.37 o
  -5  -3   7        907.34        950.51        46.18 o
  -4  -3   7        323.06        328.75        20.81 o
  -3  -3   7       1670.05       1726.53        35.36 o
  -2  -3   7       1694.54       1652.35        31.18 o
  -1  -3   7        910.21        805.24        20.88 o
   0  -3   7       3069.02       3011.70        40.15 o
   1  -3   7       3005.48       3031.32       115.04 o
   2  -3   7        850.13        704.68        85.01 o
   3  -3   7       1294.42       1314.61        32.32 o
   4  -3   7       1156.71       1181.25        42.37 o
   5  -3   7        429.91        476.24        36.60 o
   6  -3   7        308.60        342.83        37.79 o
  -7  -2   7        470.70        477.67        49.91 o
  -6  -2   7        793.91        834.48        32.97 o
  -5  -2   7       1153.76       1205.20        34.91 o
  -4  -2   7       2659.24       2714.57        46.67 o
  -3  -2   7       1242.33       1280.68        29.42 o
  -2  -2   7       2771.82       2887.49        39.30 o
  -1  -2   7       2329.65       2161.00        29.49 o
   0  -2   7       3916.74       3998.14        55.26 o
   1  -2   7       3576.01       3747.71       105.79 o
   2  -2   7       1348.41       1278.56       149.37 o
   3  -2   7       1445.49       1511.12        34.68 o
   4  -2   7       1156.01       1211.54        33.22 o
   5  -2   7        384.54        406.39        34.13 o
   6  -2   7        391.85        454.30        40.76 o
  -7  -1   7        348.68        428.90        38.47 o
  -6  -1   7       1305.19       1380.17        53.35 o
  -5  -1   7        513.24        533.59        24.91 o
  -4  -1   7       1365.02       1443.01        51.24 o
  -3  -1   7       1752.15       1726.97        34.36 o
  -2  -1   7       2980.25       3067.13        41.17 o
  -1  -1   7       1819.68       1731.48        41.43 o
   0  -1   7       2443.24       2468.66        39.78 o
   1  -1   7       1961.76       1976.97        43.52 o
   2  -1   7       4808.21       4684.70       596.83 o
   3  -1   7       3891.44       4055.61        56.60 o
   4  -1   7        676.65        703.32        27.11 o
   5  -1   7        445.51        476.24        35.62 o
   6  -1   7        617.07        647.53        42.88 o
  -7   0   7        727.50        719.49        45.39 o
  -6   0   7       1167.47       1243.40        37.25 o
  -5   0   7       2078.92       2152.98        43.47 o
  -4   0   7        244.09        254.66        17.02 o
  -3   0   7       2494.25       2602.13        70.77 o
  -2   0   7       1150.64       1154.18        36.53 o
  -1   0   7       1538.07       1425.39        37.61 o
   0   0   7       4155.19       4460.83       211.56 o
   1   0   7       2615.62       2711.30        92.20 o
   2   0   7       2590.94       2457.58       287.27 o
   3   0   7        556.01        591.29        23.96 o
   4   0   7        604.66        671.84        45.14 o
   5   0   7        407.94        463.92        25.30 o
   6   0   7        809.96        860.78        64.23 o
  -7   1   7       1037.95       1121.87        52.22 o
  -6   1   7       1064.79       1031.21        51.56 o
  -5   1   7       1897.98       1959.12        40.97 o
  -4   1   7       1776.45       1829.61        66.36 o
  -3   1   7       3082.58       3247.33        41.04 o
  -2   1   7       2335.28       2430.34        88.41 o
  -1   1   7       4713.93       5068.47        89.59 o
   0   1   7       3977.27       4198.71       160.76 o
   1   1   7       4614.91       5029.49       101.17 o
   2   1   7       1579.58       1320.94       227.54 o
   3   1   7        965.56       1026.04        29.79 o
   4   1   7       2003.09       2037.71        46.02 o
   5   1   7        780.09        835.02        31.39 o
   6   1   7        537.21        571.43        39.99 o
  -7   2   7        563.74        566.74        40.37 o
  -6   2   7       1505.00       1607.30        70.33 o
  -5   2   7        828.22        810.40        27.75 o
  -4   2   7       2268.31       2363.04        53.23 o
  -3   2   7       1854.02       1899.72        67.86 o
  -2   2   7       1638.61       1557.67        24.70 o
  -1   2   7       2334.21       2293.26        27.24 o
   0   2   7       3809.22       3899.79        64.43 o
   1   2   7       4372.18       4572.82        76.24 o
   2   2   7        896.86        793.77       104.94 o
   3   2   7       2917.81       2936.54       106.45 o
   4   2   7       1043.58       1081.84        32.78 o
   5   2   7        963.88        961.83        33.36 o
   6   2   7        390.95        355.82        50.41 o
  -7   3   7        548.29        509.05        39.95 o
  -6   3   7       1328.40       1342.94        50.27 o
  -5   3   7        456.47        439.99        24.97 o
  -4   3   7       2563.86       2606.66        73.64 o
  -3   3   7       2419.85       2548.43        62.86 o
  -2   3   7       1558.73       1550.66        27.46 o
  -1   3   7       2529.28       2471.74        32.88 o
   0   3   7       3922.10       4066.59        55.59 o
   1   3   7       2979.63       2964.75        43.42 o
   2   3   7       2417.38       2169.41       221.75 o
   3   3   7       2374.40       2373.22        52.01 o
   4   3   7        796.08        793.54        29.16 o
   5   3   7        535.08        516.24        41.39 o
  -7   4   7       1001.71        970.91        50.00 o
  -6   4   7        863.47        832.26        41.98 o
  -5   4   7        604.03        641.69        40.74 o
  -4   4   7       1636.38       1687.07        38.61 o
  -3   4   7       2048.46       2133.51        38.38 o
  -2   4   7       2388.80       2400.27        37.41 o
  -1   4   7       2325.48       2348.28        35.39 o
   0   4   7       3874.11       3897.39        64.16 o
   1   4   7        432.31        467.04        20.57 o
   2   4   7       2201.98       2014.11       214.51 o
   3   4   7       2104.87       2143.88        43.25 o
   4   4   7        823.80        695.67        69.91 o
   5   4   7        603.40        584.90        39.14 o
  -7   5   7       1128.86       1076.39        51.16 o
  -6   5   7        168.94        198.45        26.66 o
  -5   5   7       1933.17       1811.19        85.92 o
  -4   5   7       2400.89       2379.42        77.98 o
  -3   5   7       2060.54       2090.78       103.30 o
  -2   5   7       1861.76       1852.27        35.30 o
  -1   5   7       1424.59       1447.85        30.53 o
   0   5   7       2760.44       2779.35        42.26 o
   1   5   7       1289.38       1379.03        28.61 o
   2   5   7       3163.98       2937.26       151.52 o
   3   5   7       1579.11       1651.79       123.93 o
   4   5   7        750.90        775.79        44.88 o
   5   5   7        311.38        390.79        37.15 o
  -7   6   7        408.80        404.43        39.74 o
  -6   6   7        357.26        374.38        33.83 o
  -5   6   7       1397.85       1296.72       108.81 o
  -4   6   7       1617.05       1634.65        54.21 o
  -3   6   7        416.55        415.75        22.06 o
  -2   6   7        313.06        325.92        22.88 o
  -1   6   7       5253.97       5215.33        94.30 o
   0   6   7       1212.36       1125.58        26.00 o
   1   6   7       2140.76       2061.60        35.51 o
   2   6   7       2073.43       2042.62        48.94 o
   3   6   7        667.13        696.64        30.40 o
   4   6   7       1126.78       1171.37        67.48 o
  -6   7   7        674.48        642.92        41.25 o
  -5   7   7        925.77        817.83        85.45 o
  -4   7   7        705.39        724.94        28.95 o
  -3   7   7        912.02        947.86        30.98 o
  -2   7   7        961.63        976.59        30.03 o
  -1   7   7       2074.51       2001.53        43.04 o
   0   7   7        479.50        475.12        19.32 o
   1   7   7       1412.61       1393.54        38.33 o
   2   7   7        984.86        989.51        35.15 o
   3   7   7        806.33        811.05        34.47 o
   4   7   7        128.38        144.88        34.02 o
  -6   8   7        643.24        594.34        41.64 o
  -5   8   7        923.07        911.66        44.27 o
  -4   8   7        703.03        748.94        31.14 o
  -3   8   7        874.16        897.83        31.65 o
  -2   8   7       2607.79       2584.73        49.62 o
  -1   8   7        641.87        648.43        23.12 o
   0   8   7        883.30        917.93        39.80 o
   1   8   7       1373.30       1380.05        49.82 o
   2   8   7        943.53        907.53        45.20 o
   3   8   7        730.75        723.15        35.42 o
  -6   9   7        499.47        492.64        40.90 o
  -5   9   7        235.20        239.38        29.75 o
  -4   9   7        715.71        697.88        31.69 o
  -3   9   7        362.68        385.29        25.12 o
  -2   9   7       1394.99       1375.84        34.17 o
  -1   9   7        544.85        521.61        27.63 o
   0   9   7        810.56        813.56        40.43 o
   1   9   7        929.88        927.69        44.86 o
   2   9   7        807.50        792.96        45.00 o
  -5  10   7        352.52        378.05        37.08 o
  -4  10   7        456.93        475.97        40.78 o
  -3  10   7        721.67        794.93        33.72 o
  -2  10   7        941.27        926.20        49.67 o
  -1  10   7        715.15        717.25        34.14 o
   0  10   7        776.61        748.42        41.99 o
   1  10   7        379.86        379.60        36.26 o
   2  10   7        541.83        550.19        57.27 o
  -4  11   7        513.46        527.98        36.03 o
  -3  11   7        697.55        758.69        59.89 o
  -2  11   7        206.58        286.60        57.86 o
  -1  11   7        711.60        715.02        37.14 o
   0  11   7        472.19        519.66        40.32 o
  -2 -12   8        202.28        179.74        46.74 o
  -1 -12   8        413.68        403.38        41.20 o
   0 -12   8       1134.89       1123.61        54.93 o
   1 -12   8        694.90        710.30        47.44 o
   2 -12   8        428.78        433.12        31.53 o
   3 -12   8        436.15        451.39        80.20 o
  -3 -11   8        476.07        574.88        77.65 o
  -2 -11   8        343.48        385.52        39.90 o
  -1 -11   8        888.86        894.53        49.15 o
   0 -11   8       1201.78       1201.63        43.17 o
   1 -11   8        717.49        744.83        34.92 o
   2 -11   8        832.23        865.14        41.50 o
   3 -11   8        759.54        720.25        56.74 o
   4 -11   8        434.25        438.95        45.37 o
  -4 -10   8        170.57        253.17        37.34 o
  -3 -10   8        561.63        584.68        45.90 o
  -2 -10   8        739.37        730.26        43.74 o
  -1 -10   8        758.93        676.36        58.36 o
   0 -10   8        845.24        834.07        34.64 o
   1 -10   8        984.77       1047.01        45.85 o
   2 -10   8        918.74        949.17        36.63 o
   3 -10   8        986.49       1013.14        38.24 o
   4 -10   8        577.13        542.66        58.12 o
   5 -10   8        281.99        319.01        41.09 o
  -4  -9   8        703.01        749.70        78.13 o
  -3  -9   8        751.49        710.63        54.50 o
  -2  -9   8        452.75        485.03        27.73 o
  -1  -9   8        929.34        850.60        66.08 o
   0  -9   8        383.68        355.29        29.86 o
   1  -9   8        988.71       1024.18        36.26 o
   2  -9   8       1060.44       1078.40        48.82 o
   3  -9   8       1024.94       1048.60        36.98 o
   4  -9   8        632.78        634.98        42.88 o
   5  -9   8        213.36        249.83        35.30 o
  -5  -8   8        409.77        459.17        53.13 o
  -4  -8   8       1019.08        982.86        54.07 o
  -3  -8   8        435.18        478.74        26.88 o
  -2  -8   8        531.47        581.45        30.55 o
  -1  -8   8       1292.46       1280.51        38.07 o
   0  -8   8       2483.53       2210.34       267.07 o
   1  -8   8       1418.65       1355.69        64.90 o
   2  -8   8       1099.98       1058.57        35.45 o
   3  -8   8       1639.07       1733.64        57.59 o
   4  -8   8        363.88        347.60        34.49 o
   5  -8   8        515.19        543.54        58.43 o
  -5  -7   8        475.36        450.70        57.38 o
  -4  -7   8        495.73        518.66        34.17 o
  -3  -7   8        485.21        517.22        26.27 o
  -2  -7   8        980.71        910.65        31.25 o
  -1  -7   8        770.36        823.19        55.87 o
   0  -7   8       1725.34       1574.07       101.21 o
   1  -7   8        894.01        786.32       125.17 o
   2  -7   8       1749.65       1768.21        42.19 o
   3  -7   8       1054.21       1133.50        38.01 o
   4  -7   8        311.41        314.66        32.04 o
   5  -7   8        692.41        619.02        43.16 o
   6  -7   8        670.83        611.07        60.32 o
  -6  -6   8        301.05        337.69        39.00 o
  -5  -6   8        853.82        874.47        35.25 o
  -4  -6   8       1112.99       1075.92        50.94 o
  -3  -6   8        797.69        760.46        44.16 o
  -2  -6   8        798.34        751.09        27.28 o
  -1  -6   8       1388.58       1387.66        34.75 o
   0  -6   8       1418.94       1367.93        35.63 o
   1  -6   8       1256.15       1065.86       148.57 o
   2  -6   8       2131.93       2152.30       138.53 o
   3  -6   8        351.75        338.56        24.63 o
   4  -6   8        741.53        781.33        48.13 o
   5  -6   8        814.91        776.49        45.17 o
   6  -6   8        673.25        700.15        49.16 o
  -6  -5   8        332.67        364.51        28.59 o
  -5  -5   8        605.26        607.52        30.28 o
  -4  -5   8        854.89        905.31        56.59 o
  -3  -5   8       1136.06       1125.53        68.97 o
  -2  -5   8       1362.11       1348.62        32.86 o
  -1  -5   8       1673.82       1595.76        34.65 o
   0  -5   8        941.54        894.89        26.80 o
   1  -5   8       1856.80       1705.98       191.93 o
   2  -5   8       2046.49       1920.55       222.27 o
   3  -5   8       1131.09       1096.87        32.11 o
   4  -5   8       1173.49       1194.50        47.53 o
   5  -5   8        414.42        458.21        98.85 o
   6  -5   8        260.89        221.55        32.97 o
  -6  -4   8        576.62        609.57        31.65 o
  -5  -4   8        816.23        884.43        33.77 o
  -4  -4   8       1049.34       1098.84        33.94 o
  -3  -4   8       1722.04       1732.87        37.96 o
  -2  -4   8        951.06        913.32        26.00 o
  -1  -4   8       4397.15       4315.17        52.20 o
   0  -4   8       1360.34       1266.65        29.22 o
   1  -4   8       2281.90       2202.98       139.71 o
   2  -4   8       1364.82       1217.78       137.68 o
   3  -4   8       1424.36       1507.39        36.65 o
   4  -4   8       1035.00       1021.82        32.06 o
   5  -4   8        878.89        815.15        44.90 o
   6  -4   8        130.42        126.64        31.77 o
  -7  -3   8         76.37        124.33        25.68 o
  -6  -3   8        510.35        537.87        29.37 o
  -5  -3   8       1317.04       1368.66        39.90 o
  -4  -3   8       1589.30       1618.27        48.06 o
  -3  -3   8        988.05       1027.12        28.82 o
  -2  -3   8       2002.16       1967.37        41.67 o
  -1  -3   8       2104.10       1930.68        44.04 o
   0  -3   8       1904.63       1829.90        55.01 o
   1  -3   8       2060.74       2041.14        73.06 o
   2  -3   8       1387.82       1297.47       192.15 o
   3  -3   8       3288.36       3397.79        53.60 o
   4  -3   8        791.40        804.46        29.20 o
   5  -3   8        893.23        930.39        46.29 o
   6  -3   8        450.59        476.57        64.26 o
  -7  -2   8        577.37        612.85        70.46 o
  -6  -2   8        736.32        758.08        32.78 o
  -5  -2   8       1812.03       1882.48        72.50 o
  -4  -2   8       2106.92       2155.79        42.69 o
  -3  -2   8        333.24        346.24        17.97 o
  -2  -2   8       4085.59       4330.95       121.89 o
  -1  -2   8        700.32        627.16        15.73 o
   0  -2   8       2237.25       2290.50        58.47 o
   1  -2   8       2171.78       2232.91        39.19 o
   2  -2   8       2804.47       2657.72       343.77 o
   3  -2   8        848.17        848.24        28.91 o
   4  -2   8        717.66        744.38        28.93 o
   5  -2   8        464.35        492.94        36.65 o
   6  -2   8        558.79        605.36        43.57 o
  -7  -1   8        513.59        546.24        40.77 o
  -6  -1   8        945.39       1016.60        35.85 o
  -5  -1   8       1183.98       1224.44        49.93 o
  -4  -1   8       2363.77       2381.51        98.94 o
  -3  -1   8       2560.69       2753.63        74.85 o
  -2  -1   8       2708.19       2835.99        81.15 o
  -1  -1   8       3210.98       3146.47        58.58 o
   0  -1   8       3295.54       3377.97        58.12 o
   1  -1   8       4230.99       4591.07       121.95 o
   2  -1   8       6225.54       6138.48       797.04 o
   3  -1   8        324.28        314.08        20.47 o
   4  -1   8       1251.30       1331.73        36.78 o
   5  -1   8       1186.46       1164.74        77.82 o
   6  -1   8        606.34        655.06        43.68 o
  -7   0   8        349.96        414.90        38.55 o
  -6   0   8        703.56        733.22        30.63 o
  -5   0   8       1833.09       1816.87        71.12 o
  -4   0   8        160.50        195.33        15.61 o
  -3   0   8       2640.40       2791.94        59.57 o
  -2   0   8       2750.73       2742.55        67.98 o
  -1   0   8       3450.38       3423.49        60.84 o
   0   0   8       1739.53       1719.01        68.47 o
   1   0   8       2711.12       2807.55       100.93 o
   2   0   8       1234.99       1206.94       136.58 o
   3   0   8       1897.10       1963.46        42.72 o
   4   0   8       1821.73       1829.97        42.66 o
   5   0   8       1390.07       1443.67        44.93 o
   6   0   8        447.12        460.23        40.67 o
  -7   1   8        623.99        677.94        44.09 o
  -6   1   8        931.47        911.25        48.38 o
  -5   1   8       2145.68       2170.48        43.61 o
  -4   1   8        683.68        715.91        24.01 o
  -3   1   8       2734.34       2919.75        46.58 o
  -2   1   8       3458.74       3634.61        88.47 o
  -1   1   8       1561.35       1499.86        40.97 o
   0   1   8       1626.89       1602.70        59.38 o
   1   1   8       4242.31       4569.76       181.07 o
   2   1   8       1580.91       1439.18       146.30 o
   3   1   8       1669.19       1686.20        92.56 o
   4   1   8       1705.33       1680.82        44.78 o
   5   1   8        450.89        471.66        26.64 o
   6   1   8        343.03        330.98        35.69 o
  -7   2   8        315.84        359.12        36.52 o
  -6   2   8       2017.14       1822.70       164.67 o
  -5   2   8        433.59        463.47        23.32 o
  -4   2   8       1424.30       1429.37        32.45 o
  -3   2   8       1694.45       1776.76        43.27 o
  -2   2   8       3179.01       3285.77        84.09 o
  -1   2   8       2479.35       2431.02        52.09 o
   0   2   8       3546.16       3527.96        56.16 o
   1   2   8       3695.57       3655.61       146.61 o
   2   2   8        801.77        678.49        66.49 o
   3   2   8       1397.66       1325.03        35.70 o
   4   2   8       1990.84       1993.90        44.77 o
   5   2   8        631.19        585.28        48.84 o
  -7   3   8        359.17        348.16        47.17 o
  -6   3   8        873.49        888.27        42.22 o
  -5   3   8        320.36        354.36        21.61 o
  -4   3   8       2026.22       2006.03        39.07 o
  -3   3   8       3062.44       3143.18        61.57 o
  -2   3   8       1838.64       1791.74        30.99 o
  -1   3   8        896.12        853.55        19.93 o
   0   3   8       2991.60       2905.65        40.30 o
   1   3   8       2718.99       2679.18        52.53 o
   2   3   8       1152.93       1047.54        88.01 o
   3   3   8       2078.11       2048.44        44.15 o
   4   3   8        816.43        785.11        30.18 o
   5   3   8        718.61        700.73        39.79 o
  -7   4   8        613.91        649.04        43.32 o
  -6   4   8        340.83        401.43        32.69 o
  -5   4   8        727.07        751.06        46.84 o
  -4   4   8       1409.14       1426.65        41.42 o
  -3   4   8       2506.69       2577.43        89.63 o
  -2   4   8        327.83        333.93        15.89 o
  -1   4   8       1183.58       1164.76        26.10 o
   0   4   8       3703.33       3619.80        47.99 o
   1   4   8       1036.00       1030.69        38.43 o
   2   4   8       2067.19       1878.69       238.70 o
   3   4   8       1569.48       1602.36        45.25 o
   4   4   8        704.45        643.69        44.45 o
   5   4   8        563.31        532.19        38.82 o
  -7   5   8        628.70        610.93        64.50 o
  -6   5   8        548.05        481.42        35.18 o
  -5   5   8       1275.75       1192.34        35.14 o
  -4   5   8        977.07        999.31        38.63 o
  -3   5   8        464.79        472.20        21.91 o
  -2   5   8       1281.95       1245.57        29.64 o
  -1   5   8       1597.86       1502.24        32.05 o
   0   5   8       2635.91       2558.81        42.35 o
   1   5   8        835.60        854.31        28.13 o
   2   5   8        889.60        829.63        94.76 o
   3   5   8        944.45        969.44        43.87 o
   4   5   8        467.72        443.70        41.56 o
  -6   6   8        719.70        704.27        40.67 o
  -5   6   8        693.42        652.45        34.44 o
  -4   6   8        893.46        888.63        30.61 o
  -3   6   8        791.23        823.49        28.25 o
  -2   6   8       2373.54       2360.04        53.08 o
  -1   6   8       2758.11       2760.97        46.01 o
   0   6   8       1020.93       1034.66        29.71 o
   1   6   8       1082.03       1108.69        31.82 o
   2   6   8       1272.44       1349.17        49.00 o
   3   6   8        840.39        865.95        44.26 o
   4   6   8        798.29        789.87        46.28 o
  -6   7   8        838.22        901.53        55.69 o
  -5   7   8        519.62        513.51        28.16 o
  -4   7   8        462.47        461.92        25.92 o
  -3   7   8       1384.89       1342.35        51.46 o
  -2   7   8        103.00        112.65        14.62 o
  -1   7   8       1489.01       1479.88        36.41 o
   0   7   8        940.22        847.90        76.78 o
   1   7   8       1152.99       1189.80        37.28 o
   2   7   8        895.53        884.72        43.44 o
   3   7   8        510.81        533.70        39.10 o
  -6   8   8        491.23        431.23        57.75 o
  -5   8   8        420.94        387.00        38.61 o
  -4   8   8        670.08        685.89        30.29 o
  -3   8   8       1085.14       1081.51        35.35 o
  -2   8   8       1041.45       1050.93        33.63 o
  -1   8   8        708.46        669.73        30.33 o
   0   8   8       1245.90       1244.82        38.51 o
   1   8   8        848.16        823.87        33.99 o
   2   8   8        444.31        478.16        29.58 o
   3   8   8        964.23        996.75        74.02 o
  -5   9   8        319.89        287.33        47.64 o
  -4   9   8       1827.27       1892.36        62.72 o
  -3   9   8        567.18        582.41        36.52 o
  -2   9   8        902.61        873.65        32.61 o
  -1   9   8        738.53        712.43        31.95 o
   0   9   8       1040.45       1043.82        38.09 o
   1   9   8        728.13        752.87        34.86 o
   2   9   8        996.56        995.63        40.71 o
  -4  10   8        898.54        912.83        46.24 o
  -3  10   8        395.41        391.63        37.45 o
  -2  10   8        553.77        537.85        37.96 o
  -1  10   8       1102.78       1058.74        40.14 o
   0  10   8        450.19        480.15        37.40 o
   1  10   8        547.39        554.80        41.41 o
  -3  11   8        284.34        350.03        48.17 o
  -2  11   8        515.55        560.09        41.17 o
  -1  11   8        754.99        762.32        37.10 o
  -1 -12   9        538.78        581.27        51.99 o
   0 -12   9        489.48        579.88        47.34 o
   1 -12   9        529.69        597.22        51.54 o
   2 -12   9        400.57        449.73        33.38 o
  -2 -11   9        302.15        350.88        39.45 o
  -1 -11   9        436.21        460.47        42.35 o
   0 -11   9        366.83        411.42        31.20 o
   1 -11   9        518.78        569.83        32.99 o
   2 -11   9        668.62        695.96        35.29 o
   3 -11   9        335.79        368.47        39.37 o
  -3 -10   9        560.56        585.95        43.60 o
  -2 -10   9        546.81        605.95        42.34 o
  -1 -10   9        254.18        255.52        34.93 o
   0 -10   9        958.89        935.83        47.96 o
   1 -10   9       1332.51       1294.74        45.19 o
   2 -10   9        506.09        521.67        31.18 o
   3 -10   9        734.63        724.06        34.89 o
   4 -10   9        668.99        709.69        66.22 o
  -4  -9   9        469.22        463.59        39.80 o
  -3  -9   9        194.72        238.67        33.30 o
  -2  -9   9        706.49        721.41        45.05 o
  -1  -9   9        456.02        427.18        41.79 o
   0  -9   9        456.46        405.90        31.52 o
   1  -9   9       1076.22       1075.54        37.85 o
   2  -9   9        498.66        558.20        30.33 o
   3  -9   9        919.48        976.48        51.23 o
   4  -9   9        352.83        351.92        37.43 o
   5  -9   9        164.99        180.45        31.23 o
  -5  -8   9        264.41        264.05        38.89 o
  -4  -8   9        358.53        318.27        33.15 o
  -3  -8   9       1245.09       1173.57        38.65 o
  -2  -8   9        570.48        591.49        29.81 o
  -1  -8   9       1441.49       1502.56        44.00 o
   0  -8   9       1033.31        981.36       116.58 o
   1  -8   9        639.39        612.62        71.49 o
   2  -8   9        700.14        717.03        31.66 o
   3  -8   9        667.12        742.17        51.87 o
   4  -8   9        332.72        356.64        87.99 o
   5  -8   9        536.58        515.85        42.65 o
  -5  -7   9        529.41        483.17        54.09 o
  -4  -7   9        474.22        461.10        27.25 o
  -3  -7   9       1046.26        957.35        35.21 o
  -2  -7   9       1165.15       1154.76        35.80 o
  -1  -7   9        545.67        579.57        27.03 o
   0  -7   9       2309.24       2223.86       111.76 o
   1  -7   9        988.43        901.13       129.80 o
   2  -7   9       1020.61       1032.17        57.76 o
   3  -7   9       1006.52       1016.92        35.13 o
   4  -7   9        963.90        857.74        59.63 o
   5  -7   9        582.70        516.80        49.77 o
  -5  -6   9        350.53        351.65        28.03 o
  -4  -6   9        910.21        901.74        49.36 o
  -3  -6   9        719.58        710.57        30.70 o
  -2  -6   9       1239.81       1201.97        36.87 o
  -1  -6   9        829.84        879.13        29.56 o
   0  -6   9       2366.33       2281.53        98.98 o
   1  -6   9       1005.14        864.87       111.61 o
   2  -6   9       1004.54        947.13        85.59 o
   3  -6   9        828.21        830.35        31.36 o
   4  -6   9        969.50        968.05        62.26 o
   5  -6   9        474.45        444.37        86.34 o
  -6  -5   9        326.18        359.99        29.21 o
  -5  -5   9        424.15        447.92        27.77 o
  -4  -5   9       1612.16       1657.21        42.72 o
  -3  -5   9       2155.24       2053.38        81.11 o
  -2  -5   9        523.46        475.91        22.10 o
  -1  -5   9       2278.22       2285.43        42.07 o
   0  -5   9       1306.79       1267.39        32.51 o
   1  -5   9       2266.78       2080.15       187.34 o
   2  -5   9       1169.96       1082.40       142.19 o
   3  -5   9       1423.24       1430.46        38.24 o
   4  -5   9        767.31        757.50        41.38 o
   5  -5   9        334.26        331.18        35.31 o
   6  -5   9        511.61        526.82        48.22 o
  -6  -4   9        540.28        573.36        32.05 o
  -5  -4   9        982.61       1050.96        36.89 o
  -4  -4   9       1044.77       1064.72        34.09 o
  -3  -4   9       1959.13       1945.92        40.98 o
  -2  -4   9       1008.29        931.70        26.58 o
  -1  -4   9       3202.31       3112.05        45.84 o
   0  -4   9       1481.09       1448.14        51.09 o
   1  -4   9       1036.90        999.00        32.81 o
   2  -4   9       1923.13       1821.85       233.93 o
   3  -4   9       2078.45       2071.57        44.41 o
   4  -4   9        856.40        854.84        50.01 o
   5  -4   9        316.58        319.79        34.54 o
   6  -4   9        535.02        598.37        45.69 o
  -6  -3   9        753.90        832.16        38.80 o
  -5  -3   9        910.97        966.09        34.35 o
  -4  -3   9       1658.51       1729.50        40.80 o
  -3  -3   9       1396.77       1398.29        39.64 o
  -2  -3   9       1446.11       1486.67        37.01 o
  -1  -3   9       2026.73       1947.61        31.62 o
   0  -3   9       4597.59       4700.44       116.01 o
   1  -3   9       1689.29       1667.31        44.97 o
   2  -3   9       3900.40       3633.24       501.20 o
   3  -3   9       2140.37       2190.35        59.16 o
   4  -3   9        405.66        398.02        24.17 o
   5  -3   9        797.90        769.08        49.37 o
   6  -3   9        935.27        907.93        51.72 o
  -7  -2   9        388.95        467.90        39.71 o
  -6  -2   9        536.64        614.65        31.05 o
  -5  -2   9        680.75        725.08        30.26 o
  -4  -2   9       1992.86       1938.54        55.19 o
  -3  -2   9         96.04        105.97        12.33 o
  -2  -2   9       2003.33       2130.55        97.66 o
  -1  -2   9       3621.65       3569.31        88.27 o
   0  -2   9       2191.26       2281.91        63.64 o
   1  -2   9       2504.76       2566.40        58.81 o
   2  -2   9        637.25        624.35        68.94 o
   3  -2   9       1625.17       1649.45        77.31 o
   4  -2   9        669.66        673.20        39.59 o
   5  -2   9       1438.29       1501.90       148.74 o
   6  -2   9        658.29        707.97        46.42 o
  -7  -1   9        685.57        757.87        64.54 o
  -6  -1   9        559.95        617.53        30.26 o
  -5  -1   9       1789.93       1810.47        42.37 o
  -4  -1   9       2299.27       2385.93        55.47 o
  -3  -1   9       1004.44       1053.88        33.44 o
  -2  -1   9       2081.34       2043.45        52.28 o
  -1  -1   9       4124.19       4125.47        71.28 o
   0  -1   9       1052.63       1022.62        19.54 o
   1  -1   9       2149.40       2281.13        81.82 o
   2  -1   9       3338.49       3137.97       372.29 o
   3  -1   9        902.92        911.21        52.62 o
   4  -1   9        768.78        784.50        31.53 o
   5  -1   9       1269.47       1262.73        52.41 o
   6  -1   9        230.81        197.86        33.01 o
  -7   0   9        377.69        405.04        55.79 o
  -6   0   9        525.67        550.60        27.87 o
  -5   0   9       1468.88       1524.88        37.99 o
  -4   0   9        368.67        385.13        24.11 o
  -3   0   9       2007.78       2114.44        37.23 o
  -2   0   9       2595.56       2543.95        94.88 o
  -1   0   9       1654.82       1578.94        45.16 o
   0   0   9       2608.56       2600.61        67.32 o
   1   0   9       1730.47       1771.05        33.05 o
   2   0   9       5960.82       5462.43       644.73 o
   3   0   9        692.60        650.67        45.05 o
   4   0   9       1476.68       1514.02        43.30 o
   5   0   9        750.68        707.24        41.58 o
  -7   1   9        439.88        427.72        60.27 o
  -6   1   9        561.55        528.72        34.32 o
  -5   1   9        978.01        978.47        34.26 o
  -4   1   9        519.24        553.79        21.81 o
  -3   1   9       1051.32       1104.85        43.75 o
  -2   1   9       3145.27       3320.91        91.61 o
  -1   1   9        686.48        615.58        30.76 o
   0   1   9       1337.18       1401.77        59.58 o
   1   1   9       3228.70       3283.81        68.12 o
   2   1   9       1315.04       1221.71       121.96 o
   3   1   9        867.08        852.11        30.92 o
   4   1   9       1124.89       1102.48        40.11 o
   5   1   9        409.06        428.55        26.35 o
  -7   2   9        477.33        522.07        66.33 o
  -6   2   9        791.24        700.09       107.56 o
  -5   2   9        732.80        728.03        47.57 o
  -4   2   9       1197.21       1215.95        34.11 o
  -3   2   9       2565.59       2602.21       107.99 o
  -2   2   9       1097.23       1177.82        41.86 o
  -1   2   9       1995.29       1901.46        69.25 o
   0   2   9        714.59        748.82        46.16 o
   1   2   9       3385.54       3334.75        55.32 o
   2   2   9        840.17        824.22        83.24 o
   3   2   9       1916.91       1910.30        58.75 o
   4   2   9        939.24        925.24        33.11 o
   5   2   9        591.59        607.44        30.11 o
  -7   3   9        196.42        197.50        45.95 o
  -6   3   9        825.40        655.87       115.61 o
  -5   3   9       1576.33       1510.55        98.92 o
  -4   3   9       1758.66       1769.04        53.43 o
  -3   3   9        778.85        808.37        38.07 o
  -2   3   9        169.49        162.80        21.50 o
  -1   3   9       1850.45       1803.74        27.74 o
   0   3   9       2054.60       1917.18        33.50 o
   1   3   9       2814.93       2703.93       115.62 o
   2   3   9        935.67        855.45        54.01 o
   3   3   9        792.02        802.76        30.62 o
   4   3   9        663.92        628.59        28.69 o
   5   3   9        427.96        432.29        35.94 o
  -7   4   9        312.52        307.43        53.11 o
  -6   4   9        766.98        769.40        65.67 o
  -5   4   9        904.27        949.25        42.38 o
  -4   4   9       1268.33       1280.39        47.10 o
  -3   4   9        237.81        218.16        24.58 o
  -2   4   9       2922.85       2820.71        54.01 o
  -1   4   9        998.78        973.33        24.33 o
   0   4   9       2750.28       2651.29        48.33 o
   1   4   9        853.98        943.65        37.89 o
   2   4   9       1999.82       1809.21       177.44 o
   3   4   9        944.47        910.34        32.52 o
   4   4   9        559.45        561.64        36.81 o
  -6   5   9        757.93        819.34        68.25 o
  -5   5   9       1050.37       1063.43        55.72 o
  -4   5   9        496.24        521.72        34.63 o
  -3   5   9       1108.72       1161.66        45.40 o
  -2   5   9       1800.10       1812.97        53.46 o
  -1   5   9        253.82        275.20        17.65 o
   0   5   9       1187.93       1204.30        30.95 o
   1   5   9       1047.86       1127.37        32.85 o
   2   5   9       1252.56       1090.59       171.23 o
   3   5   9        634.15        656.26        38.56 o
   4   5   9        593.31        621.48        41.17 o
  -6   6   9        931.05        950.03        72.83 o
  -5   6   9       1346.84       1256.80        49.98 o
  -4   6   9        470.02        463.49        33.17 o
  -3   6   9       2056.10       1987.94        74.02 o
  -2   6   9       1095.90       1078.52        30.53 o
  -1   6   9       1290.96       1288.07        33.00 o
   0   6   9        444.53        457.41        22.39 o
   1   6   9       2106.45       1965.08       190.78 o
   2   6   9        676.77        711.14        38.63 o
   3   6   9        828.05        792.79        43.95 o
  -6   7   9        836.59        809.02        70.25 o
  -5   7   9        548.81        504.40        35.56 o
  -4   7   9        662.73        681.33        39.52 o
  -3   7   9       1863.49       1940.55        59.10 o
  -2   7   9        599.56        595.24        26.16 o
  -1   7   9       1237.65       1269.35        44.48 o
   0   7   9       1540.50       1398.85       131.70 o
   1   7   9       1002.09       1021.37        43.34 o
   2   7   9       1038.84       1078.94        48.10 o
   3   7   9       1008.42       1046.51        51.43 o
  -5   8   9        481.94        463.47        85.65 o
  -4   8   9       1476.21       1415.89        53.73 o
  -3   8   9       1184.36       1236.55        49.84 o
  -2   8   9        555.28        583.65        48.94 o
  -1   8   9        342.82        361.99        34.71 o
   0   8   9       1124.05       1191.32        46.04 o
   1   8   9        741.62        773.04        41.23 o
   2   8   9        651.64        643.14        41.42 o
  -5   9   9        672.70        772.63        66.46 o
  -4   9   9       1596.19       1580.94        58.56 o
  -3   9   9        540.36        591.79        39.72 o
  -2   9   9        708.59        701.39        63.37 o
  -1   9   9        665.89        705.68        39.45 o
   0   9   9        827.75        808.95        42.10 o
   1   9   9       1259.76       1223.37        52.18 o
  -3  10   9       1089.98       1148.25        80.85 o
  -2  10   9        501.52        478.94        58.10 o
  -1  10   9        500.51        486.58        58.51 o
   0  10   9        919.86        980.85        48.70 o
   0 -12  10        242.27        271.65        35.09 o
   1 -12  10        331.46        393.27        39.58 o
  -2 -11  10        264.40        273.05        35.59 o
  -1 -11  10        286.52        345.48        41.54 o
   0 -11  10        603.31        597.76        34.89 o
   1 -11  10        320.31        376.21        31.22 o
   2 -11  10        750.92        800.89        39.03 o
   3 -11  10        202.61        250.90        51.30 o
  -3 -10  10        349.13        329.84        37.25 o
  -2 -10  10        672.15        674.09        46.33 o
  -1 -10  10        716.56        643.03        65.38 o
   0 -10  10        804.89        747.28        36.23 o
   1 -10  10        753.93        774.33        36.61 o
   2 -10  10        504.72        582.40        33.50 o
   3 -10  10        410.39        446.73        35.67 o
   4 -10  10        236.98        227.17        33.93 o
  -4  -9  10        330.62        381.10        75.12 o
  -3  -9  10        581.85        564.83        61.78 o
  -2  -9  10        627.46        651.00        32.94 o
  -1  -9  10        912.64        858.64        41.95 o
   0  -9  10        198.34        190.92        24.59 o
   1  -9  10       2204.84       2163.19        90.94 o
   2  -9  10        615.44        642.63        33.73 o
   3  -9  10        463.34        505.14        31.51 o
   4  -9  10        567.34        503.09        73.66 o
  -4  -8  10        401.52        354.65        35.28 o
  -3  -8  10        596.82        608.87        55.21 o
  -2  -8  10        877.30        951.88        36.09 o
  -1  -8  10        731.44        755.02        36.85 o
   0  -8  10        563.91        536.99        48.69 o
   1  -8  10        841.21        866.41       108.54 o
   2  -8  10        909.93        912.06        35.91 o
   3  -8  10        626.32        665.28        55.60 o
   4  -8  10        575.01        534.47        45.35 o
   5  -8  10        583.75        585.11        44.31 o
  -5  -7  10        481.70        445.66        72.78 o
  -4  -7  10        680.04        721.78        32.94 o
  -3  -7  10        966.44        877.98        33.26 o
  -2  -7  10       1796.99       1839.08        44.76 o
  -1  -7  10        425.14        447.76        25.49 o
   0  -7  10       2068.44       1962.27       135.12 o
   1  -7  10       1343.59       1240.05       135.94 o
   2  -7  10       1258.11       1248.97        82.90 o
   3  -7  10       1125.04       1141.90        43.23 o
   4  -7  10        576.96        539.57        56.89 o
   5  -7  10        524.39        534.30       122.98 o
  -5  -6  10        689.42        686.18        41.61 o
  -4  -6  10        734.39        757.89        32.31 o
  -3  -6  10        765.08        731.32        30.02 o
  -2  -6  10       1594.51       1496.51        57.70 o
  -1  -6  10        694.08        680.03        27.33 o
   0  -6  10       1754.54       1754.01        41.39 o
   1  -6  10       1797.16       1650.17       204.42 o
   2  -6  10        839.90        807.27        82.86 o
   3  -6  10       1109.42       1126.07        36.86 o
   4  -6  10       1565.63       1452.13        59.05 o
   5  -6  10        323.49        321.73        63.26 o
  -6  -5  10        489.72        569.47        42.30 o
  -5  -5  10       1137.73       1154.11       129.63 o
  -4  -5  10        652.19        689.20        36.54 o
  -3  -5  10       2187.56       2134.91        45.24 o
  -2  -5  10        488.74        484.96        22.64 o
  -1  -5  10        666.73        670.41        28.51 o
   0  -5  10       2236.32       2313.66        79.04 o
   1  -5  10       2077.77       1898.03       151.79 o
   2  -5  10       1962.75       1855.78       211.20 o
   3  -5  10        973.83        929.92        42.07 o
   4  -5  10       1449.96       1435.71       150.34 o
   5  -5  10        174.93        234.29        32.25 o
  -6  -4  10        580.12        558.13        48.74 o
  -5  -4  10        464.42        467.40        46.88 o
  -4  -4  10        887.14        879.98        42.21 o
  -3  -4  10       1986.07       2022.20        42.46 o
  -2  -4  10        223.25        223.51        15.95 o
  -1  -4  10       1455.28       1407.23        48.06 o
   0  -4  10       1765.81       1810.91        57.60 o
   1  -4  10       2123.91       2072.82       112.83 o
   2  -4  10       1342.61       1217.55       140.78 o
   3  -4  10       1337.86       1306.94        51.17 o
   4  -4  10        799.96        765.68        31.19 o
   5  -4  10        316.47        330.21        57.72 o
  -6  -3  10        931.93       1017.73        49.68 o
  -5  -3  10        564.64        621.13        38.79 o
  -4  -3  10       1968.85       1856.35       126.95 o
  -3  -3  10       1092.62       1130.55        50.72 o
  -2  -3  10        968.45       1050.65        37.97 o
  -1  -3  10       2948.02       2875.32        38.87 o
   0  -3  10       2287.36       2343.05        47.62 o
   1  -3  10       1312.01       1307.18        49.97 o
   2  -3  10        731.55        696.32        94.31 o
   3  -3  10       3230.53       3200.49       156.75 o
   4  -3  10        356.50        344.68        24.63 o
   5  -3  10        978.68       1002.28       113.13 o
  -6  -2  10        563.05        541.33        40.86 o
  -5  -2  10        666.64        722.93        40.80 o
  -4  -2  10        963.43       1045.99        62.18 o
  -3  -2  10        730.01        830.29        58.00 o
  -2  -2  10       2201.87       2203.02        57.73 o
  -1  -2  10       1411.67       1409.80        46.04 o
   0  -2  10       1194.95       1203.83        42.08 o
   1  -2  10        869.77        918.61        52.07 o
   2  -2  10       2325.57       2151.78       301.29 o
   3  -2  10       3340.30       3165.63       227.71 o
   4  -2  10       1008.26       1026.20        35.95 o
   5  -2  10        668.58        614.22        41.42 o
  -6  -1  10        576.24        590.90        53.11 o
  -5  -1  10        963.50        881.17        42.62 o
  -4  -1  10       1351.38       1393.63        68.56 o
  -3  -1  10        421.74        413.57        30.92 o
  -2  -1  10       1189.77       1226.85        44.75 o
  -1  -1  10        903.01        888.19        37.91 o
   0  -1  10       1093.30       1097.48        41.50 o
   1  -1  10       1261.06       1372.22        35.43 o
   2  -1  10       2382.27       2209.47       265.71 o
   3  -1  10        263.39        300.84        26.31 o
   4  -1  10       1067.76       1089.08        36.79 o
   5  -1  10        430.47        428.02        36.69 o
  -7   0  10        603.18        563.30        61.61 o
  -6   0  10        499.35        476.76        44.81 o
  -5   0  10        810.61        825.16        55.24 o
  -4   0  10       1339.20       1296.36       148.66 o
  -3   0  10       3167.91       3169.54        70.51 o
  -2   0  10       1569.01       1572.83        49.88 o
  -1   0  10        868.61        857.20        48.20 o
   0   0  10       1944.41       1967.63        53.26 o
   1   0  10       1063.58       1114.93        45.13 o
   2   0  10       2380.56       2259.68       226.23 o
   3   0  10       1238.61       1177.48        67.99 o
   4   0  10        830.58        858.46        43.32 o
   5   0  10        714.17        724.78        93.98 o
  -7   1  10        305.86        338.99        55.90 o
  -6   1  10        246.54        232.87        28.16 o
  -5   1  10        950.44        934.04        43.35 o
  -4   1  10       1625.77       1610.55        77.36 o
  -3   1  10       2493.26       2538.95        94.39 o
  -2   1  10        227.76        216.54        25.68 o
  -1   1  10        792.12        743.75        35.47 o
   0   1  10       1076.40       1105.84        41.35 o
   1   1  10       2110.52       2174.41        37.93 o
   2   1  10       1227.29       1201.30       125.22 o
   3   1  10       1580.90       1526.89        54.96 o
   4   1  10        745.79        734.24        31.18 o
   5   1  10        417.37        401.02        34.34 o
  -7   2  10        439.77        410.72        59.82 o
  -6   2  10        592.24        532.94       123.32 o
  -5   2  10        907.05        917.23        45.62 o
  -4   2  10       2158.71       2200.16        61.54 o
  -3   2  10        643.15        619.27        36.36 o
  -2   2  10        699.81        729.33        37.00 o
  -1   2  10       2596.46       2405.12        58.96 o
   0   2  10        700.30        615.84        33.11 o
   1   2  10       1321.53       1358.97        34.88 o
   2   2  10       1135.95       1068.98        97.71 o
   3   2  10       1599.76       1542.41        41.05 o
   4   2  10        638.85        606.59        36.51 o
   5   2  10        379.52        363.98        26.20 o
  -6   3  10        624.90        519.71       108.78 o
  -5   3  10       1289.99       1210.27        90.45 o
  -4   3  10       1252.89       1277.53        68.73 o
  -3   3  10        592.91        636.72        60.68 o
  -2   3  10       2403.19       2373.29        75.76 o
  -1   3  10       1890.96       1845.28        52.69 o
   0   3  10       1157.32       1149.11        42.80 o
   1   3  10        401.11        435.46        30.96 o
   2   3  10       1321.88       1231.07       109.18 o
   3   3  10        895.04        892.26        44.57 o
   4   3  10        607.37        582.18        54.76 o
  -6   4  10        475.06        500.97        59.82 o
  -5   4  10       1477.94       1398.33       114.18 o
  -4   4  10       2033.03       2002.18        60.89 o
  -3   4  10       1324.72       1358.66        90.78 o
  -2   4  10       2243.56       2203.85       120.93 o
  -1   4  10       1208.61       1193.43        44.37 o
   0   4  10        626.81        672.24        35.63 o
   1   4  10       1243.49       1265.62        34.07 o
   2   4  10       1604.18       1483.30       152.76 o
   3   4  10        677.15        632.92        68.57 o
   4   4  10       1046.66       1040.22        47.35 o
  -6   5  10        576.74        589.63        63.74 o
  -5   5  10       1062.06       1062.15        48.66 o
  -4   5  10        822.31        879.21        47.72 o
  -3   5  10       1360.82       1350.69        57.03 o
  -2   5  10       1579.78       1558.80        52.37 o
  -1   5  10       1098.61       1062.61        43.08 o
   0   5  10       1031.78       1006.40        42.37 o
   1   5  10       1316.26       1318.30        36.07 o
   2   5  10       1043.98       1014.45       181.61 o
   3   5  10       1203.48       1110.54        61.23 o
  -6   6  10        320.03        237.97        48.60 o
  -5   6  10        967.85        942.67        46.65 o
  -4   6  10        748.49        792.49        60.65 o
  -3   6  10       2234.79       2202.63        94.17 o
  -2   6  10       1716.40       1698.84        86.10 o
  -1   6  10        533.93        575.77        34.85 o
   0   6  10        509.13        502.64        55.84 o
   1   6  10        847.34        785.29        52.73 o
   2   6  10       1098.33       1122.69        46.93 o
   3   6  10        675.75        692.53        42.63 o
  -5   7  10        823.00        768.29        44.00 o
  -4   7  10       1368.58       1392.96        64.11 o
  -3   7  10       1329.52       1389.46        65.57 o
  -2   7  10       1618.92       1601.08        55.47 o
  -1   7  10       1352.41       1323.90        56.48 o
   0   7  10        695.93        680.08        58.44 o
   1   7  10       1026.02       1140.10        58.20 o
   2   7  10        952.76        909.10        45.90 o
  -5   8  10        452.75        396.87        75.57 o
  -4   8  10        635.69        577.39        40.50 o
  -3   8  10       1005.35       1063.19        49.18 o
  -2   8  10        988.54       1022.83        46.98 o
  -1   8  10        542.33        491.54        54.28 o
   0   8  10        848.77        898.92        69.35 o
   1   8  10        947.62       1000.66        74.96 o
  -4   9  10        555.42        549.53        40.98 o
  -3   9  10        965.29       1059.86        50.91 o
  -2   9  10        628.24        641.12        62.95 o
  -1   9  10        851.06        832.39        69.84 o
   0   9  10        842.67        905.15        72.31 o
  -1 -11  11        600.32        668.77        46.64 o
   0 -11  11        484.29        534.20        35.39 o
   1 -11  11        231.09        292.02        29.12 o
   2 -11  11        899.84        940.91        41.99 o
  -2 -10  11        375.04        399.77        38.13 o
  -1 -10  11        739.80        729.88        80.17 o
   0 -10  11        388.93        393.58        61.88 o
   1 -10  11        337.04        389.55        31.42 o
   2 -10  11        470.20        522.74        33.76 o
   3 -10  11        682.86        715.52        47.97 o
  -3  -9  11        584.89        539.26        38.79 o
  -2  -9  11        604.19        683.58        34.78 o
  -1  -9  11       1049.79       1055.35        84.77 o
   0  -9  11        417.86        406.27        62.66 o
   1  -9  11       1321.41       1231.68        83.97 o
   2  -9  11        861.88        851.30        42.87 o
   3  -9  11        962.92        962.36        40.00 o
   4  -9  11        499.77        534.74        52.11 o
  -4  -8  11        762.48        804.73        55.36 o
  -3  -8  11        448.31        404.45        39.73 o
  -2  -8  11        860.85        851.42        50.32 o
  -1  -8  11        777.89        851.44        35.58 o
   0  -8  11        187.79        210.27        33.19 o
   1  -8  11        988.62        909.78        91.98 o
   2  -8  11       1516.83       1478.17        56.09 o
   3  -8  11        581.05        577.67        48.51 o
   4  -8  11        603.77        625.38        43.30 o
  -4  -7  11        797.07        765.08        65.50 o
  -3  -7  11        647.24        563.86        65.83 o
  -2  -7  11       1748.91       1633.78       125.11 o
  -1  -7  11        259.71        286.23        28.73 o
   0  -7  11        860.37        895.69        57.22 o
   1  -7  11        779.61        741.32        82.03 o
   2  -7  11       1232.24       1145.66        60.75 o
   3  -7  11        746.28        792.02        34.19 o
   4  -7  11        657.44        645.44        83.98 o
  -5  -6  11        620.50        672.16        45.55 o
  -4  -6  11        509.20        522.91        39.43 o
  -3  -6  11       1174.11       1137.48        63.85 o
  -2  -6  11       1174.94       1075.93        77.31 o
  -1  -6  11        455.82        476.39        24.41 o
   0  -6  11        803.87        816.68        49.18 o
   1  -6  11       1466.03       1394.51       154.59 o
   2  -6  11       1061.21       1006.31        79.78 o
   3  -6  11        998.96        975.05        36.26 o
   4  -6  11       1240.24       1168.50        91.64 o
   5  -6  11        451.61        343.69        45.50 o
  -5  -5  11        742.83        788.02        46.78 o
  -4  -5  11        704.14        686.92        48.67 o
  -3  -5  11       1060.80       1061.68        62.90 o
  -2  -5  11        388.22        377.33        47.02 o
  -1  -5  11       1407.25       1298.04       107.65 o
   0  -5  11       1666.44       1713.24        49.00 o
   1  -5  11       1404.06       1294.91        90.77 o
   2  -5  11        411.14        394.02        36.15 o
   3  -5  11        660.82        638.64        29.91 o
   4  -5  11       1364.38       1244.28        56.52 o
   5  -5  11        557.05        547.01        41.04 o
  -6  -4  11        151.72        147.11        27.80 o
  -5  -4  11        741.08        704.15        44.09 o
  -4  -4  11        748.51        721.31        61.35 o
  -3  -4  11        961.65        963.94        44.81 o
  -2  -4  11       1416.70       1343.54        49.50 o
  -1  -4  11       1043.89       1040.56        51.94 o
   0  -4  11        925.96        953.35        54.83 o
   1  -4  11        360.79        355.83        27.97 o
   2  -4  11        966.25        954.08       116.26 o
   3  -4  11       1343.22       1271.38        38.80 o
   4  -4  11       1343.31       1275.76        51.78 o
   5  -4  11        534.94        513.07        40.49 o
  -6  -3  11        600.02        598.11        43.04 o
  -5  -3  11        521.60        542.64        39.24 o
  -4  -3  11       1084.50       1100.96        49.01 o
  -3  -3  11       1068.66       1015.18        70.03 o
  -2  -3  11       1389.53       1320.12        51.56 o
  -1  -3  11       1063.72       1091.63        44.18 o
   0  -3  11        233.55        243.56        26.89 o
   1  -3  11        806.03        811.38        27.39 o
   2  -3  11       1336.89       1313.58       178.51 o
   3  -3  11        925.73        957.44        50.09 o
   4  -3  11        520.91        540.97        36.66 o
   5  -3  11        547.33        553.80        56.10 o
  -6  -2  11        696.01        640.17        43.23 o
  -5  -2  11        564.36        531.19        38.01 o
  -4  -2  11        598.18        613.22        40.34 o
  -3  -2  11       2334.26       2166.45       103.41 o
  -2  -2  11       2531.63       2547.89        65.30 o
  -1  -2  11       1103.67       1083.81        43.95 o
   0  -2  11        689.74        715.47        38.57 o
   1  -2  11       1974.56       1970.56        80.14 o
   2  -2  11        784.38        758.21        74.14 o
   3  -2  11       1766.60       1672.15       108.88 o
   4  -2  11        646.86        689.69        31.98 o
   5  -2  11        669.96        653.57        76.67 o
  -6  -1  11        312.79        291.80        33.12 o
  -5  -1  11        529.42        504.93        37.13 o
  -4  -1  11        503.42        488.43        36.09 o
  -3  -1  11       1778.09       1747.68        64.83 o
  -2  -1  11       1866.60       1866.20        56.79 o
  -1  -1  11        472.14        517.38        33.32 o
   0  -1  11       1303.78       1256.29        47.03 o
   1  -1  11        731.67        748.59        40.18 o
   2  -1  11        575.18        559.91        43.22 o
   3  -1  11        757.50        747.23        38.64 o
   4  -1  11       1505.13       1549.82        44.46 o
   5  -1  11        563.75        585.74        41.02 o
  -6   0  11        699.29        709.76        48.69 o
  -5   0  11        573.90        541.67        37.62 o
  -4   0  11       2625.25       2487.85        74.16 o
  -3   0  11       1818.54       1786.29        67.96 o
  -2   0  11        883.31        819.96        56.83 o
  -1   0  11        777.74        793.32        38.79 o
   0   0  11       2284.90       2225.64       114.37 o
   1   0  11        730.02        771.51        59.79 o
   2   0  11        937.98        844.73        64.95 o
   3   0  11        657.74        633.19        38.73 o
   4   0  11        876.08        859.01        34.90 o
   5   0  11        412.84        375.60        35.22 o
  -6   1  11        612.55        578.42        55.21 o
  -5   1  11        720.09        653.50        53.92 o
  -4   1  11       1216.35       1152.34        49.69 o
  -3   1  11       1494.65       1464.46        53.20 o
  -2   1  11       1337.04       1407.01        71.25 o
  -1   1  11       2606.71       2442.70        69.58 o
   0   1  11       2440.62       2360.71        81.99 o
   1   1  11        917.64        978.47        58.67 o
   2   1  11        544.24        479.17        35.46 o
   3   1  11       1260.86       1122.93        53.25 o
   4   1  11        630.02        614.94        48.66 o
  -6   2  11        190.35        184.26        26.92 o
  -5   2  11        561.51        514.56        37.43 o
  -4   2  11       1020.05       1015.65        47.01 o
  -3   2  11       3024.54       2938.80        76.34 o
  -2   2  11       1337.31       1435.89        51.22 o
  -1   2  11       2617.65       2367.69        62.19 o
   0   2  11        674.57        673.22        36.30 o
   1   2  11        776.64        807.99       120.07 o
   2   2  11       1309.03       1079.29       151.43 o
   3   2  11        772.53        687.18        30.18 o
   4   2  11        838.68        784.73        41.87 o
  -6   3  11        392.96        372.45        96.48 o
  -5   3  11        692.22        681.36        56.00 o
  -4   3  11       1266.68       1266.98        52.27 o
  -3   3  11       1213.10       1158.53        48.80 o
  -2   3  11       2030.86       2014.03        60.41 o
  -1   3  11       1890.23       1834.29        55.28 o
   0   3  11       1294.26       1258.53        65.19 o
   1   3  11        793.07        812.17        76.31 o
   2   3  11        676.82        595.13       134.37 o
   3   3  11       1327.98       1229.12       110.80 o
   4   3  11       1018.18        888.20        50.48 o
  -6   4  11        428.53        347.79       105.61 o
  -5   4  11        655.26        562.06        40.09 o
  -4   4  11       1434.34       1277.01        52.89 o
  -3   4  11        673.07        751.54        41.89 o
  -2   4  11       2554.06       2468.00        87.01 o
  -1   4  11       1537.94       1428.50        50.14 o
   0   4  11       1142.06       1138.66        45.82 o
   1   4  11        847.87        867.52        43.32 o
   2   4  11        658.16        602.57       114.22 o
   3   4  11       1130.20       1121.53       105.89 o
  -6   5  11        479.98        530.09        67.81 o
  -5   5  11        554.26        536.06        39.91 o
  -4   5  11       1098.34       1108.79        50.91 o
  -3   5  11       1687.07       1680.67        67.12 o
  -2   5  11       1283.34       1293.47        60.66 o
  -1   5  11       2508.38       2389.03        64.84 o
   0   5  11       1208.99       1211.16        48.01 o
   1   5  11        842.96        875.34        44.32 o
   2   5  11       1308.95       1345.40        80.71 o
   3   5  11        548.91        565.19        61.61 o
  -5   6  11        723.91        706.21        59.37 o
  -4   6  11        436.42        487.75        38.36 o
  -3   6  11        947.72        981.42        46.93 o
  -2   6  11       1046.81        993.67        51.73 o
  -1   6  11        546.34        544.71        36.34 o
   0   6  11       1162.25       1204.97        64.98 o
   2   6  11        985.85       1166.80        80.85 o
  -5   7  11        337.90        351.97        52.11 o
  -4   7  11        523.36        526.95        40.54 o
  -3   7  11        713.88        764.41        44.80 o
  -2   7  11       1463.42       1393.43        55.10 o
  -1   7  11        936.43        979.84        45.80 o
   0   7  11        743.84        727.79        64.74 o
   1   7  11        831.47        886.77        71.76 o
  -4   8  11        569.98        610.30        42.14 o
  -3   8  11        686.25        771.14        45.54 o
  -2   8  11        634.66        618.28        41.92 o
  -1   8  11       1608.42       1558.04        87.11 o
   0   8  11        579.21        557.21        59.20 o
  -2   9  11        848.15        863.74        74.10 o
  -1 -10  12        858.00        724.82        82.00 o
   0 -10  12        232.13        236.38        46.60 o
   1 -10  12        127.71        160.46        23.31 o
   2 -10  12        659.87        743.31        39.31 o
  -3  -9  12        609.70        616.70        47.12 o
  -2  -9  12        624.71        650.29        45.46 o
  -1  -9  12        825.78        783.82        80.13 o
   0  -9  12        507.26        451.39        29.79 o
   1  -9  12        449.22        434.00        31.99 o
   2  -9  12        468.57        488.48        32.57 o
   3  -9  12        344.59        341.13        37.72 o
  -3  -8  12        552.48        570.70        43.44 o
  -2  -8  12        945.49        984.81        51.45 o
  -1  -8  12        508.61        524.47        41.40 o
   0  -8  12        403.14        372.56        26.56 o
   1  -8  12        887.51        798.65        39.10 o
   2  -8  12        671.30        673.41        34.69 o
   3  -8  12        521.44        536.88        40.75 o
  -4  -7  12        628.74        596.78        43.98 o
  -3  -7  12        614.83        633.74        42.93 o
  -2  -7  12        391.13        461.88        38.91 o
  -1  -7  12        653.70        696.85        68.51 o
   0  -7  12        612.58        580.53        40.96 o
   1  -7  12       1003.71        843.40       101.87 o
   2  -7  12        238.38        253.12        24.19 o
   3  -7  12        527.83        510.30        30.82 o
   4  -7  12        253.48        244.99        32.61 o
  -4  -6  12        650.53        641.86        43.71 o
  -3  -6  12        646.54        668.14        50.65 o
  -2  -6  12        980.66       1006.64        53.88 o
  -1  -6  12       1124.63       1108.51        49.82 o
   0  -6  12       1314.70       1310.15        70.52 o
   1  -6  12        242.84        237.51        25.20 o
   2  -6  12        376.05        335.69        29.80 o
   3  -6  12        543.41        558.94        30.26 o
   4  -6  12        702.08        672.69        44.41 o
  -5  -5  12        510.64        516.61        42.25 o
  -4  -5  12        441.76        458.47        37.95 o
  -3  -5  12        573.40        582.26        39.84 o
  -2  -5  12       1420.02       1297.99        74.83 o
  -1  -5  12       1520.10       1478.52        89.44 o
   0  -5  12       1141.48       1162.18       142.34 o
   1  -5  12         38.58         43.91        18.15 o
   2  -5  12       1216.02       1013.28        86.71 o
   3  -5  12        415.12        390.12        26.29 o
   4  -5  12        955.65        919.16        72.92 o
  -5  -4  12        729.90        741.21        47.21 o
  -4  -4  12        662.67        628.36        45.90 o
  -3  -4  12        720.55        709.89        41.59 o
  -2  -4  12       1408.70       1296.28        51.06 o
  -1  -4  12       1582.87       1531.29        57.89 o
   0  -4  12        484.82        527.38        39.39 o
   1  -4  12       1623.38       1544.64        65.83 o
   2  -4  12        841.42        764.49       198.72 o
   3  -4  12        719.96        672.78        53.05 o
   4  -4  12        408.77        406.15        35.00 o
  -5  -3  12        466.56        421.20        38.48 o
  -4  -3  12        405.30        413.54        36.24 o
  -3  -3  12        833.41        761.29        42.51 o
  -2  -3  12       1223.07       1118.59        47.85 o
  -1  -3  12       1956.19       1819.19        58.19 o
   0  -3  12        287.35        308.39        46.21 o
   1  -3  12       1863.83       1827.75        61.86 o
   2  -3  12        287.94        315.57        98.58 o
   3  -3  12        380.56        370.64        24.77 o
   4  -3  12        431.30        394.35        43.35 o
  -6  -2  12        725.58        726.18        46.25 o
  -5  -2  12        507.14        485.23        40.92 o
  -4  -2  12       1057.84       1053.51        89.71 o
  -3  -2  12       2387.31       2257.28        66.73 o
  -2  -2  12       1704.54       1598.44        55.91 o
  -1  -2  12        874.72        826.23        71.44 o
   0  -2  12       1461.82       1544.25        85.08 o
   1  -2  12       1113.15       1174.56        50.71 o
   2  -2  12       1264.96       1182.83       272.72 o
   3  -2  12        402.68        497.59        87.49 o
   4  -2  12        488.35        448.54        34.66 o
  -6  -1  12        657.80        656.24        44.31 o
  -5  -1  12        634.55        604.77        48.13 o
  -4  -1  12        679.79        679.43        49.75 o
  -3  -1  12        564.09        542.88        39.00 o
  -2  -1  12       2811.78       2762.79        71.36 o
  -1  -1  12        944.54        954.40        43.73 o
   0  -1  12       3205.05       3129.59        74.99 o
   1  -1  12       1290.81       1364.64        62.76 o
   2  -1  12        736.75        730.52       115.73 o
   3  -1  12       1058.52       1001.53       149.48 o
   4  -1  12        789.16        699.08        75.38 o
  -6   0  12        454.28        429.41        38.49 o
  -5   0  12        476.88        446.68        37.60 o
  -4   0  12        422.65        435.46        48.29 o
  -3   0  12        977.17        954.37        47.19 o
  -2   0  12       1487.88       1413.49        53.25 o
  -1   0  12       2165.76       2130.91        90.69 o
   0   0  12       1521.35       1502.66        53.71 o
   1   0  12       1046.55       1108.79        74.09 o
   2   0  12        599.55        559.89       117.71 o
   3   0  12        524.10        526.00        44.04 o
   4   0  12        590.40        629.82        72.37 o
  -6   1  12        484.12        489.45        39.98 o
  -5   1  12        530.97        485.44        39.08 o
  -4   1  12        863.27        907.45        56.57 o
  -3   1  12       2329.11       2331.03        68.73 o
  -2   1  12        962.25        969.89        45.63 o
  -1   1  12       2841.12       2782.14        70.02 o
   0   1  12       1374.81       1400.96        51.58 o
   1   1  12       1390.12       1452.43        83.88 o
   2   1  12        806.64        684.34        84.58 o
   3   1  12        485.94        467.37        39.29 o
   4   1  12       1259.15       1224.21        53.04 o
  -6   2  12        365.99        307.51        35.74 o
  -5   2  12        649.47        664.90        73.55 o
  -4   2  12       1243.42       1299.74        54.92 o
  -3   2  12        793.94        790.19        44.43 o
  -2   2  12       1233.69       1201.00        50.24 o
  -1   2  12       1131.70       1035.19        45.57 o
   0   2  12       2137.73       2033.11        60.95 o
   1   2  12       1213.20       1276.17        87.92 o
   2   2  12        978.69        817.94       100.90 o
   3   2  12        841.72        774.08        47.06 o
  -6   3  12        361.86        291.07        56.48 o
  -5   3  12        423.80        452.14        38.94 o
  -4   3  12        546.01        592.50        42.22 o
  -3   3  12        945.60        997.60        48.64 o
  -2   3  12       1775.25       1815.07        81.23 o
  -1   3  12       1306.67       1251.56        49.58 o
   0   3  12       1529.12       1395.03        69.99 o
   1   3  12        982.18        977.31        78.06 o
   2   3  12        993.40        874.76       111.48 o
   3   3  12       1370.24       1328.15       110.16 o
  -5   4  12        681.87        655.69        44.18 o
  -4   4  12        530.64        534.23        40.06 o
  -3   4  12        587.46        643.79        42.21 o
  -2   4  12        916.46        916.98        45.82 o
  -1   4  12       1195.98       1126.26        72.02 o
   0   4  12        618.81        569.96        38.30 o
   1   4  12       1402.02       1389.98       138.11 o
   2   4  12        522.34        452.36        39.76 o
   3   4  12        529.05        479.83        57.86 o
  -5   5  12        507.23        487.78        41.63 o
  -4   5  12        489.55        476.41        39.74 o
  -3   5  12        772.71        754.72        44.43 o
  -2   5  12        790.53        816.89        53.37 o
  -1   5  12       1352.03       1336.15        52.51 o
   0   5  12       1104.51       1117.27        49.20 o
   1   5  12        530.74        520.40        38.50 o
   2   5  12       1140.93       1200.56        79.99 o
  -5   6  12        301.01        288.74        54.42 o
  -4   6  12        401.76        401.21        39.28 o
  -3   6  12        683.37        623.95        45.50 o
  -2   6  12        480.55        532.02        39.29 o
  -1   6  12        765.22        751.58        42.70 o
   0   6  12       1601.27       1606.63        58.10 o
   1   6  12        871.04        868.11        73.28 o
  -4   7  12        538.49        535.71        43.20 o
  -3   7  12        279.65        314.96        35.79 o
  -2   7  12        993.77       1033.08        65.64 o
  -1   7  12        557.72        554.79        57.12 o
   0   7  12        345.53        272.05        47.95 o
  -2   8  12        687.25        658.31        43.21 o
  -1   8  12        538.61        534.18        61.61 o
  -2  -9  13        310.17        297.51        36.39 o
  -1  -9  13        387.80        397.27        41.16 o
   0  -9  13        444.98        388.58        95.50 o
   1  -9  13        455.41        458.04        43.02 o
   2  -9  13        176.71        222.81        33.50 o
  -3  -8  13        387.68        447.00        55.47 o
  -2  -8  13        511.60        543.87        43.47 o
  -1  -8  13        547.92        606.20        81.90 o
   0  -8  13       1053.69        890.33       119.55 o
   1  -8  13       1264.01       1135.36       204.55 o
   2  -8  13         75.23         83.89        25.13 o
  -3  -7  13        290.24        327.65        37.16 o
  -2  -7  13        549.40        512.58        90.26 o
  -1  -7  13        934.79        891.33       115.73 o
   0  -7  13       1254.49       1106.58        83.79 o
   1  -7  13        249.80        292.22        59.49 o
   2  -7  13        283.87        301.56        40.56 o
   3  -7  13        417.03        423.05        39.42 o
  -4  -6  13        611.03        575.43        44.96 o
  -3  -6  13        771.25        749.58        46.48 o
  -2  -6  13        593.90        587.82        43.10 o
  -1  -6  13        870.86        876.30       103.41 o
   0  -6  13        707.02        693.08        43.89 o
   1  -6  13        393.28        324.25        36.48 o
   2  -6  13       1200.06       1025.84       107.25 o
   3  -6  13        508.90        472.60        40.51 o
  -4  -5  13        388.20        373.84        38.89 o
  -3  -5  13        576.34        556.92        41.35 o
  -2  -5  13        813.29        779.63        52.80 o
  -1  -5  13       1211.12       1185.78       149.45 o
   0  -5  13        867.57        877.64        68.05 o
   1  -5  13        762.09        725.38        57.34 o
   2  -5  13        865.07        800.74       231.04 o
   3  -5  13        604.47        601.25        43.51 o
  -5  -4  13        824.39        883.63       122.93 o
  -4  -4  13        518.12        528.78        41.59 o
  -3  -4  13        790.17        737.97        44.27 o
  -2  -4  13       1266.18       1212.49        99.25 o
  -1  -4  13       1321.48       1268.13        91.45 o
   0  -4  13       1304.18       1340.63        55.36 o
   1  -4  13       1223.83       1166.64        53.89 o
   2  -4  13        724.06        638.22       170.60 o
   3  -4  13        603.36        608.80        44.37 o
   4  -4  13        423.77        364.94        61.92 o
  -5  -3  13        510.15        549.66        42.83 o
  -4  -3  13        942.16        987.99        50.53 o
  -3  -3  13        405.42        381.43        36.87 o
  -2  -3  13       1033.53       1022.75        48.57 o
  -1  -3  13       1322.74       1204.47        51.60 o
   0  -3  13        988.91       1022.49        59.15 o
   1  -3  13       1839.71       1737.83        63.24 o
   2  -3  13       1009.60        945.30       172.40 o
   3  -3  13        524.15        608.30        48.43 o
   4  -3  13        954.09        784.65        82.09 o
  -5  -2  13        588.75        520.31        41.64 o
  -4  -2  13        492.73        455.86        39.88 o
  -3  -2  13        728.46        670.66        43.54 o
  -2  -2  13        577.51        593.35        54.33 o
  -1  -2  13       1065.59       1029.51        50.75 o
   0  -2  13       1786.08       1849.49        70.06 o
   1  -2  13       1008.55       1037.83        50.76 o
   2  -2  13       1035.91       1046.34       234.25 o
   3  -2  13        397.02        434.87        40.98 o
   4  -2  13        218.80        286.46        35.56 o
  -5  -1  13        484.44        510.64        62.38 o
  -4  -1  13        306.93        323.17        35.46 o
  -3  -1  13       2121.90       2183.80        69.24 o
  -2  -1  13       1724.11       1620.55        58.95 o
  -1  -1  13       1319.20       1397.89        54.60 o
   0  -1  13       1505.26       1496.70        56.55 o
   1  -1  13       1262.37       1355.77        56.15 o
   2  -1  13        964.89        819.36       154.13 o
   3  -1  13       1084.32        947.41        76.87 o
  -5   0  13        288.32        306.86        35.59 o
  -4   0  13       1201.27       1210.37        55.42 o
  -3   0  13        542.27        607.43        48.89 o
  -2   0  13        921.47        859.89        45.82 o
  -1   0  13       1002.45       1015.06        65.57 o
   0   0  13        858.87        953.51        47.14 o
   1   0  13       1622.27       1629.33       107.65 o
   2   0  13        616.85        569.61        95.13 o
   3   0  13        873.79        894.19       174.88 o
  -5   1  13        438.80        375.82        38.93 o
  -4   1  13        866.86        902.38        50.75 o
  -3   1  13        495.61        447.40        38.98 o
  -2   1  13        807.11        876.76        46.01 o
  -1   1  13       1230.65       1217.59        50.77 o
   0   1  13       1275.05       1211.77        51.17 o
   1   1  13        508.42        567.91        60.85 o
   2   1  13       1107.55        957.63       106.17 o
   3   1  13        770.20        772.26        82.97 o
  -5   2  13        766.04        887.65        50.77 o
  -4   2  13        678.32        763.36        48.38 o
  -3   2  13        702.34        756.05        47.83 o
  -2   2  13        664.72        715.02        42.92 o
  -1   2  13        998.31        968.22        46.44 o
   0   2  13       1222.42       1212.72        51.88 o
   1   2  13        860.49        831.06        86.44 o
   2   2  13        929.30        846.95       131.63 o
   3   2  13        398.57        385.26        39.80 o
  -5   3  13        797.35        863.90        51.05 o
  -4   3  13        629.36        607.19        44.40 o
  -3   3  13        856.64        925.54        50.18 o
  -2   3  13        848.22        873.35        46.77 o
  -1   3  13        695.09        697.16        42.44 o
   0   3  13        892.11        932.64        46.78 o
   1   3  13        893.06        873.74        48.11 o
   2   3  13        595.00        585.47        73.81 o
  -5   4  13        452.34        480.27        42.93 o
  -4   4  13        308.53        332.59        37.81 o
  -3   4  13        623.64        636.70        43.62 o
  -2   4  13        627.40        588.60        40.62 o
  -1   4  13        867.72        841.70        45.50 o
   0   4  13        700.29        667.81        42.61 o
   1   4  13        865.80        972.93       111.21 o
   2   4  13        659.80        555.33        91.02 o
  -4   5  13        743.93        789.86        49.16 o
  -3   5  13        443.18        461.05        47.03 o
  -2   5  13        689.74        655.59        43.43 o
  -1   5  13       1226.84       1221.52        53.24 o
   0   5  13        326.31        327.92        34.79 o
   1   5  13        452.67        494.14        56.65 o
  -4   6  13        527.57        547.17        62.78 o
  -3   6  13        663.66        632.26        44.77 o
  -2   6  13       1231.37       1271.56        56.89 o
  -1   6  13        883.22        878.95        47.59 o
   0   6  13        904.63        847.52        74.22 o
  -2   7  13        774.64        797.06        48.83 o
  -2  -8  14        573.59        624.27        55.43 o
  -1  -8  14        597.75        615.81        48.64 o
   0  -8  14        548.79        485.60        71.57 o
   1  -8  14        428.13        352.70        72.47 o
  -3  -7  14        494.79        525.56        46.43 o
  -2  -7  14        434.34        450.93        46.79 o
  -1  -7  14        874.57        880.85        52.40 o
   0  -7  14        381.51        407.41        42.14 o
   1  -7  14        996.32        814.19       109.07 o
   2  -7  14        569.27        577.81        46.32 o
  -3  -6  14        426.28        410.93        41.53 o
  -2  -6  14        444.13        442.44        40.72 o
  -1  -6  14        628.84        724.24        47.10 o
   0  -6  14       1204.58       1042.73        62.42 o
   1  -6  14        681.44        609.49       124.67 o
   2  -6  14        962.59        863.57       105.29 o
  -4  -5  14        591.58        567.56        45.11 o
  -3  -5  14        571.76        531.74        42.02 o
  -2  -5  14        947.93        897.28        49.82 o
  -1  -5  14        724.56        728.90        61.16 o
   0  -5  14        730.40        715.66        72.86 o
   1  -5  14        540.00        565.34       115.99 o
   2  -5  14       1118.59        957.77       169.12 o
   3  -5  14        580.88        585.68        45.81 o
  -4  -4  14        398.63        347.99        37.46 o
  -3  -4  14        424.01        449.65        42.62 o
  -2  -4  14        849.62        894.56        49.12 o
  -1  -4  14        785.71        762.41        46.06 o
   0  -4  14        758.85        832.37        68.11 o
   1  -4  14       1071.68       1036.03       102.76 o
   2  -4  14        514.27        557.07        76.50 o
   3  -4  14        701.96        755.13        52.20 o
  -4  -3  14        174.47        178.43        29.86 o
  -3  -3  14        728.56        730.70        46.12 o
  -2  -3  14       1381.87       1393.30        81.87 o
  -1  -3  14       1348.06       1337.07        56.90 o
   0  -3  14        902.15        922.59        78.20 o
   1  -3  14       1091.30       1152.90        55.86 o
   2  -3  14        839.14        811.53       136.59 o
   3  -3  14        511.18        502.54        72.37 o
  -5  -2  14         81.05        129.62        41.96 o
  -4  -2  14        506.45        499.97        43.60 o
  -3  -2  14        777.26        834.57        48.96 o
  -2  -2  14        538.81        551.62        41.02 o
  -1  -2  14        764.49        764.57        45.35 o
   0  -2  14        756.74        790.02        46.99 o
   1  -2  14        736.06        772.72        88.59 o
   2  -2  14        654.29        611.19       165.12 o
   3  -2  14        294.08        291.95        38.37 o
  -5  -1  14        486.27        471.02        49.34 o
  -4  -1  14        804.55        770.20        60.16 o
  -3  -1  14       1091.95       1055.18        53.30 o
  -2  -1  14        724.65        748.25        45.57 o
  -1  -1  14        390.46        365.03        36.35 o
   0  -1  14       1071.06       1085.09        52.16 o
   1  -1  14        776.67        849.55        49.08 o
   2  -1  14        402.74        385.15        41.85 o
   3  -1  14        939.72        873.37        66.74 o
  -5   0  14        513.32        532.72        44.07 o
  -4   0  14        438.55        477.44        44.02 o
  -3   0  14        677.17        726.11        46.89 o
  -2   0  14        864.52        876.74        48.20 o
  -1   0  14       1021.42       1002.70        54.90 o
   0   0  14        786.87        841.18        47.23 o
   1   0  14       1065.60       1148.22        77.27 o
   2   0  14        764.71        679.40        48.66 o
   3   0  14        455.54        407.35        69.90 o
  -5   1  14        242.14        240.69        34.26 o
  -4   1  14        589.71        591.71        45.93 o
  -3   1  14        638.15        611.13        69.30 o
  -2   1  14        784.59        808.63        47.50 o
  -1   1  14        752.93        776.52        76.10 o
   0   1  14        679.25        709.18        44.00 o
   1   1  14        672.78        724.08        52.01 o
   2   1  14        591.27        563.87        79.13 o
  -4   2  14        409.25        418.10        42.58 o
  -3   2  14        503.95        462.45        43.58 o
  -2   2  14        723.81        692.40        44.98 o
  -1   2  14        775.82        719.61        43.59 o
   0   2  14       1428.65       1445.53        58.45 o
   1   2  14        522.68        563.85        43.00 o
   2   2  14        239.40        267.87        36.10 o
  -4   3  14        622.00        595.30        47.65 o
  -3   3  14        777.29        768.11        53.49 o
  -2   3  14        452.00        451.20        38.47 o
  -1   3  14       1088.94       1065.83        66.20 o
   0   3  14        930.31        969.84        54.85 o
   1   3  14        646.17        747.76       153.54 o
  -4   4  14        540.76        553.59        47.72 o
  -3   4  14        633.70        642.08        46.48 o
  -2   4  14       1102.66       1021.75        52.85 o
  -1   4  14       1151.55       1130.36        53.05 o
   0   4  14       1224.96       1256.53        56.65 o
   1   4  14        471.31        551.11        45.04 o
  -3   5  14        715.42        716.00        48.59 o
  -2   5  14        917.72        913.62        51.44 o
  -1   5  14        635.68        603.52        43.60 o
   0   5  14        327.52        333.53        61.39 o
  -1  -7  15        724.62        757.61        52.40 o
   0  -7  15        905.93        815.95        76.87 o
  -2  -6  15        303.10        282.75        37.63 o
  -1  -6  15        957.41       1041.84        76.65 o
   0  -6  15        620.50        645.65        47.73 o
   1  -6  15        556.60        549.69        62.61 o
  -3  -5  15        350.23        350.50        39.27 o
  -2  -5  15        449.09        416.84        47.07 o
  -1  -5  15        868.61        877.86        52.27 o
   0  -5  15        570.28        600.11        45.91 o
   1  -5  15        844.36        760.81        64.78 o
   2  -5  15        610.74        638.34        50.11 o
  -3  -4  15        358.54        300.04        36.80 o
  -2  -4  15        708.25        728.53        48.93 o
  -1  -4  15        675.75        703.34        47.63 o
   0  -4  15        570.80        614.26        58.31 o
   1  -4  15        399.64        436.19        79.08 o
   2  -4  15        580.75        523.52       112.34 o
  -3  -3  15        476.53        449.53        43.40 o
  -2  -3  15       1164.16       1171.25        56.79 o
  -1  -3  15        405.68        437.62        52.25 o
   0  -3  15        672.77        709.64        48.14 o
   1  -3  15        628.00        646.60        48.17 o
   2  -3  15        498.04        510.01       125.41 o
  -4  -2  15        334.30        324.45        66.17 o
  -3  -2  15        271.29        315.43        39.16 o
  -2  -2  15        433.93        394.56        39.37 o
  -1  -2  15       1093.72       1059.63        54.01 o
   0  -2  15        761.75        862.99        51.47 o
   1  -2  15        661.55        674.82        49.32 o
   2  -2  15        831.40        855.62       193.40 o
  -4  -1  15        241.80        222.82        35.09 o
  -3  -1  15        550.73        579.66        45.26 o
  -2  -1  15        271.24        267.41        34.43 o
  -1  -1  15        704.98        725.54        46.67 o
   0  -1  15        512.55        540.69        62.95 o
   1  -1  15        877.43        906.86        53.65 o
   2  -1  15        742.85        742.68        92.04 o
  -4   0  15        562.11        626.69        48.12 o
  -3   0  15        479.83        485.10        46.26 o
  -2   0  15        959.15        913.17        86.94 o
  -1   0  15        560.34        607.55        66.48 o
   0   0  15       1012.14       1000.26        63.59 o
   1   0  15       1328.77       1362.79        63.29 o
  -4   1  15        468.33        506.74        71.01 o
  -3   1  15        537.32        565.50        45.30 o
  -2   1  15        574.63        531.48        43.63 o
  -1   1  15        736.60        727.74        46.68 o
   0   1  15        803.12        767.47        48.31 o
   1   1  15       1024.81       1073.83        57.43 o
  -3   2  15        354.37        357.84        40.83 o
  -2   2  15        892.24        963.57        61.06 o
  -1   2  15        964.31        903.62        50.85 o
   0   2  15       1003.73       1135.45        56.12 o
   1   2  15        764.05        750.29        74.57 o
  -3   3  15        340.90        339.65        39.62 o
  -2   3  15        987.05        995.06        55.13 o
  -1   3  15        585.24        574.79        44.27 o
   0   3  15        902.14       1024.29        54.84 o
  -2   4  15        598.83        690.10        65.36 o
  -2  -4  16        214.46        194.06        32.43 o
  -1  -4  16        311.29        360.39        42.08 o
   0  -4  16        645.40        699.48        50.68 o
  -2  -3  16        206.15        218.69        33.96 o
  -1  -3  16        339.30        391.08        43.26 o
   0  -3  16        483.60        536.90        46.34 o
  -2  -2  16        785.71        809.02        51.67 o
  -1  -2  16        688.28        695.10        49.37 o
   0  -2  16        565.62        627.64        48.43 o
  -2  -1  16        211.45        224.16        34.18 o
  -1  -1  16        607.44        670.22        48.44 o
   0  -1  16        789.85        842.96        53.71 o
  -2   0  16        274.22        251.77        35.44 o
  -1   0  16        880.17        934.76        54.30 o
   0   0  16        593.36        619.86        47.40 o
  -2   1  16        647.01        628.81        47.76 o
  -1   1  16        792.09        849.34        53.49 o
                                                
