# Supplementary material for: Structure and reactivity of a mononuclear gold(II) complex
Source: Springer Nature journal article supplement (doi:10.1038/nchem.2836), 2017-08-07
Supplement: 41557_2017_BFnchem2836_MOESM14_ESM.mol [file 41557_2017_BFnchem2836_MOESM14_ESM.mol]

nchem.2836-compAuTPP.mol
  ChemDraw07181723332D

 49 56  0  0  0  0  0  0  0  0999 V2000
    0.7153    0.7142    0.0000 N   0  5  0  0  0  0  0  0  0  0  0  0
    0.7153   -0.7148    0.0000 N   0  0  0  0  0  0  0  0  0  0  0  0
    1.8764   -0.0003    0.0000 C   0  0  0  0  0  0  0  0  0  0  0  0
   -0.7125   -0.7154    0.0000 N   0  5  0  0  0  0  0  0  0  0  0  0
    0.0014   -1.8756    0.0000 C   0  0  0  0  0  0  0  0  0  0  0  0
    0.0003    1.8756    0.0000 C   0  0  0  0  0  0  0  0  0  0  0  0
   -0.7148    0.7135    0.0000 N   0  0  0  0  0  0  0  0  0  0  0  0
   -1.8764   -0.0006    0.0000 C   0  0  0  0  0  0  0  0  0  0  0  0
    1.5299    0.5839    0.0000 C   0  0  0  0  0  0  0  0  0  0  0  0
    1.9056    1.3184    0.0000 C   0  0  0  0  0  0  0  0  0  0  0  0
    1.3222    1.9018    0.0000 C   0  0  0  0  0  0  0  0  0  0  0  0
    0.5860    1.5278    0.0000 C   0  0  0  0  0  0  0  0  0  0  0  0
   -1.5272   -0.5852    0.0000 C   0  0  0  0  0  0  0  0  0  0  0  0
   -1.9028   -1.3197    0.0000 C   0  0  0  0  0  0  0  0  0  0  0  0
   -1.3195   -1.9031    0.0000 C   0  0  0  0  0  0  0  0  0  0  0  0
   -0.5833   -1.5291    0.0000 C   0  0  0  0  0  0  0  0  0  0  0  0
   -0.5858    1.5284    0.0000 C   0  0  0  0  0  0  0  0  0  0  0  0
   -1.3209    1.9028    0.0000 C   0  0  0  0  0  0  0  0  0  0  0  0
   -1.9043    1.3194    0.0000 C   0  0  0  0  0  0  0  0  0  0  0  0
   -1.5297    0.5845    0.0000 C   0  0  0  0  0  0  0  0  0  0  0  0
    0.5864   -1.5297    0.0000 C   0  0  0  0  0  0  0  0  0  0  0  0
    1.3215   -1.9041    0.0000 C   0  0  0  0  0  0  0  0  0  0  0  0
    1.9049   -1.3207    0.0000 C   0  0  0  0  0  0  0  0  0  0  0  0
    1.5303   -0.5858    0.0000 C   0  0  0  0  0  0  0  0  0  0  0  0
    0.0006    2.6972    0.0000 C   0  0  0  0  0  0  0  0  0  0  0  0
   -2.6980   -0.0020    0.0000 C   0  0  0  0  0  0  0  0  0  0  0  0
    0.0010   -2.6972    0.0000 C   0  0  0  0  0  0  0  0  0  0  0  0
    2.6980    0.0002    0.0000 C   0  0  0  0  0  0  0  0  0  0  0  0
    0.7150    3.1098    0.0000 C   0  0  0  0  0  0  0  0  0  0  0  0
    0.7150    3.9348    0.0000 C   0  0  0  0  0  0  0  0  0  0  0  0
    0.0006    4.3472    0.0000 C   0  0  0  0  0  0  0  0  0  0  0  0
   -0.7137    3.9348    0.0000 C   0  0  0  0  0  0  0  0  0  0  0  0
   -0.7137    3.1098    0.0000 C   0  0  0  0  0  0  0  0  0  0  0  0
   -3.1123    0.7115    0.0000 C   0  0  0  0  0  0  0  0  0  0  0  0
   -3.9373    0.7115    0.0000 C   0  0  0  0  0  0  0  0  0  0  0  0
   -4.3480   -0.0020    0.0000 C   0  0  0  0  0  0  0  0  0  0  0  0
   -3.9373   -0.7154    0.0000 C   0  0  0  0  0  0  0  0  0  0  0  0
   -3.1123   -0.7154    0.0000 C   0  0  0  0  0  0  0  0  0  0  0  0
    3.1112   -0.7138    0.0000 C   0  0  0  0  0  0  0  0  0  0  0  0
    3.9362   -0.7138    0.0000 C   0  0  0  0  0  0  0  0  0  0  0  0
    4.3480    0.0002    0.0000 C   0  0  0  0  0  0  0  0  0  0  0  0
    3.9362    0.7143    0.0000 C   0  0  0  0  0  0  0  0  0  0  0  0
    3.1112    0.7143    0.0000 C   0  0  0  0  0  0  0  0  0  0  0  0
   -0.7134   -3.1099    0.0000 C   0  0  0  0  0  0  0  0  0  0  0  0
   -0.7134   -3.9349    0.0000 C   0  0  0  0  0  0  0  0  0  0  0  0
    0.0010   -4.3472    0.0000 C   0  0  0  0  0  0  0  0  0  0  0  0
    0.7154   -3.9349    0.0000 C   0  0  0  0  0  0  0  0  0  0  0  0
    0.7154   -3.1099    0.0000 C   0  0  0  0  0  0  0  0  0  0  0  0
   -0.0170   -0.0033    0.0000 Au  0  2  0  0  0  0  0  0  0  0  0  0
  1  9  1  0      
  9 10  1  0      
 10 11  2  0      
 11 12  1  0      
 12  1  1  0      
  4 13  1  0      
 13 14  2  0      
 14 15  1  0      
 15 16  2  0      
 16  4  1  0      
  7 17  2  0      
 17 18  1  0      
 18 19  2  0      
 19 20  1  0      
 20  7  1  0      
  2 21  1  0      
 21 22  1  0      
 22 23  2  0      
 23 24  1  0      
 24  2  2  0      
  6 17  1  0      
  6 12  2  0      
  9  3  2  0      
  3 24  1  0      
 21  5  2  0      
  5 16  1  0      
 13  8  1  0      
  8 20  2  0      
  6 25  1  0      
  8 26  1  0      
  5 27  1  0      
  3 28  1  0      
 25 29  2  0      
 29 30  1  0      
 30 31  2  0      
 31 32  1  0      
 32 33  2  0      
 33 25  1  0      
 26 34  2  0      
 34 35  1  0      
 35 36  2  0      
 36 37  1  0      
 37 38  2  0      
 38 26  1  0      
 28 39  2  0      
 39 40  1  0      
 40 41  2  0      
 41 42  1  0      
 42 43  2  0      
 43 28  1  0      
 27 44  2  0      
 44 45  1  0      
 45 46  2  0      
 46 47  1  0      
 47 48  2  0      
 48 27  1  0      
M  CHG  3   1  -1   4  -1  49   2
M  END
